# Supplementary material for: Transition metal-free approach to azafluoranthene scaffolds by aldol condensation/[1+2+3] annulation tandem reaction of isocyanoacetates with 8-(alkynyl)-1-naphthaldehydes
Source: Royal Society of Chemistry journal article supplement (doi:10.1039/d1cc01015h), 2021-01-01

## Supporting Information

### Transition Metal-free Approach to Azafluoranthene Scaffolds by Aldol Condensation/[1 + 2 + 3] Cycloaddition Tandem Reaction of Isocyanoacetates with 8-(Alkynyl)-1-naphthaldehydes

Penghui Dong<sup>a</sup>, Kashif Majeed<sup>a</sup>, Lingna Wang<sup>a</sup>, Zijian Guo<sup>a</sup>, Fengtao Zhou<sup>b\*</sup>, Qiuyu  
Zhang<sup>a\*</sup>

<sup>a</sup>Xi'an Key Laboratory of Functional Organic Porous Materials, Department of  
Applied Chemistry, School of Chemistry and Chemical Engineering, Northwestern  
Polytechnical University, Xi'an, Shaanxi, 710072, PR China

<sup>b</sup> School of Pharmacy, Jinan University, Guangzhou, Guangdong, 510632, P.R. China

Email address: qyzhang@nwpu.edu.cn (Q. Zhang);  
fengtaozhou@126.com (F. Zhou)

## Table of Contents

|                                                                                                              |    |
|--------------------------------------------------------------------------------------------------------------|----|
| <b>1. General Information</b> .....                                                                          | 1  |
| <b>2. List of Substrates</b> .....                                                                           | 1  |
| <b>3. Synthesis of Substrates</b> .....                                                                      | 2  |
| <b>3.1 General Procedure for the Synthesis of Substrates 1aa-1aw</b> .....                                   | 2  |
| <b>3.2 General Procedure for the Synthesis of Substrate 4aa-ad</b> .....                                     | 2  |
| <b>3.3 General Procedure for the Synthesis of Substrate 4ba-bd</b> .....                                     | 2  |
| <b>3.4 General Procedure for the Synthesis of 1,4-phenylenebis(methylene) bis(2-isocynoacetate) 2e</b> ..... | 3  |
| <b>4. Optimization Results of the Reaction Conditions</b> .....                                              | 3  |
| <b>5. Synthesis of Products</b> .....                                                                        | 4  |
| <b>6. Characterization Data of Substrates and Products</b> .....                                             | 5  |
| <b>7. X-ray Crystallography of 3aa</b> .....                                                                 | 20 |
| <b>8. Reference :</b> .....                                                                                  | 21 |
| <b>9. Copies of NMR Spectrum</b> .....                                                                       | 21 |

## 1. General Information

NMR spectra were prepared on a Bruker AV 400 MHz ( $^1\text{H}$  NMR at 400 MHz,  $^{13}\text{C}$  NMR at 101 MHz), The  $^1\text{H}$  NMR (400 MHz) chemical shifts and the  $^{13}\text{C}$  NMR (101 MHz) chemical shifts were measured relative to  $\text{CDCl}_3$  as the internal reference. Chemical shifts ( $\delta$ ) are reported in parts per million (ppm) and spin-spin coupling constants ( $J$ ) are given in Hz. The following abbreviations are used to describe multiplicities: singlet (s), doublet (d), doublet of doublets (dd), triplet (t), quartet (q), and multiplet (m). HRMS data were obtained on a Waters LCT Premier<sup>TM</sup> (USA). Melting point (mp) was recorded on micro melting point instrument (SGWX-4A). Column chromatography were performed on silica gel 200-300 mesh.

Unless otherwise noted, all reagents were obtained from commercial suppliers and used without further purification. All the solvents were treated according to general methods.

## 2. List of Substrates

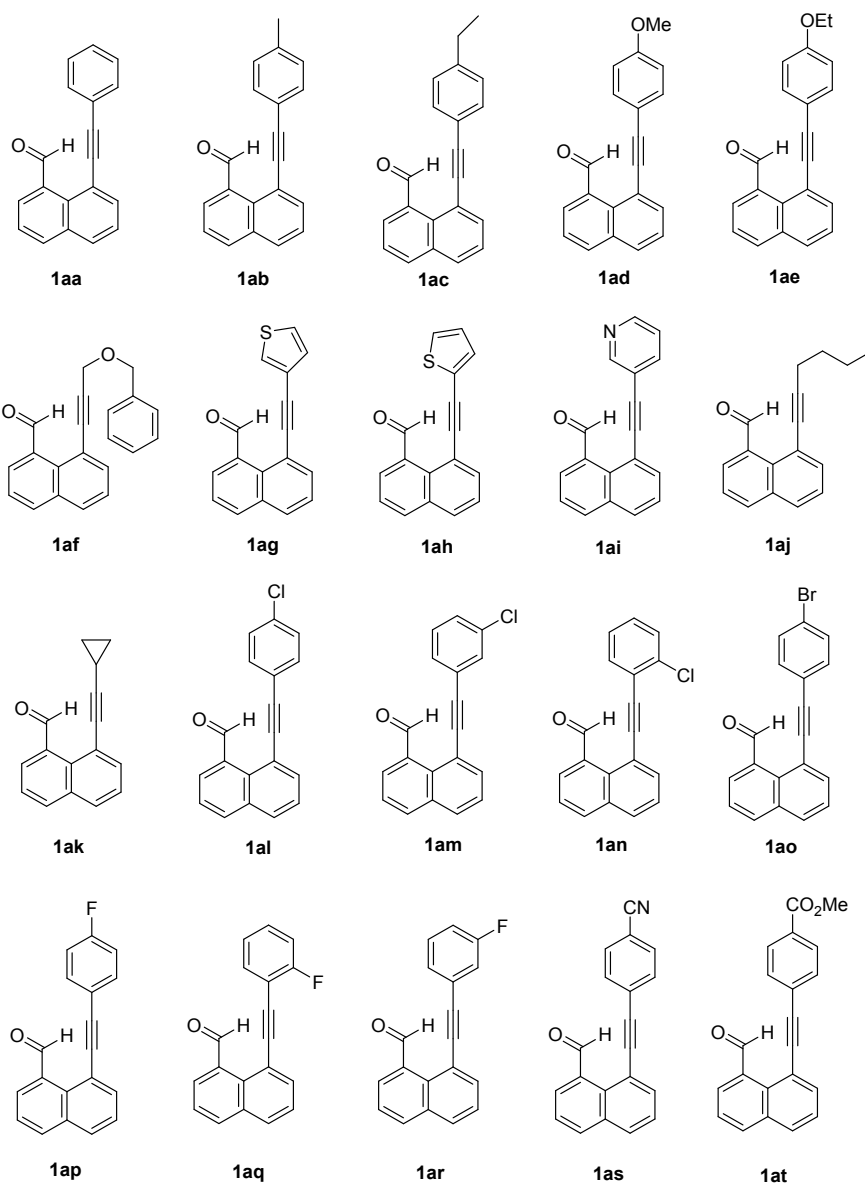

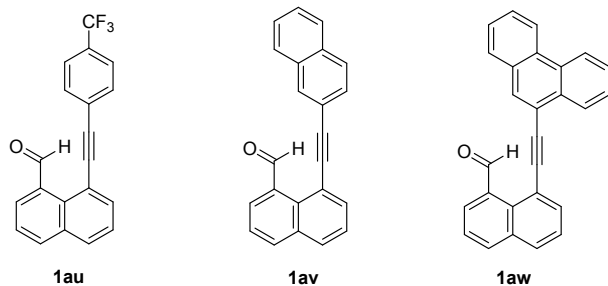

### 3. Synthesis of Substrates

#### 3.1 General Procedure for the Synthesis of Substrates 1aa-1aw

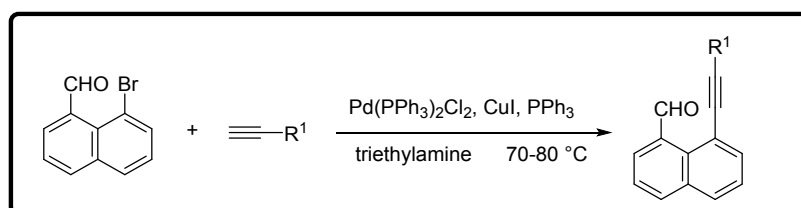

To a solution of the terminal alkyne (3.0 mmol, 1.2 equiv) and 8-bromo-1-naphthaldehyde (587.5 mg, 2.5 mmol, 1.0 equiv) in NEt<sub>3</sub> (20 mL) in a screw-capped Pyrex bottle Pd(PPh<sub>3</sub>)<sub>2</sub>Cl<sub>2</sub> (87.7 mg, 5 mol %), CuI (47.6 mg, 10 mol %) and PPh<sub>3</sub> (65.5 mg, 10 mol %) are added at ambient temperature. The reaction mixture is purged with nitrogen for 5 min. The sealed bottle is heated at 70-80 °C overnight (ca. 10-12 h). After cooling to room temperature, the suspension is filtered through a thick layer of diatomaceous earth, and the diatomaceous earth is rinsed well with EA (40 mL). The solvent of the filtrate is removed under reduced pressure, and the residue is subjected to chromatography on silica gel. Elution with PE/EA affords the coupling product.

#### 3.2 General Procedure for the Synthesis of Substrate 4aa-ad

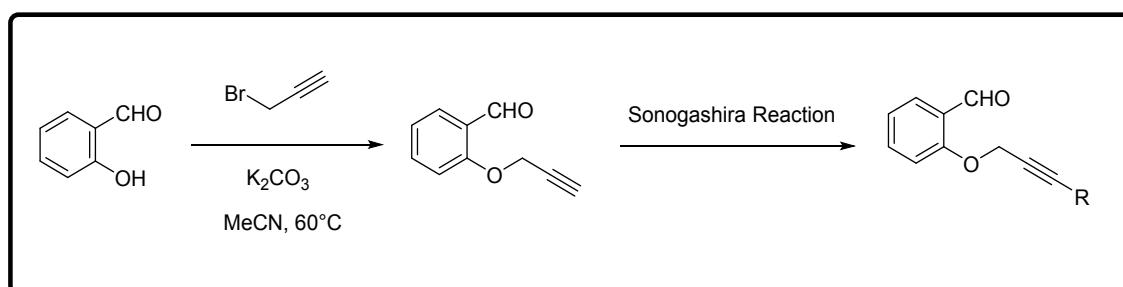

Substrate **4aa-ad** was synthesized using the procedure described in literature and the <sup>1</sup>H and <sup>13</sup>C NMR spectra of **4aa-ad** were consistent with literature<sup>1</sup>. (Muthu Karuppasamy, B. S. Vachan, Perumal Vinoth, Isravel Muthukrishnan, et al., *Org. Lett.* **2019**, *21* (15), 5784-5788).

#### 3.3 General Procedure for the Synthesis of Substrate 4ba-bd

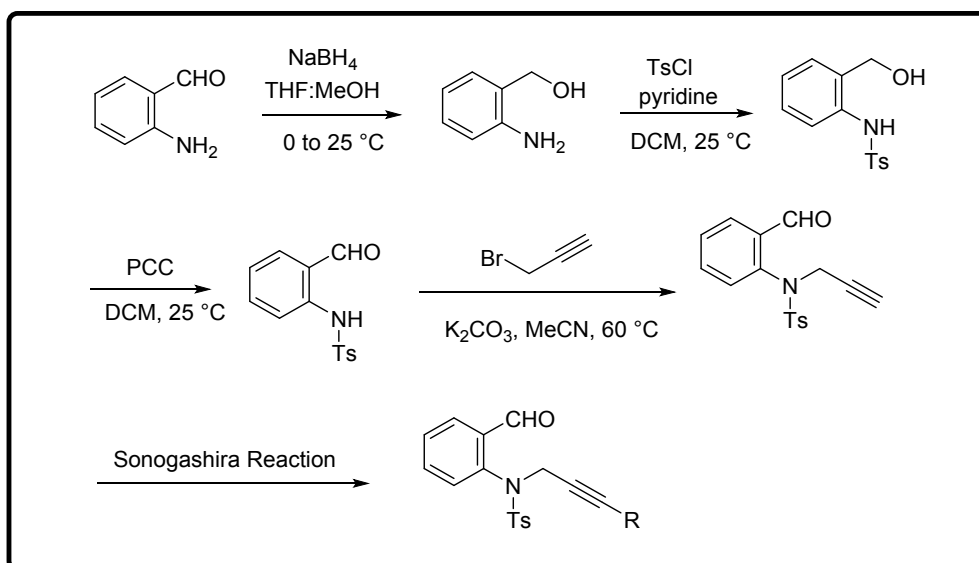

Substrate **4ba-bd** was synthesized using the procedure described in literature and the  $^1\text{H}$  and  $^{13}\text{C}$  NMR spectra of **4ba-bd** were consistent with literature<sup>1</sup> (Muthu Karuppasamy, B. S. Vachan, Perumal Vinoth, Isravel Muthukrishnan, et al., *Org. Lett.* **2019**, *21* (15), 5784-5788).

### 3.4 General Procedure for the Synthesis of 1,4-phenylenebis(methylene) bis(2-isocyanoacetate) **2e**

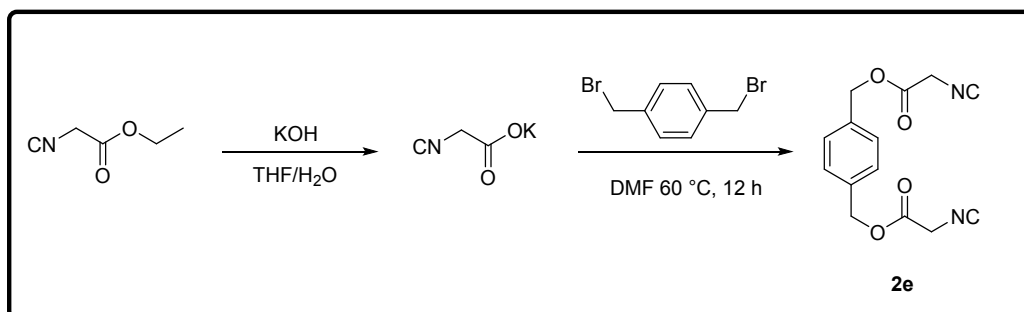

To a solution of the ethyl isocyanoacetate (1.131 g, 10 mmol, 1.0 equiv) in THF (20.0 mL) and water (5.0 mL) was added potassium hydroxide (560.0 mg, 10 mmol, 1.0 equiv), and the resultant mixture was stirred at room temperature for 5 h. The solvent was then removed in vacuum and the resultant salt was used without further purification.

To a 100 mL round-bottom flask were added potassium 2-isocyanoacetate (1.23 g, 10 mmol, 2.2 equiv), 1,4-bis(bromomethyl)benzene (1.18 g, 4.5 mmol, 1.0 equiv) and DMF (30 mL) under nitrogen. The solution was stirred at 60 °C for 12 h, and then the formed precipitates were removed by filtration and washed with ethyl acetate. The filtrate was extracted by EA/water in order to remove DMF. After the organic layer was dried with anhydrous magnesium sulfate, the solvent was removed by a rotary evaporator under reduced pressure, and the crude product was purified by a silica gel column chromatography using PE/EA (1:1 v/v) as eluent. Compounds were prepared by modification of a known procedure<sup>2</sup> (Tianyu Cheng, Yizhao Chen, Anjun Qin, and Ben Zhong Tang, *Macromolecules* **2018**, *51*, 5638–5645)

## 4. Optimization Results of the Reaction Conditions

**Table S1.** Optimization of the Base, Solvent, Catalyst and Temperature<sup>a</sup>

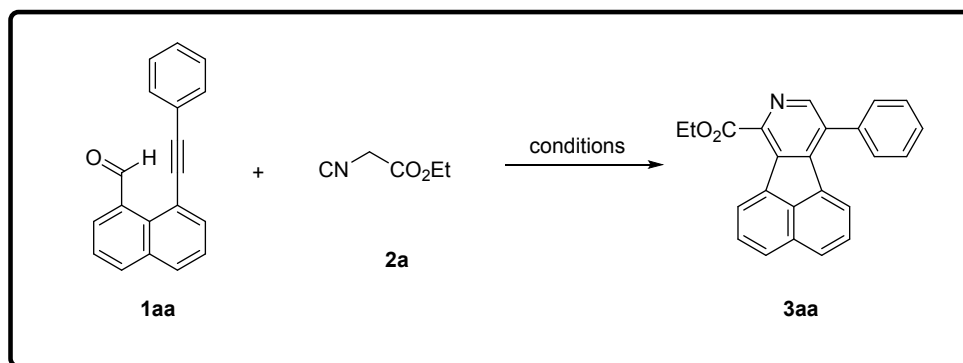

| Entry     | Catalyst                           | Base                                | Solvent              | <i>t</i> (°C) | Yield (%) <sup>b</sup> |
|-----------|------------------------------------|-------------------------------------|----------------------|---------------|------------------------|
| 1         | -                                  | DBU                                 | MeCN                 | 80            | 20                     |
| 2         | -                                  | K <sub>2</sub> CO <sub>3</sub>      | MeCN                 | 80            | 31                     |
| 3         | -                                  | K <sub>3</sub> PO <sub>4</sub>      | MeCN                 | 80            | 27                     |
| 4         | -                                  | KOH                                 | MeCN                 | 80            | 25                     |
| 5         | -                                  | <i>t</i> -BuOLi                     | MeCN                 | 80            | 17                     |
| 6         | -                                  | CsOH                                | MeCN                 | 80            | 23                     |
| 7         | -                                  | Cs <sub>2</sub> CO <sub>3</sub>     | MeCN                 | 80            | 39                     |
| 8         | -                                  | Cs <sub>2</sub> CO <sub>3</sub>     | 1,4-dioxane          | 80            | 14                     |
| 9         | -                                  | Cs <sub>2</sub> CO <sub>3</sub>     | toluene              | 80            | 42                     |
| 10        | -                                  | Cs <sub>2</sub> CO <sub>3</sub>     | DMSO                 | 80            | ND <sup>c</sup>        |
| 11        | -                                  | Cs <sub>2</sub> CO <sub>3</sub>     | DMF                  | 80            | ND <sup>c</sup>        |
| 12        | -                                  | Cs <sub>2</sub> CO <sub>3</sub>     | diethyl ether        | 80            | 38                     |
| 13        | -                                  | Cs <sub>2</sub> CO <sub>3</sub>     | methyl acetate       | 80            | 62                     |
| 14        | -                                  | Cs <sub>2</sub> CO <sub>3</sub>     | ethanol              | 80            | 32                     |
| <b>15</b> | -                                  | <b>Cs<sub>2</sub>CO<sub>3</sub></b> | <b>ethyl acetate</b> | <b>80</b>     | <b>67</b>              |
| 16        | -                                  | Cs <sub>2</sub> CO <sub>3</sub>     | ethyl acetate        | 60            | 29                     |
| 17        | -                                  | Cs <sub>2</sub> CO <sub>3</sub>     | ethyl acetate        | rt            | ND <sup>c</sup>        |
| 18        | -                                  | Cs <sub>2</sub> CO <sub>3</sub>     | ethyl acetate        | 100           | 60                     |
| 19        | AgOTf                              | Cs <sub>2</sub> CO <sub>3</sub>     | ethyl acetate        | 80            | 50                     |
| 20        | Ag <sub>2</sub> CO <sub>3</sub>    | Cs <sub>2</sub> CO <sub>3</sub>     | ethyl acetate        | 80            | 57                     |
| 21        | AgOAc                              | Cs <sub>2</sub> CO <sub>3</sub>     | ethyl acetate        | 80            | 61                     |
| 22        | Zn(OTf) <sub>2</sub>               | Cs <sub>2</sub> CO <sub>3</sub>     | ethyl acetate        | 80            | ND <sup>c</sup>        |
| 23        | CuI                                | Cs <sub>2</sub> CO <sub>3</sub>     | ethyl acetate        | 80            | trace                  |
| 24        | Cu <sub>2</sub> O                  | Cs <sub>2</sub> CO <sub>3</sub>     | ethyl acetate        | 80            | 51                     |
| 25        | PdCl <sub>2</sub>                  | Cs <sub>2</sub> CO <sub>3</sub>     | ethyl acetate        | 80            | trace                  |
| 26        | Pd(OAc) <sub>2</sub>               | Cs <sub>2</sub> CO <sub>3</sub>     | ethyl acetate        | 80            | trace                  |
| 27        | Pd(PPh <sub>3</sub> ) <sub>4</sub> | Cs <sub>2</sub> CO <sub>3</sub>     | ethyl acetate        | 80            | 59                     |

<sup>a</sup> Reagents and reaction conditions: **1a** (0.2 mmol, 1.0 equiv), ethyl isocyanoacetate (0.3 mmol, 1.5 equiv), catalyst (10 mol %), base (0.4 mmol, 2 equiv), solvent (2 mL), 4-6 h. <sup>b</sup> Isolated yields. <sup>c</sup> No desired product was detected.

## 5. Synthesis of Products

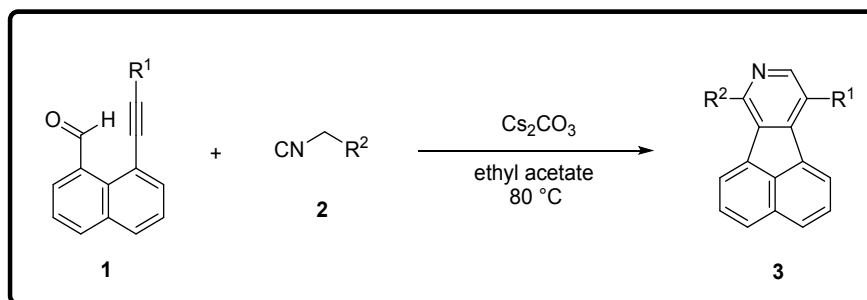

A dry 10 mL Schlenk tube equipped with magnetic stirring bar are charged with substrate (0.2 mmol, 1.0 equiv),  $\text{Cs}_2\text{CO}_3$  (130.3 mg, 0.4 mmol, 2.0 equiv), isocyanide (0.3 mmol, 1.5 equiv) and Ethyl acetate (2 mL). The reaction mixture is stirred at 80 °C for 4-6 h. After cooling to room temperature, the mixture is filtered through a thick layer of diatomaceous earth, and the diatomaceous earth is rinsed well with EA (20 mL). The solvent of the filtrate is removed under reduced pressure, and the residue is subjected to chromatography on silica gel. Elution with PE/EA affords the product.

## 6. Characterization Data of Substrates and Products

### 8-phenylethynyl-1-naphthaldehyde (1aa)

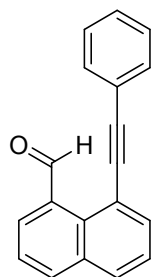

Purification by column chromatography on silica gel (PE/EA = 50/1, v/v) afforded **1aa** as a yellow solid (473.6 mg, 74% yield). mp: 59-60 °C.  $^1\text{H}$  NMR (400 MHz,  $\text{CDCl}_3$ )  $\delta$  11.67 (s, 1H), 8.02 (d,  $J = 8.4$  Hz, 1H), 7.99 (d,  $J = 7.2$  Hz, 1H), 7.93-7.88 (m, 2H), 7.63-7.50 (m, 4H), 7.42-7.37 (m, 3H).  $^{13}\text{C}$  NMR (101 MHz,  $\text{CDCl}_3$ )  $\delta$  193.5, 135.7, 134.1, 134.1, 134.0, 131.2, 131.1, 129.8, 128.8, 128.8, 128.5, 126.0, 125.8, 122.6, 118.6, 95.1, 90.9. HRMS (ESI)  $m/z$ :  $[\text{M} + \text{H}]^+$  Calcd for  $\text{C}_{19}\text{H}_{13}\text{O}$  257.0961; Found 257.0959.

### 8-(p-tolyethynyl)-1-naphthaldehyde (1ab)

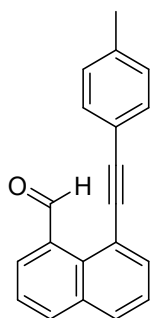

Purification by column chromatography on silica gel (PE/EA = 50/1, v/v) afforded **1ab** as a yellow solid (560.5 mg, 83% yield). mp: 85-86 °C.  $^1\text{H}$  NMR (400 MHz,  $\text{CDCl}_3$ )  $\delta$  11.67 (s, 1H), 8.01 (d,  $J = 8.4$  Hz, 1H), 7.98 (d,  $J = 7.2$  Hz, 1H), 7.88 (d,  $J = 7.2$  Hz, 2H), 7.59-7.47 (m, 4H), 7.20 (d,  $J = 8.0$  Hz, 2H), 2.39 (s, 3H).  $^{13}\text{C}$  NMR (101 MHz,  $\text{CDCl}_3$ )  $\delta$  193.5, 139.1, 135.8, 134.1, 134.0, 133.9, 131.1, 131.1, 129.6, 129.3, 128.7, 126.0, 125.7, 119.6, 118.8, 95.4, 90.3, 21.6. HRMS (ESI)  $m/z$ :  $[\text{M} + \text{Na}]^+$  Calcd for  $\text{C}_{20}\text{H}_{14}\text{ONa}$  293.0937; Found 293.0937.

### 8-((4-ethylphenyl) ethynyl)-1-naphthaldehyde (1ac)

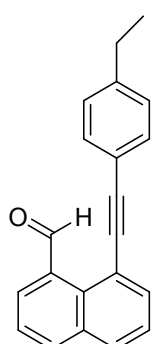

Purification by column chromatography on silica gel (PE/EA = 50/1, v/v) afforded **1ac** as a yellow oil (518.5 mg, 73% yield).  $^1\text{H}$  NMR (400 MHz,  $\text{CDCl}_3$ )  $\delta$  11.68 (s, 1H), 8.03 (d,  $J = 8.1$  Hz, 1H), 7.99 (d,  $J = 7.2$  Hz, 1H), 7.90 (d,  $J = 7.6$  Hz, 2H),

7.58 (t,  $J = 7.6$  Hz, 1H), 7.53-7.50 (m, 3H), 7.23 (d,  $J = 8.0$  Hz, 2H), 2.68 (q,  $J = 7.6$  Hz, 2H), 1.26 (t,  $J = 7.6$  Hz, 3H).  $^{13}\text{C}$  NMR (101 MHz,  $\text{CDCl}_3$ )  $\delta$  193.6, 145.4, 135.8, 134.1, 134.0, 133.9, 131.2, 131.1, 129.6, 128.7, 128.1, 125.9, 125.7, 119.8, 118.8, 95.4, 90.3, 28.9, 15.3. HRMS (ESI)  $m/z$ :  $[\text{M} + \text{Na}]^+$  Calcd for  $\text{C}_{21}\text{H}_{16}\text{ONa}$  307.1093; Found 307.1090.

#### 8-((4-methoxyphenyl) ethynyl)-1-naphthaldehyde (**1ad**)

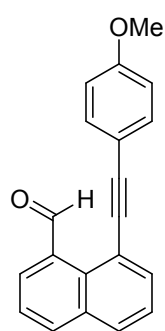

Purification by column chromatography on silica gel (PE/EA = 30/1, v/v) afforded **1ad** as a white solid (343.3 mg, 48% yield). mp: 101-102 °C.  $^1\text{H}$  NMR (400 MHz,  $\text{CDCl}_3$ )  $\delta$  11.66 (s, 1H), 8.01 (d,  $J = 8.0$  Hz, 1H), 7.96 (d,  $J = 7.2$  Hz, 1H), 7.86 (d,  $J = 7.6$  Hz, 2H), 7.57-7.48 (m, 4H), 6.91 (d,  $J = 8.4$  Hz, 2H), 3.83 (s, 3H).  $^{13}\text{C}$  NMR (101 MHz,  $\text{CDCl}_3$ )  $\delta$  193.6, 160.1, 135.9, 134.1, 134.0, 133.6, 132.7, 131.1, 129.4, 128.6, 126.0, 125.7, 119.0, 114.7, 114.2, 95.3, 89.8, 55.3. HRMS (ESI)  $m/z$ :  $[\text{M} + \text{Na}]^+$  Calcd for  $\text{C}_{20}\text{H}_{14}\text{O}_2\text{Na}$  309.0886; Found 309.0882.

#### 8-((4-ethoxyphenyl)ethynyl)-1-naphthaldehyde (**1ae**)

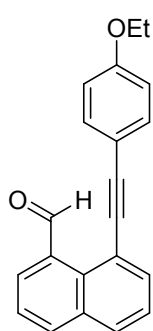

Purification by column chromatography on silica gel (PE/EA = 50/1, v/v) afforded **1ae** as a white solid (637.7 mg, 85% yield). mp: 111-112 °C.  $^1\text{H}$  NMR (400 MHz,  $\text{CDCl}_3$ )  $\delta$  11.67 (s, 1H), 8.02 (d,  $J = 8.0$  Hz, 1H), 7.97 (d,  $J = 7.2$  Hz, 1H), 7.87 (d,  $J = 6.4$  Hz, 2H), 7.60-7.48 (m, 4H), 6.90 (d,  $J = 8.8$  Hz, 2H), 4.06 (q,  $J = 7.2$  Hz, 2H), 1.43 (t,  $J = 6.8$  Hz, 3H).  $^{13}\text{C}$  NMR (101 MHz,  $\text{CDCl}_3$ )  $\delta$  193.7, 159.5, 135.8, 134.1, 134.0, 133.6, 132.7, 131.1, 129.4, 128.6, 126.0, 125.7, 119.0, 114.7, 114.5, 95.4, 89.7, 63.5, 14.7. HRMS (ESI)  $m/z$ :  $[\text{M} + \text{Na}]^+$  Calcd for  $\text{C}_{21}\text{H}_{16}\text{O}_2\text{Na}$  323.1043; Found 323.1038.

#### 8-(3-(benzyloxy)prop-1-yn-1-yl)-1-naphthaldehyde (**1af**)

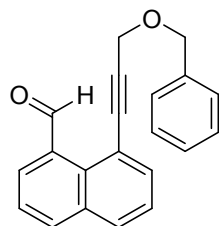

Purification by column chromatography on silica gel (PE/EA = 50/1, v/v) afforded **1af** as a brown oil (540.2 mg, 72% yield).  $^1\text{H}$  NMR (400 MHz,  $\text{CDCl}_3$ )  $\delta$  11.61 (s, 1H), 8.03-7.99 (m, 2H), 7.91 (d,  $J = 8.0$  Hz, 1H), 7.86 (d,  $J = 7.2$  Hz, 1H), 7.56 (t,  $J = 7.6$  Hz, 1H), 7.52-7.48 (m, 1H), 7.44 (d,  $J = 7.2$  Hz, 2H), 7.39 (t,  $J = 7.6$  Hz, 2H), 7.32 (t,  $J = 7.2$  Hz, 1H), 4.71 (s, 2H), 4.50 (s, 2H).  $^{13}\text{C}$  NMR (101 MHz,  $\text{CDCl}_3$ )  $\delta$  193.2, 137.4, 135.4, 135.0, 134.3, 134.0, 131.2, 130.3, 129.0, 128.5, 128.2, 128.0, 125.9, 125.8, 117.8, 91.5, 87.7, 72.1, 58.1. HRMS (ESI)  $m/z$ :  $[\text{M} + \text{Na}]^+$  Calcd for  $\text{C}_{21}\text{H}_{16}\text{O}_2\text{Na}$  323.1043; Found 323.1040.

#### 8-(thiophen-3-ylethynyl)-1-naphthaldehyde (**1ag**)

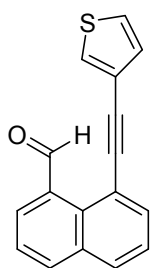

Purification by column chromatography on silica gel (PE/EA = 20/1, v/v) afforded **1ag** as a light brown solid (524.0 mg, 80% yield). mp: 78-79 °C.  $^1\text{H}$  NMR (400 MHz,  $\text{CDCl}_3$ )  $\delta$  11.62 (s, 1H), 8.02 (d,  $J = 8.4$  Hz, 1H), 7.97 (d,  $J = 7.2$  Hz, 1H), 7.89 (t,  $J = 8.4$  Hz, 2H), 7.64 (s, 1H), 7.58 (d,  $J = 7.6$  Hz, 1H), 7.56-7.49 (m, 1H), 7.36-7.33 (m, 1H), 7.28 (d,  $J = 4.8$  Hz, 1H).  $^{13}\text{C}$  NMR (101 MHz,  $\text{CDCl}_3$ )  $\delta$  193.6, 135.8, 134.1, 134.0, 133.7, 131.1, 129.7, 129.3, 129.2, 128.7, 126.0, 125.8, 125.7, 121.6, 118.6, 90.6, 90.4. HRMS (ESI)  $m/z$ :  $[\text{M} + \text{Na}]^+$  Calcd for  $\text{C}_{17}\text{H}_{10}\text{OSNa}$  285.0345; Found 285.0343.



### 8-(thiophen-2-ylethynyl)-1-naphthaldehyde (**1ah**)

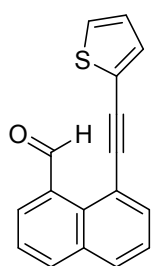

Purification by column chromatography on silica gel (PE/EA = 30/1, v/v) afforded **1ah** as a light brown solid (478.2 mg, 73% yield). mp:88-89 °C. <sup>1</sup>H NMR (400 MHz, CDCl<sub>3</sub>) δ 11.58 (s, 1H), 8.02 (d, *J* = 8.4 Hz, 1H), 7.99 (d, *J* = 7.2 Hz, 1H), 7.90 (d, *J* = 7.6 Hz, 1H), 7.87 (d, *J* = 7.2 Hz, 1H), 7.57 (t, *J* = 7.6 Hz, 1H), 7.54-7.49 (m, 1H), 7.39 (d, *J* = 3.6 Hz, 1H), 7.36 (d, *J* = 6.0 Hz, 1H), 7.06 (dd, *J* = 5.2, 3.6 Hz, 1H). <sup>13</sup>C NMR (101 MHz, CDCl<sub>3</sub>) δ 193.1, 135.6, 134.2, 134.0, 133.8, 132.3, 130.83, 130.0, 128.8, 128.0, 127.3, 125.1, 125.8, 122.4, 118.2, 94.4, 88.6. HRMS (ESI) *m/z*: [M + Na]<sup>+</sup> Calcd for C<sub>17</sub>H<sub>10</sub>OSNa 285.0345; Found 285.0341.

### 8-(pyridin-3-ylethynyl)-1-naphthaldehyde (**1ai**)

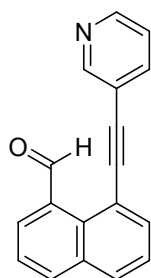

Purification by column chromatography on silica gel (PE/EA = 3/1, v/v) afforded **1ai** as a white solid (462.8 mg, 72% yield). mp:91-92 °C. <sup>1</sup>H NMR (400 MHz, CDCl<sub>3</sub>) δ 11.56 (s, 1H), 8.79 (s, 1H), 8.56 (d, *J* = 4.4 Hz, 1H), 8.00 (d, *J* = 8.0 Hz, 1H), 7.94 (d, *J* = 6.0 Hz, 1H), 7.91-7.88 (m, 2H), 7.85 (d, *J* = 7.6 Hz, 1H), 7.57-7.49 (m, 2H), 7.31-7.28 (m, 1H). <sup>13</sup>C NMR (101 MHz, CDCl<sub>3</sub>) δ 193.1, 151.7, 149.0, 138.0, 135.5, 134.4, 134.2, 133.9, 130.9, 130.4, 128.9, 125.9, 125.9, 123.2, 119.8, 117.7, 94.0, 91.5. HRMS (ESI) *m/z*: [M + H]<sup>+</sup> Calcd for C<sub>18</sub>H<sub>12</sub>NO 258.0913; Found 258.0912.

### 8-(hex-1-yn-1-yl)-1-naphthaldehyde (**1aj**)

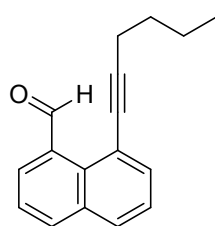

Purification by column chromatography on silica gel (PE/EA = 50/1, v/v) afforded **1j** as a yellowish liquid (265.6 mg, 45% yield). <sup>1</sup>H NMR (400 MHz, CDCl<sub>3</sub>) δ 11.59 (s, 1H), 7.98 (d, *J* = 8.4 Hz, 1H), 7.94 (d, *J* = 7.2 Hz, 1H), 7.83 (d, *J* = 8.4 Hz, 1H), 7.75 (d, *J* = 7.2 Hz, 1H), 7.52 (t, *J* = 7.6 Hz, 1H), 7.45 (t, *J* = 7.6 Hz, 1H), 2.50 (t, *J* = 7.2 Hz, 2H), 1.69-1.61 (m, 2H), 1.54-1.45 (m, 2H), 0.97 (t, *J* = 7.2 Hz, 3H). <sup>13</sup>C NMR (101 MHz, CDCl<sub>3</sub>) δ 193.5, 135.7, 134.1, 134.0, 133.9, 131.3, 129.0, 128.5, 125.9, 125.5, 119.4, 97.0, 82.2, 30.3, 22.2, 19.5, 13.6. HRMS (ESI) *m/z*: [M + H]<sup>+</sup> Calcd for C<sub>17</sub>H<sub>17</sub>O 237.1274; Found 237.1271.

### 8-(cyclopropylethynyl)-1-naphthaldehyde (**1ak**)

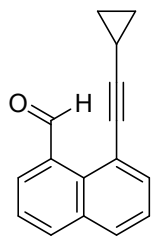

Purification by column chromatography on silica gel (PE/EA = 40/1, v/v) afforded **1k** as a yellow liquid (341.2 mg, 62% yield). <sup>1</sup>H NMR (400 MHz, CDCl<sub>3</sub>) δ 11.51 (s, 1H), 7.97 (d, *J* = 8.0 Hz, 1H), 7.90 (d, *J* = 7.2 Hz, 1H), 7.81 (d, *J* = 8.0 Hz, 1H), 7.73 (d, *J* = 7.2 Hz, 1H), 7.51 (t, *J* = 7.6 Hz, 1H), 7.43 (t, *J* = 7.6 Hz, 1H), 1.57-1.50 (m, 1H), 0.92-0.90 (m, 4H). <sup>13</sup>C NMR (101 MHz, CDCl<sub>3</sub>) δ 193.5, 135.8, 134.0, 133.8, 131.3, 128.9, 128.4, 125.8, 125.5, 119.3, 99.7, 8.3, 0.6. HRMS (ESI) *m/z*: [M + H]<sup>+</sup> Calcd for C<sub>16</sub>H<sub>13</sub>O 221.0961; Found 221.0957.

### 8-((4-chlorophenyl)ethynyl)-1-naphthaldehyde (**1al**)

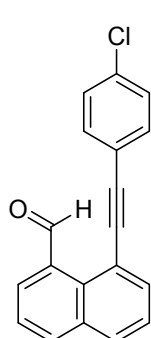

Purification by column chromatography on silica gel (PE/EA = 30/1, v/v) afforded **1al** as a yellow solid (565.5 mg, 78% yield). mp:121-122 °C. <sup>1</sup>H NMR (400 MHz, CDCl<sub>3</sub>) δ 11.59 (s, 1H), 8.04-7.99 (m, 1H), 7.99-7.94 (m, 1H), 7.93-7.85 (m, 2H), 7.60-7.48 (m, 4H), 7.37-7.32 (m, 2H). <sup>13</sup>C NMR (101 MHz, CDCl<sub>3</sub>) δ 193.4, 135.7, 134.9, 134.1, 134.1, 134.0, 132.4, 131.0, 130.1, 128.9, 128.8, 126.0, 125.8, 121.1, 118.2, 93.9, 91.8. HRMS (ESI) *m/z*: [M + H]<sup>+</sup> Calcd for C<sub>19</sub>H<sub>12</sub>ClO 291.0571; Found 291.0571.

### 8-((3-chlorophenyl)ethynyl)-1-naphthaldehyde (**1am**)

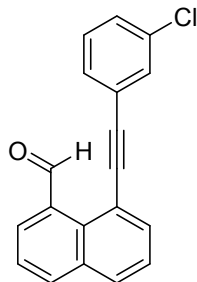

Purification by column chromatography on silica gel (PE/EA = 30/1, v/v) afforded **1am** as a yellow solid (674.3 mg, 93% yield). mp:128-129 °C. <sup>1</sup>H NMR (400 MHz, CDCl<sub>3</sub>) δ 11.60 (s, 1H), 8.04 (d, *J* = 8.4 Hz, 1H), 7.99 (dd, *J* = 7.2, 1.2 Hz, 1H), 7.95-7.89 (m, 2H), 7.62-7.52 (m, 3H), 7.47 (dt, *J* = 7.2, 1.6 Hz, 1H), 7.35-7.29 (m, 2H). <sup>13</sup>C NMR (101 MHz, CDCl<sub>3</sub>) δ 193.4, 135.6, 134.4, 134.3, 134.2, 134.0, 131.1, 131.0, 130.3, 129.8, 129.4, 129.1, 128.9, 126.0, 125.9, 124.3, 118.1, 93.5, 91.9. HRMS (ESI) *m/z*: [M + H]<sup>+</sup> Calcd for C<sub>19</sub>H<sub>12</sub>ClO 291.0571; Found 291.0568.

### 8-((2-chlorophenyl)ethynyl)-1-naphthaldehyde (**1an**)

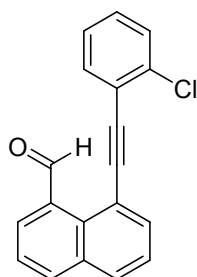

Purification by column chromatography on silica gel (PE/EA = 30/1, v/v) afforded **1an** as a yellow solid (551.0 mg, 76% yield). mp:118-119 °C. <sup>1</sup>H NMR (400 MHz, CDCl<sub>3</sub>) δ 11.74 (s, 1H), 8.06 (s, 1H), 8.04 (s, 1H), 7.98 (d, *J* = 7.2 Hz, 1H), 7.94 (d, *J* = 8.4 Hz, 1H), 7.64-7.61 (m, 1H), 7.59-7.53 (m, 2H), 7.47-7.43 (m, 1H), 7.31-7.27 (m, 2H). <sup>13</sup>C NMR (101 MHz, CDCl<sub>3</sub>) δ 193.4, 135.9, 135.3, 135.0, 134.4, 134.1, 133.0, 130.9, 130.4, 129.8, 129.4, 129.0, 126.7, 125.9, 125.9, 122.7, 118.1, 95.5, 91.9. HRMS (ESI) *m/z*: [M + Na]<sup>+</sup> Calcd for C<sub>19</sub>H<sub>11</sub>ClONa 313.0391; Found 313.0387.

### 8-((4-bromophenyl)ethynyl)-1-naphthaldehyde (**1ao**)

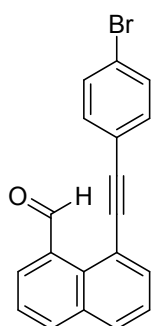

Purification by column chromatography on silica gel (PE/EA = 20/1, v/v) afforded **1ao** as a yellow solid (626.3 mg, 75% yield). mp:104-105 °C. <sup>1</sup>H NMR (400 MHz, CDCl<sub>3</sub>) δ 11.60 (s, 1H), 8.04 (dd, *J* = 8.4, 1.2 Hz, 1H), 7.98 (dd, *J* = 7.2, 1.2 Hz, 1H), 7.93 (d, *J* = 8.0 Hz, 1H), 7.90 (dd, *J* = 7.2, 1.2 Hz, 1H), 7.61-7.55 (m, 1H), 7.52 (dt, *J* = 8.8, 2.0 Hz, 3H), 7.45 (d, *J* = 2.0 Hz, 1H), 7.44 (d, *J* = 2.0 Hz, 1H). <sup>13</sup>C NMR (101 MHz, CDCl<sub>3</sub>) δ 193.5, 135.7, 134.2, 134.1, 134.0, 132.6, 131.8, 131.0, 130.1, 128.9, 126.0, 125.9, 123.2, 121.5, 118.3, 93.9, 91.9. HRMS (ESI) *m/z*: [M + H]<sup>+</sup> Calcd for C<sub>19</sub>H<sub>12</sub>BrO 335.0066; Found 335.0067.

### 8-((4-fluorophenyl)ethynyl)-1-naphthaldehyde (**1ap**)

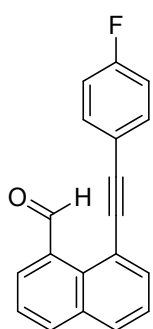

Purification by column chromatography on silica gel (PE/EA = 30/1, v/v) afforded **1ap** as a white solid (603.0 mg, 88% yield). mp:83-84 °C. <sup>1</sup>H NMR (400 MHz, CDCl<sub>3</sub>) δ 11.62 (s, 1H), 8.06-8.01 (m, 1H), 7.97 (dd, *J* = 7.2, 1.2 Hz, 1H), 7.92-7.88 (m, 2H), 7.61-7.50 (m, 4H), 7.08 (t, *J* = 8.8 Hz, 2H). <sup>13</sup>C NMR (101 MHz, CDCl<sub>3</sub>) δ 193.5, 162.9 (C-F, <sup>1</sup>*J*<sub>C-F</sub> = 251.5 Hz), 135.8, 134.1, 134.1, 134.0, 133.2 (C-F, <sup>3</sup>*J*<sub>C-F</sub> = 8.1 Hz), 131.1, 129.9, 128.8, 126.0, 125.8, 118.8 (C-F, <sup>4</sup>*J*<sub>C-F</sub> = 4.0 Hz), 118.5, 116.0 (C-F, <sup>2</sup>*J*<sub>C-F</sub> = 22.2 Hz), 94.0, 90.6. HRMS (ESI) *m/z*: [M + Na]<sup>+</sup> Calcd for C<sub>19</sub>H<sub>11</sub>FONa 297.0686; Found 297.0681.

### 8-((2-fluorophenyl)ethynyl)-1-naphthaldehyde (**1aq**)

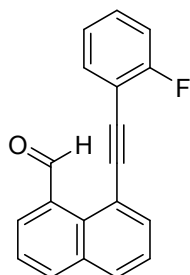

Purification by column chromatography on silica gel (PE/EA = 30/1, v/v) afforded **1aq** as a yellow solid (541.3 mg, 79% yield). mp:86-87 °C. <sup>1</sup>H NMR

(400 MHz, CDCl<sub>3</sub>)  $\delta$  11.70 (s, 1H), 8.03 (d,  $J$  = 7.6 Hz, 2H), 7.92 (t,  $J$  = 8.0 Hz, 2H), 7.60-7.55 (m, 3H), 7.35 (q,  $J$  = 7.2 Hz, 1H), 7.11-7.18 (m, 2H). <sup>13</sup>C NMR (101 MHz, CDCl<sub>3</sub>)  $\delta$  193.3, 162.7 (C-F, <sup>1</sup> $J_{C-F}$  = 252.5 Hz), 135.4, 134.7, 134.3, 134.0, 133.0, 130.9, 130.5 (C-F, <sup>3</sup> $J_{C-F}$  = 7.1 Hz), 130.3, 129.0, 125.9 (C-F, <sup>3</sup> $J_{C-F}$  = 6.1 Hz), 124.2 (C-F, <sup>4</sup> $J_{C-F}$  = 3.0 Hz), 118.1, 115.6 (C-F, <sup>2</sup> $J_{C-F}$  = 21.2 Hz), 111.3 (C-F, <sup>3</sup> $J_{C-F}$  = 16.2 Hz), 95.6 (C-F, <sup>4</sup> $J_{C-F}$  = 3.0 Hz), 88.6. HRMS (ESI)  $m/z$ : [M + H]<sup>+</sup> Calcd for C<sub>19</sub>H<sub>12</sub>FO 275.0867; Found 275.0866.

#### 8-((3-fluorophenyl)ethynyl)-1-naphthaldehyde (1ar)

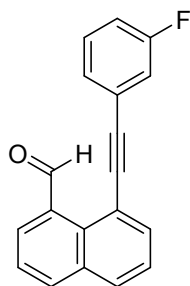

Purification by column chromatography on silica gel (PE/EA = 30/1, v/v) afforded **1ar** as a yellow solid (603.0 mg, 88% yield). mp:82-83 °C. <sup>1</sup>H NMR (400 MHz, CDCl<sub>3</sub>)  $\delta$  11.58 (s, 1H), 8.03-7.93 (m, 2H), 7.84-7.88 (m, 2H), 7.59-7.46 (m, 2H), 7.35-7.31 (m, 2H), 7.26 (d,  $J$  = 9.2 Hz, 1H), 7.06 (t,  $J$  = 8.0 Hz, 1H). <sup>13</sup>C NMR (101 MHz, CDCl<sub>3</sub>)  $\delta$  193.3, 162.4 (C-F, <sup>1</sup> $J_{C-F}$  = 247.5 Hz), 135.6, 134.3, 134.1, 134.0, 131.0, 130.2, 130.2, 130.1, 128.8, 127.1 (C-F, <sup>4</sup> $J_{C-F}$  = 3.0 Hz), 125.9 (C-F, <sup>3</sup> $J_{C-F}$  = 9.1 Hz), 125.9 (C-F, <sup>3</sup> $J_{C-F}$  = 9.1 Hz), 118.0 (C-F, <sup>2</sup> $J_{C-F}$  = 22.2 Hz), 117.8, 116.1 (C-F, <sup>2</sup> $J_{C-F}$  = 22.2 Hz), 93.6 (C-F, <sup>4</sup> $J_{C-F}$  = 4.0 Hz), 91.7.

HRMS (ESI)  $m/z$ : [M + H]<sup>+</sup> Calcd for C<sub>19</sub>H<sub>12</sub>FO 275.0867; Found 275.0864.

#### 4-((8-formylnaphthalen-1-yl)ethynyl)benzonitrile (1as)

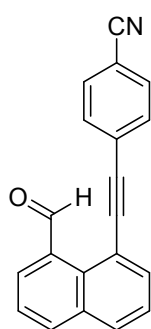

Purification by column chromatography on silica gel (PE/EA = 10/1, v/v) afforded **1as** as a yellow oil (597.3 mg, 85% yield). mp:148-149 °C. <sup>1</sup>H NMR (400 MHz, CDCl<sub>3</sub>)  $\delta$  11.55 (s, 1H), 8.06 (d,  $J$  = 8.4 Hz, 1H), 7.99-7.96 (m, 2H), 7.93 (d,  $J$  = 7.2 Hz, 1H), 7.65 (s, 4H), 7.62 (d,  $J$  = 8.0 Hz, 1H), 7.59-7.54 (m, 1H). <sup>13</sup>C NMR (101 MHz, CDCl<sub>3</sub>)  $\delta$  193.3, 135.6, 134.6, 134.3, 134.0, 132.2, 131.6, 131.0, 130.9, 129.1, 127.4, 126.0, 126.1, 118.4, 117.5, 112.0, 94.9, 93.1. HRMS (ESI)  $m/z$ : [M + H]<sup>+</sup> Calcd for C<sub>20</sub>H<sub>12</sub>NO 282.0913; Found 282.0910.

#### methyl 4-((8-formylnaphthalen-1-yl)ethynyl)benzoate (1at)

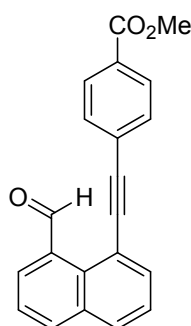

Purification by column chromatography on silica gel (PE/EA/DCM = 10/1/1, v/v/v) afforded **1at** as a white solid (628.2 mg, 80% yield). mp:223-224 °C. <sup>1</sup>H NMR (400 MHz, CDCl<sub>3</sub>)  $\delta$  11.63 (s, 1H), 8.06 (d,  $J$  = 8.4 Hz, 3H), 8.00 (dd,  $J$  = 7.2, 1.2 Hz, 1H), 7.97-7.92 (m, 2H), 7.66-7.65 (m, 1H), 7.64-7.63 (m, 1H), 7.60 (t,  $J$  = 7.6 Hz, 1H), 7.56 (t,  $J$  = 6.8 Hz, 1H), 3.94 (s, 3H). <sup>13</sup>C NMR (101 MHz, CDCl<sub>3</sub>)  $\delta$  193.4, 166.5, 135.67, 134.5, 134.2, 134.0, 131.1, 131.1, 130.4, 130.0, 129.7, 129.0, 127.2, 126.0, 125.9, 118.0, 94.2, 93.6, 52.3. HRMS (ESI)  $m/z$ : [M + Na]<sup>+</sup> Calcd for C<sub>21</sub>H<sub>14</sub>O<sub>3</sub>Na 337.0835; Found 337.0827.

#### 8-((4-(trifluoromethyl)phenyl)ethynyl)-1-naphthaldehyde (1au)

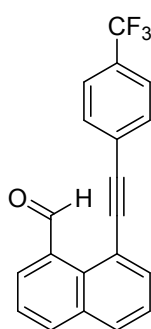

Purification by column chromatography on silica gel (PE/EA = 30/1, v/v) afforded **1au** as a white solid (380.8 mg, 47% yield). mp:82-83 °C. <sup>1</sup>H NMR (400 MHz, CDCl<sub>3</sub>)  $\delta$  11.60 (s, 1H), 8.05 (d,  $J$  = 8.4 Hz, 1H), 7.99 (d,  $J$  = 7.2 Hz, 1H), 7.94 (t,  $J$  = 8.0 Hz, 2H), 7.69 (d,  $J$  = 8.0 Hz, 2H), 7.64 (d,  $J$  = 8.4 Hz, 2H), 7.61-7.53 (m, 2H). <sup>13</sup>C NMR (101 MHz, CDCl<sub>3</sub>)  $\delta$  193.4, 135.6, 134.5, 134.2, 134.0, 131.4, 131.1,

130.5, 130.2, 129.0, 126.4 (C-F,  $^4J_{C-F} = 2.0$  Hz), 126.0 (C-F,  $^4J_{C-F} = 3.0$  Hz), 125.5 (C-F,  $^4J_{C-F} = 4.0$  Hz), 125.2, 122.5, 117.9, 93.4, 93.1. HRMS (ESI) m/z:  $[M + H]^+$  Calcd for  $C_{20}H_{12}F_3O$  325.0835; Found 325.0833.

#### 8-(naphthalen-2-ylethynyl)-1-naphthaldehyde (**1av**)

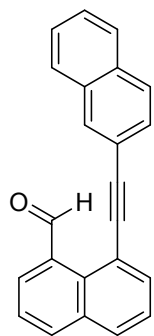

Purification by column chromatography on silica gel (PE/EA = 40/1, v/v) afforded **1av** as a yellow solid (329.1 mg, 43% yield). mp: 102-103 °C.  $^1H$  NMR (400 MHz,  $CDCl_3$ )  $\delta$  11.75 (s, 1H), 8.12 (s, 1H), 8.06 (d,  $J = 8.0$  Hz, 1H), 8.02 (dd,  $J = 7.2, 1.2$  Hz, 1H), 7.97 (d,  $J = 7.2$  Hz, 1H), 7.93 (d,  $J = 8.0$  Hz, 1H), 7.89-7.83 (m, 3H), 7.65 (dd,  $J = 8.4, 1.6$  Hz, 1H), 7.61 (d,  $J = 7.6$  Hz, 1H), 7.57 (d,  $J = 8.0$  Hz, 1H), 7.55-7.50 (m, 2H).  $^{13}C$  NMR (101 MHz,  $CDCl_3$ )  $\delta$  193.6, 135.8, 134.2, 134.1, 133.1, 133.0, 131.3, 131.1, 129.9, 128.8, 128.2, 128.0, 127.8, 127.7, 126.9, 126.6, 126.0, 125.8, 119.9, 118.7, 95.6, 91.2. HRMS (ESI) m/z:  $[M + Na]^+$  Calcd for  $C_{23}H_{14}ONa$  329.0937; Found 329.0933.

#### 8-(phenanthren-9-ylethynyl)-1-naphthaldehyde (**1aw**)

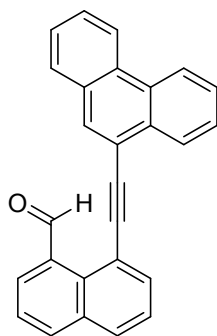

Purification by column chromatography on silica gel (PE/EA = 30/1, v/v) afforded **1aw** as a white solid (543.1 mg, 61% yield). mp: 161-162 °C.  $^1H$  NMR (400 MHz,  $CDCl_3$ )  $\delta$  11.83 (s, 1H), 8.74-8.70 (m, 1H), 8.67 (d,  $J = 8.4$  Hz, 1H), 8.53-8.50 (m, 1H), 8.16 (s, 1H), 8.11-8.05 (m, 3H), 7.95 (t,  $J = 8.0$  Hz, 2H), 7.75-7.71 (m, 2H), 7.68 (d,  $J = 6.8$  Hz, 1H), 7.65-7.57 (m, 3H).  $^{13}C$  NMR (101 MHz,  $CDCl_3$ )  $\delta$  193.5, 135.7, 134.5, 134.3, 134.1, 132.1, 131.2, 131.1, 130.9, 130.4, 130.1, 130.0, 128.9, 128.9, 127.7, 127.2, 127.0, 126.7, 126.0, 125.9, 122.9, 122.6, 119.0, 118.7, 95.1, 93.7. HRMS (ESI) m/z:  $[M + Na]^+$  Calcd for  $C_{27}H_{16}ONa$  379.1093; Found 379.1091.

#### 1,4-phenylenebis(methylene) bis(2-isocynoacetate) (**2e**)

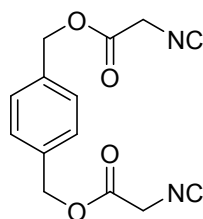

Purification by column chromatography on silica gel (PE/EA = 1/1, v/v) afforded **2e** as a white solid (517.0 mg, 38% yield).  $^1H$  NMR (400 MHz,  $CDCl_3$ )  $\delta$  7.39 (s, 4H), 5.24 (s, 4H), 4.26 (s, 4H).  $^{13}C$  NMR (101 MHz,  $CDCl_3$ )  $\delta$  163.8, 161.5, 135.1, 129.0, 77.4, 77.1, 76.8, 67.8, 43.5. HRMS (ESI) m/z:  $[M + Na]^+$  Calcd for  $C_{14}H_{12}N_2O_4$  295.0689; Found 295.0689.

#### ethyl 10-phenylacenaphtho[1,2-c]pyridine-7-carboxylate (**3aa**)

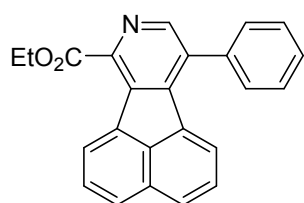

Purification by column chromatography on silica gel (PE/EA = 10/1, v/v) afforded **3aa** as a white solid (47.1 mg, 67% yield). mp: 115-116 °C.  $^1H$  NMR (400 MHz,  $CDCl_3$ )  $\delta$  8.89 (d,  $J = 7.2$  Hz, 1H), 8.60 (s, 1H), 7.94-7.88 (m, 2H), 7.74-7.70 (m, 1H), 7.62-7.54 (m, 5H), 7.42-7.40 (m, 2H), 4.67 (q,  $J = 7.2$  Hz, 2H), 1.57 (t,  $J = 7.2$  Hz, 3H).  $^{13}C$  NMR (101 MHz,  $CDCl_3$ )  $\delta$  166.6, 148.2, 145.3, 142.4, 136.8, 135.7, 134.1, 133.0, 133.0, 132.8, 129.8, 129.5, 129.0, 128.9, 128.8, 128.6, 128.5, 128.0, 127.4, 125.1, 62.0, 14.5. HRMS (ESI) m/z:  $[M + H]^+$  Calcd for  $C_{24}H_{18}NO_2$  352.1332; Found 352.1330.

#### ethyl 10-(p-tolyl)acenaphtho[1,2-c]pyridine-7-carboxylate (**3ab**)

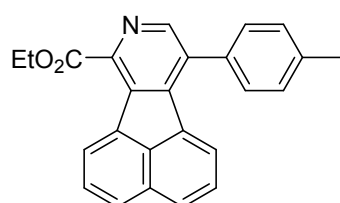

Purification by column chromatography on silica gel (PE/EA = 12/1, v/v) afforded **3ab** as a white solid (43.0 mg, 59% yield).

mp:119-120 °C. <sup>1</sup>H NMR (400 MHz, CDCl<sub>3</sub>) δ 8.90 (d, *J* = 7.2 Hz, 1H), 8.60 (s, 1H), 7.93 (t, *J* = 6.0 Hz, 2H), 7.73 (t, *J* = 7.6 Hz, 1H), 7.50 (s, 1H), 7.49 (d, *J* = 7.6 Hz, 3H), 7.44 (t, *J* = 7.6 Hz, 1H), 7.38 (d, *J* = 8.0 Hz, 2H), 4.67 (q, *J* = 7.2 Hz, 2H), 2.51 (s, 3H), 1.57 (t, *J* = 7.2 Hz, 3H). <sup>13</sup>C NMR (101 MHz, CDCl<sub>3</sub>) δ 166.6, 148.4, 145.3, 142.1, 138.7, 135.8, 134.2, 133.7, 133.2, 133.0, 132.8, 129.8, 129.6, 129.4, 128.9, 128.6, 128.5, 128.0, 127.4, 125.1, 62.1, 21.4, 14.5. HRMS (ESI) *m/z*: [M + H]<sup>+</sup> Calcd for C<sub>25</sub>H<sub>20</sub>NO<sub>2</sub> 366.1489; Found 366.1484.

**ethyl 10-(4-ethylphenyl)acenaphtho[1,2-*c*]pyridine-7-carboxylate (3ac)**

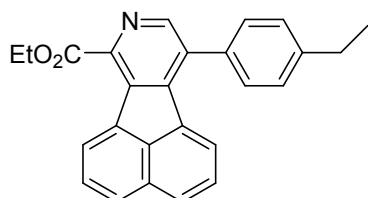

Purification by column chromatography on silica gel (PE/EA = 10/1, v/v) afforded **3ac** as a white solid (40.1 mg, 53% yield). mp:117-118 °C. <sup>1</sup>H NMR (400 MHz, CDCl<sub>3</sub>) δ 8.92 (d, *J* = 7.2 Hz, 1H), 8.61 (s, 1H), 7.97 (dd, *J* = 7.6, 5.2 Hz, 2H), 7.76 (t, *J* = 7.6 Hz, 1H), 7.53 (t, *J* = 7.2 Hz, 3H), 7.50-7.44 (m, 1H), 7.42 (d, *J* = 8.0 Hz, 2H), 4.67 (q, *J* = 7.2 Hz, 2H), 2.82 (q, *J* = 7.6 Hz, 2H), 1.57 (t, *J* = 7.2 Hz, 3H), 1.37 (t, *J* = 7.6 Hz, 3H). <sup>13</sup>C NMR (101 MHz, CDCl<sub>3</sub>) δ 166.7, 148.5, 145.3, 145.1, 142.1, 135.9, 134.2, 134.0, 133.2, 133.1, 132.9, 129.8, 129.5, 129.0, 128.6, 128.6, 128.4, 128.0, 127.4, 125.2, 62.1, 28.8, 15.5, 14.5. HRMS (ESI) *m/z*: [M + H]<sup>+</sup> Calcd for C<sub>25</sub>H<sub>20</sub>NO<sub>2</sub> 380.1645; Found 380.1641.

**ethyl 10-(4-methoxyphenyl)acenaphtho[1,2-*c*]pyridine-7-carboxylate (3ad)**

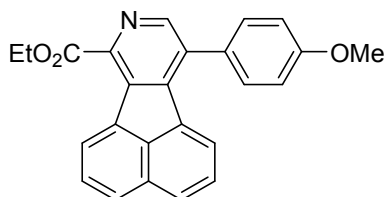

Purification by column chromatography on silica gel (PE/EA = 6/1, v/v) afforded **3ad** as a white solid (39.6 mg, 52% yield). mp:124-125 °C. <sup>1</sup>H NMR (400 MHz, CDCl<sub>3</sub>) δ 8.89 (d, *J* = 7.2 Hz, 1H), 8.58 (s, 1H), 7.94-7.90 (m, 2H), 7.72 (t, *J* = 7.6 Hz, 1H), 7.55-7.49 (m, 3H), 7.47-7.41 (m, 1H), 7.10 (d, *J* = 8.8 Hz, 2H), 4.66 (q, *J* = 7.1 Hz, 2H), 3.92 (s, 3H), 1.57 (t, *J* = 7.1 Hz, 3H). <sup>13</sup>C NMR (101 MHz, CDCl<sub>3</sub>) δ 166.6, 160.1, 148.5, 145.3, 142.0, 135.5, 134.2, 133.2, 133.0, 132.8, 130.3, 129.8, 129.4, 128.9, 128.6, 128.5, 128.0, 127.4, 125.0, 114.4, 62.0, 55.4, 14.5. HRMS (ESI) *m/z*: [M + H]<sup>+</sup> Calcd for C<sub>25</sub>H<sub>20</sub>NO<sub>3</sub> 382.1438; Found 382.1432.

**ethyl 10-(4-ethoxyphenyl)acenaphtho[1,2-*c*]pyridine-7-carboxylate (3ae)**

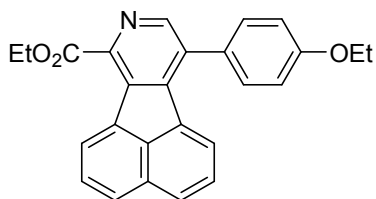

Purification by column chromatography on silica gel (PE/EA = 8/1, v/v) afforded **3ae** as a yellow solid (47.3 mg, 60% yield). mp:140-141 °C. <sup>1</sup>H NMR (400 MHz, CDCl<sub>3</sub>) δ 8.91 (d, *J* = 7.2 Hz, 1H), 8.60 (s, 1H), 7.98-7.93 (m, 2H), 7.75 (td, *J* = 7.6, 3.2 Hz, 1H), 7.58-7.50 (m, 3H), 7.47 (td, *J* = 7.6, 3.2 Hz, 1H), 7.10 (d, *J* = 8.8 Hz, 2H), 4.66 (q, *J* = 7.2 Hz, 2H), 4.16 (q, *J* = 6.8 Hz, 2H), 1.57 (t, *J* = 7.2 Hz, 3H), 1.51 (t, *J* = 7.2 Hz, 3H). <sup>13</sup>C NMR (101 MHz, CDCl<sub>3</sub>) δ 166.6, 159.5, 148.5, 145.3, 142.0, 135.6, 134.2, 133.2, 133.0, 132.8, 130.2, 129.8, 129.4, 128.7, 128.5, 128.5, 127.9, 127.4, 125.0, 114.9, 63.6, 62.0, 14.9, 14.5. HRMS (ESI) *m/z*: [M + H]<sup>+</sup> Calcd for C<sub>26</sub>H<sub>22</sub>NO<sub>3</sub> 396.1594; Found 396.1575.

**ethyl 10-((benzyloxy)methyl)acenaphtho[1,2-*c*]pyridine-7-carboxylate (3af)**

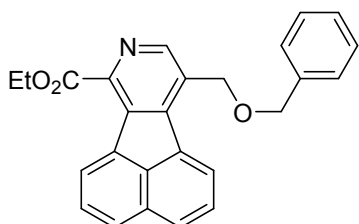

Purification by column chromatography on silica gel (PE/EA = 6/1, v/v) afforded **3af** as a yellow oil (37.9 mg, 48% yield). <sup>1</sup>H NMR (400 MHz, CDCl<sub>3</sub>) δ 8.82 (d, *J* = 7.2 Hz, 1H), 8.72 (s, 1H), 8.05 (d, *J* = 7.2 Hz, 1H), 7.97 (d, *J* = 8.0 Hz, 1H), 7.93 (d, *J* = 8.0

Hz, 1H), 7.70 (t,  $J = 8.0$  Hz, 1H), 7.63 (t,  $J = 8.0$  Hz, 1H), 7.39-7.29 (m, 5H), 5.03 (s, 2H), 4.65 (d,  $J = 6.8$  Hz, 4H), 1.57 (t,  $J = 7.2$  Hz, 3H).  $^{13}\text{C}$  NMR (101 MHz,  $\text{CDCl}_3$ )  $\delta$  166.5, 147.6, 146.4, 143.0, 137.4, 134.2, 132.8, 132.8, 132.7, 130.8, 129.7, 129.6, 128.6, 128.5, 128.5, 128.0, 127.9, 127.9, 127.8, 126.2, 72.4, 67.9, 62.1, 14.4. HRMS (ESI)  $m/z$ :  $[\text{M} + \text{H}]^+$  Calcd for  $\text{C}_{26}\text{H}_{22}\text{NO}_3$  396.1594; Found 396.1592.

**ethyl 10-(thiophen-3-yl)acenaphtho[1,2-c]pyridine-7-carboxylate (3ag)**

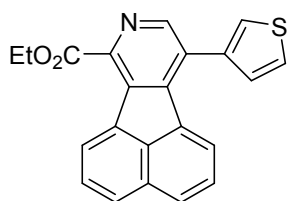

Purification by column chromatography on silica gel (PE/EA = 8/1, v/v) afforded **3ag** as a white solid (53.5 mg, 75% yield). mp:195-196 °C.  $^1\text{H}$  NMR (400 MHz,  $\text{CDCl}_3$ )  $\delta$  8.90 (d,  $J = 7.2$  Hz, 1H), 8.63 (s, 1H), 7.97 (d,  $J = 8.0$  Hz, 2H), 7.74 (t,  $J = 7.6$  Hz, 1H), 7.62 (d,  $J = 7.2$  Hz, 1H), 7.60-7.56 (m, 2H), 7.50 (t,  $J = 7.6$  Hz, 1H), 7.37 (dd,  $J = 4.8, 1.2$  Hz, 1H), 4.66 (q,  $J = 7.2$  Hz, 2H), 1.56 (t,  $J = 7.2$  Hz, 3H).  $^{13}\text{C}$  NMR (101 MHz,  $\text{CDCl}_3$ )  $\delta$  166.6, 148.3, 145.6, 142.4, 137.0, 134.2, 133.1, 133.0, 132.8, 130.8, 129.9, 129.6, 128.7, 128.6, 128.5, 128.1, 127.5, 126.7, 125.0, 124.5, 62.1, 14.5. HRMS (ESI)  $m/z$ :  $[\text{M} + \text{H}]^+$  Calcd for  $\text{C}_{22}\text{H}_{16}\text{NO}_2\text{S}$  358.0896; Found 358.0874.

**ethyl 10-(thiophen-3-yl)acenaphtho[1,2-c]pyridine-7-carboxylate (3ah)**

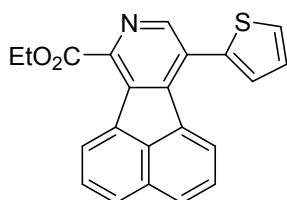

Purification by column chromatography on silica gel (PE/EA = 10/1, v/v) afforded **3ah** as a white solid (46.4 mg, 65% yield). mp:177-178 °C.  $^1\text{H}$  NMR (400 MHz,  $\text{CDCl}_3$ )  $\delta$  8.87 (d,  $J = 6.8$  Hz, 1H), 8.67 (s, 1H), 7.95 (d,  $J = 7.6$  Hz, 2H), 7.77-7.67 (m, 2H), 7.58 (d,  $J = 4.8$  Hz, 1H), 7.49 (t,  $J = 7.2$  Hz, 1H), 7.39 (d,  $J = 2.4$  Hz, 1H), 7.28 (d,  $J = 4.0$  Hz, 1H), 4.66 (q,  $J = 7.2$  Hz, 2H), 1.56 (t,  $J = 7.2$  Hz, 3H).  $^{13}\text{C}$  NMR (101 MHz,  $\text{CDCl}_3$ )  $\delta$  166.5, 148.9, 146.4, 142.8, 137.1, 134.1, 133.0, 132.8, 132.5, 129.8, 128.7, 128.7, 128.6, 128.1, 128.10, 127.8, 127.5, 127.2, 125.2, 62.1, 14.4. HRMS (ESI)  $m/z$ :  $[\text{M} + \text{H}]^+$  Calcd for  $\text{C}_{22}\text{H}_{16}\text{NO}_2\text{S}$  358.0896; Found 358.0883.

**ethyl 10-(pyridin-3-yl)acenaphtho[1,2-c]pyridine-7-carboxylate (3ai)**

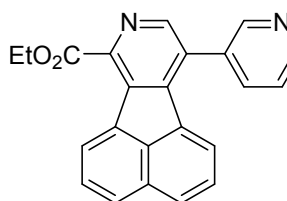

Purification by column chromatography on silica gel (PE/EA = 1/1, v/v) afforded **3ai** as a white solid (40.1 mg, 57% yield). mp:144-145 °C.  $^1\text{H}$  NMR (400 MHz,  $\text{CDCl}_3$ )  $\delta$  8.90 (d,  $J = 7.2$  Hz, 2H), 8.84 (d,  $J = 4.0$  Hz, 1H), 8.57 (s, 1H), 7.98 (d,  $J = 8.4$  Hz, 2H), 7.95 (dt,  $J = 7.6, 1.6$  Hz, 1H), 7.76 (t,  $J = 7.7$  Hz, 1H), 7.55 (dd,  $J = 7.6, 4.8$  Hz, 1H), 7.46 (t,  $J = 7.6$  Hz, 1H), 7.37 (d,  $J = 7.2$  Hz, 1H), 4.66 (q,  $J = 7.2$  Hz, 2H), 1.56 (t,  $J = 7.2$  Hz, 3H).  $^{13}\text{C}$  NMR (101 MHz,  $\text{CDCl}_3$ )  $\delta$  166.5, 150.1, 149.7, 148.1, 145.7, 143.2, 136.7, 134.2, 133.0, 132.8, 132.7, 132.5, 131.9, 130.0, 129.9, 128.9, 128.8, 128.3, 127.5, 124.9, 123.8, 62.2, 14.4. HRMS (ESI)  $m/z$ :  $[\text{M}]^+$  Calcd for  $\text{C}_{23}\text{H}_{16}\text{N}_2\text{O}_2$  353.1285; Found 353.1284.

**ethyl 10-butylacenaphtho[1,2-c]pyridine-7-carboxylate (3aj)**

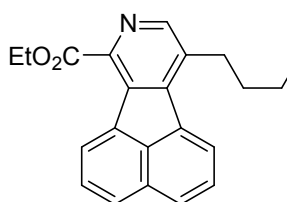

Purification by column chromatography on silica gel (PE/EA = 10/1, v/v) afforded **3aj** as a white solid (31.1 mg, 47% yield). mp:110-111 °C.  $^1\text{H}$  NMR (400 MHz,  $\text{CDCl}_3$ )  $\delta$  8.79 (d,  $J = 7.2$  Hz, 1H), 8.45 (s, 1H), 7.95 (d,  $J = 7.2$  Hz, 1H), 7.89 (d,  $J = 8.4$  Hz, 1H), 7.85 (d,  $J = 8.0$  Hz, 1H), 7.64 (t,  $J = 7.6$  Hz, 1H), 7.59 (t,  $J = 7.6$  Hz, 1H), 4.62 (q,  $J = 7.2$  Hz, 2H), 3.05 (t,  $J = 7.6$  Hz, 2H), 1.77-1.74 (m, 2H), 1.54 (t,  $J = 7.2$  Hz, 3H), 1.49-1.45 (m, 2H), 0.96 (t,  $J = 7.6$  Hz, 3H).  $^{13}\text{C}$  NMR (101 MHz,  $\text{CDCl}_3$ )  $\delta$  166.7,

148.7, 145.2, 141.4, 136.2, 134.2, 133.5, 133.2, 132.8, 129.7, 129.0, 128.5, 128.3, 127.8, 127.5, 124.9, 61.9, 31.1, 31.1, 22.8, 14.5, 13.9. HRMS (ESI)  $m/z$ :  $[M + H]^+$  Calcd for  $C_{22}H_{22}NO_2$  332.1645; Found 332.1648.

**ethyl 10-cyclopropylacenaphtho[1,2-*c*]pyridine-7-carboxylate (3ak)**

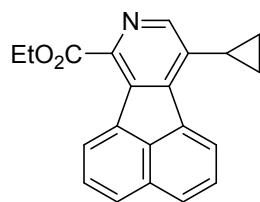

Purification by column chromatography on silica gel (PE/EA = 10/1, v/v) afforded **3ak** as a yellow solid (30.2 mg, 48% yield). mp: 103-104 °C.  $^1H$  NMR (400 MHz,  $CDCl_3$ )  $\delta$  8.85 (d,  $J = 7.2$  Hz, 1H), 8.50 (s, 1H), 8.36 (d,  $J = 7.2$  Hz, 1H), 7.99 (d,  $J = 8.4$  Hz, 1H), 7.94 (d,  $J = 8.0$  Hz, 1H), 7.72-7.66 (m, 2H), 4.62 (q,  $J = 7.2$  Hz, 2H), 2.42-2.35 (m, 1H), 1.54 (t,  $J = 7.2$  Hz, 3H), 1.26-1.19 (m, 2H), 0.95-0.91 (m, 2H).  $^{13}C$  NMR (101 MHz,  $CDCl_3$ )  $\delta$  166.6, 147.5, 146.9, 141.3, 135.9, 133.7, 133.7, 133.1, 132.9, 129.8, 129.3, 128.5, 128.5, 128.0, 127.6, 125.8, 62.0, 14.5, 12.3, 6.7. HRMS (ESI)  $m/z$ :  $[M + H]^+$  Calcd for  $C_{21}H_{18}NO_2$  316.1332; Found 336.1331.

**ethyl 10-(4-chlorophenyl)acenaphtho[1,2-*c*]pyridine-7-carboxylate (3al)**

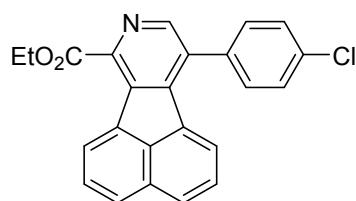

Purification by column chromatography on silica gel (PE/EA = 10/1, v/v) afforded **3al** as a white solid (43.8 mg, 57% yield). mp: 168-169 °C.  $^1H$  NMR (400 MHz,  $CDCl_3$ )  $\delta$  8.92 (d,  $J = 7.2$  Hz, 1H), 8.57 (s, 1H), 7.99 (d,  $J = 8.0$  Hz, 2H), 7.77 (t,  $J = 7.6$  Hz, 1H), 7.61-7.53 (m, 4H), 7.48 (q,  $J = 7.2$  Hz, 2H), 4.67 (q,  $J = 7.2$  Hz, 2H), 1.57 (t,  $J = 7.2$  Hz, 3H).  $^{13}C$  NMR (101 MHz,  $CDCl_3$ )  $\delta$  166.4, 147.9, 145.4, 142.5, 135.1, 135.1, 134.5, 134.2, 133.1, 132.8, 132.6, 130.4, 129.9, 129.8, 129.3, 128.8, 128.7, 128.2, 127.4, 125.1, 62.2, 14.4. HRMS (ESI)  $m/z$ :  $[M + H]^+$  Calcd for  $C_{24}H_{17}ClNO_2$  386.0942; Found 386.0934.

**ethyl 10-(3-chlorophenyl)acenaphtho[1,2-*c*]pyridine-7-carboxylate (3am)**

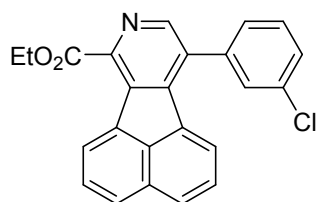

Purification by column chromatography on silica gel (PE/EA = 10/1, v/v) afforded **3am** as a white solid (40.1 mg, 52% yield). mp: 109-110 °C.  $^1H$  NMR (400 MHz,  $CDCl_3$ )  $\delta$  8.92 (d,  $J = 7.2$  Hz, 1H), 8.59 (s, 1H), 8.00 (d,  $J = 8.4$  Hz, 2H), 7.77 (t,  $J = 7.6$  Hz, 1H), 7.61 (s, 1H), 7.59-7.48 (m, 4H), 7.44 (d,  $J = 7.2$  Hz, 1H), 4.67 (q,  $J = 7.2$  Hz, 2H), 1.58 (t,  $J = 7.2$  Hz, 3H).  $^{13}C$  NMR (101 MHz,  $CDCl_3$ )  $\delta$  166.4, 147.7, 145.5, 142.6, 138.5, 135.0, 134.2, 133.1, 132.7, 132.5, 130.3, 129.9, 129.1, 129.1, 128.9, 128.7, 128.3, 127.5, 127.3, 125.2, 62.2, 14.4. HRMS (ESI)  $m/z$ :  $[M + H]^+$  Calcd for  $C_{24}H_{17}ClNO_2$  386.0942; Found 386.0924.

**ethyl 10-(2-chlorophenyl)acenaphtho[1,2-*c*]pyridine-7-carboxylate (3an)**

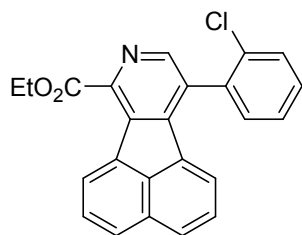

Purification by column chromatography on silica gel (PE/EA = 10/1, v/v) afforded **3an** as a white solid (41.5 mg, 54% yield). mp: 123-124 °C.  $^1H$  NMR (400 MHz,  $CDCl_3$ )  $\delta$  8.94 (d,  $J = 7.2$  Hz, 1H), 8.61 (s, 1H), 7.99-7.93 (m, 2H), 7.76 (t,  $J = 7.6$  Hz, 1H), 7.65 (d,  $J = 8.0$  Hz, 1H), 7.56-7.50 (m, 1H), 7.49-7.43 (m, 3H), 7.08 (d,  $J = 7.2$  Hz, 1H), 4.68 (q,  $J = 7.2$  Hz, 2H), 1.58 (t,  $J = 7.2$  Hz, 3H).  $^{13}C$  NMR (101 MHz,  $CDCl_3$ )  $\delta$  166.5, 148.1, 146.1, 142.7, 135.5, 134.1, 133.8, 133.1, 132.9, 132.8, 132.7, 131.0, 130.4, 130.1, 129.8, 129.7, 128.7, 128.6, 128.2, 127.6, 127.3, 124.6, 62.1, 14.5. HRMS (ESI)  $m/z$ :  $[M + H]^+$  Calcd for  $C_{24}H_{17}ClNO_2$  386.0942; Found 386.0942.

**ethyl 10-(4-bromophenyl)acenaphtho[1,2-c]pyridine-7-carboxylate (3ao)**

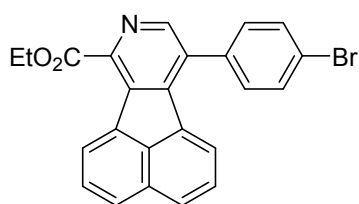

Purification by column chromatography on silica gel (PE/EA = 10/1, v/v) afforded **3ao** as a white solid (53.2 mg, 62% yield). mp:168-169 °C. <sup>1</sup>H NMR (400 MHz, CDCl<sub>3</sub>) δ 8.89 (d, *J* = 7.2 Hz, 1H), 8.56 (s, 1H), 7.96 (d, *J* = 8.0 Hz, 2H), 7.76-7.71 (m, 3H), 7.48-7.43 (m, 4H), 4.66 (q, *J* = 7.2 Hz, 2H), 1.57 (t, *J* = 7.2 Hz, 3H). <sup>13</sup>C NMR (101 MHz, CDCl<sub>3</sub>) δ 166.4, 147.8, 145.3, 142.5, 135.6, 134.4, 134.2, 133.0, 132.8, 132.6, 132.2, 130.7, 129.9, 129.8, 128.8, 128.7, 128.2, 127.4, 125.1, 123.2, 62.2, 14.4. HRMS (ESI) *m/z*: [M + H]<sup>+</sup> Calcd for C<sub>24</sub>H<sub>17</sub>BrNO<sub>2</sub> 430.0437; Found 430.0421.

**ethyl 10-(4-fluorophenyl)acenaphtho[1,2-c]pyridine-7-carboxylate (3ap)**

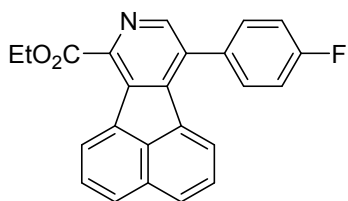

Purification by column chromatography on silica gel (PE/EA = 10/1, v/v) afforded **3ap** as a white solid (43.5 mg, 59% yield). mp:154-155 °C. <sup>1</sup>H NMR (400 MHz, CDCl<sub>3</sub>) δ 8.90 (d, *J* = 7.2 Hz, 1H), 8.57 (s, 1H), 7.96 (dd, *J* = 8.4, 2.8 Hz, 2H), 7.74 (t, *J* = 7.6 Hz, 1H), 7.58-7.55 (m, 2H), 7.46 (t, *J* = 7.6 Hz, 1H), 7.40 (d, *J* = 7.2 Hz, 1H), 7.29 (d, *J* = 8.4 Hz, 2H), 4.66 (q, *J* = 7.2 Hz, 2H), 1.57 (t, *J* = 7.2 Hz, 3H). <sup>13</sup>C NMR (101 MHz, CDCl<sub>3</sub>) δ 166.5, 163.2 (C-F, <sup>1</sup>*J*<sub>C-F</sub> = 249.5 Hz), 148.1, 145.5, 142.4, 134.7, 134.2, 133.1, 132.9, 132.7, 132.7, 130.9, 130.8, 129.9, 129.7, 128.7 (C-F, <sup>3</sup>*J*<sub>C-F</sub> = 10.1 Hz) 128.1, 127.4, 125.0, 116.1 (C-F, <sup>2</sup>*J*<sub>C-F</sub> = 21.2 Hz), 62.1, 14.5. HRMS (ESI) *m/z*: [M + H]<sup>+</sup> Calcd for C<sub>24</sub>H<sub>17</sub>FNO<sub>2</sub> 370.1238; Found 370.1236.

**ethyl 10-(2-fluorophenyl)acenaphtho[1,2-c]pyridine-7-carboxylate (3aq)**

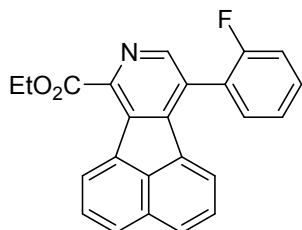

Purification by column chromatography on silica gel (PE/EA = 10/1, v/v) afforded **3aq** as a yellow solid (48.7 mg, 66% yield). mp:171-172 °C. <sup>1</sup>H NMR (400 MHz, CDCl<sub>3</sub>) δ 8.92 (d, *J* = 7.2 Hz, 1H), 8.65 (s, 1H), 7.98 (d, *J* = 8.0 Hz, 2H), 7.76 (t, *J* = 7.2 Hz, 1H), 7.62-7.52 (m, 2H), 7.49 (t, *J* = 8.0 Hz 1H), 7.38 (td, *J* = 7.6, 1.2 Hz 1H), 7.33 (t, *J* = 8.4 Hz 2H), 4.68 (q, *J* = 7.1 Hz, 2H), 1.58 (t, *J* = 7.2 Hz, 3H). <sup>13</sup>C NMR (101 MHz, CDCl<sub>3</sub>) δ 166.4, 160.0 (C-F, <sup>1</sup>*J*<sub>C-F</sub> = 250.5 Hz), 158.8, 148.4, 146.4, 142.6, 134.2, 133.1, 133.0, 132.7, 131.3 (C-F, <sup>4</sup>*J*<sub>C-F</sub> = 3.0 Hz), 131.1 (C-F, <sup>3</sup>*J*<sub>C-F</sub> = 8.1 Hz), 129.8, 129.2, 128.8, 128.6, 128.2, 127.6, 124.8 (C-F, <sup>4</sup>*J*<sub>C-F</sub> = 4.0 Hz), 124.6, 124.3 (C-F, <sup>2</sup>*J*<sub>C-F</sub> = 16.2 Hz), 116.3 (C-F, <sup>2</sup>*J*<sub>C-F</sub> = 21.2 Hz), 62.2, 14.4. HRMS (ESI) *m/z*: [M + H]<sup>+</sup> Calcd for C<sub>24</sub>H<sub>17</sub>FNO<sub>2</sub> 370.1238; Found 370.1226.

**ethyl 10-(3-fluorophenyl)acenaphtho[1,2-c]pyridine-7-carboxylate (3ar)**

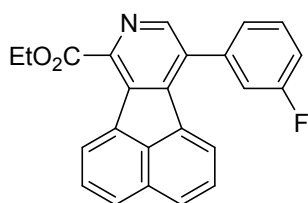

Purification by column chromatography on silica gel (PE/EA = 10/1, v/v) afforded **3ar** as a yellow solid (40.6 mg, 55% yield). mp:146-147 °C. <sup>1</sup>H NMR (400 MHz, CDCl<sub>3</sub>) δ 8.91 (d, *J* = 7.2 Hz, 1H), 8.59 (s, 1H), 7.99 (d, *J* = 8.0 Hz, 2H), 7.80-7.74 (m, 1H), 7.57 (td, *J* = 8.0, 6.0 Hz, 1H), 7.51-7.44 (m, 2H), 7.40 (d, *J* = 7.6 Hz, 1H), 7.35-7.27 (m, 2H), 4.67 (q, *J* = 7.2 Hz, 2H), 1.57 (t, *J* = 7.2 Hz, 3H). <sup>13</sup>C NMR (101 MHz, CDCl<sub>3</sub>) δ 166.5, 163.0 (C-F, <sup>1</sup>*J*<sub>C-F</sub> = 248.5 Hz), 147.8, 145.4, 142.6, 138.9 (C-F, <sup>3</sup>*J*<sub>C-F</sub> = 7.1 Hz), 134.4, 134.2, 133.1, 132.7, 132.6, 130.7 (C-F, <sup>3</sup>*J*<sub>C-F</sub> = 9.1 Hz), 129.9, 129.9, 128.8, 128.7, 128.2,



127.5, 125.2, 124.9 (C-F,  $^4J_{C-F}$  = 3.0 Hz), 116.2 (C-F,  $^2J_{C-F}$  = 22.2 Hz), 115.9 (C-F,  $^2J_{C-F}$  = 20.0 Hz), 62.2, 14.4. HRMS (ESI) m/z: [M + H]<sup>+</sup> Calcd for C<sub>24</sub>H<sub>17</sub>FNO<sub>2</sub> 370.1238; Found 370.1223.

**ethyl 10-(4-cyanophenyl)acenaphtho[1,2-c]pyridine-7-carboxylate (3as)**

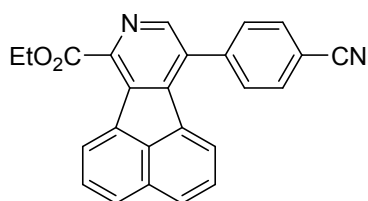

Purification by column chromatography on silica gel (PE/EA = 80/1, v/v) afforded **3as** as a white solid (48.8 mg, 65% yield). mp: 185-186 °C. <sup>1</sup>H NMR (400 MHz, CDCl<sub>3</sub>) δ 8.92 (d, *J* = 7.2 Hz, 1H), 8.56 (s, 1H), 8.01 (d, *J* = 8.0 Hz, 2H), 7.91 (d, *J* = 8.0 Hz, 2H), 7.80-7.75 (m, 3H), 7.50 (t, *J* = 7.6 Hz, 1H), 7.36 (d, *J* = 7.2 Hz, 1H), 4.67 (q, *J* = 7.2 Hz, 2H), 1.57 (t, *J* = 7.2 Hz, 3H).

<sup>13</sup>C NMR (101 MHz, CDCl<sub>3</sub>) δ 166.4, 147.5, 145.2, 143.3, 141.7, 134.2, 133.6, 133.1, 132.8, 132.4, 132.4, 130.2, 130.0, 130.0, 129.0, 128.8, 128.4, 127.5, 124.9, 118.4, 112.9, 62.3, 14.4. HRMS (ESI) m/z: [M]<sup>+</sup> Calcd for C<sub>25</sub>H<sub>16</sub>N<sub>2</sub>O<sub>2</sub> 377.1285; Found 377.1275

**ethyl 10-(4-(methoxycarbonyl)phenyl)acenaphtho[1,2-c]pyridine-7-carboxylate (3at)**

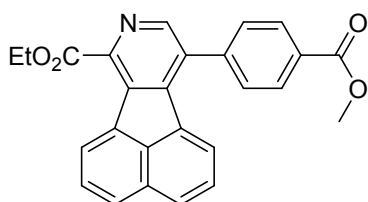

Purification by column chromatography on silica gel (PE/EA = 5/1, v/v) afforded **3at** as a white solid (53.2 mg, 65% yield). mp: 160-161 °C. <sup>1</sup>H NMR (400 MHz, CDCl<sub>3</sub>) δ 8.92 (d, *J* = 7.2 Hz, 1H), 8.60 (s, 1H), 8.27 (d, *J* = 8.0 Hz, 2H), 7.99 (dd, *J* = 8.4, 3.6 Hz, 2H), 7.78 (d, *J* = 7.6 Hz, 1H), 7.70 (d, *J* = 8.4 Hz, 2H), 7.46 (t, *J* = 7.6 Hz, 1H), 7.40 (d, *J* = 6.8 Hz, 1H), 4.67 (q, *J* =

7.2 Hz, 2H), 4.01 (s, 3H), 1.57 (t, *J* = 7.2 Hz, 3H). <sup>13</sup>C NMR (101 MHz, CDCl<sub>3</sub>) δ 166.7, 166.3, 147.5, 145.5, 142.6, 141.4, 134.7, 134.3, 133.1, 132.7, 132.5, 130.7, 130.3, 130.0, 129.9, 129.2, 128.9, 128.7, 128.3, 127.5, 125.2, 62.3, 52.4, 14.4. HRMS (ESI) m/z: [M + H]<sup>+</sup> Calcd for C<sub>26</sub>H<sub>20</sub>NO<sub>4</sub> 410.1387; Found 410.1373.

**ethyl 10-(4-(trifluoromethyl)phenyl)acenaphtho[1,2-c]pyridine-7-carboxylate (3au)**

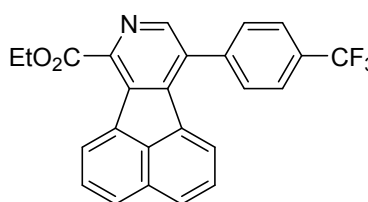

Purification by column chromatography on silica gel (PE/EA = 8/1, v/v) afforded **3au** as a white solid (58.6 mg, 70% yield). mp: 150-151 °C. <sup>1</sup>H NMR (400 MHz, CDCl<sub>3</sub>) δ 8.90 (d, *J* = 7.2 Hz, 1H), 8.57 (s, 1H), 7.96 (d, *J* = 8.0 Hz, 2H), 7.86 (d, *J* = 8.0 Hz, 2H), 7.74 (t, *J* = 8.0 Hz, 3H), 7.46 (t, *J* = 7.6 Hz, 1H), 7.36 (d, *J* = 7.2 Hz, 1H), 4.67 (q, *J* = 7.2 Hz, 2H), 1.57 (t, *J* = 7.2 Hz,

3H). <sup>13</sup>C NMR (101 MHz, CDCl<sub>3</sub>) δ 166.4, 147.8, 145.3, 142.9, 140.6, 134.2, 134.1, 133.0, 132.6, 132.5, 131.1 (C-F,  $^2J_{C-F}$  = 30.3 Hz), 130.0, 129.9, 129.6, 128.8 (C-F,  $^3J_{C-F}$  = 14.1 Hz), 128.3, 127.5, 126.0 (C-F,  $^4J_{C-F}$  = 3.0 Hz), 125.4, 125.0, 122.7, 62.2, 14.4. HRMS (ESI) m/z: [M + H]<sup>+</sup> Calcd for C<sub>25</sub>H<sub>17</sub>F<sub>3</sub>NO<sub>2</sub> 420.1206; Found 420.1202.

**ethyl 10-(naphthalen-2-yl)acenaphtho[1,2-c]pyridine-7-carboxylate (3av)**

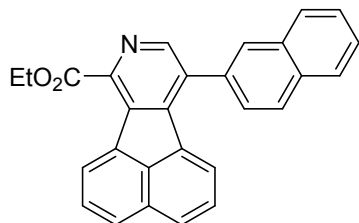

Purification by column chromatography on silica gel (PE/EA = 10/1, v/v) afforded **3av** as a white solid (35.3 mg, 44% yield). mp: 118-119 °C. <sup>1</sup>H NMR (400 MHz, CDCl<sub>3</sub>) δ 8.95 (d, *J* = 7.2 Hz, 1H), 8.71 (s, 1H), 8.09 (s, 1H), 8.05 (d, *J* = 8.4 Hz, 1H), 8.02-7.92 (m, 4H), 7.77 (t, *J* = 7.6 Hz, 1H), 7.72 (d, *J* = 9.6 Hz, 1H), 7.61 (td, *J* = 6.8, 6.1, 3.6 Hz, 2H), 7.43 (d, *J* = 7.2 Hz, 1H), 7.38

(t, *J* = 7.6 Hz, 1H), 4.69 (q, *J* = 7.2 Hz, 2H), 1.59 (t, *J* = 7.2 Hz, 3H). <sup>13</sup>C NMR (101 MHz, CDCl<sub>3</sub>) δ 166.6, 148.4, 145.5, 142.3, 135.7, 134.2, 134.2, 133.4, 133.2, 133.1, 133.0, 132.8, 129.8, 129.6,

128.7, 128.6, 128.6, 128.3, 128.1, 128.1, 127.9, 127.4, 126.9, 126.8, 126.8, 125.2, 62.1, 14.5. HRMS (ESI) m/z: [M + H]<sup>+</sup> Calcd for C<sub>28</sub>H<sub>20</sub>NO<sub>2</sub> 402.1489; Found 402.1434.

**ethyl 10-(phenanthren-9-yl)acenaphtho[1,2-c]pyridine-7-carboxylate (3aw)**

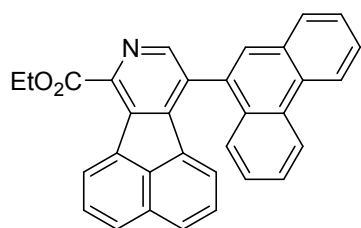

Purification by column chromatography on silica gel (PE/EA = 10/1, v/v) afforded **3aw** as a white solid (35.2 mg, 39% yield). mp:209-210 °C. <sup>1</sup>H NMR (400 MHz, CDCl<sub>3</sub>) δ 9.01 (d, *J* = 7.2 Hz, 1H), 8.86 (t, *J* = 8.4 Hz, 2H), 8.79 (s, 1H), 7.96 (dd, *J* = 8.0, 3.2 Hz, 2H), 7.93 (s, 1H), 7.86 (d, *J* = 8.0 Hz, 1H), 7.79 (t, *J* = 7.6 Hz, 2H), 7.69 (t, *J* = 7.6 Hz, 2H), 7.61 (d, *J* = 8.0 Hz, 1H), 7.40 (t, *J* = 7.6 Hz, 1H), 7.17 (t, *J* = 7.6 Hz, 1H), 6.82 (d, *J* = 7.2 Hz, 1H), 4.73 (q, *J* = 7.2 Hz, 2H), 1.63 (t, *J* = 7.2 Hz, 3H). <sup>13</sup>C NMR (101 MHz, CDCl<sub>3</sub>) δ 166.8, 149.1, 147.0, 142.8, 142.8, 134.2, 133.9, 133.2, 133.1, 132.9, 132.9, 131.3, 130.7, 130.5, 130.5, 129.8, 129.5, 129.1, 128.8, 128.7, 128.3, 128.0, 127.6, 127.5, 127.2, 127.1, 126.5, 125.6, 123.2, 122.8, 62.2, 14.6. HRMS (ESI) m/z: [M + H]<sup>+</sup> Calcd for C<sub>32</sub>H<sub>22</sub>NO<sub>2</sub> 452.1645; Found 452.1642.

**ethyl 4-phenyl-5H-chromeno[4,3-c]pyridine-1-carboxylate (5aa)**

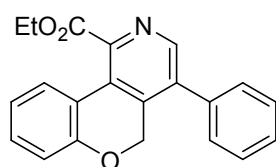

Purification by column chromatography on silica gel (PE/EA = 10/1, v/v) afforded **5aa** as a white solid (31.2 mg, 47% yield). mp:91-92 °C. <sup>1</sup>H NMR (400 MHz, CDCl<sub>3</sub>) δ 8.54 (s, 1H), 7.55-7.45 (m, 4H), 7.36-7.28 (m, 3H), 7.07 (t, *J* = 8.4 Hz, 2H), 5.02 (s, 2H), 4.46 (q, *J* = 7.2 Hz, 2H), 1.35 (t, *J* = 7.2 Hz, 3H). <sup>13</sup>C NMR (101 MHz, CDCl<sub>3</sub>) δ 168.1, 155.8, 148.0, 145.8, 141.0, 135.2, 135.2, 130.4, 129.1, 128.9, 128.8, 126.4, 124.4, 122.4, 120.2, 117.7, 65.6, 62.3, 14.0. HRMS (ESI) m/z: [M + H]<sup>+</sup> Calcd for C<sub>21</sub>H<sub>18</sub>NO<sub>3</sub> 332.1281 ; Found 332.1279.

**ethyl 4-(p-tolyl)-5H-chromeno[4,3-c]pyridine-1-carboxylate(5ab)**

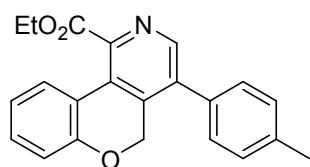

Purification by column chromatography on silica gel (PE/EA = 10/1, v/v) afforded **5ab** as a white solid (29.6 mg, 43% yield). mp:106-107 °C. <sup>1</sup>H NMR (400 MHz, CDCl<sub>3</sub>) δ 8.53 (s, 1H), 7.54 (d, *J* = 7.6 Hz, 1H), 7.31 (d, *J* = 7.6 Hz, 3H), 7.19 (d, *J* = 8.0 Hz, 2H), 7.06 (t, *J* = 7.6 Hz, 2H), 5.03 (s, 2H), 4.46 (q, *J* = 7.2 Hz, 2H), 2.44 (s, 3H), 1.35 (t, *J* = 7.2 Hz, 3H). <sup>13</sup>C NMR (101 MHz, CDCl<sub>3</sub>) δ 168.1, 155.9, 148.0, 145.5, 141.0, 138.8, 135.2, 132.2, 130.8, 129.6, 129.0, 126.4, 124.4, 122.4, 120.22, 117.7, 65.7, 62.2, 21.3, 14.0. HRMS (ESI) m/z: [M + H]<sup>+</sup> Calcd for C<sub>22</sub>H<sub>20</sub>NO<sub>3</sub> 346.1438 ; Found 346.1441.

**ethyl 4-(3-methoxyphenyl)-5H-chromeno[4,3-c]pyridine-1-carboxylate(5ac)**

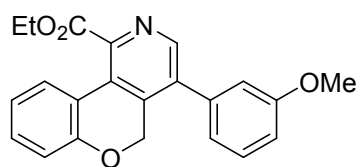

Purification by column chromatography on silica gel (PE/EA = 10/1, v/v) afforded **5ac** as a white solid (29.6 mg, 40% yield). mp:124-125 °C. <sup>1</sup>H NMR (400 MHz, CDCl<sub>3</sub>) δ 8.53 (s, 1H), 7.54 (d, *J* = 6.8 Hz, 1H), 7.41 (t, *J* = 8.0 Hz, 1H), 7.32 (t, *J* = 8.4 Hz, 1H), 7.06 (t, *J* = 8.0 Hz, 2H), 7.00 (d, *J* = 8.4 Hz, 1H), 6.89-6.80 (m, 2H), 5.02 (s, 2H), 4.45 (q, *J* = 7.2 Hz, 2H), 3.85 (s, 3H), 1.35 (t, *J* = 7.2 Hz, 3H). <sup>13</sup>C NMR (101 MHz, CDCl<sub>3</sub>) δ 168.1, 159.8, 155.8, 147.8, 145.8, 141.0, 136.5, 135.1, 130.9, 130.0, 126.4, 124.4, 122.4, 121.4, 120.1, 117.7, 114.9, 114.0, 65.6, 62.2, 55.4, 14.0. HRMS (ESI) m/z: [M + H]<sup>+</sup> Calcd for C<sub>22</sub>H<sub>20</sub>NO<sub>4</sub> 362.1387 ; Found 362.1389.

**ethyl 4-(3-nitrophenyl)-5H-chromeno[4,3-c]pyridine-1-carboxylate(5ad)**

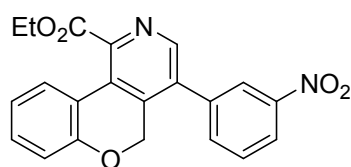

Purification by column chromatography on silica gel (PE/EA = 10/1, v/v) afforded **5ad** as a white solid (34.6 mg, 46% yield).

mp:134-135 °C. <sup>1</sup>H NMR (400 MHz, CDCl<sub>3</sub>) δ 8.52 (s, 1H), 8.33 (d, *J* = 9.2 Hz, 1H), 8.18 (s, 1H), 7.72 (t, *J* = 8.0 Hz, 1H), 7.66 (d, *J* = 7.6 Hz, 1H), 7.53 (d, *J* = 8.0 Hz, 1H), 7.32 (t, *J* = 8.0 Hz, 1H), 7.11-7.00 (m, 2H), 4.99 (s, 2H), 4.45 (q, *J* = 7.2 Hz, 2H), 1.34 (t, *J* = 7.2 Hz, 3H). <sup>13</sup>C NMR (101 MHz, CDCl<sub>3</sub>) δ 167.7, 155.7, 148.4, 147.5, 146.8, 141.1, 136.8, 135.0, 132.8, 131.2, 130.2, 126.4, 124.6, 123.9, 123.7, 122.64, 119.7, 117.8, 65.3, 62.4, 14.0. HRMS (ESI) *m/z*: [M + H]<sup>+</sup> Calcd for C<sub>21</sub>H<sub>17</sub>N<sub>2</sub>O<sub>5</sub> 377.1132 ; Found 377.1135.

#### ethyl 4-phenylbenzo[*c*][2,6]naphthyridine-1-carboxylate (**5ba**)

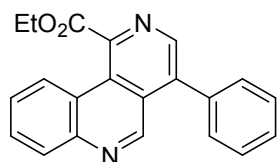

Purification by column chromatography on silica gel (PE/EA = 5/1, v/v) afforded **5ba** as a white solid (26.5 mg, 52% yield). mp:131-132 °C. <sup>1</sup>H NMR (400 MHz, CDCl<sub>3</sub>) δ 9.41 (s, 1H), 8.82 (s, 1H), 8.37 (d, *J* = 8.4 Hz, 1H), 8.24 (d, *J* = 8.0 Hz, 1H), 7.84 (t, *J* = 7.6 Hz, 1H), 7.72 (t, *J* = 7.6 Hz, 1H), 7.61-7.54 (m, 5H), 4.68 (q, *J* = 7.2 Hz, 2H), 1.50 (t, *J* = 7.2 Hz, 3H). <sup>13</sup>C NMR (101 MHz, CDCl<sub>3</sub>) δ 168.7, 150.5, 148.9, 145.3, 145.1, 135.8, 134.5, 130.7, 130.4, 130.0, 129.0, 129.0, 128.1, 128.1, 124.6, 123.6, 120.5, 62.9, 14.0. HRMS (ESI) *m/z*: [M + H]<sup>+</sup> Calcd for C<sub>21</sub>H<sub>17</sub>N<sub>2</sub>O<sub>2</sub> 329.1285 ; Found 329.1281

#### ethyl 4-(*p*-tolyl)benzo[*c*][2,6]naphthyridine-1-carboxylate(**5bb**)

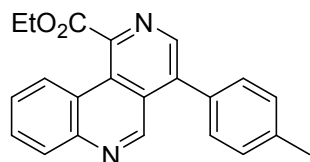

Purification by column chromatography on silica gel (PE/EA = 5/1, v/v) afforded **5bb** as a white solid (26.5 mg, 47% yield). mp:139-140 °C. <sup>1</sup>H NMR (400 MHz, CDCl<sub>3</sub>) δ 9.43 (s, 1H), 8.80 (s, 1H), 8.37 (d, *J* = 8.4 Hz, 1H), 8.24 (d, *J* = 9.2 Hz, 1H), 7.83 (t, *J* = 7.2 Hz, 1H), 7.71 (t, *J* = 8.4 Hz, 1H), 7.46-7.36 (m, 4H), 4.67 (q, *J* = 7.2 Hz, 2H), 2.49 (s, 3H), 1.49 (t, *J* = 7.2 Hz, 3H). <sup>13</sup>C NMR (101 MHz, CDCl<sub>3</sub>) δ 168.8, 150.6, 148.7, 145.3, 145.2, 139.1, 135.9, 131.6, 130.7, 130.3, 130.0, 129.7, 128.1, 128.1, 124.6, 123.6, 120.6, 62.9, 21.34, 14.0. HRMS (ESI) *m/z*: [M + H]<sup>+</sup> Calcd for C<sub>22</sub>H<sub>19</sub>N<sub>2</sub>O<sub>2</sub> 343.1441 ; Found 343.1441.

#### ethyl 4-(3-methoxyphenyl)benzo[*c*][2,6]naphthyridine-1-carboxylate(**5bc**)

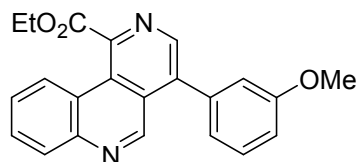

Purification by column chromatography on silica gel (PE/EA = 5/1, v/v) afforded **5bc** as a white solid (27.2 mg, 38% yield). mp:147-148 °C. <sup>1</sup>H NMR (400 MHz, CDCl<sub>3</sub>) δ 9.42 (s, 1H), 8.81 (s, 1H), 8.36 (d, *J* = 8.4 Hz, 1H), 8.23 (d, *J* = 8.0 Hz, 1H), 7.82 (t, *J* = 8.0 Hz, 1H), 7.70 (t, *J* = 8.4 Hz, 1H), 7.48 (t, *J* = 8.0 Hz, 1H), 7.15-7.04 (m, 3H), 4.66 (q, *J* = 7.2 Hz, 2H), 3.86 (s, 3H), 1.48 (t, *J* = 7.2 Hz, 3H). <sup>13</sup>C NMR (101 MHz, CDCl<sub>3</sub>) δ 168.7, 159.9, 150.5, 149.0, 145.3, 145.0, 135.9, 135.7, 130.7, 130.0, 128.1, 128.1, 124.6, 123.5, 122.9, 120.5, 116.1, 114.4, 62.9, 55.4, 14.0. HRMS (ESI) *m/z*: [M + H]<sup>+</sup> Calcd for C<sub>22</sub>H<sub>19</sub>N<sub>2</sub>O<sub>3</sub> 359.1390 ; Found 359.1392.

#### ethyl 4-(3-nitrophenyl)benzo[*c*][2,6]naphthyridine-1-carboxylate(**5bd**)

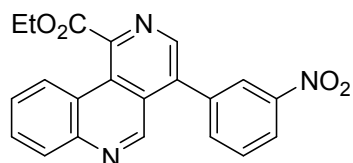

Purification by column chromatography on silica gel (PE/EA = 5/1, v/v) afforded **5bd** as a yellow solid (29.8 mg, 40% yield). mp:161-162 °C. <sup>1</sup>H NMR (400 MHz, CDCl<sub>3</sub>) δ 9.27 (s, 1H), 8.80 (s, 1H), 8.45-8.39 (m, 2H), 8.36 (d, *J* = 9.2 Hz, 1H), 8.23 (d, *J* = 8.0 Hz, 1H), 7.89 (d, *J* = 7.6 Hz, 1H), 7.85 (t, *J* = 7.6 Hz, 1H), 7.79 (t, *J* = 8.0 Hz, 1H), 7.76-7.71 (m, 1H), 4.67 (q, *J* = 7.2 Hz, 2H), 1.48 (t, *J* = 7.2 Hz, 3H). <sup>13</sup>C NMR (101 MHz, CDCl<sub>3</sub>) δ 168.3, 150.2, 149.2, 148.6, 145.4, 144.9, 136.3, 136.3, 133.1, 130.9, 130.4, 130.2, 128.6, 127.8, 125.1, 124.5, 124.0, 123.7, 120.3, 63.1, 14.0. HRMS (ESI) *m/z*: [M + H]<sup>+</sup> Calcd for C<sub>21</sub>H<sub>16</sub>N<sub>3</sub>O<sub>4</sub> 374.1135 ; Found 374.1137.

### methyl 10-phenylacenaphtho[1,2-c]pyridine-7-carboxylate (**3ba**)

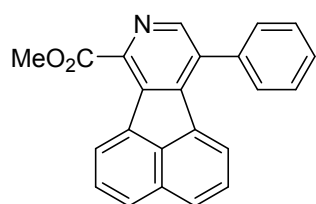

Purification by column chromatography on silica gel (PE/EA = 20/1, v/v) afforded **3ba** as a white solid (38.4 mg, 57% yield). mp:132-133 °C. <sup>1</sup>H NMR (400 MHz, CDCl<sub>3</sub>) δ 8.95 (d, *J* = 7.2 Hz, 1H), 8.59 (d, *J* = 2.8 Hz, 1H), 7.98-7.90 (m, 2H), 7.73 (t, *J* = 7.6 Hz, 1H), 7.60-7.57 (m, 5H), 7.45-7.39 (m, 2H), 4.17 (s, 3H). <sup>13</sup>C NMR (101 MHz, CDCl<sub>3</sub>) δ 166.9, 148.2, 145.4, 141.7, 136.7, 136.0, 134.5, 133.1, 133.0, 132.7, 129.83, 129.6, 129.1, 129.0, 128.9, 128.7, 128.6, 128.3, 127.4, 125.1, 53.0. HRMS (ESI) *m/z*: [M + H]<sup>+</sup> Calcd for C<sub>23</sub>H<sub>16</sub>NO<sub>2</sub> 338.1176; Found 338.1172.

### benzyl 10-phenylacenaphtho[1,2-c]pyridine-7-carboxylate (**3ca**)

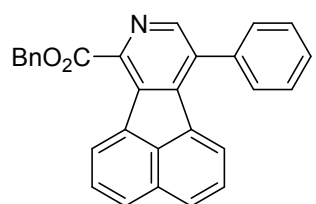

Purification by column chromatography on silica gel (PE/EA = 10/1, v/v) afforded **3ca** as a white solid (43.7 mg, 53% yield). mp:136-137 °C. <sup>1</sup>H NMR (400 MHz, CDCl<sub>3</sub>) δ 8.79 (d, *J* = 7.2 Hz, 1H), 8.61 (s, 1H), 7.95 (d, *J* = 7.6 Hz, 2H), 7.69 (t, *J* = 7.6 Hz, 1H), 7.62-7.58 (m, 7H), 7.46-7.39 (m, 4H), 7.36 (t, *J* = 7.2 Hz, 1H), 5.66 (s, 2H). <sup>13</sup>C NMR (101 MHz, CDCl<sub>3</sub>) δ 166.5, 148.3, 145.3, 142.2, 136.8, 135.8, 134.2, 133.1, 133.1, 132.7, 129.9, 129.6, 129.1, 129.0, 128.9, 128.7, 128.6, 128.4, 128.0, 127.4, 125.2, 67.6. HRMS (ESI) *m/z*: [M + H]<sup>+</sup> Calcd for C<sub>29</sub>H<sub>20</sub>NO<sub>2</sub> 414.1489; Found 414.1486.

### tert-butyl 10-phenylacenaphtho[1,2-c]pyridine-7-carboxylate (**3da**)

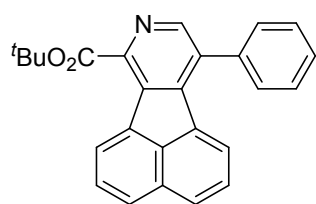

Purification by column chromatography on silica gel (PE/EA = 10/1, v/v) afforded **3da** as a white solid (38.6 mg, 51% yield). mp:124-125 °C. <sup>1</sup>H NMR (400 MHz, CDCl<sub>3</sub>) δ 8.71 (d, *J* = 7.2 Hz, 1H), 8.59 (s, 1H), 7.96-7.93 (m, 2H), 7.74 (t, *J* = 7.6 Hz, 1H), 7.61-7.56 (m, 5H), 7.48-7.42 (m, 2H), 1.81 (s, 9H). <sup>13</sup>C NMR (101 MHz, CDCl<sub>3</sub>) δ 166.5, 148.4, 145.0, 144.4, 136.9, 135.1, 133.3, 133.0, 132.9, 132.8, 129.9, 129.4, 129.1, 129.0, 128.8, 128.5, 128.4, 127.5, 126.9, 125.1, 82.8, 28.4. HRMS (ESI) *m/z*: [M + H]<sup>+</sup> Calcd for C<sub>26</sub>H<sub>22</sub>NO<sub>2</sub> 380.1645; Found 380.1648.

### 1,4-phenylenebis(methylene) bis(10-phenylacenaphtho[1,2-c]pyridine-7-carboxylate) (**3ea**)

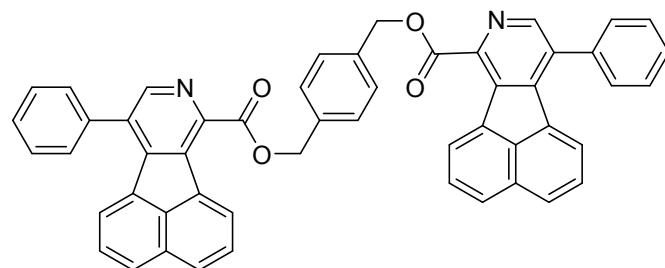

Purification by column chromatography on silica gel (PE/EA = 5/1, v/v) afforded **3ea** as a white solid (69.6 mg, 47% yield). mp:141-142 °C. <sup>1</sup>H NMR (400 MHz, CDCl<sub>3</sub>) δ 8.77 (d, *J* = 7.2 Hz, 2H), 8.61 (s, 2H), 7.92 (dd, *J* = 6.4, 2.4 Hz, 2H), 7.89 (s, 1H), 7.87 (s, 1H), 7.67 (t, *J* = 7.2 Hz, 6H), 7.59 (s, 10H), 7.45-7.40 (m, 4H), 5.67 (s, 4H). <sup>13</sup>C NMR (101 MHz, CDCl<sub>3</sub>) δ 166.4, 148.3, 145.3, 142.0, 136.7, 136.1, 135.8, 134.3, 133.0, 133.0, 132.6, 129.8, 129.5, 129.0, 129.0, 128.9, 128.9, 128.6, 128.6, 128.0, 127.4, 125.1, 67.2. HRMS (ESI) *m/z*: [M + H]<sup>+</sup> Calcd for C<sub>52</sub>H<sub>33</sub>N<sub>2</sub>O<sub>4</sub> 749.2435; Found 749.2446.

### ethyl 5-(8-(phenylethynyl)naphthalen-1-yl)-4,5-dihydrooxazole-4-carboxylate (**intermediate B1**)

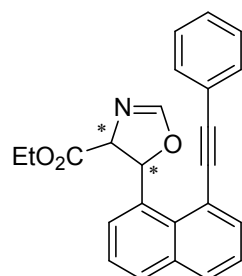

Purification by column chromatography on silica gel (PE/EA = 5/1, v/v) afforded **B1** as a white solid (78.2 mg, 53% yield). <sup>1</sup>H NMR (400 MHz,

CDCl<sub>3</sub>)  $\delta$  8.09 (d,  $J$  = 6.0 Hz, 1H), 7.93-7.84 (m, 3H), 7.63-7.57 (m, 3H), 7.53-7.45 (m, 2H), 7.43-7.33 (m, 3H), 7.26 (s, 1H), 4.67 (dd,  $J$  = 6.0, 2.0 Hz, 1H), 3.98-3.84 (m, 2H), 1.09 (t,  $J$  = 7.2 Hz, 3H). <sup>13</sup>C NMR (101 MHz, CDCl<sub>3</sub>)  $\delta$  170.5, 157.0, 135.9, 135.9, 134.7, 131.5, 130.6, 130.5, 129.1, 128.7, 128.4, 125.9, 125.3, 123.0, 118.3, 95.9, 90.6, 78.6, 76.0, 61.6, 13.9. HRMS (ESI)  $m/z$ : [M + H]<sup>+</sup> Calcd for C<sub>24</sub>H<sub>20</sub>NO<sub>3</sub> 370.1438; Found 370.1435.

**ethyl 5-(8-(phenylethynyl)naphthalen-1-yl)-4,5-dihydrooxazole-4-carboxylate (intermediate B2)**

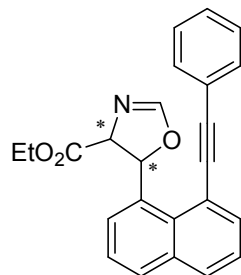

Purification by column chromatography on silica gel (PE/EA = 5/1, v/v) afforded **B2** as a white solid (53.1 mg, 36% yield). <sup>1</sup>H NMR (400 MHz, CDCl<sub>3</sub>)  $\delta$  7.90-7.83 (m, 2H), 7.83-7.79 (m, 2H), 7.66 (d,  $J$  = 7.2 Hz, 1H), 7.58-7.53 (m, 2H), 7.50-7.45 (m, 2H), 7.43-7.39 (m, 3H), 7.47 (d,  $J$  = 1.6 Hz, 1H), 5.50 (dd,  $J$  = 10.8, 1.6 Hz, 1H), 3.47 (dq,  $J$  = 14.0, 6.8 Hz, 1H), 3.22 (dq,  $J$  = 14.0, 6.8 Hz, 1H), 0.30 (t,  $J$  = 7.2 Hz, 3H). <sup>13</sup>C NMR (101 MHz, CDCl<sub>3</sub>)  $\delta$  169.0, 157.4, 135.2, 134.2, 132.1, 131.1, 130.5, 130.1, 129.8, 128.8, 128.8, 125.6, 125.5, 125.0, 122.9, 118.5, 93.0, 90.9, 80.1, 72.8, 60.6, 12.9. HRMS (ESI)  $m/z$ : [M + H]<sup>+</sup> Calcd for C<sub>24</sub>H<sub>20</sub>NO<sub>3</sub> 370.1438; Found 370.1435.

## 7. X-ray Crystallography of **3aa**

Compound **3aa** (40 mg) was dissolved in 10 mL of dichloromethane/n-hexane (v/v = 1:3), and it was crystallized to give crystal as a colorless block-shaped crystal after the solvent was slowly volatilized in 4 days at room temperature (~ 30 °C).

Data were measured using  $\phi$  and  $\omega$  scans using CuK $\alpha$  radiation. The maximum resolution that was achieved was  $\theta$  = 74.610° (0.80 Å). The unit cell was refined using **SAINT** (Bruker, V8.37A, after 2013) on 5629 reflections, 23% of the observed reflections. The final completeness is 99.70 % out to 74.610° in  $\theta$ . CCDC-2025268 (**3aa**) contain the supplementary crystallographic data. These data can be obtained free of charge from the Cambridge Crystallographic Data Centre (<http://www.ccdc.cam.ac.uk/>). X-ray crystallographic data for **3aa** is available as Figure S1

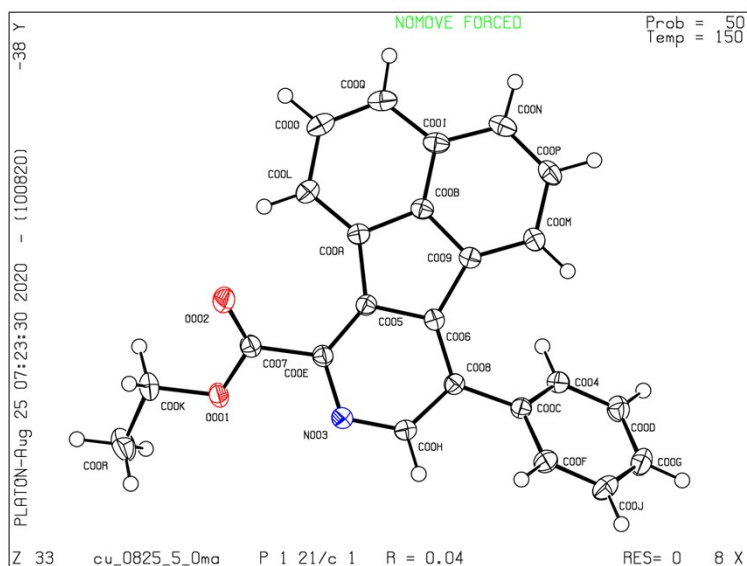

**Figure S1.** X-ray crystallographic for **3aa**

**Table S2.** Crystal Data and Structure Refinement for **3aa**.

| Compound                     | <b>3aa</b>                                      |
|------------------------------|-------------------------------------------------|
| Formula                      | C <sub>24</sub> H <sub>17</sub> NO <sub>2</sub> |
| $D_{calc.}/g\text{ cm}^{-3}$ | 1.378                                           |
| $m/\text{mm}^{-1}$           | 0.697                                           |
| Formula Weight               | 351.38                                          |
| Colour                       | colourless                                      |
| Shape                        | block                                           |
| Size/ $\text{mm}^3$          | 0.20×0.15×0.10                                  |
| $T/\text{K}$                 | 150.0                                           |
| Crystal System               | monoclinic                                      |
| Space Group                  | $P2_1/c$                                        |
| $a/\text{Å}$                 | 11.9988(3)                                      |
| $b/\text{Å}$                 | 19.1984(5)                                      |
| $c/\text{Å}$                 | 7.6672(2)                                       |
| $a^\circ$                    | 90                                              |
| $b^\circ$                    | 106.467(2)                                      |
| $g^\circ$                    | 90                                              |
| $V/\text{Å}^3$               | 1693.75(8)                                      |
| $Z$                          | 4                                               |
| $Z'$                         | 1                                               |
| Wavelength/ $\text{Å}$       | 1.54178                                         |
| Radiation type               | CuK <sub><math>\alpha</math></sub>              |
| $Q_{min}/^\circ$             | 3.841                                           |
| $Q_{max}/^\circ$             | 74.610                                          |
| Measured Refl's.             | 24320                                           |
| Ind't Refl's                 | 3446                                            |

---

|                      |        |
|----------------------|--------|
| Refl's with I > 2(I) | 2744   |
| $R_{int}$            | 0.0650 |
| Parameters           | 245    |
| Restraints           | 0      |
| Largest Peak         | 0.250  |
| Deepest Hole         | -0.307 |
| GooF                 | 1.095  |
| $wR_2$ (all data)    | 0.1241 |
| $wR_2$               | 0.1056 |
| $R_1$ (all data)     | 0.0586 |
| $R_1$                | 0.403  |

---

## 8. Reference :

- (1) Muthu Karuppasamy, B. S. Vachan, Perumal Vinoth, Isravel Muthukrishnan, et al., *Org. Lett.* **2019**, *21* (15), 5784-5788.
- (2) Tianyu Cheng, Yizhao Chen, Anjun Qin, and Ben Zhong Tang. *Macromolecules* **2018**, *51*, 5638–5645.

## 9. Copies of NMR Spectrum

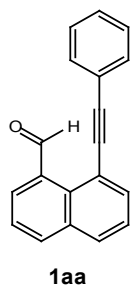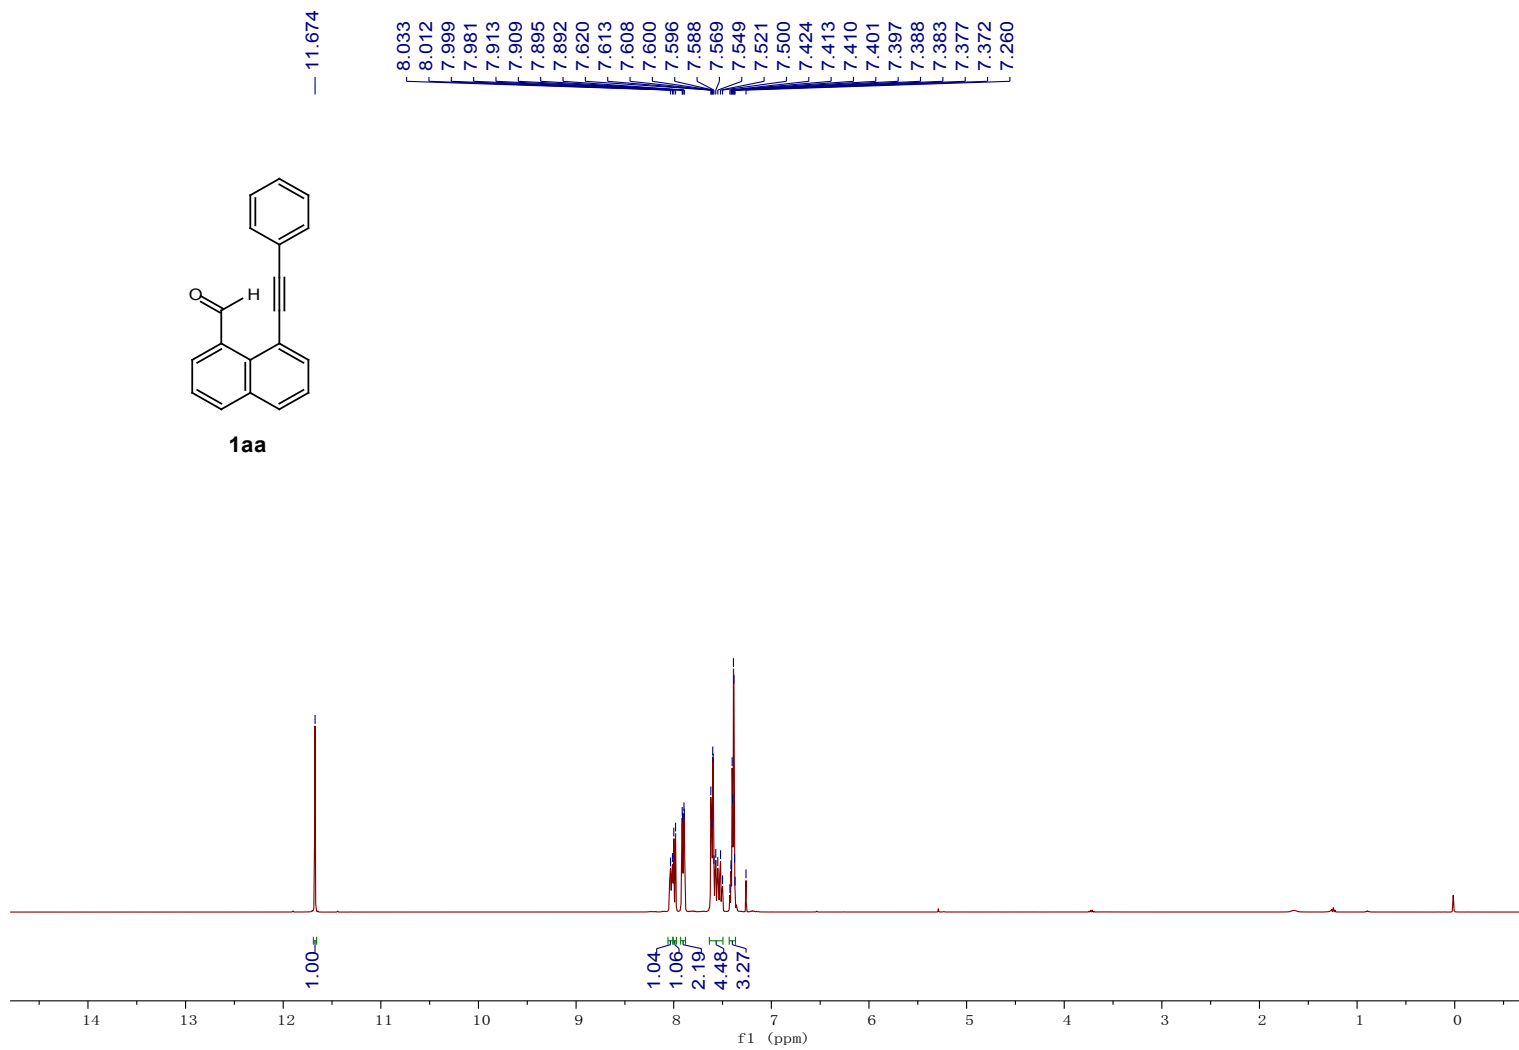



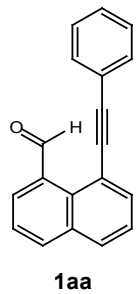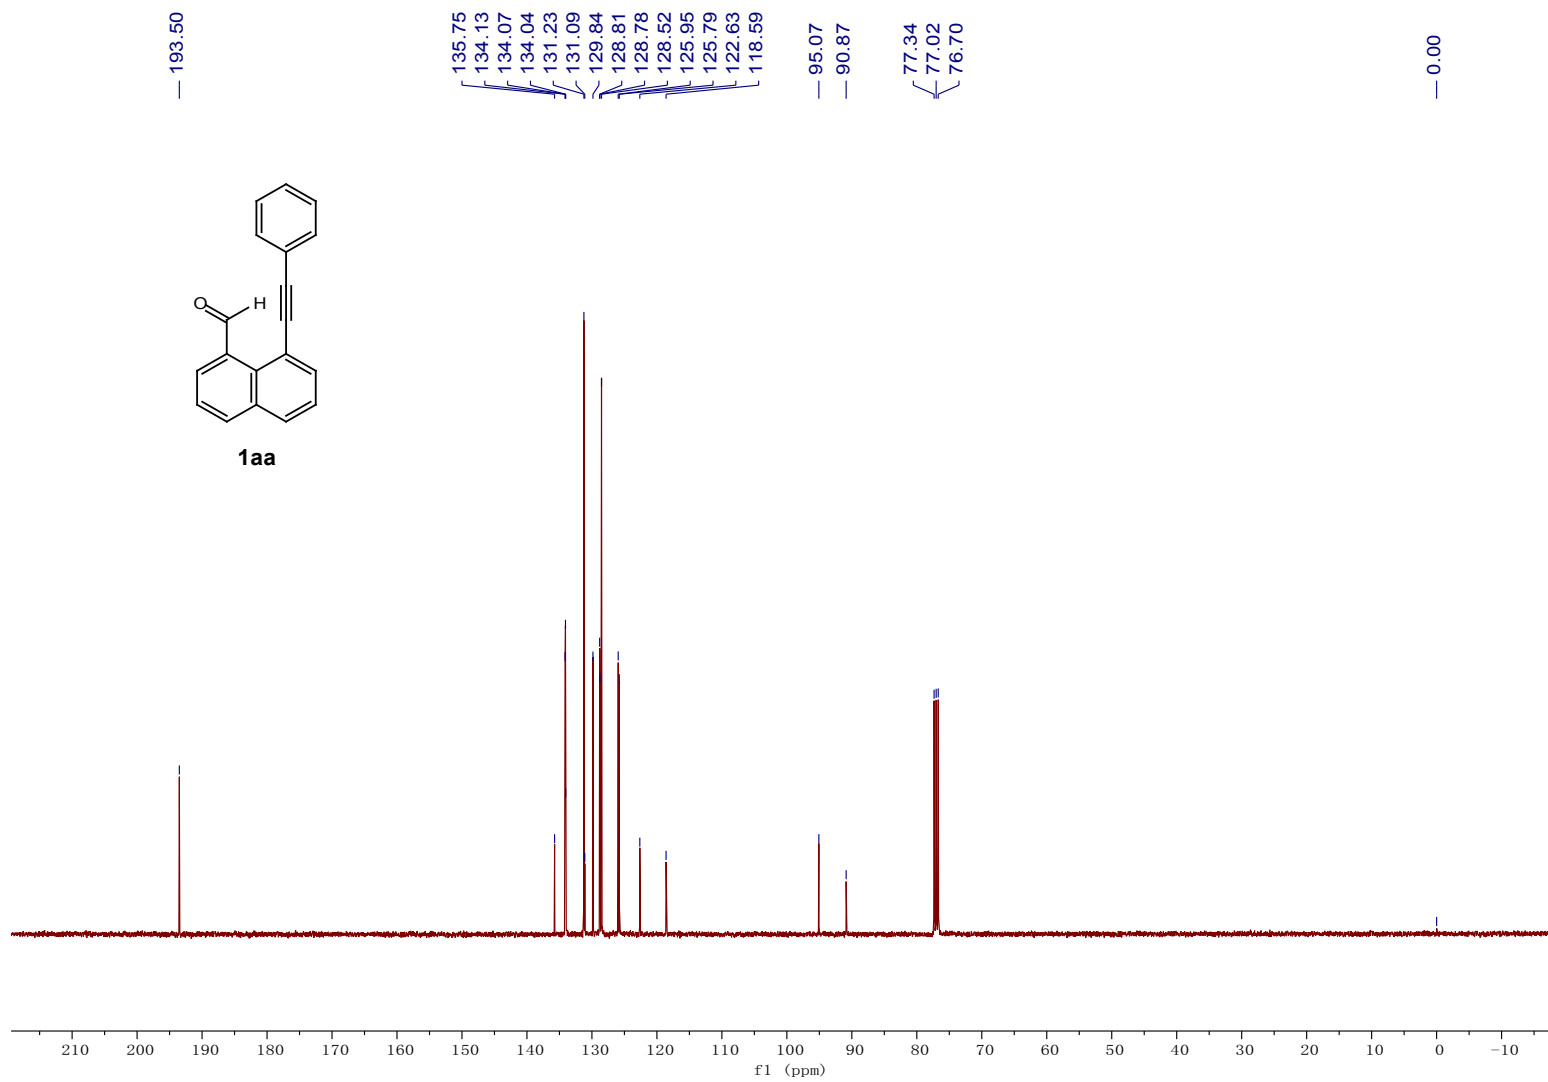

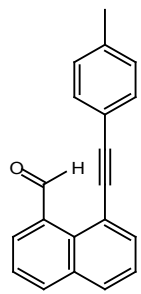

**1ab**

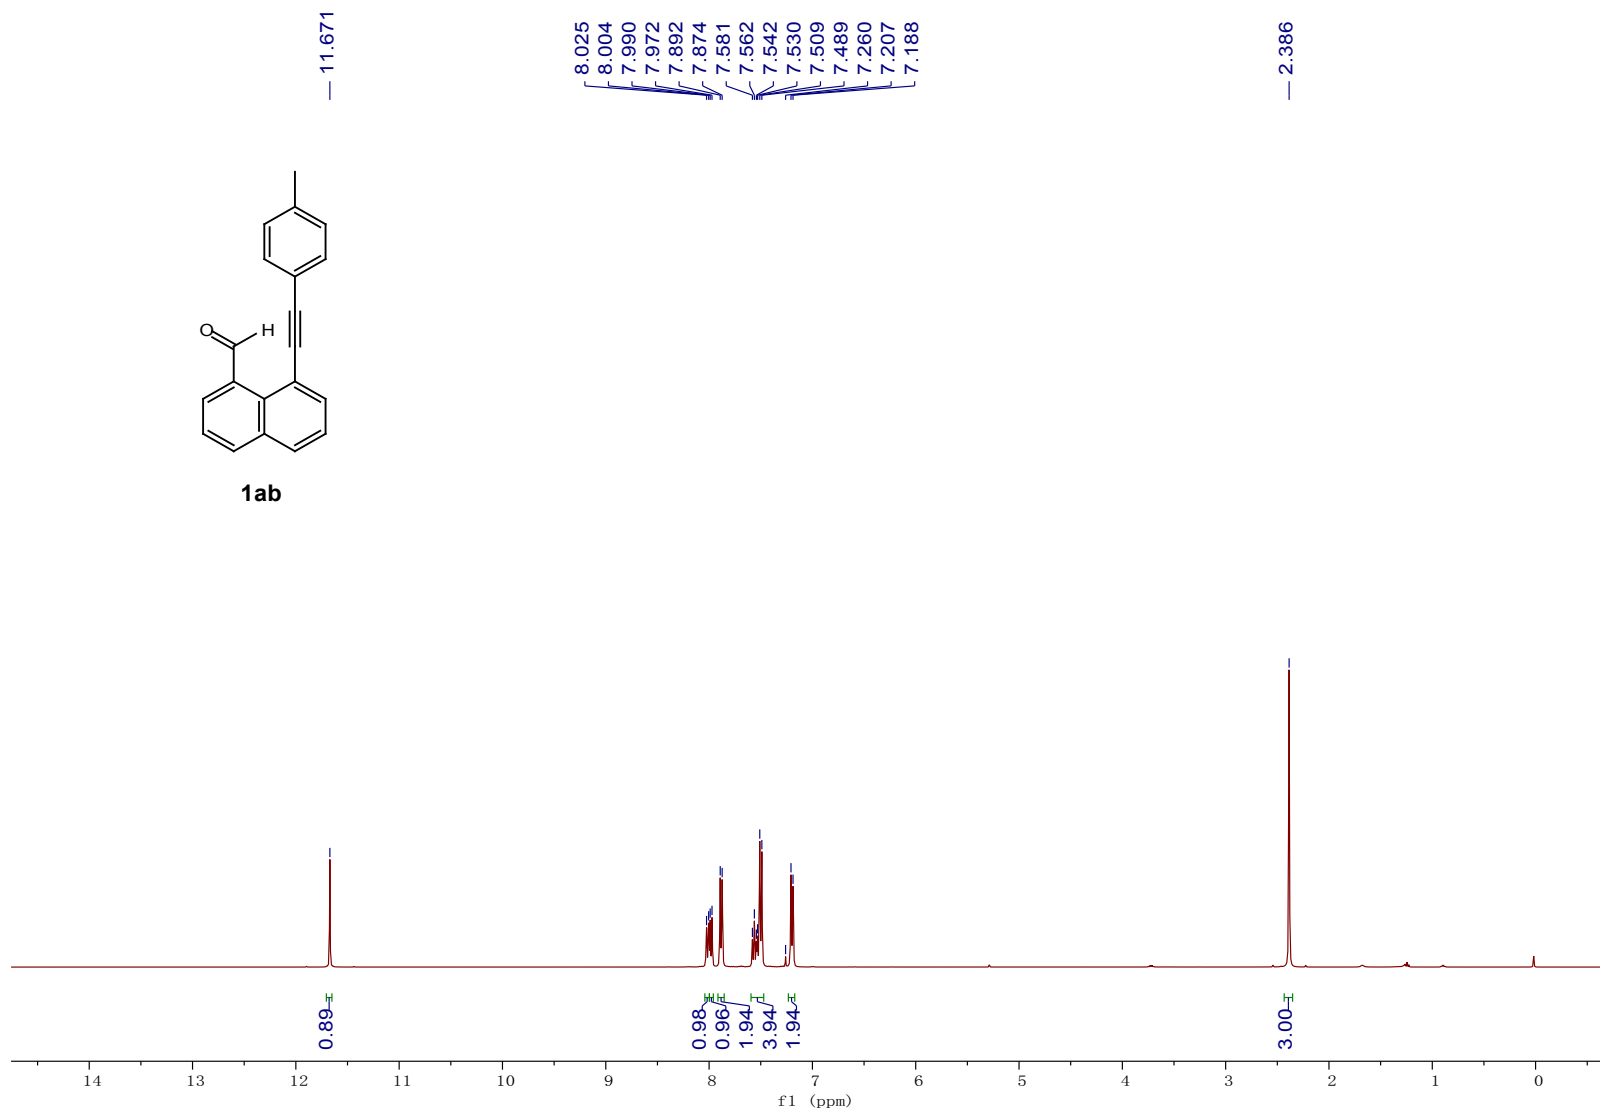

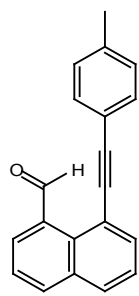

**1ab**

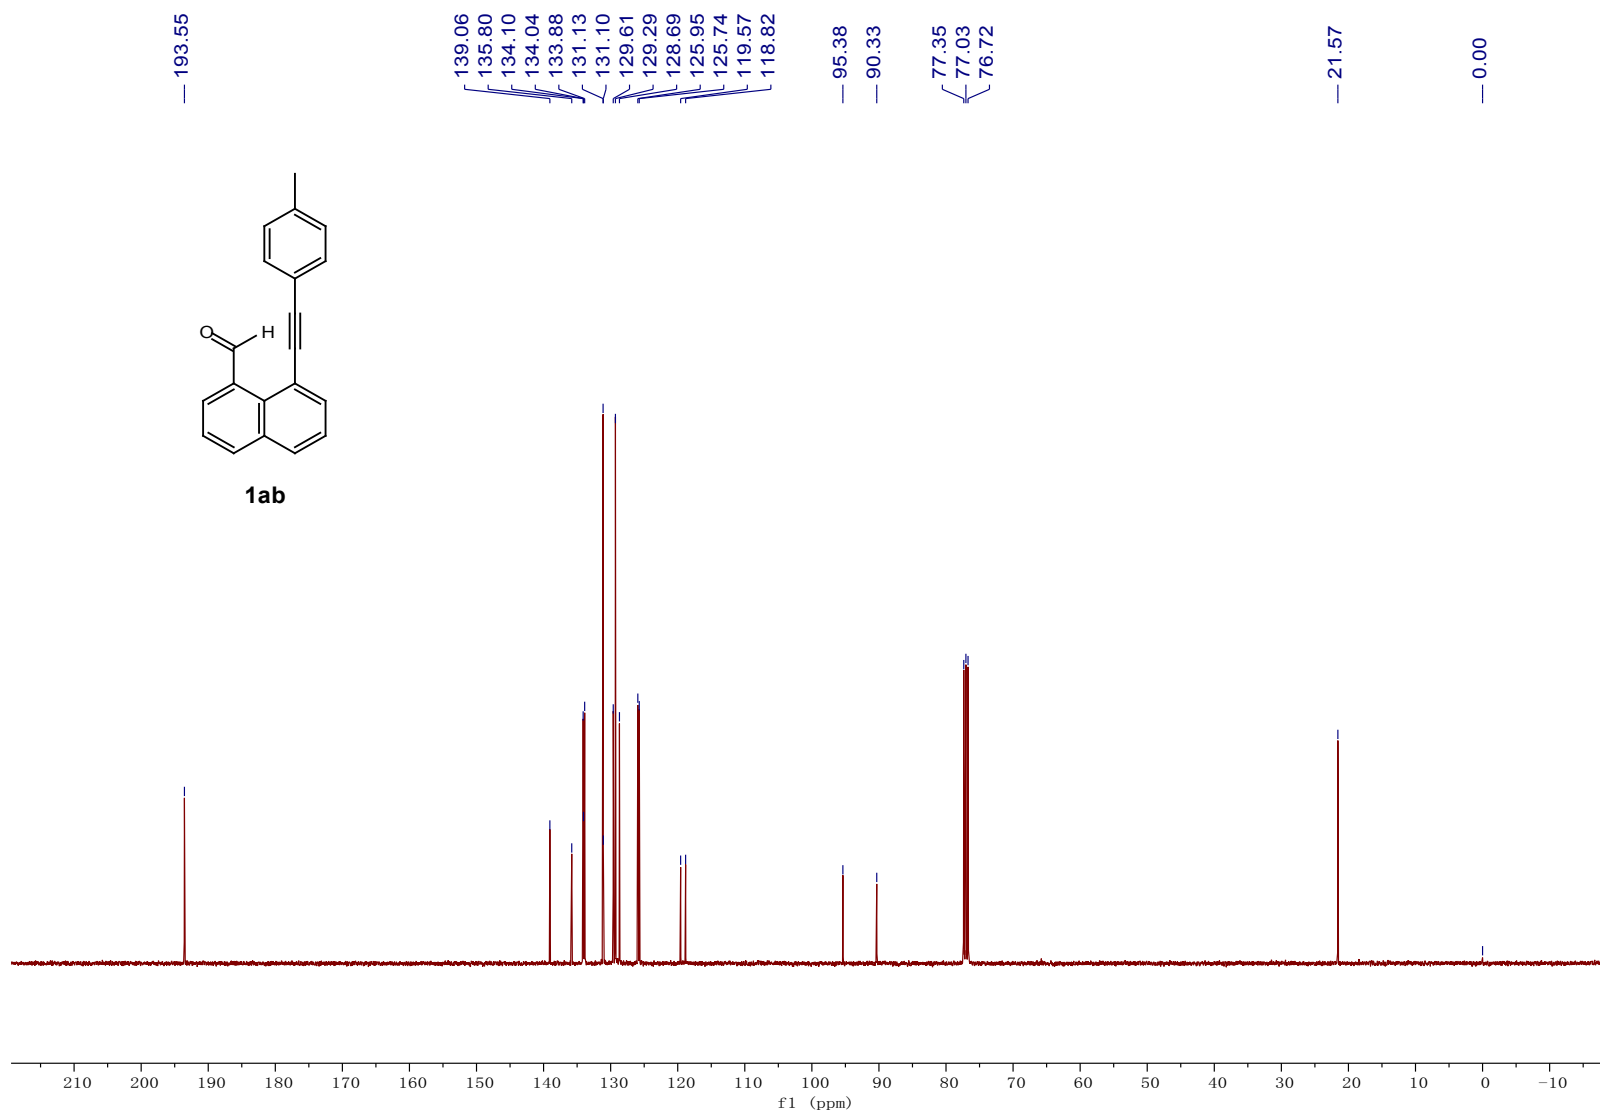

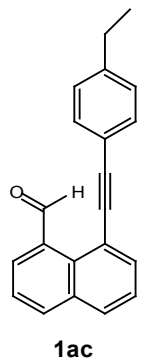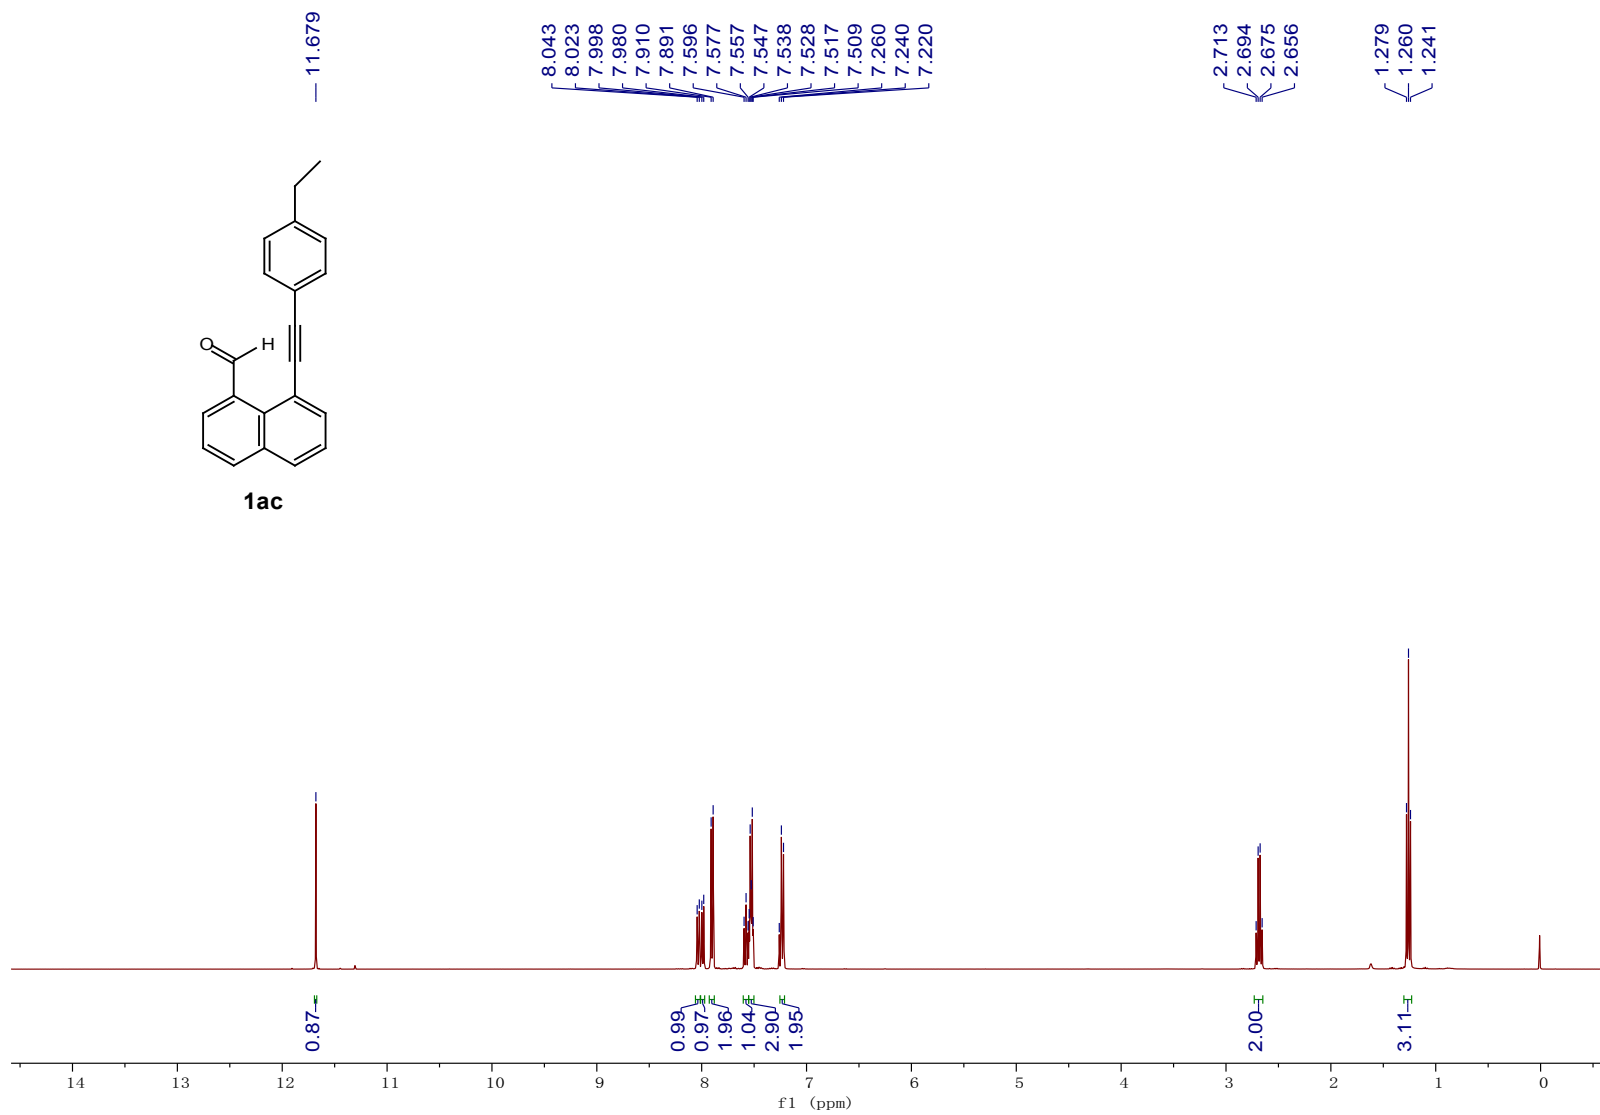

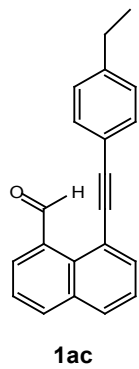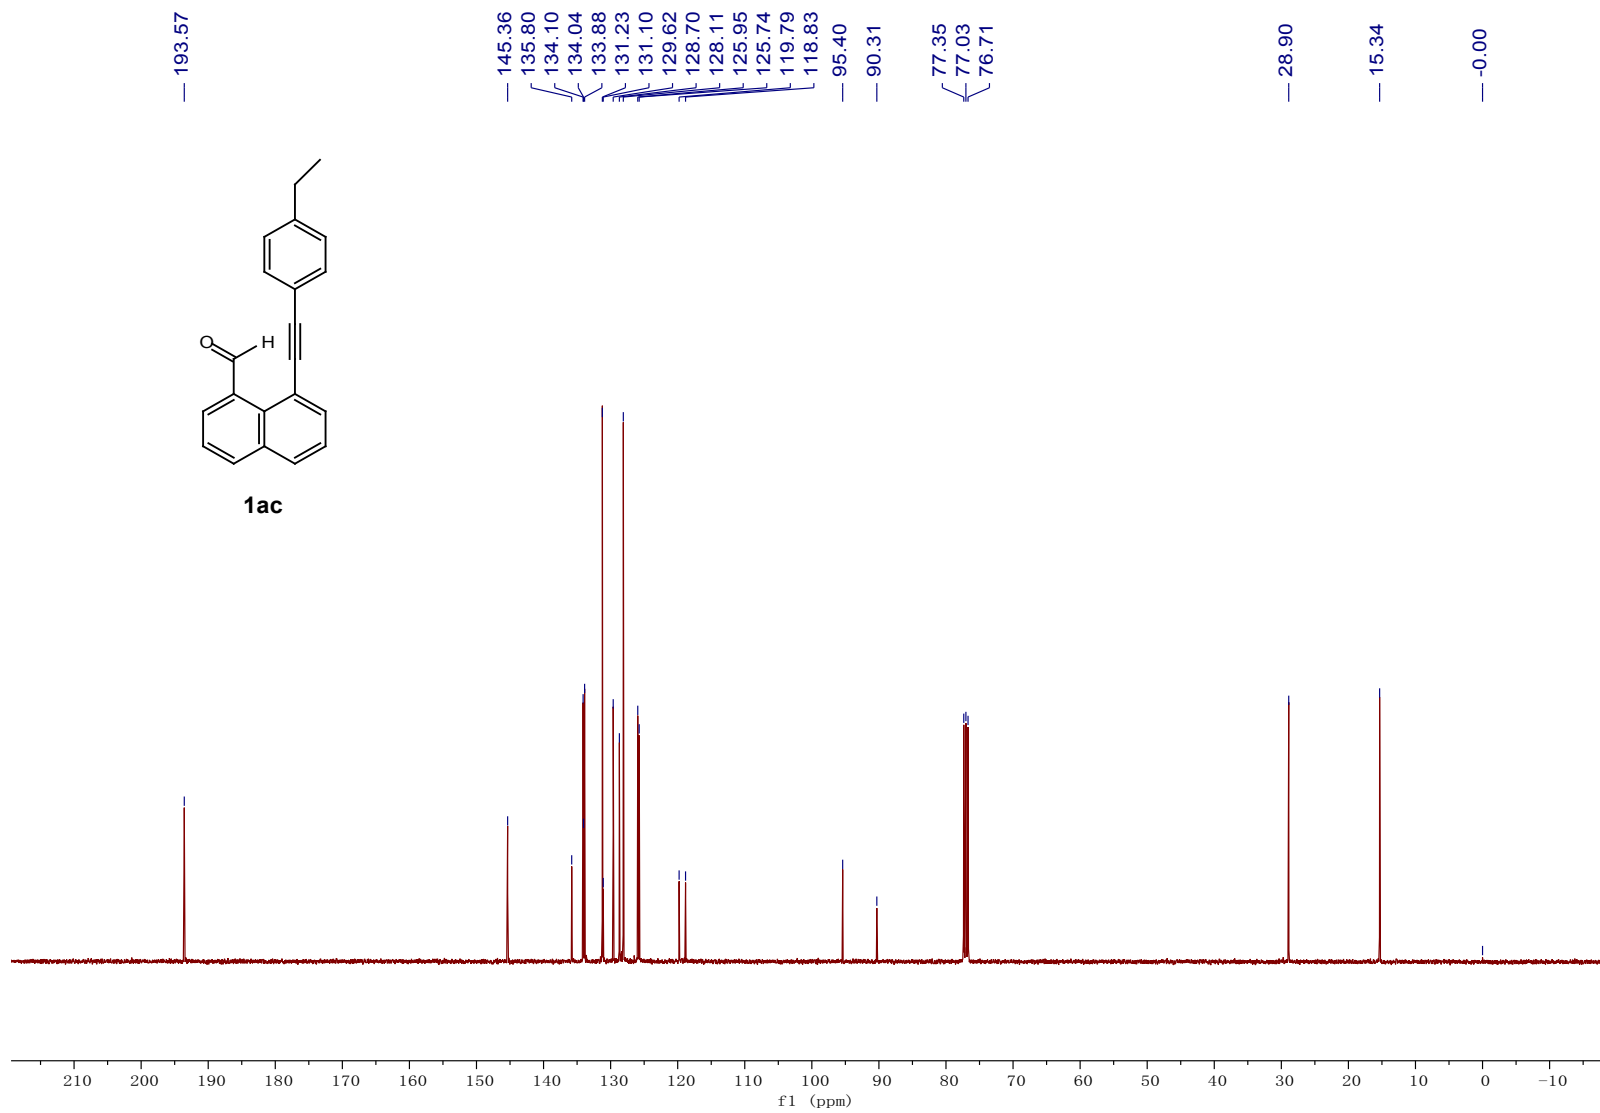

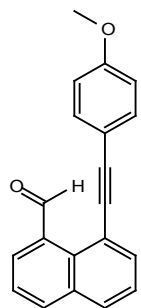

**1ad**

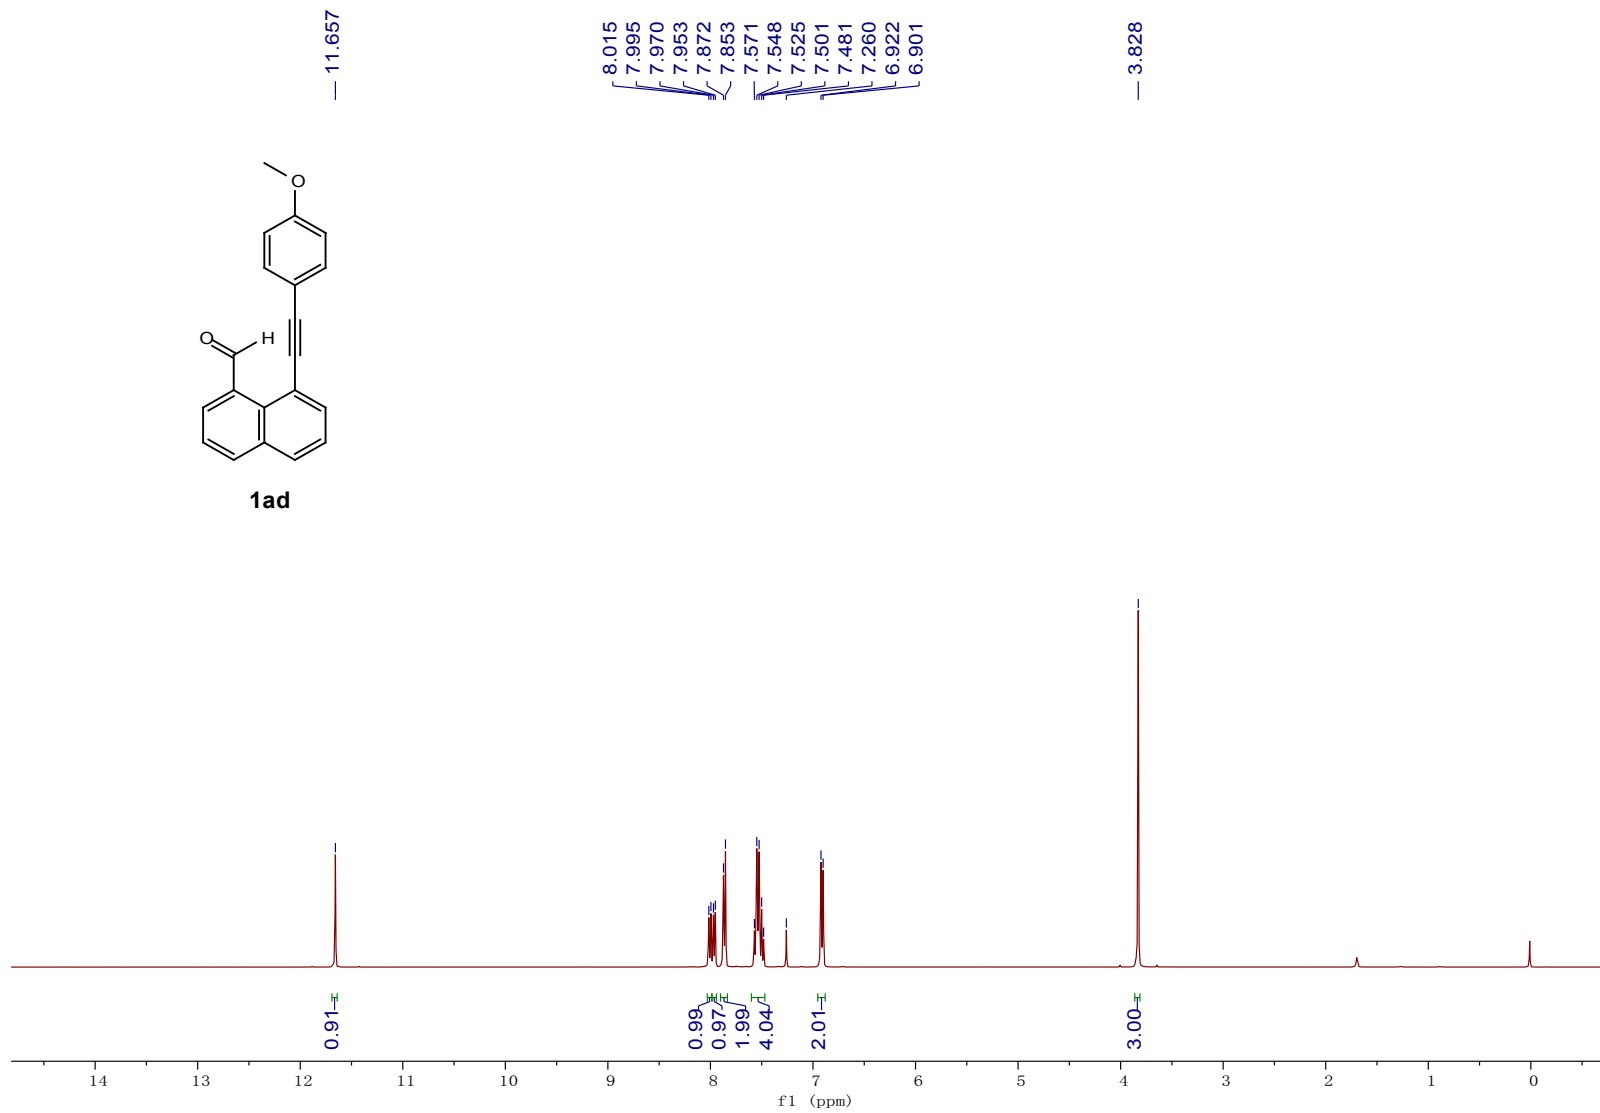



**1ad**

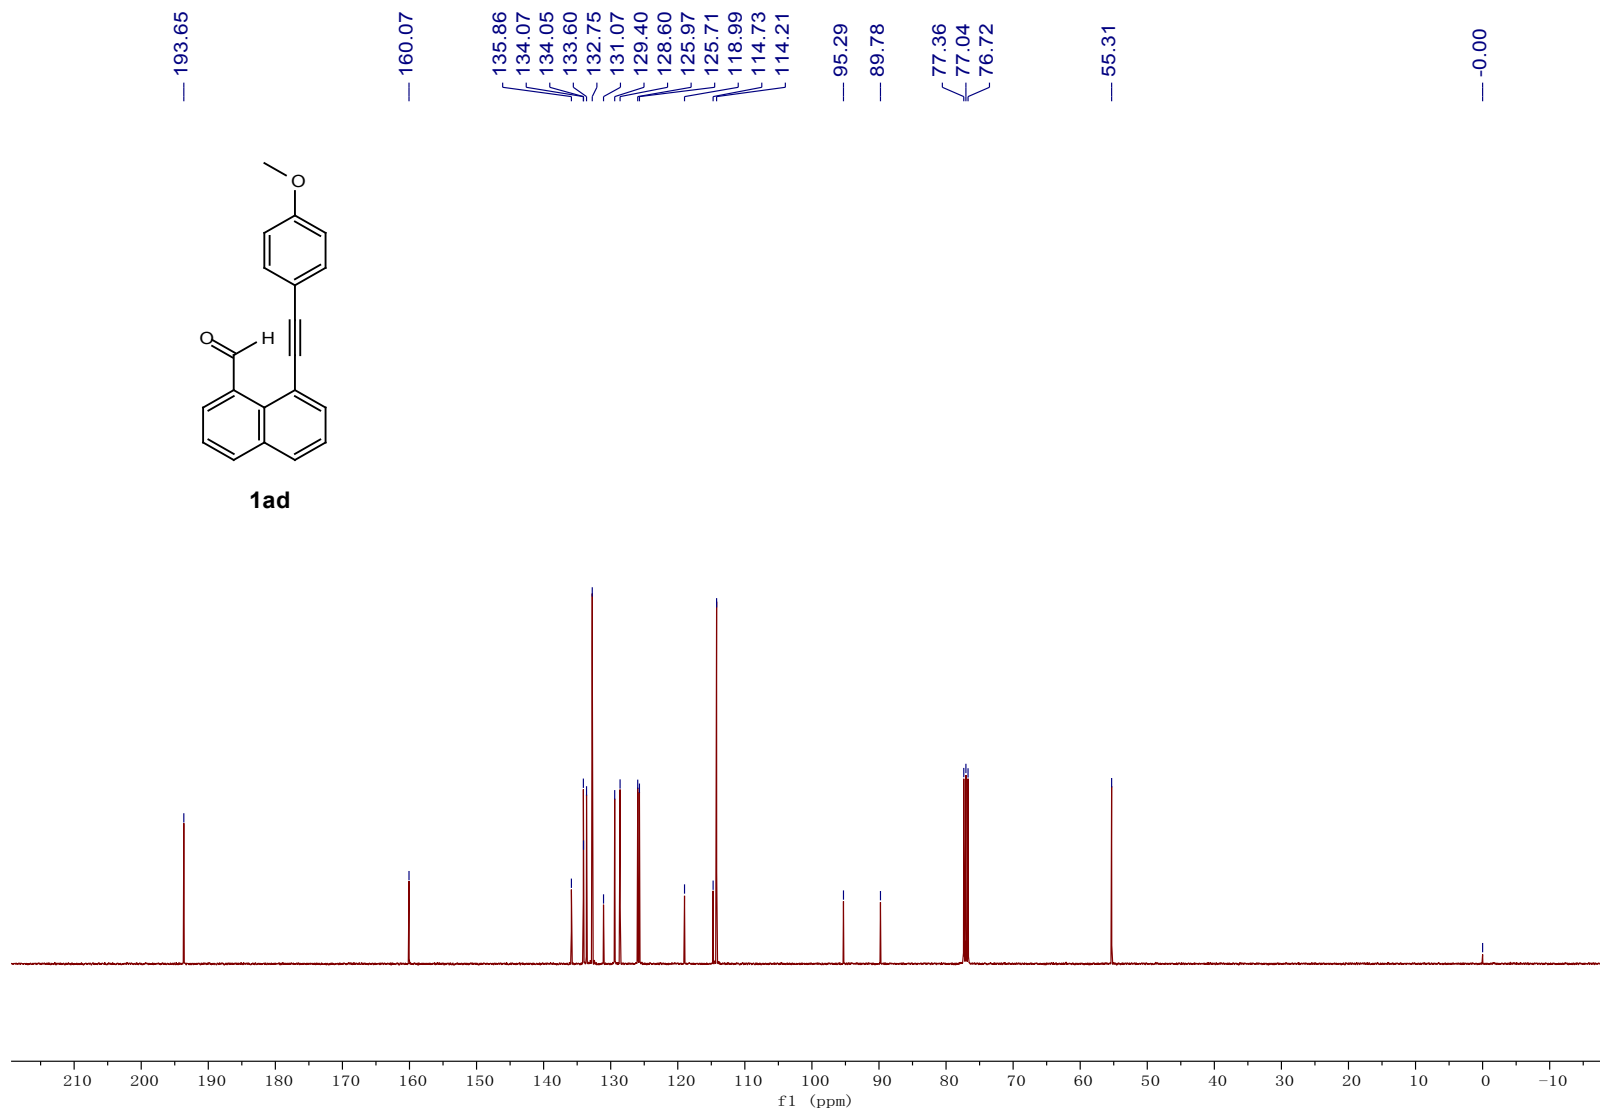

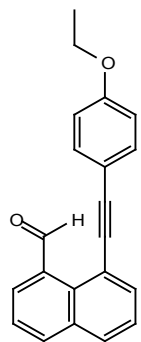

1ae

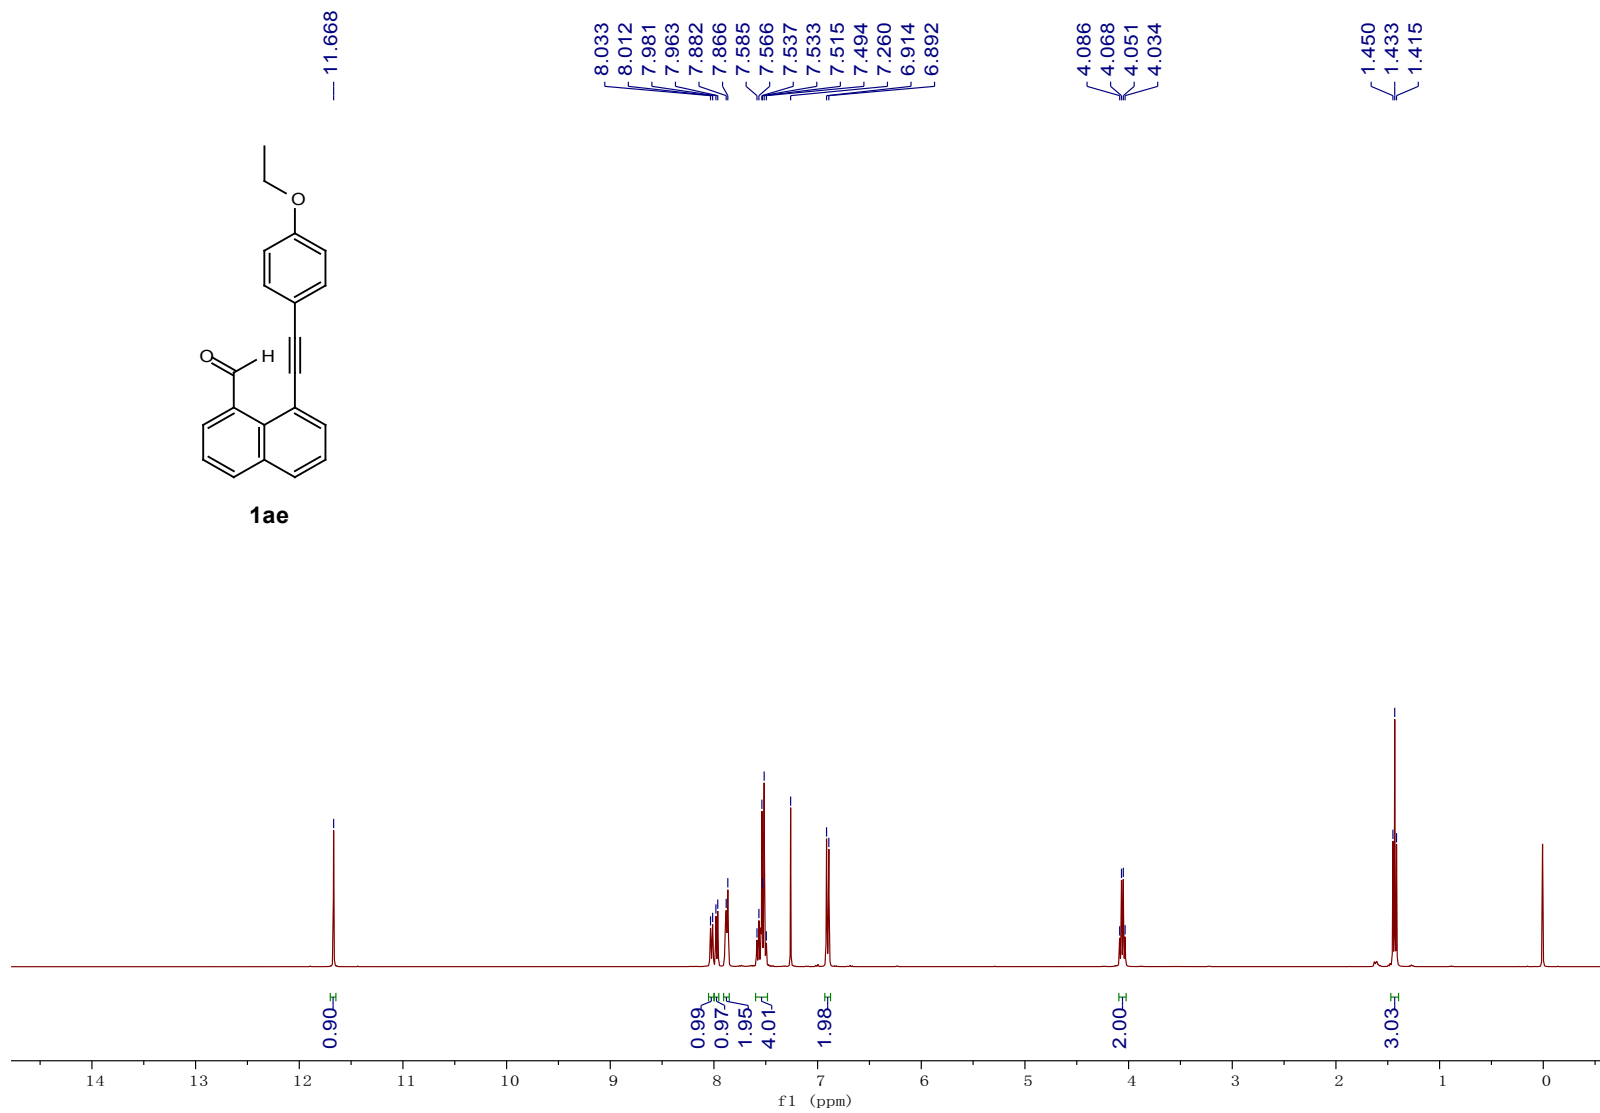



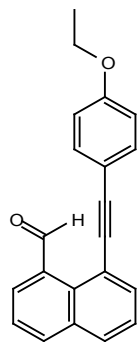

**1ae**

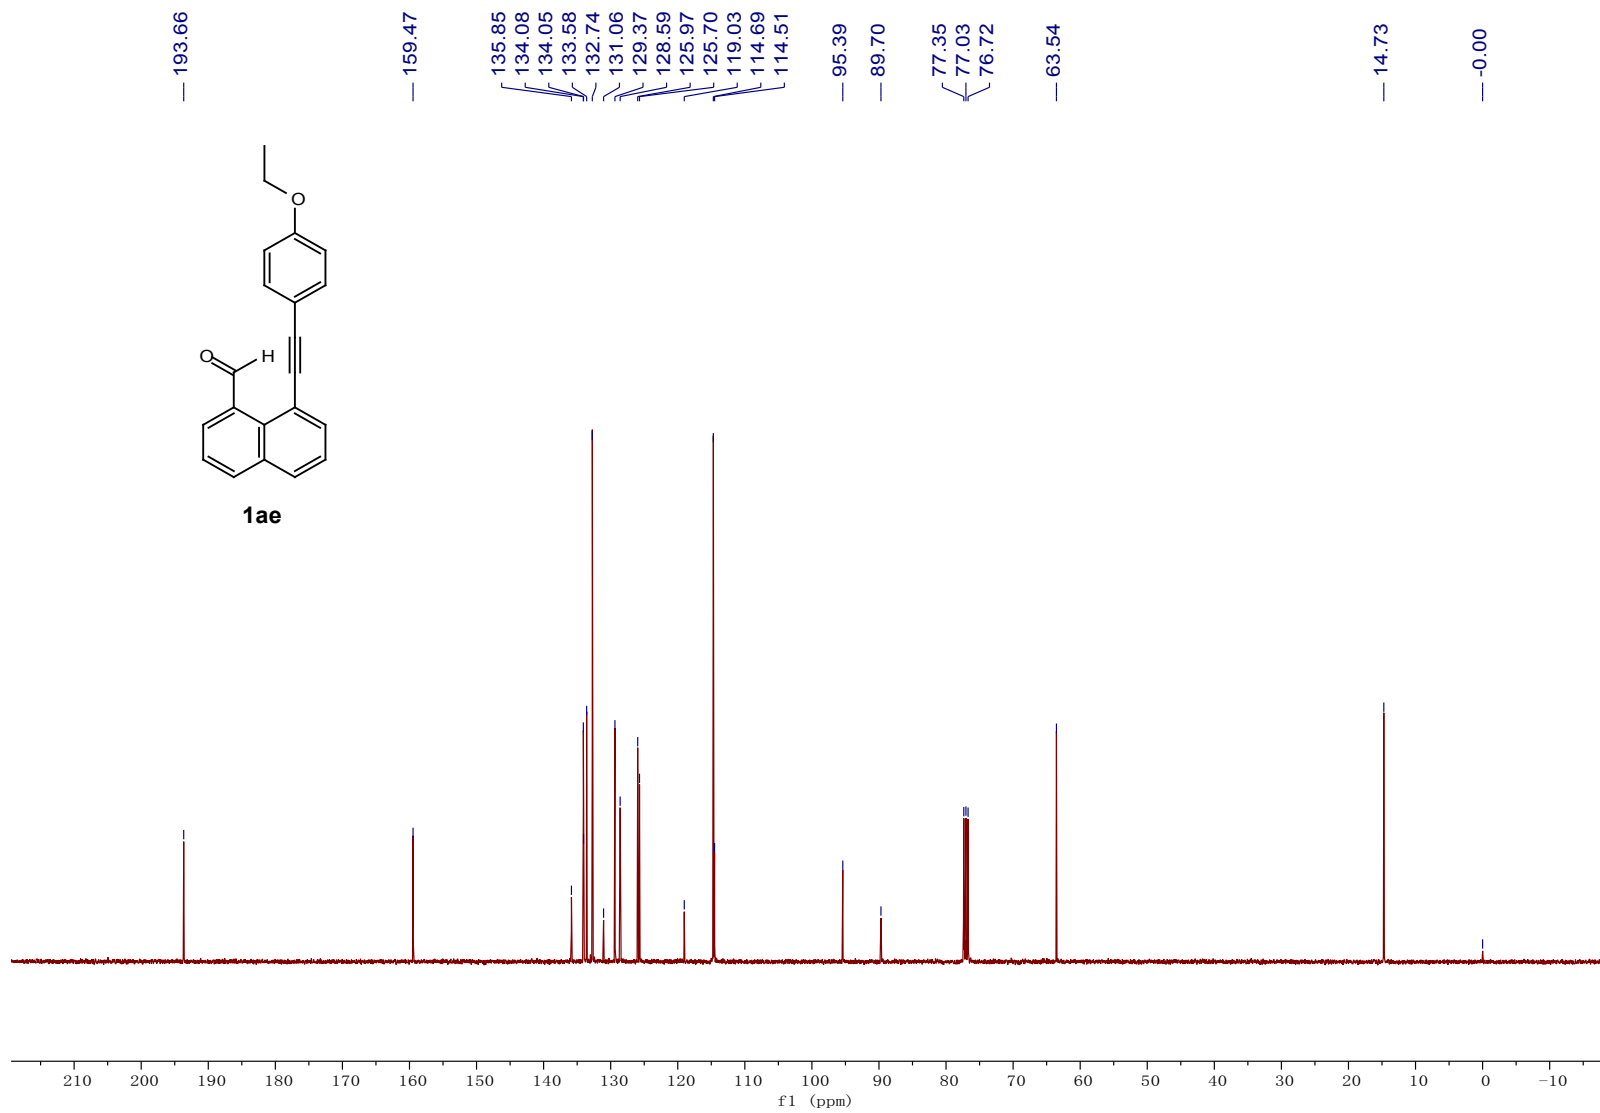

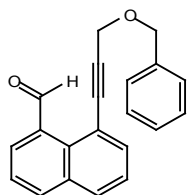

**1af**

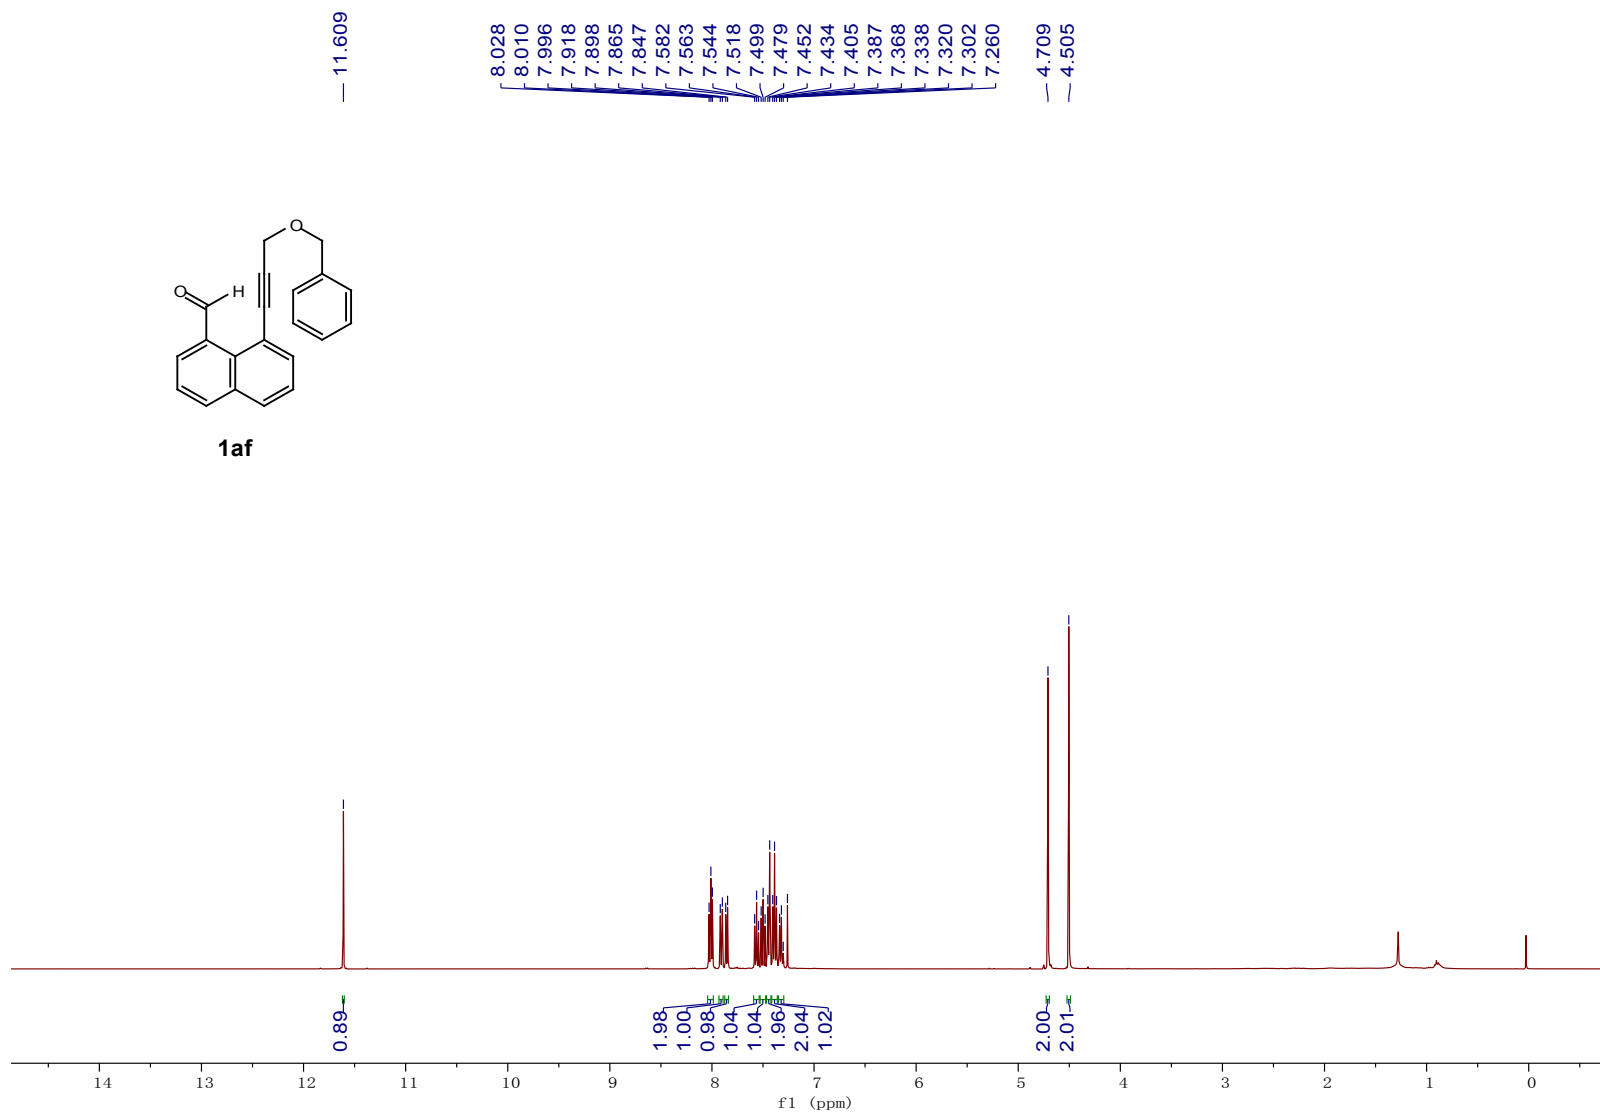

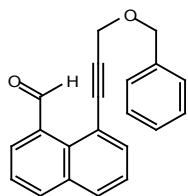

**1af**

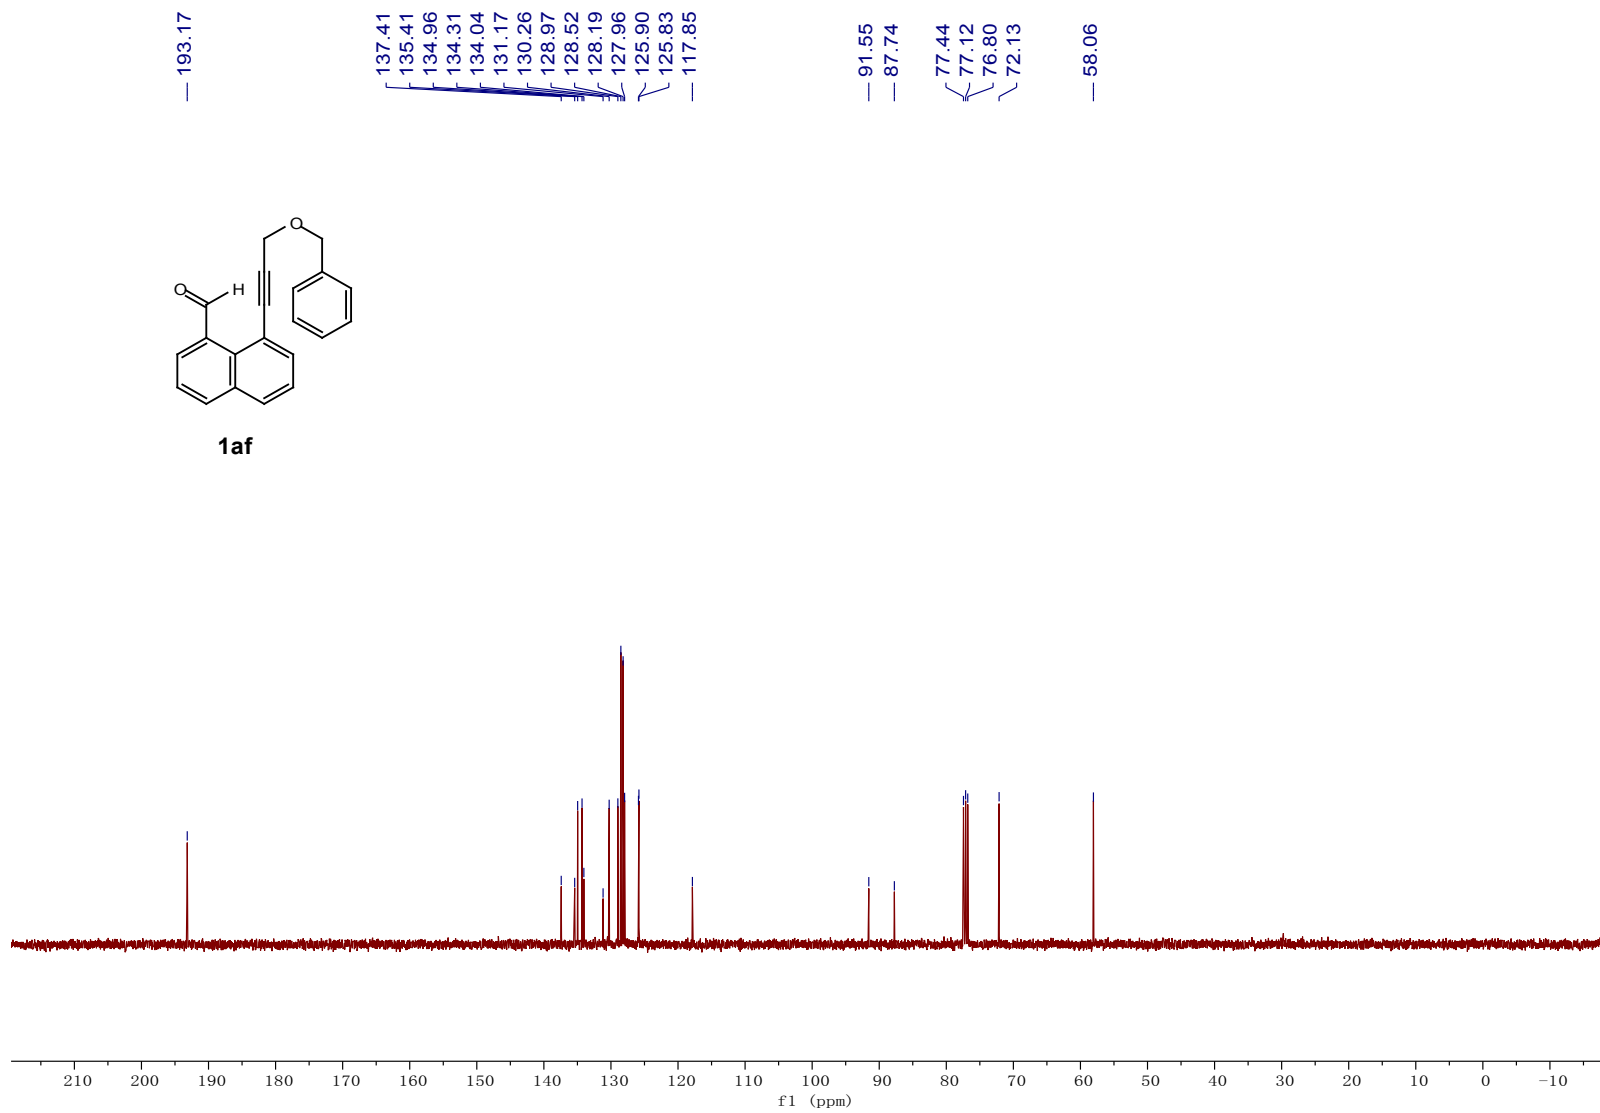

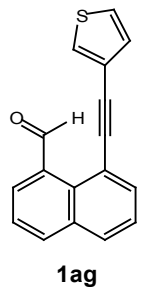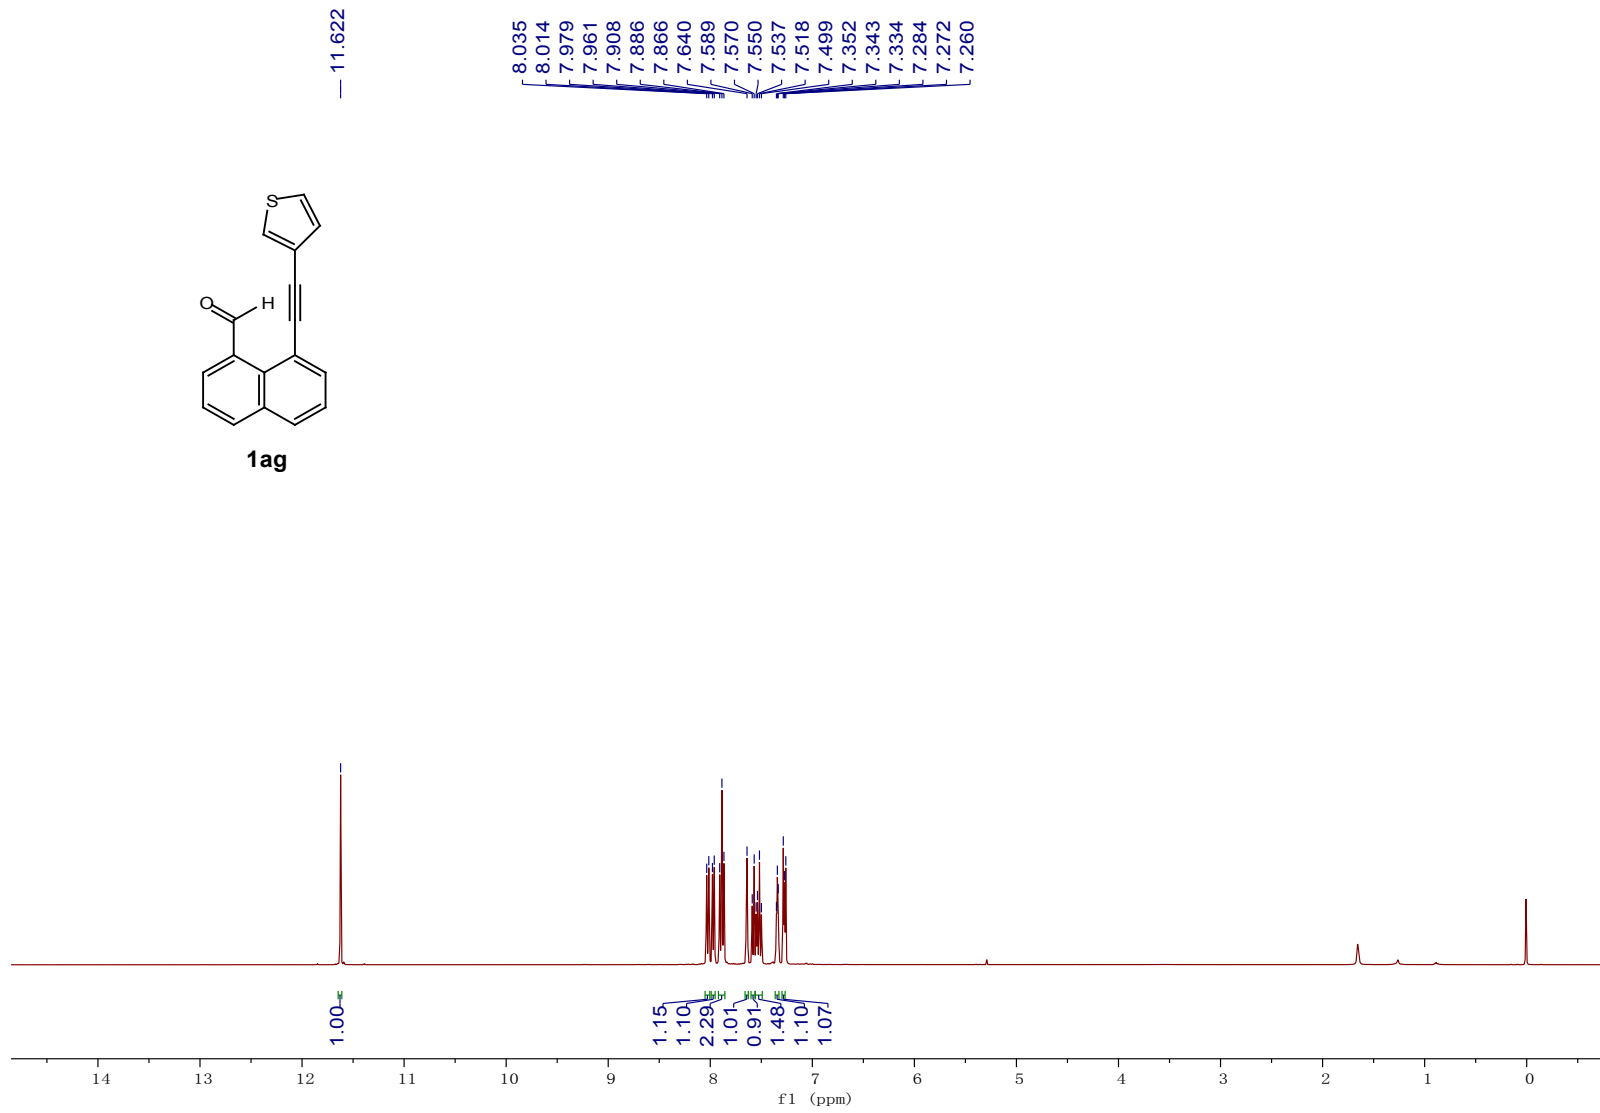

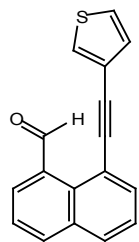

**1ag**

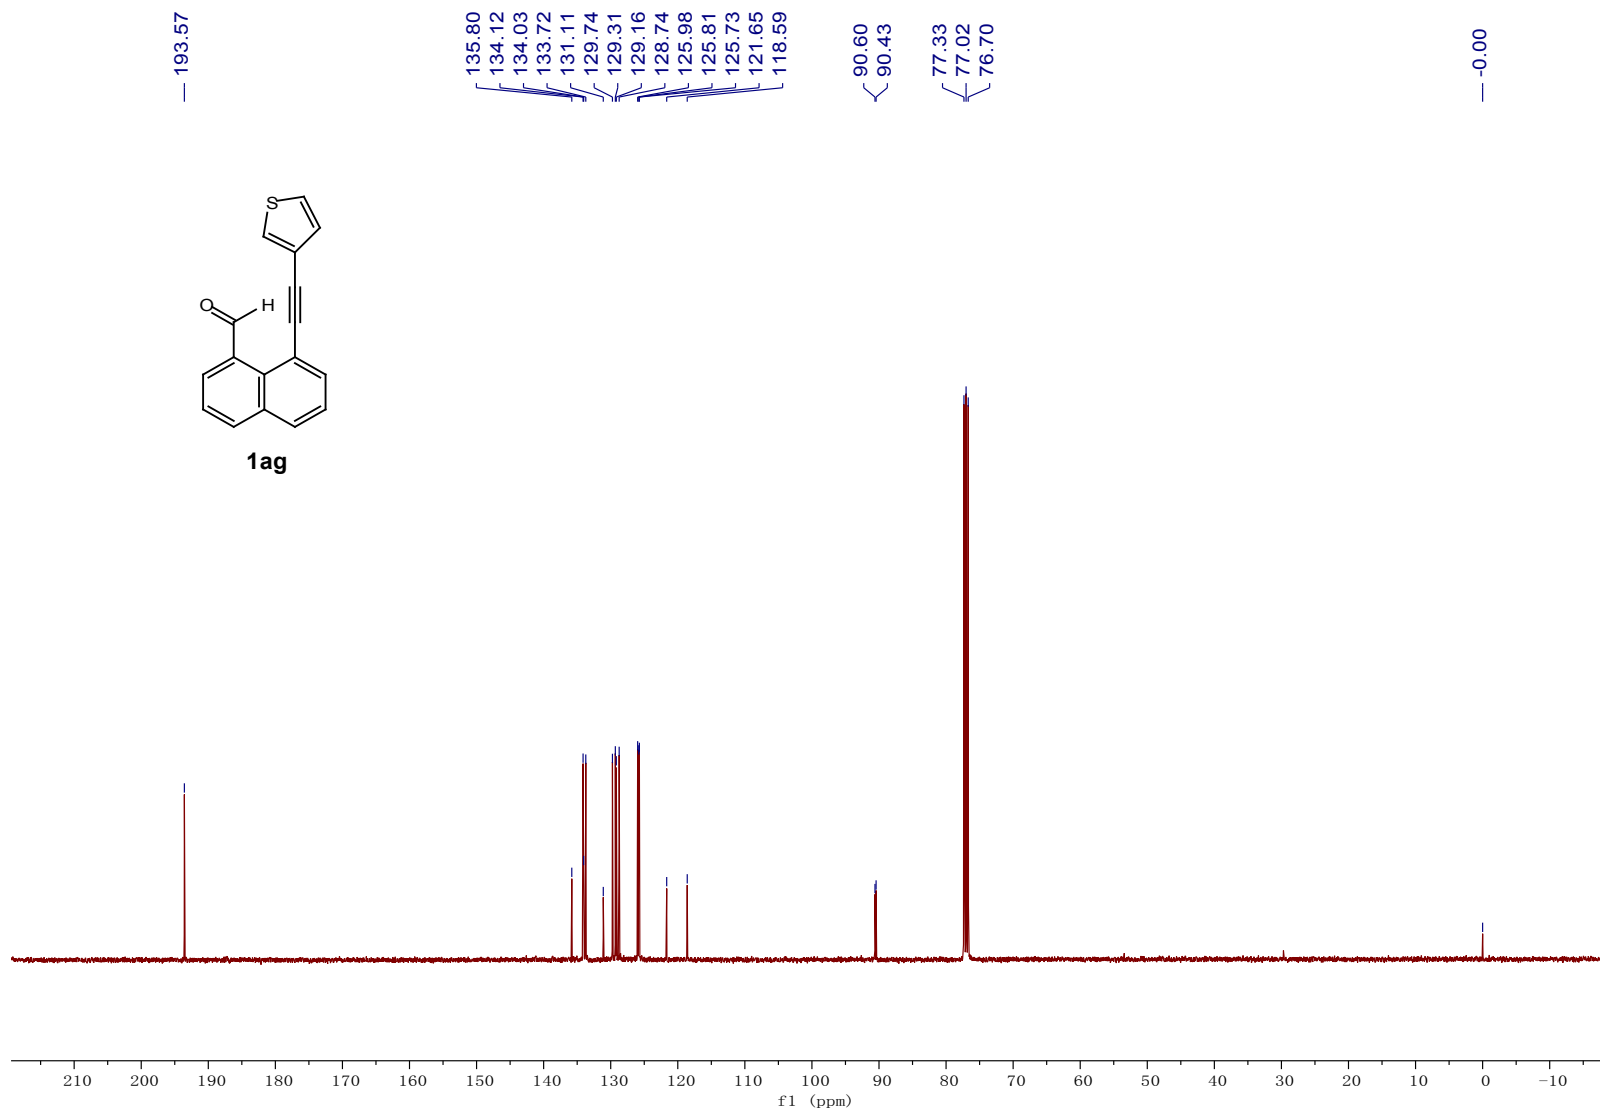

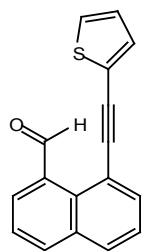

1ah

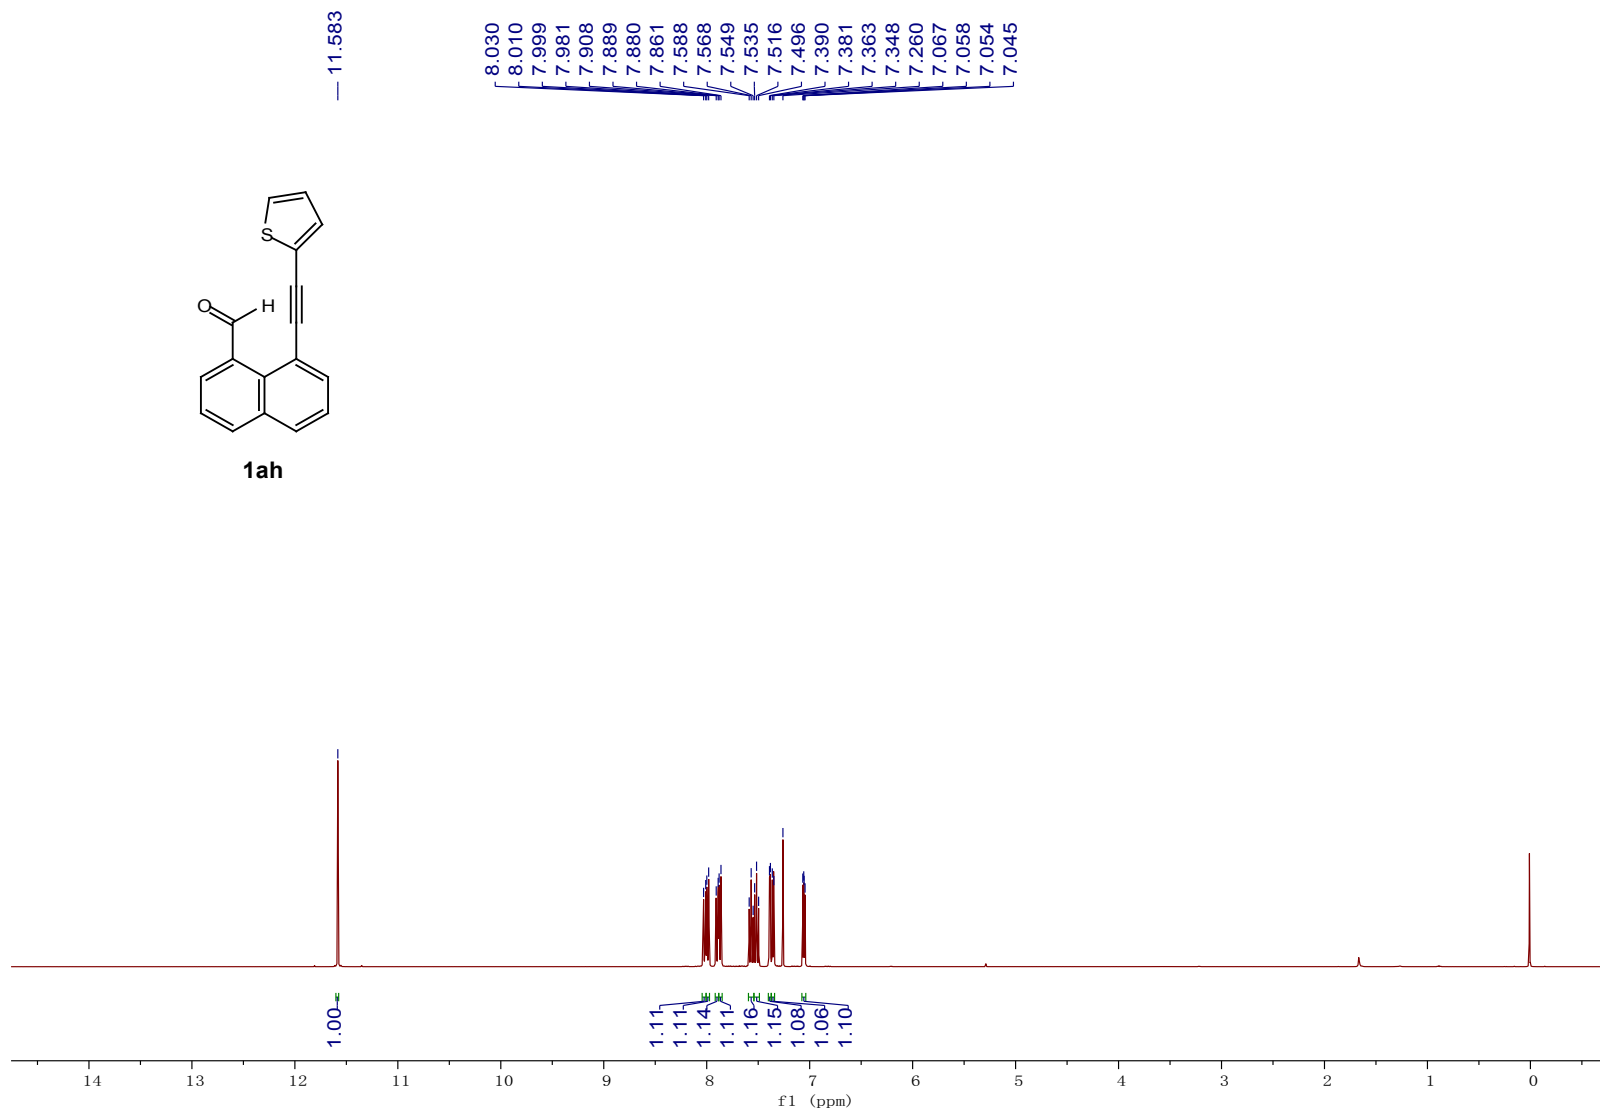



**1ah**

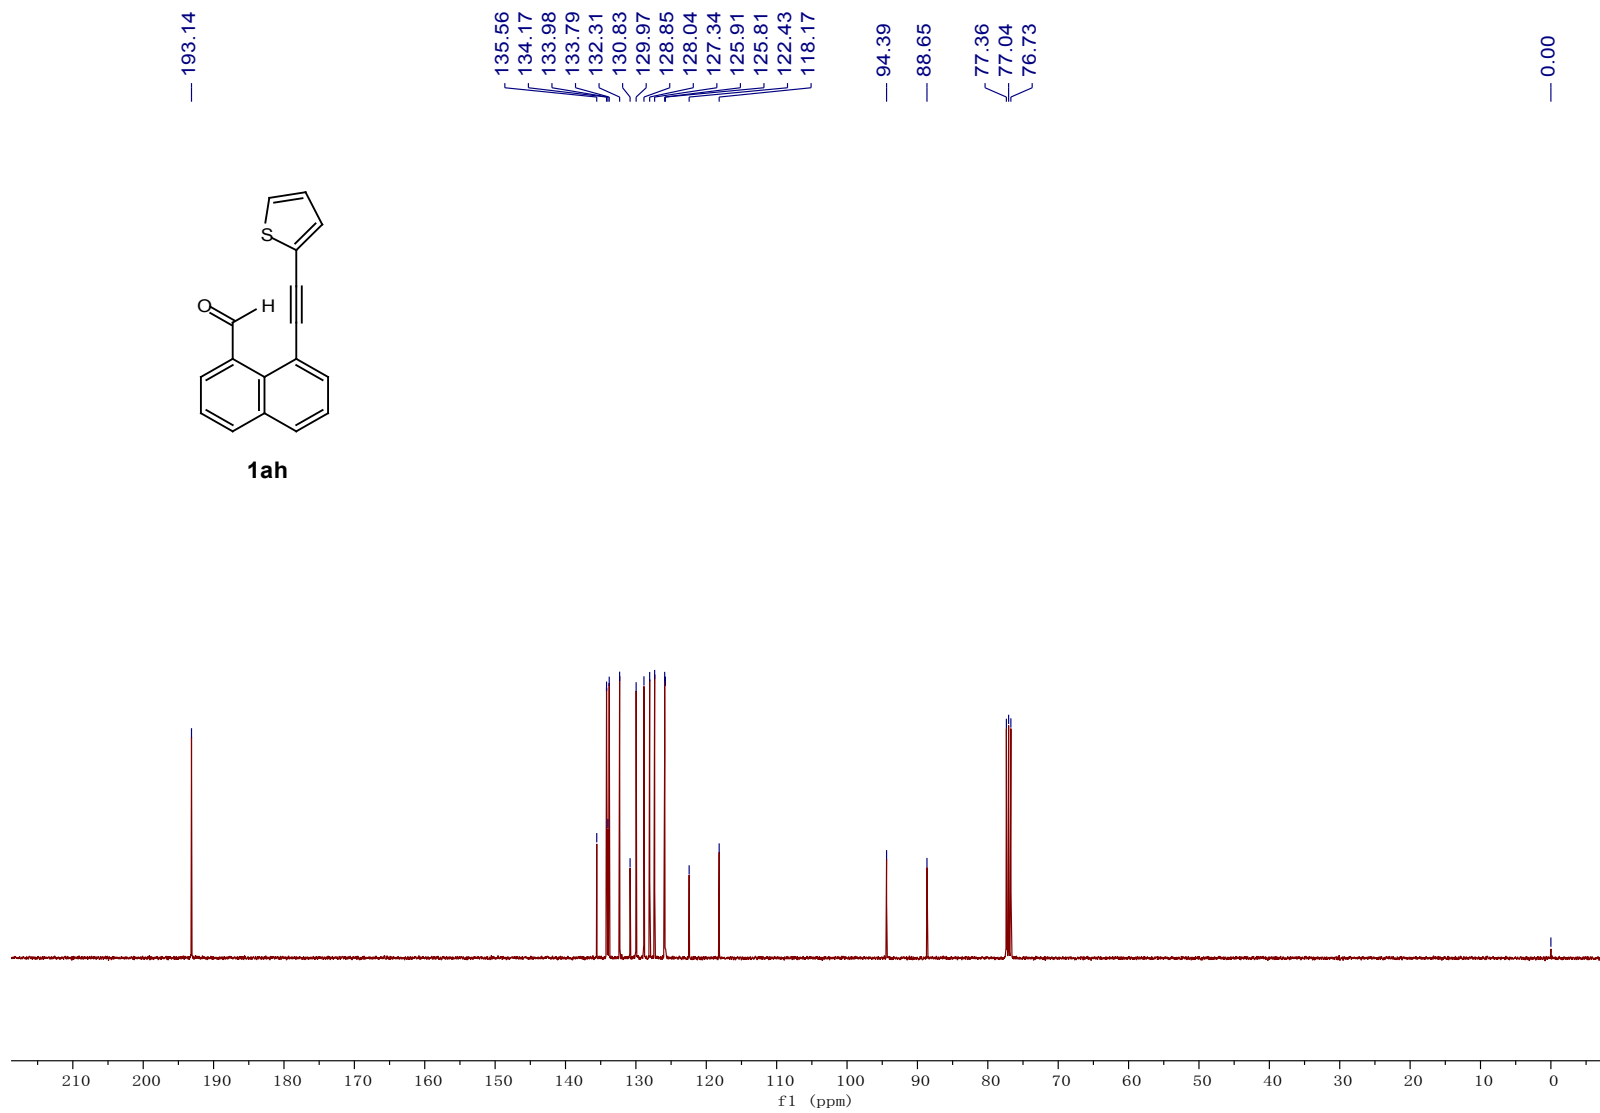

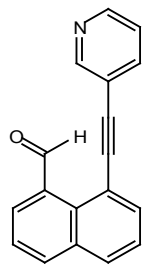

**1ai**

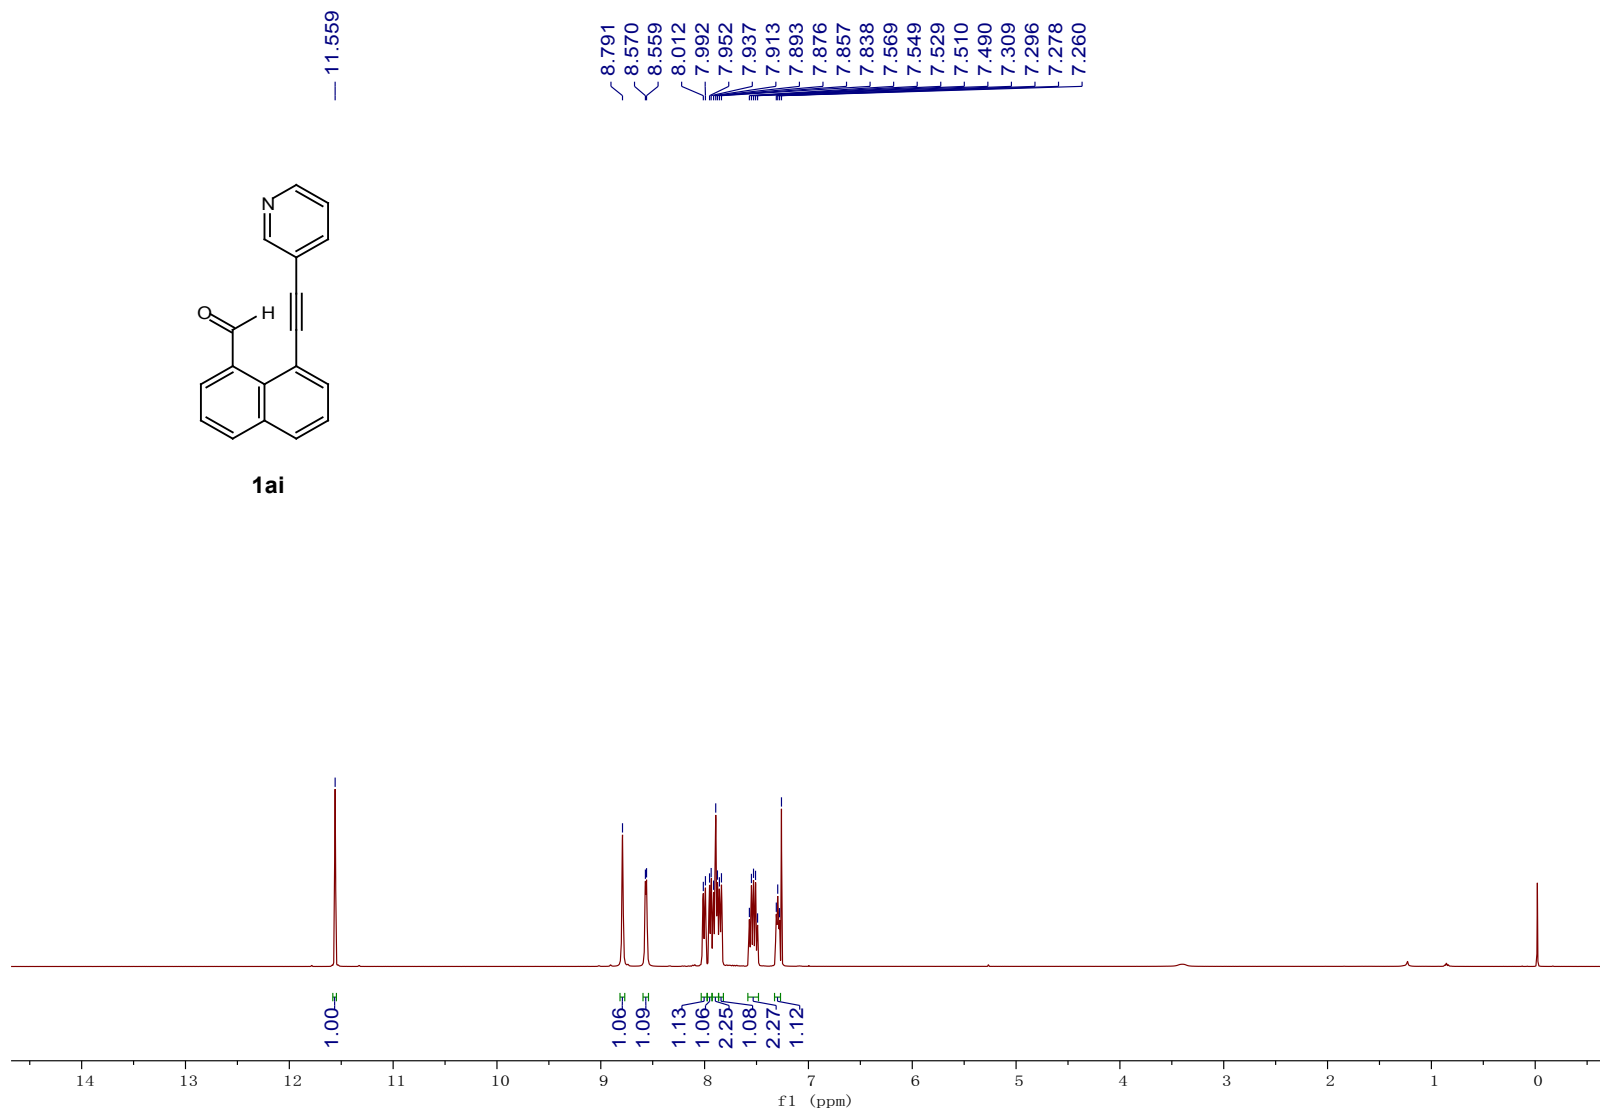



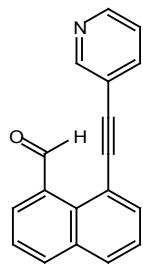

**1ai**

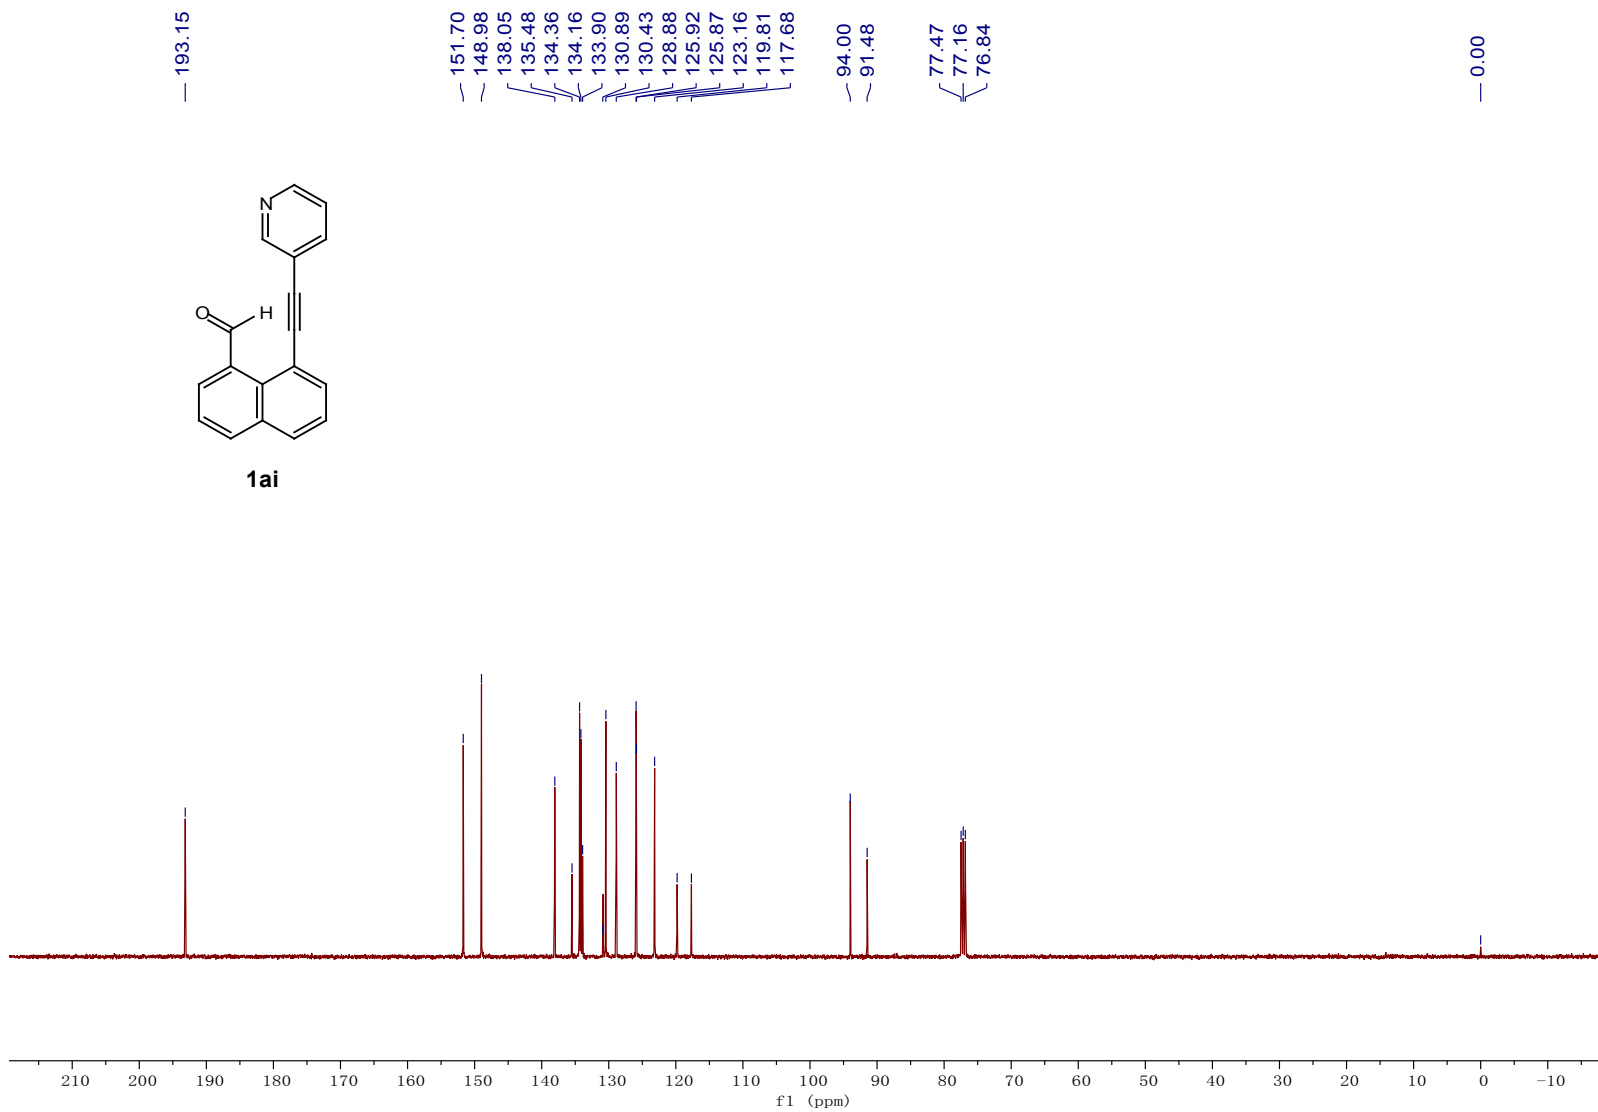

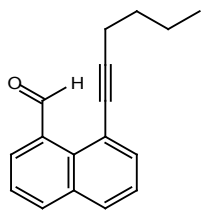

1aj

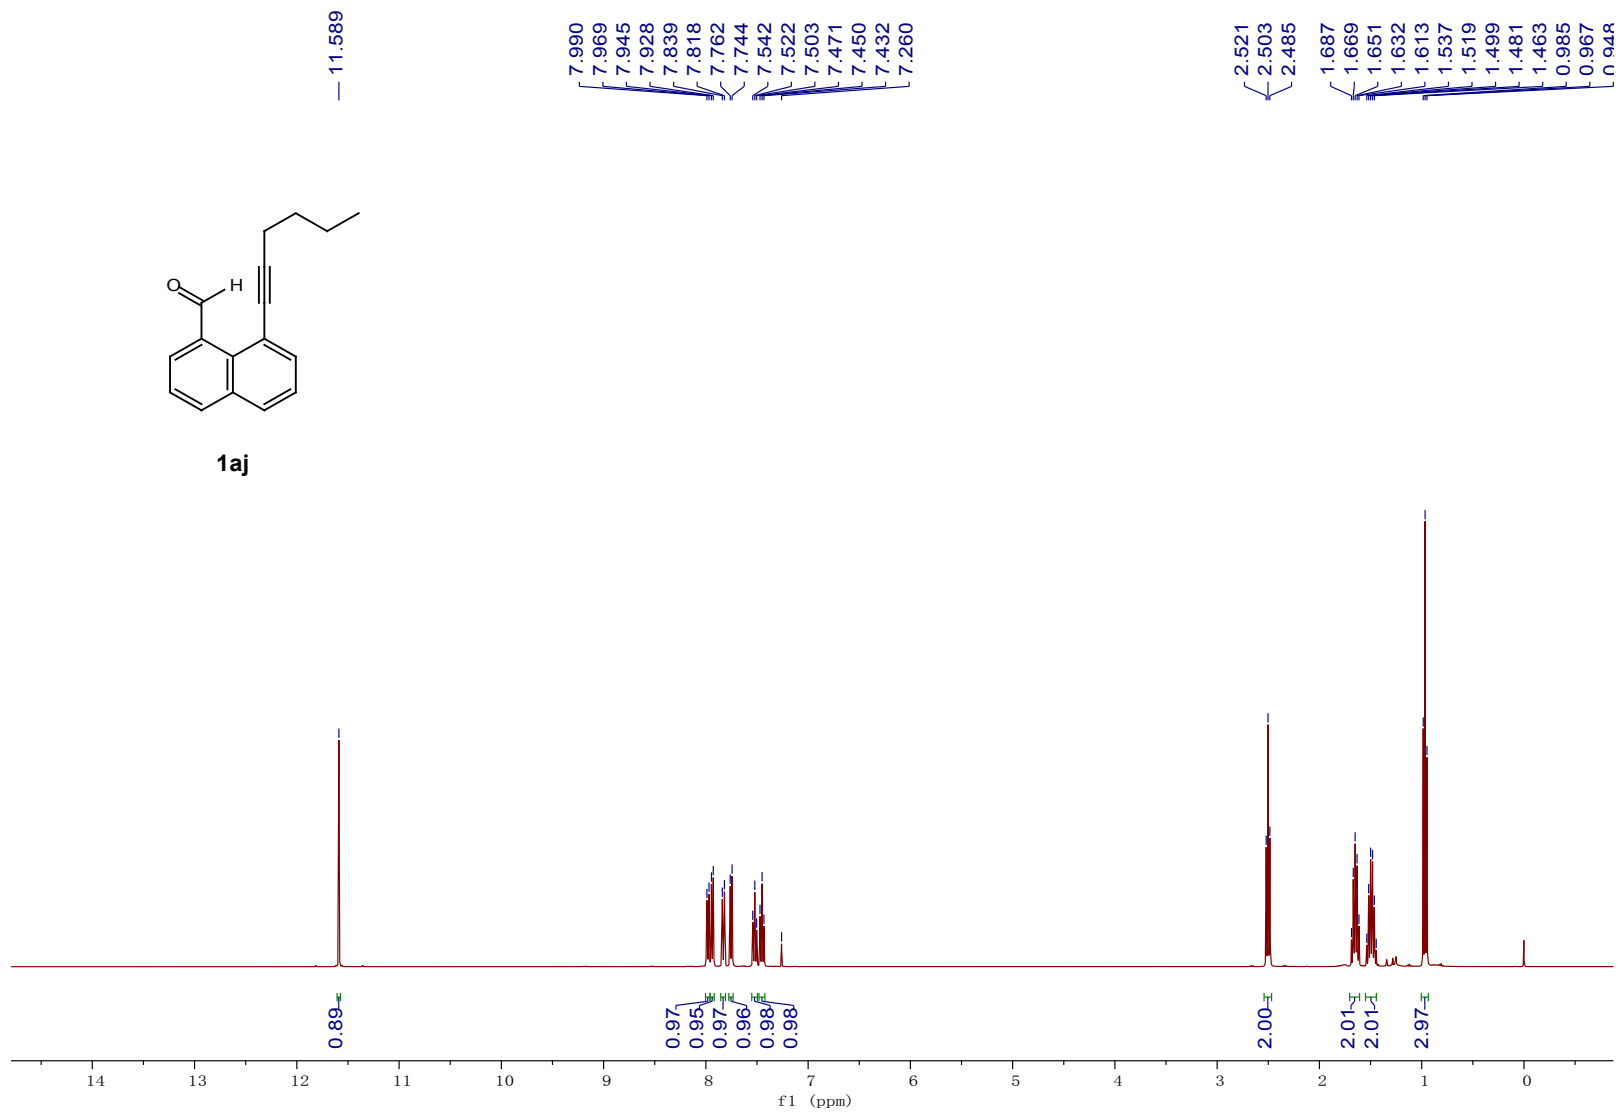

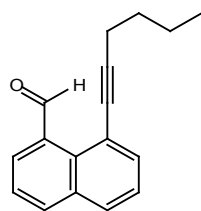

1aj

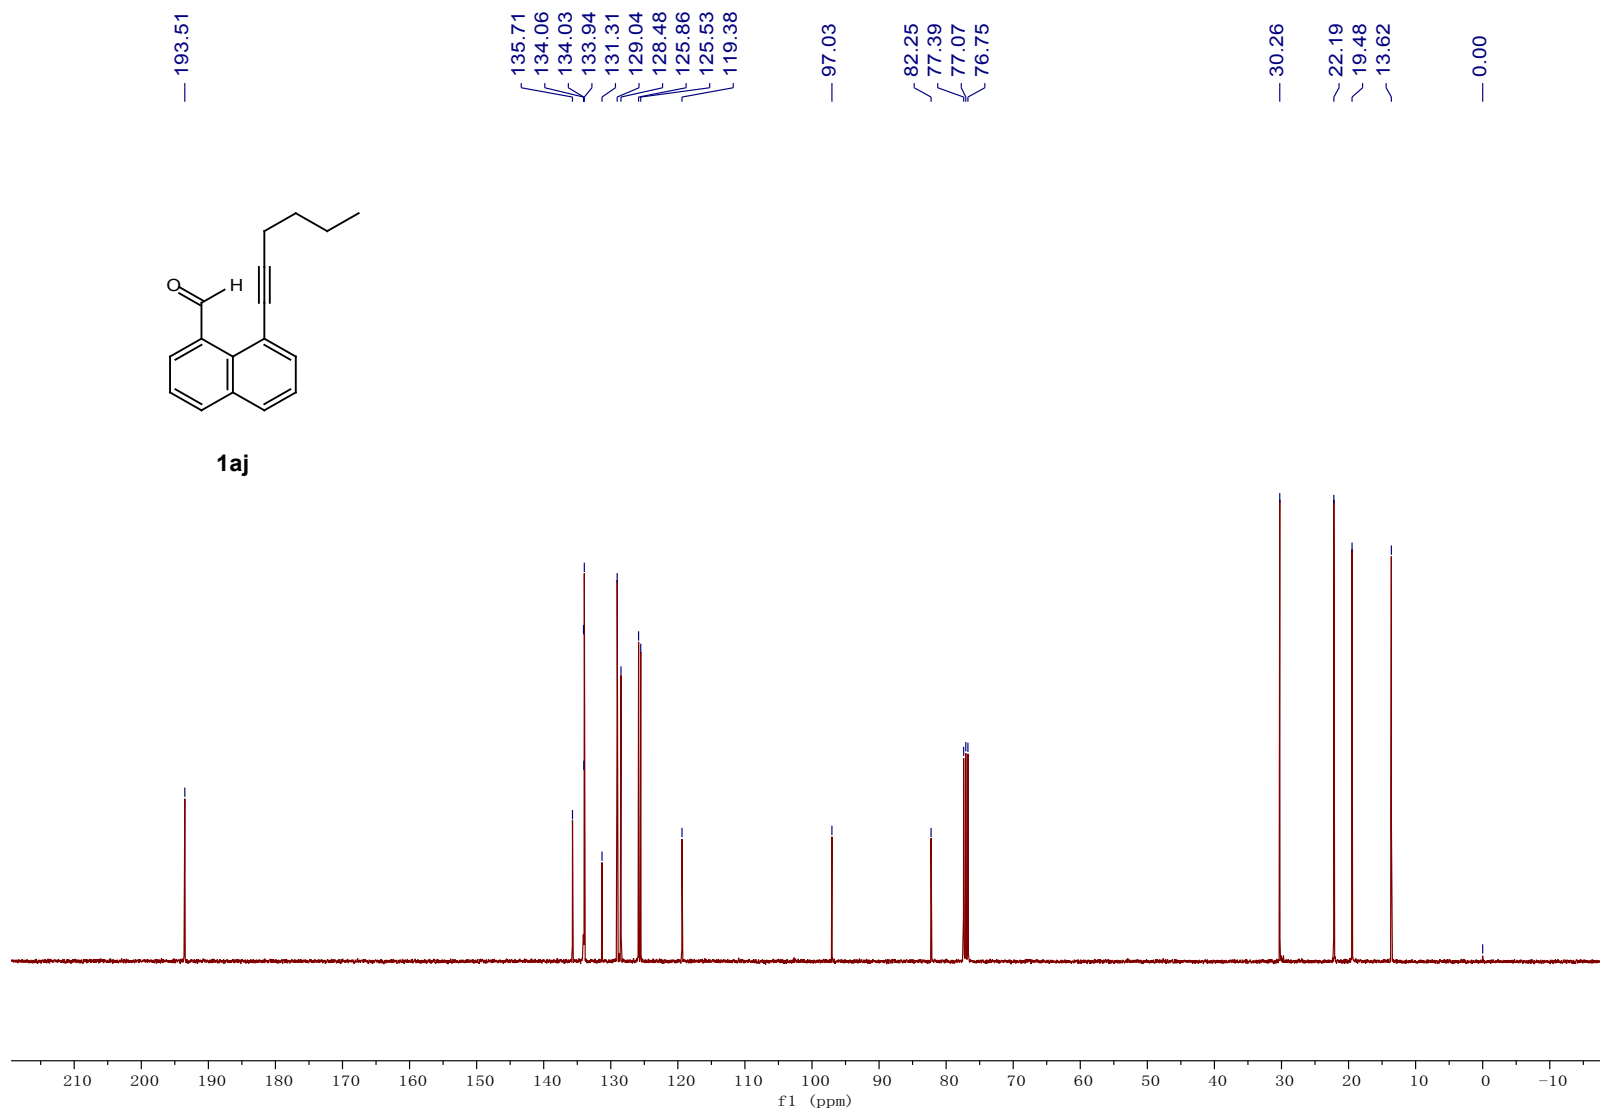

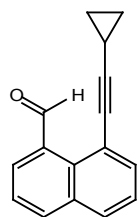

1ak

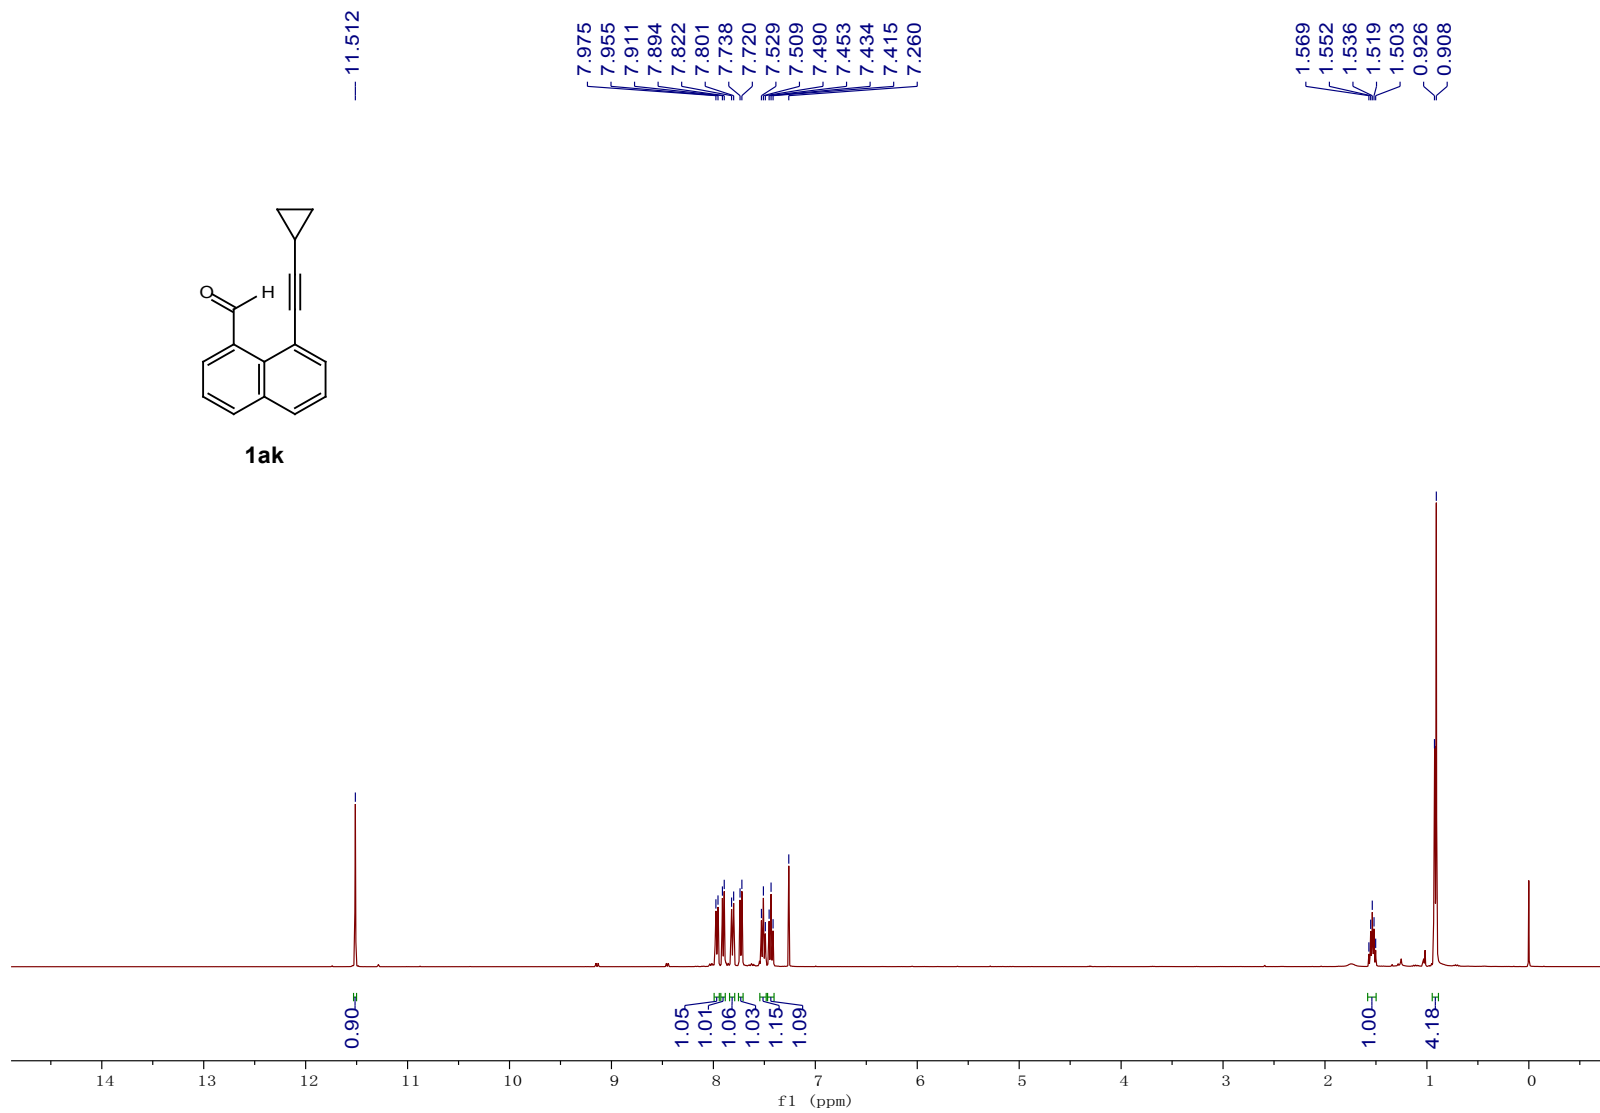



**1ak**

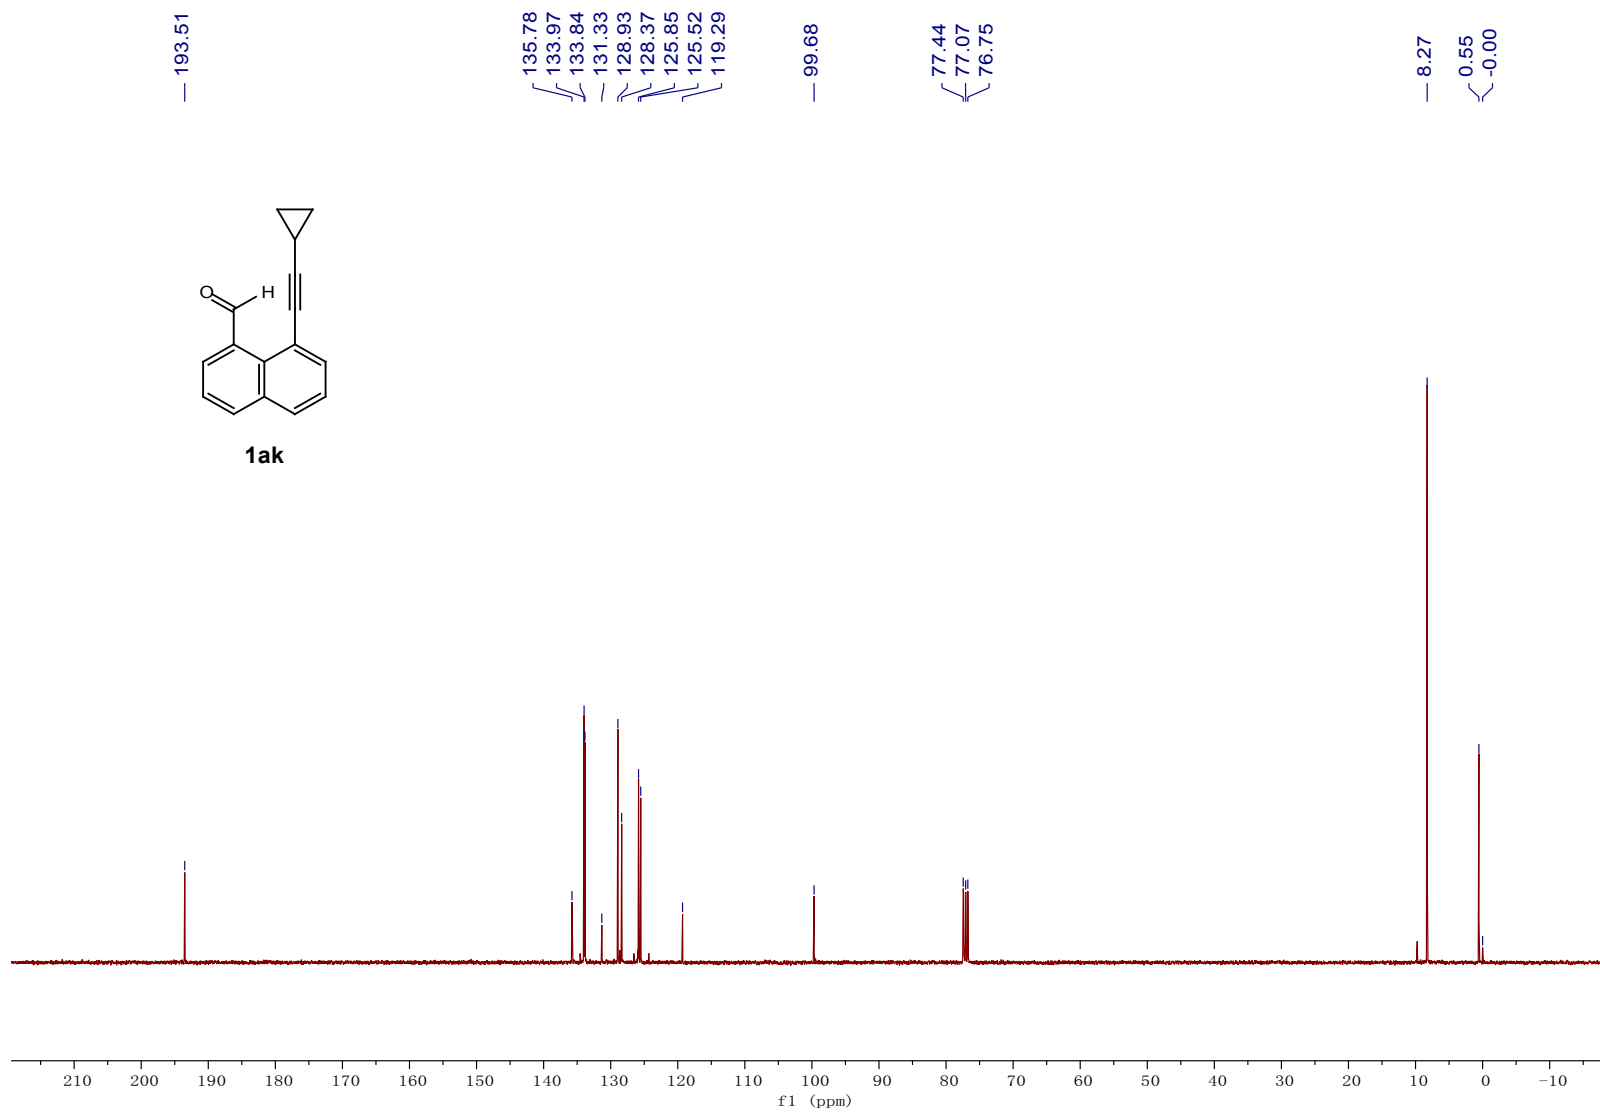

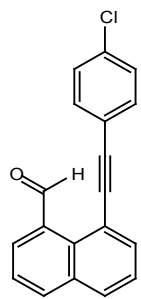

**1aI**

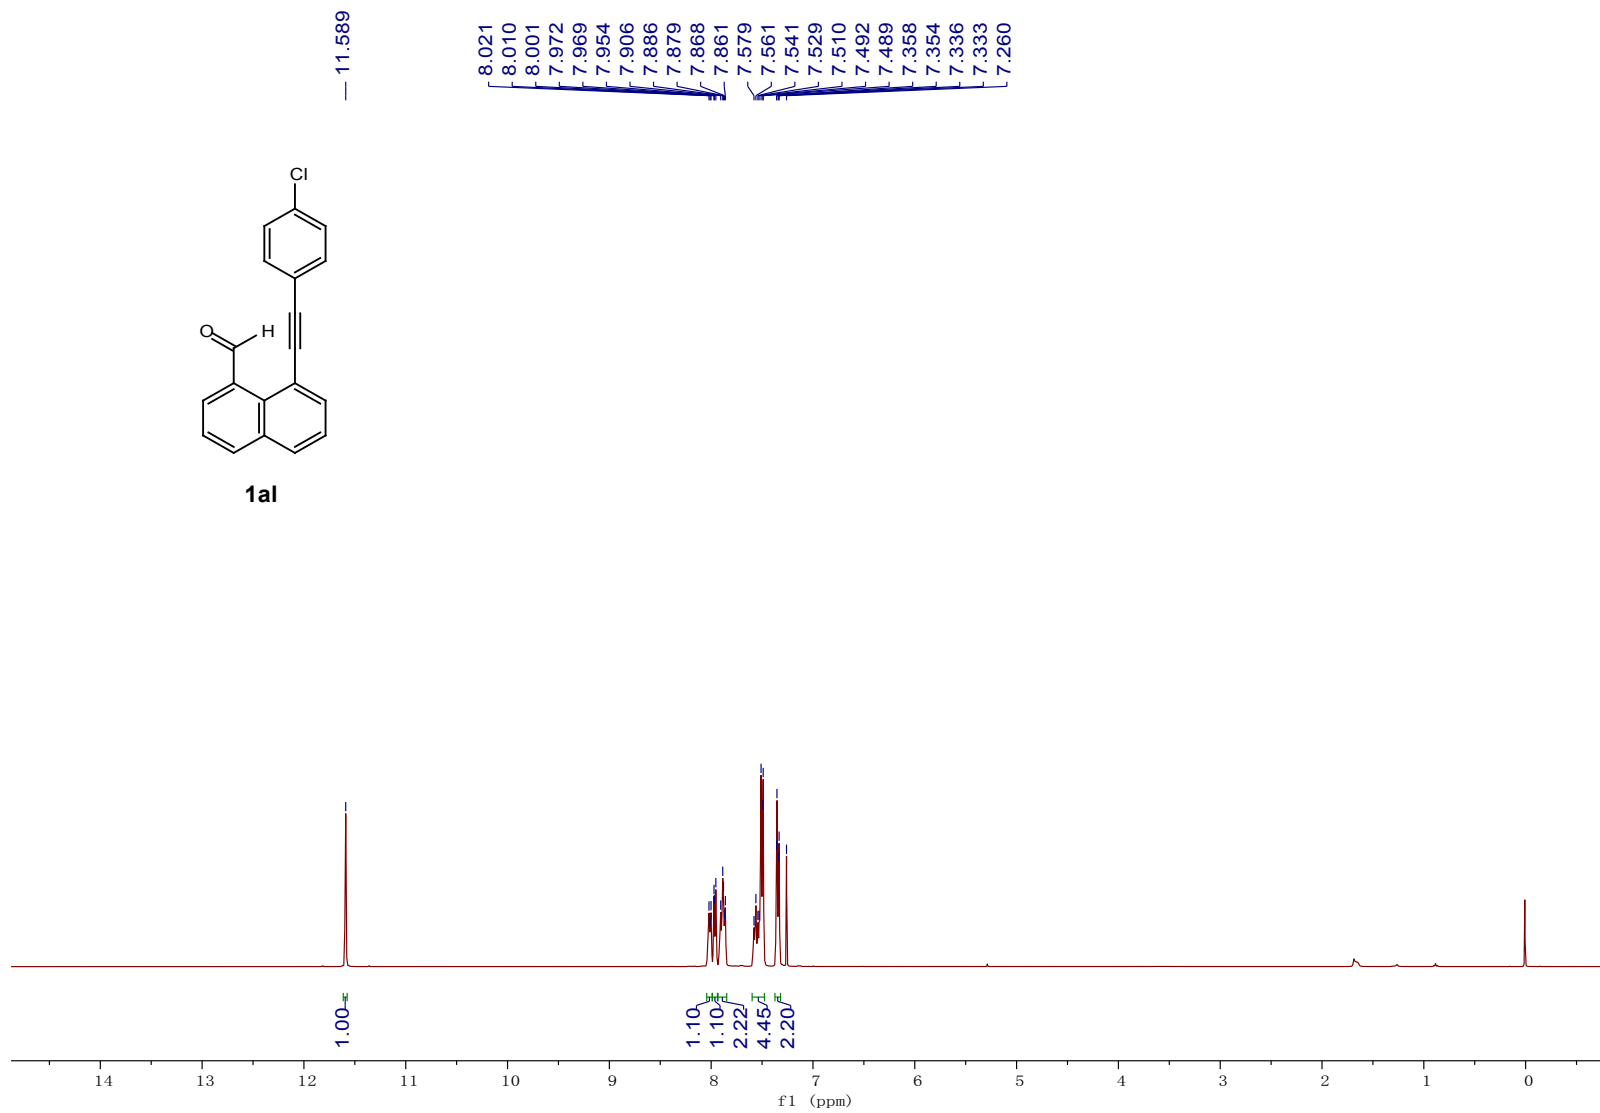



**1al**

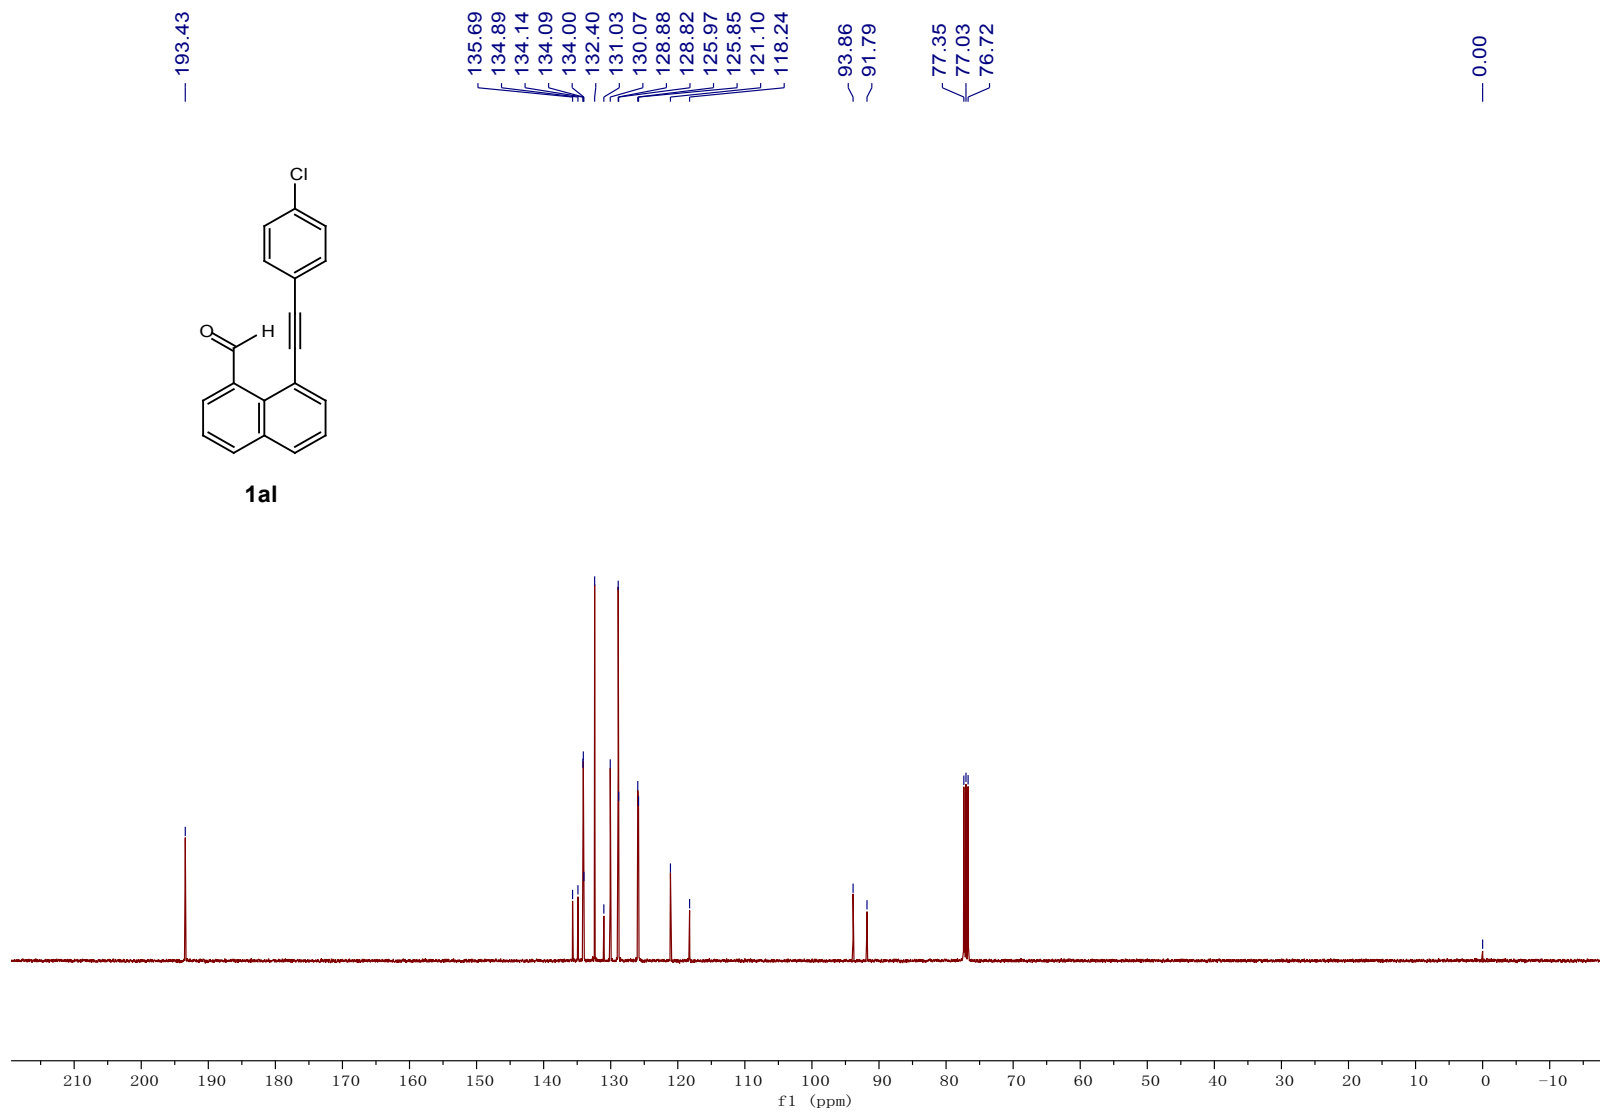

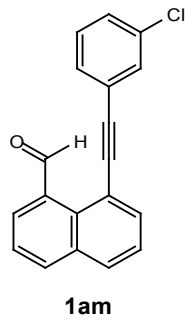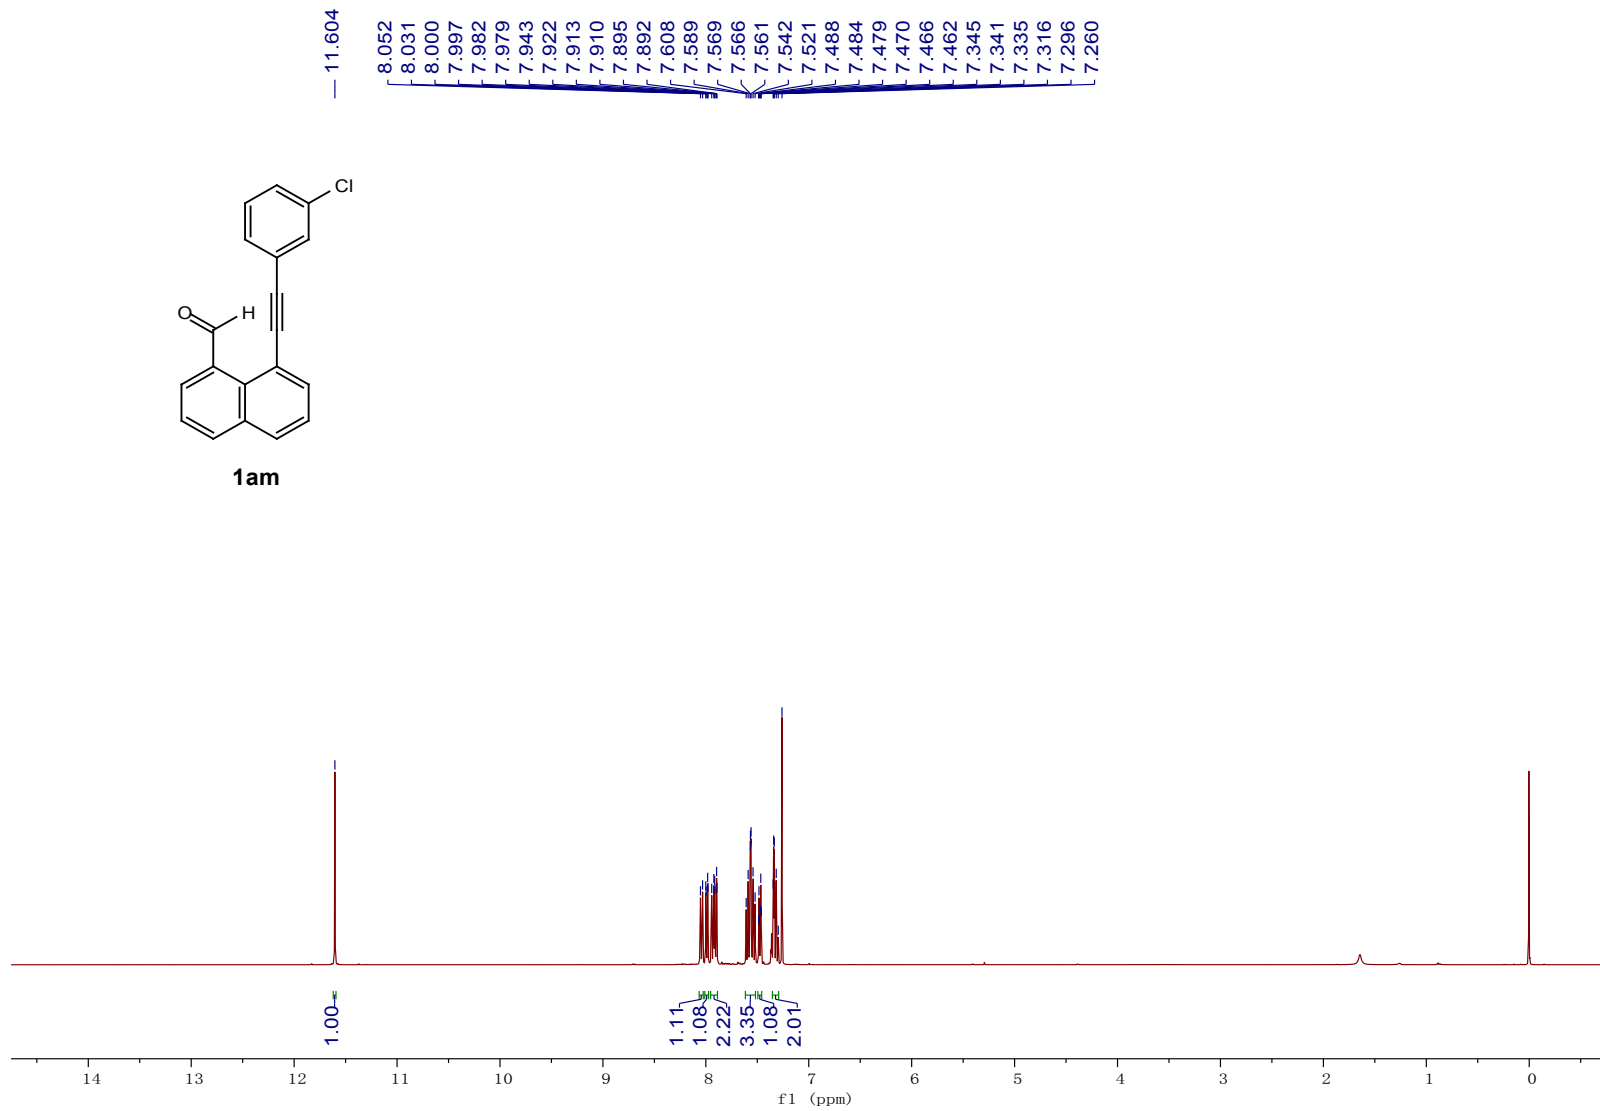



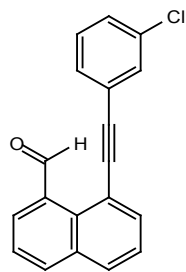

**1am**

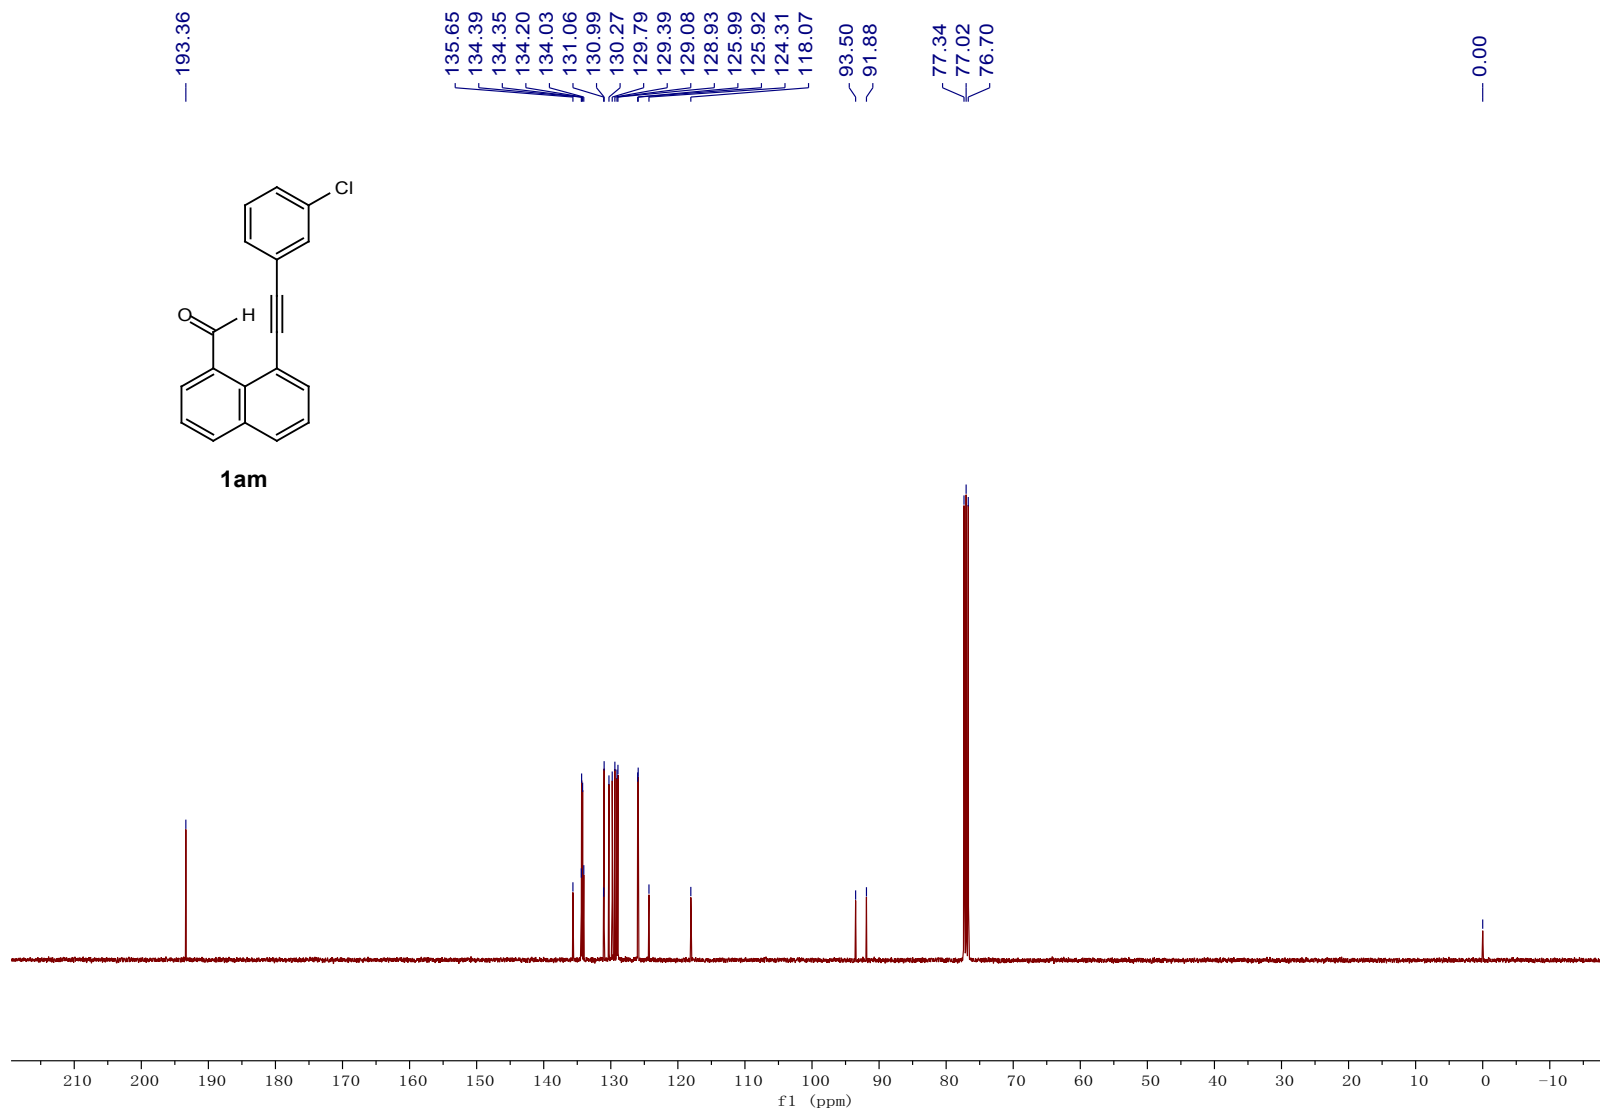

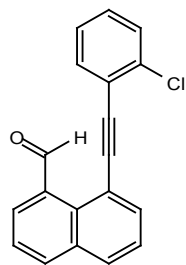

1an

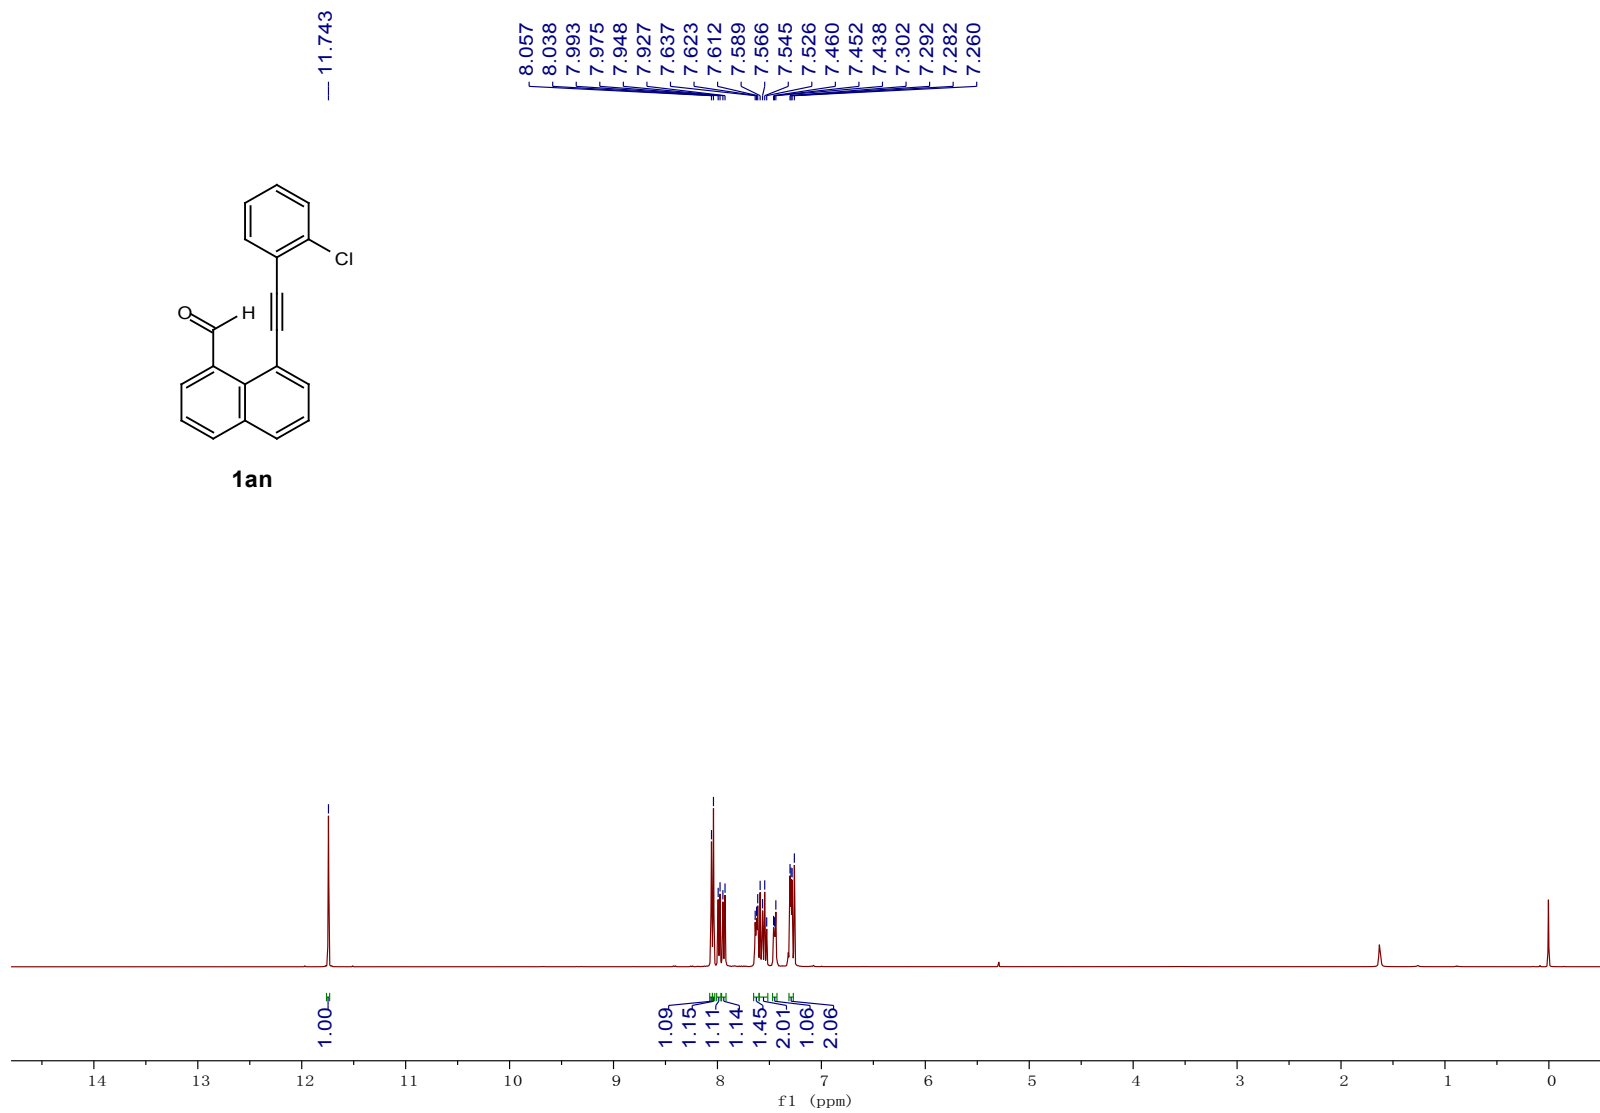



**1an**

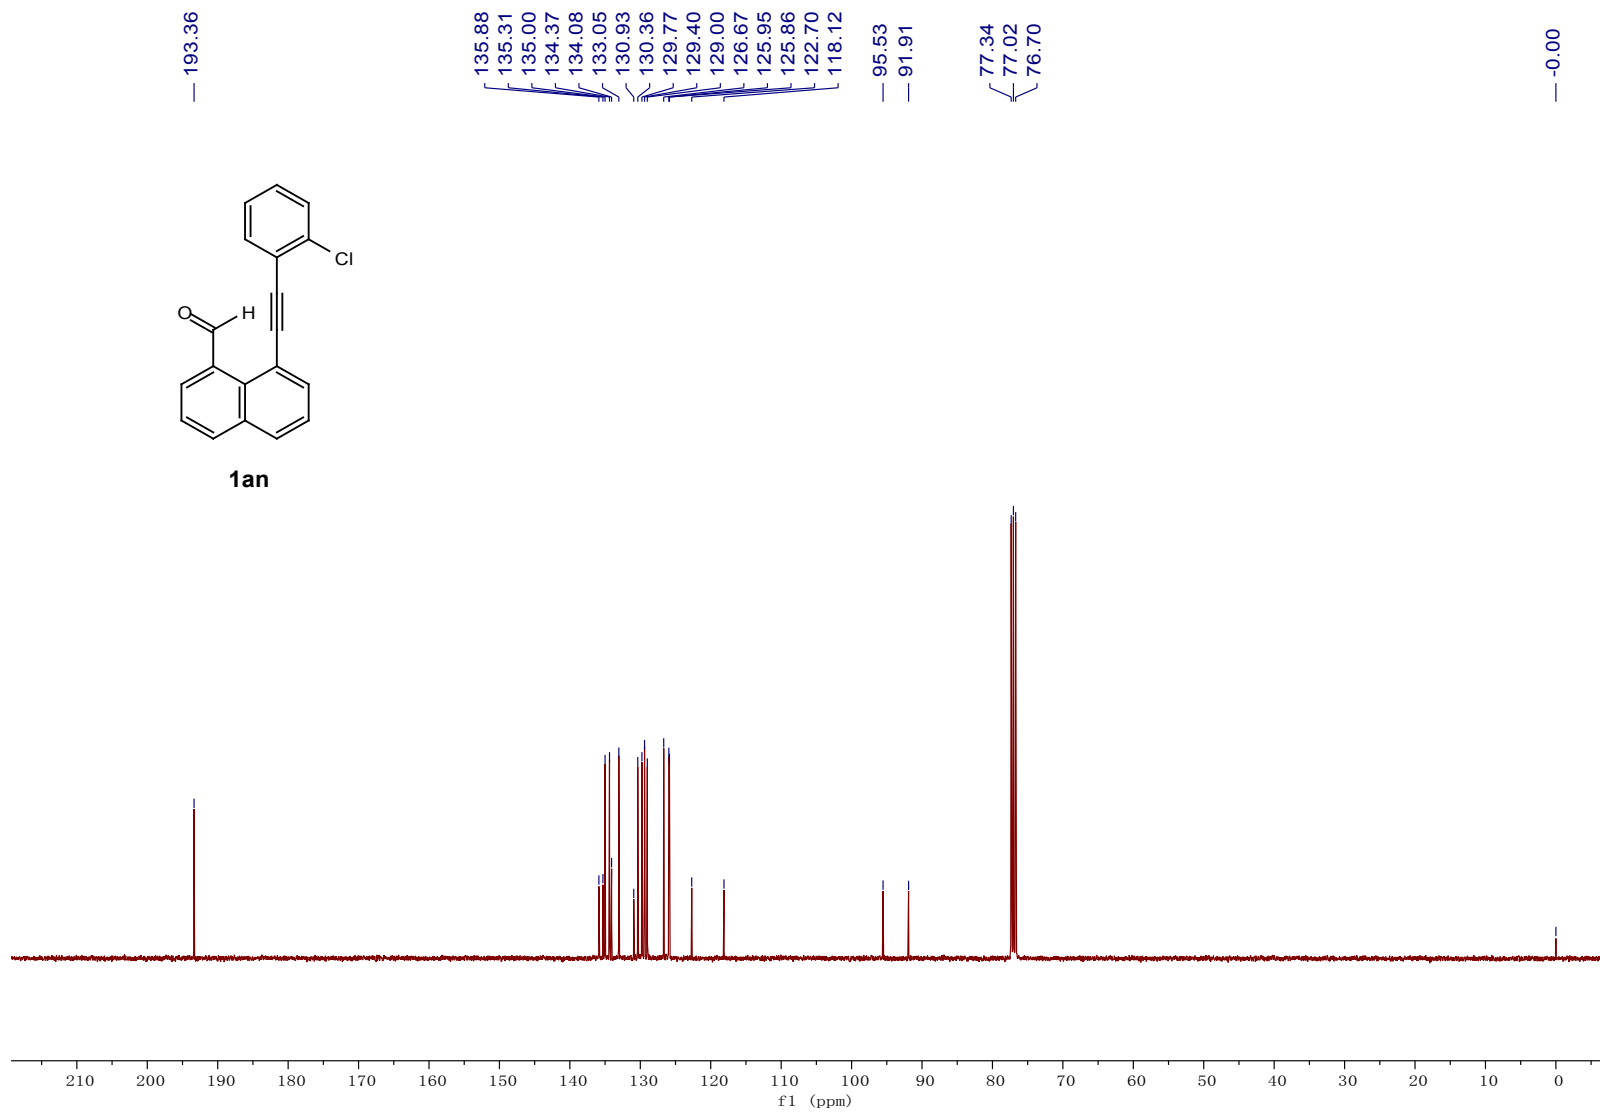

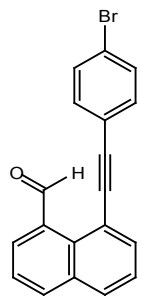

**1ao**

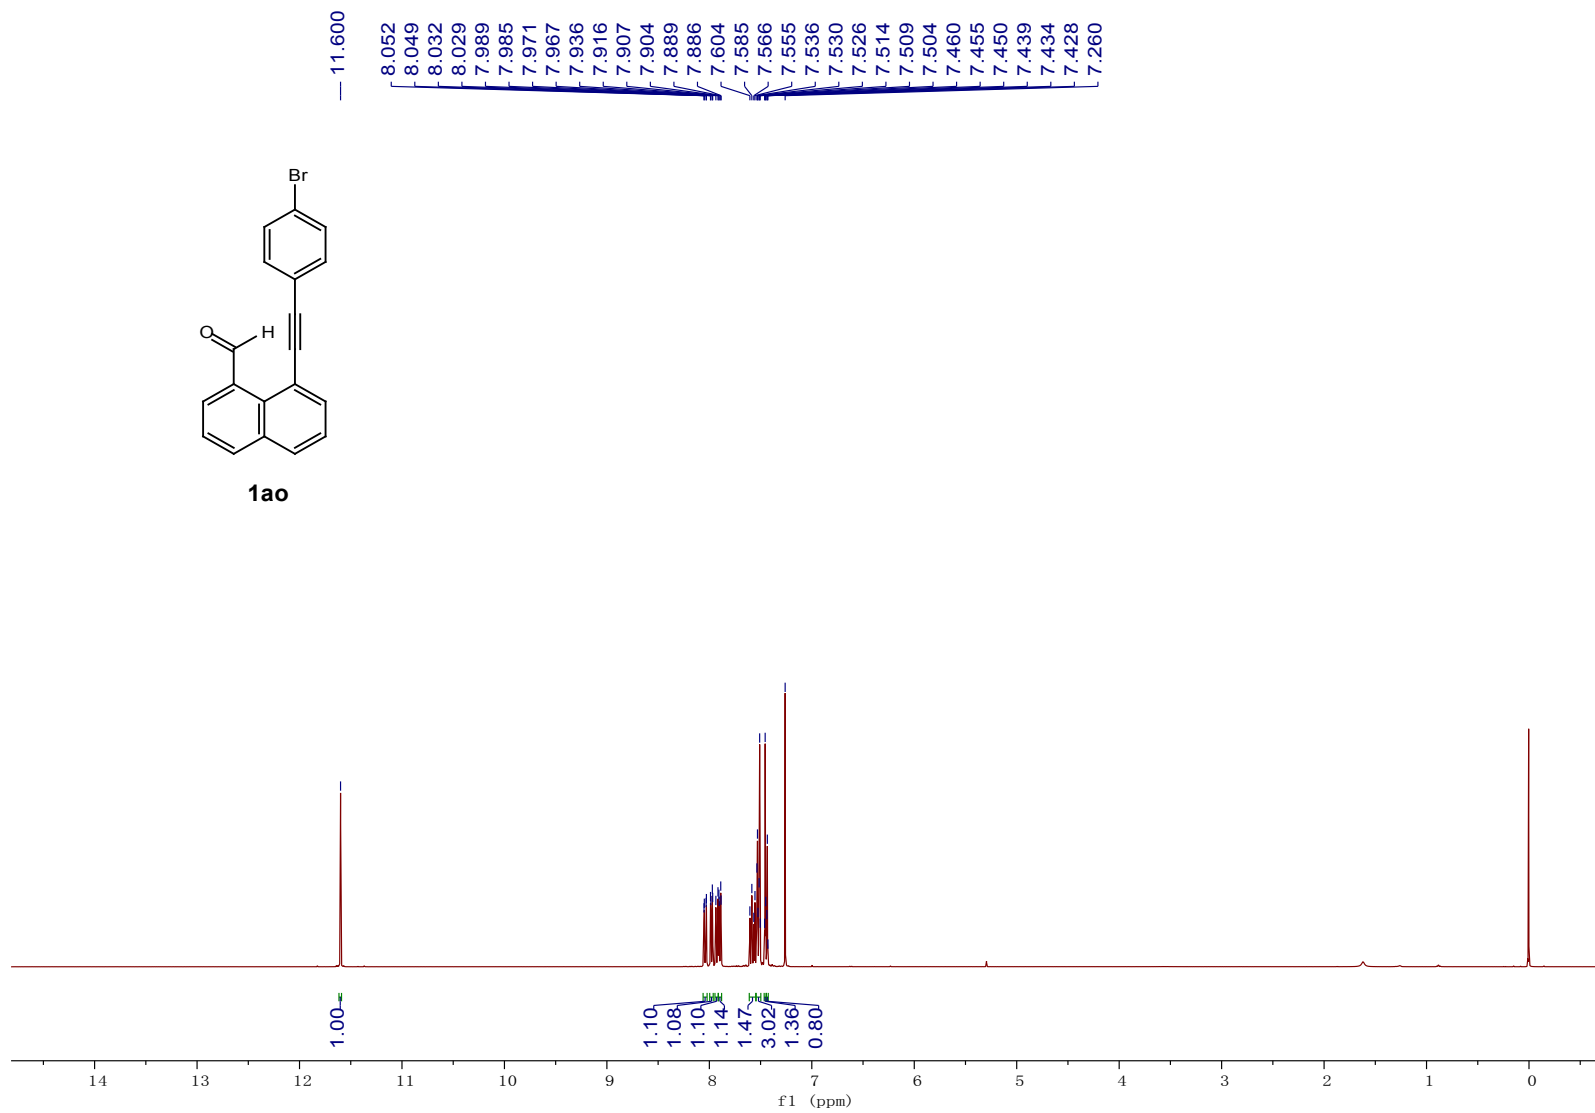

— 193.47



**1ao**

135.71  
134.17  
134.11  
134.03  
132.60  
131.83  
131.05  
130.12  
128.86  
126.00  
125.90  
123.18  
121.55  
118.26

93.94  
91.94

77.33  
77.02  
76.70

— 0.00

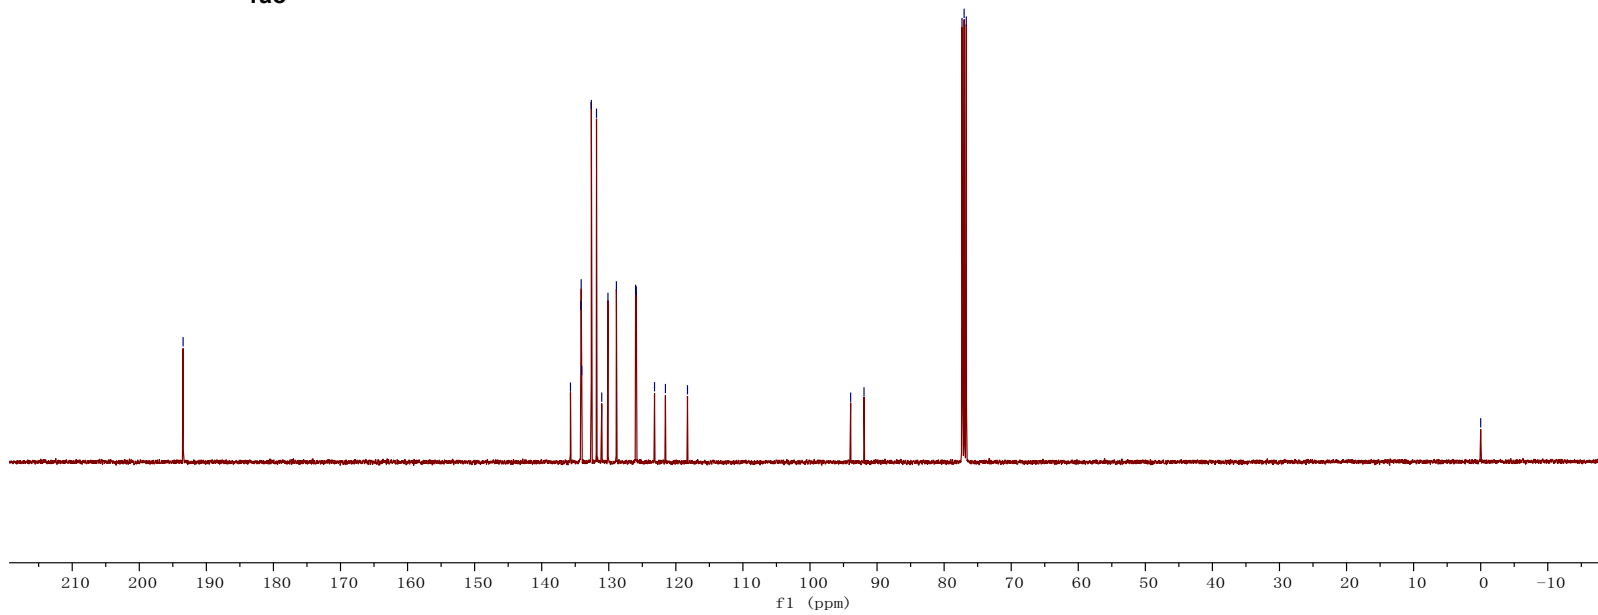

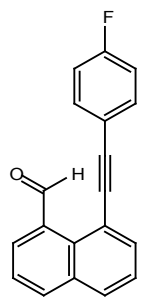

1ap

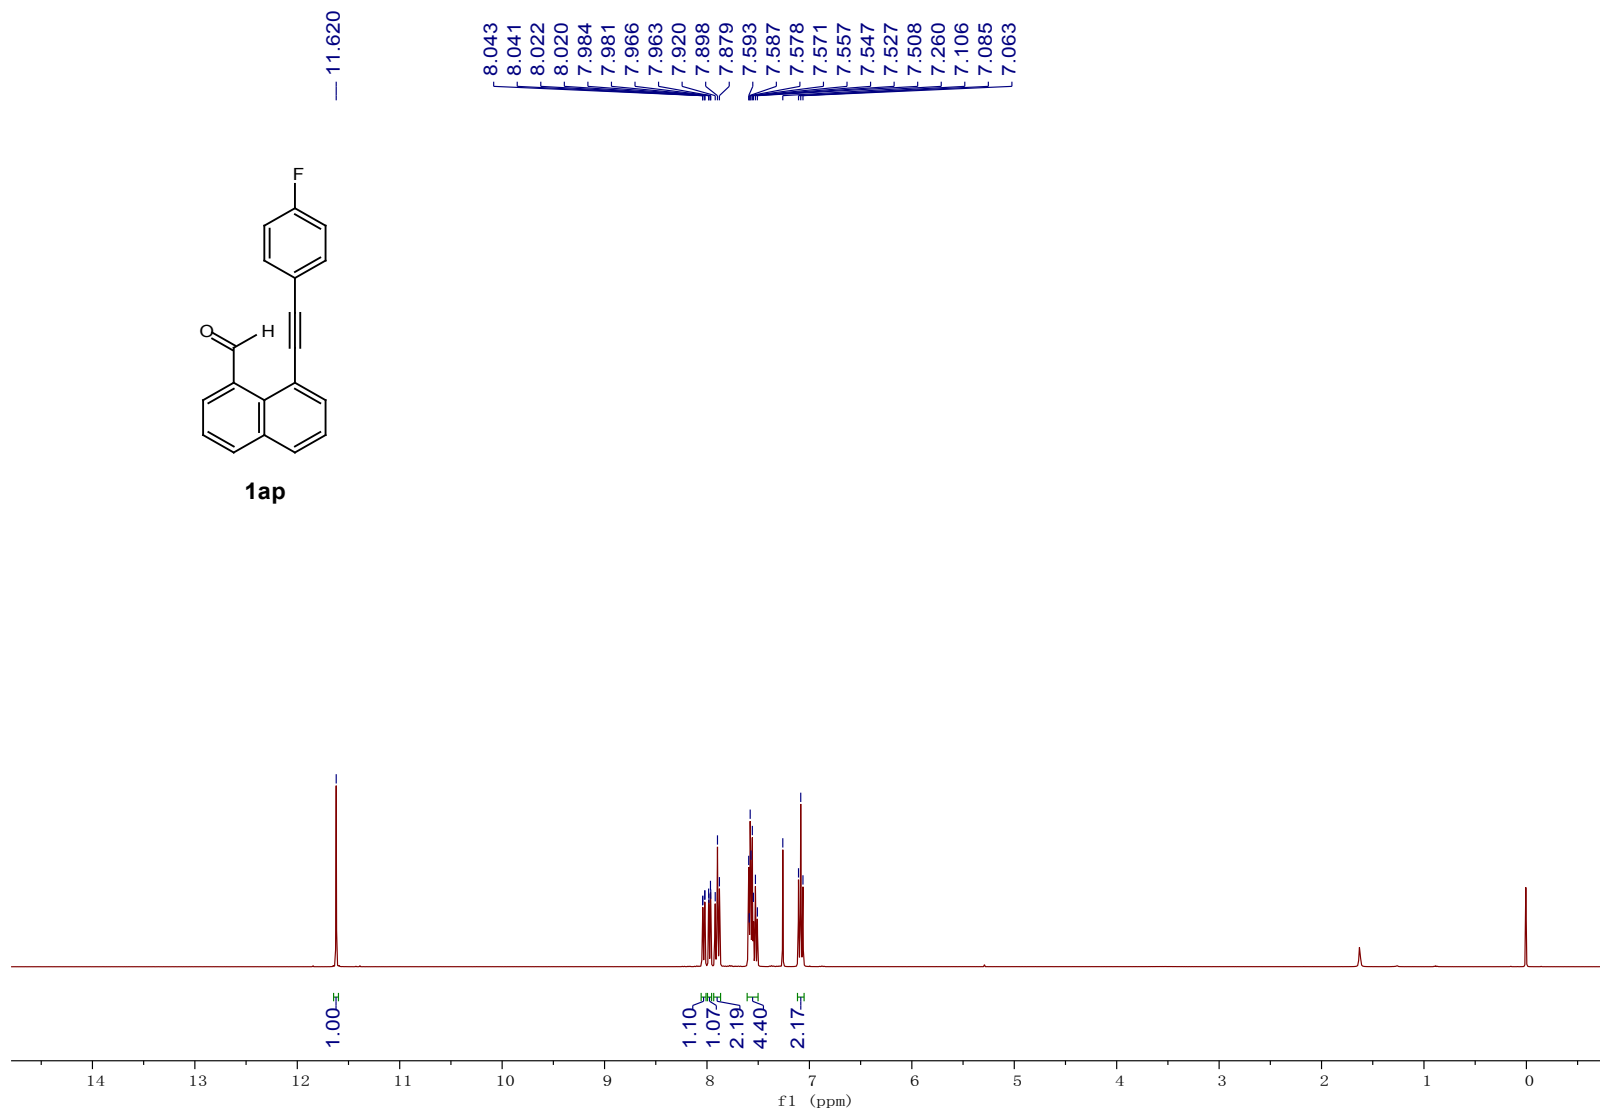

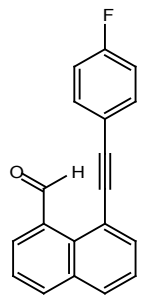

1ap

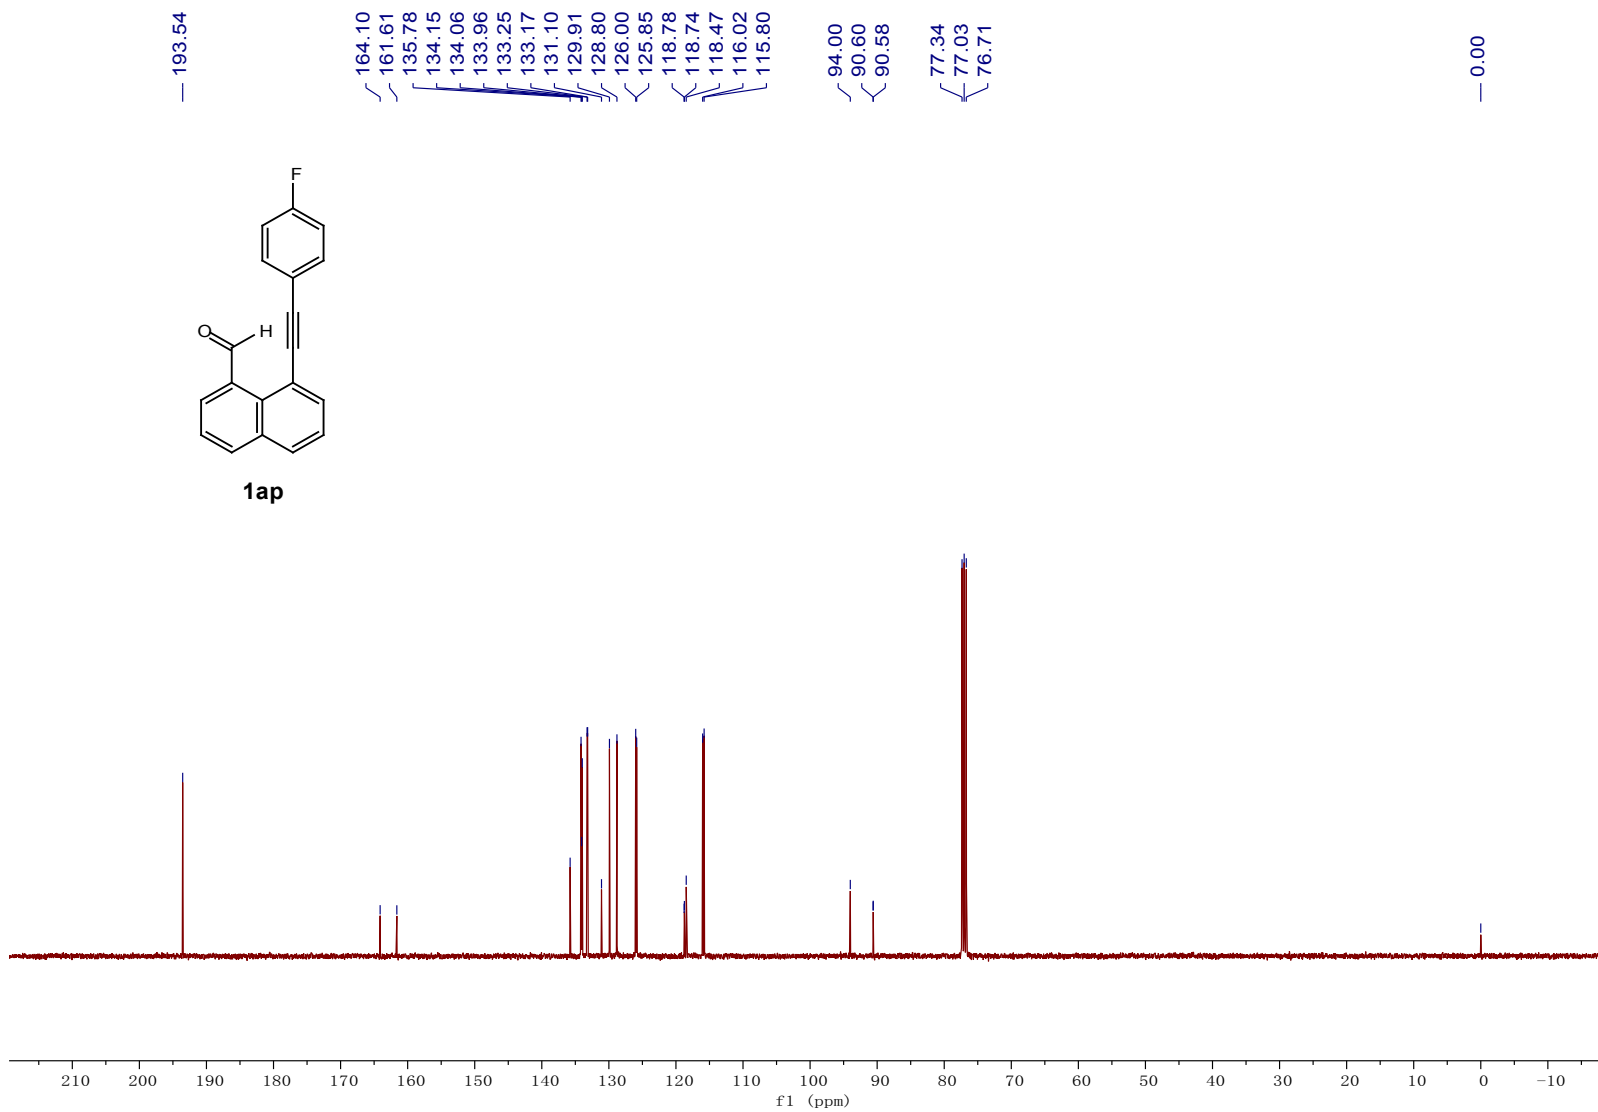

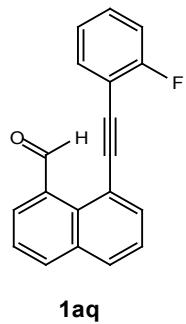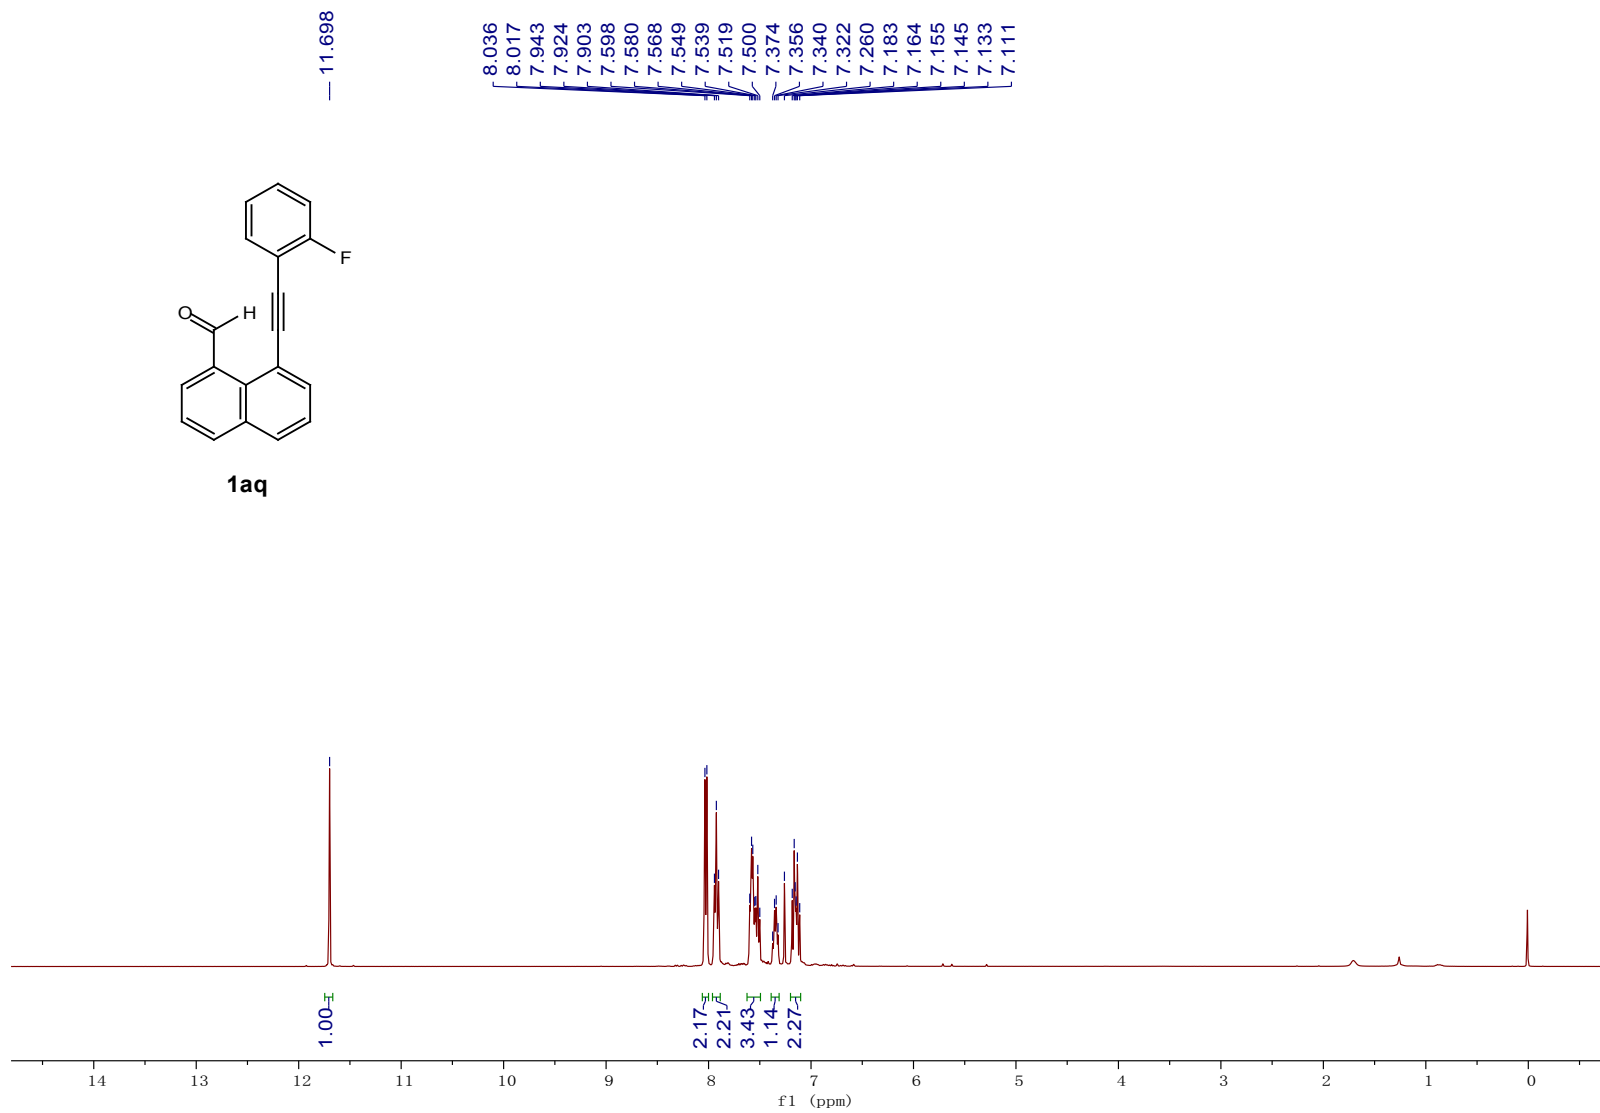



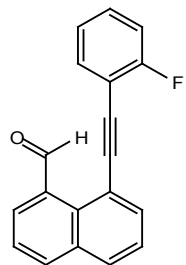

1aq

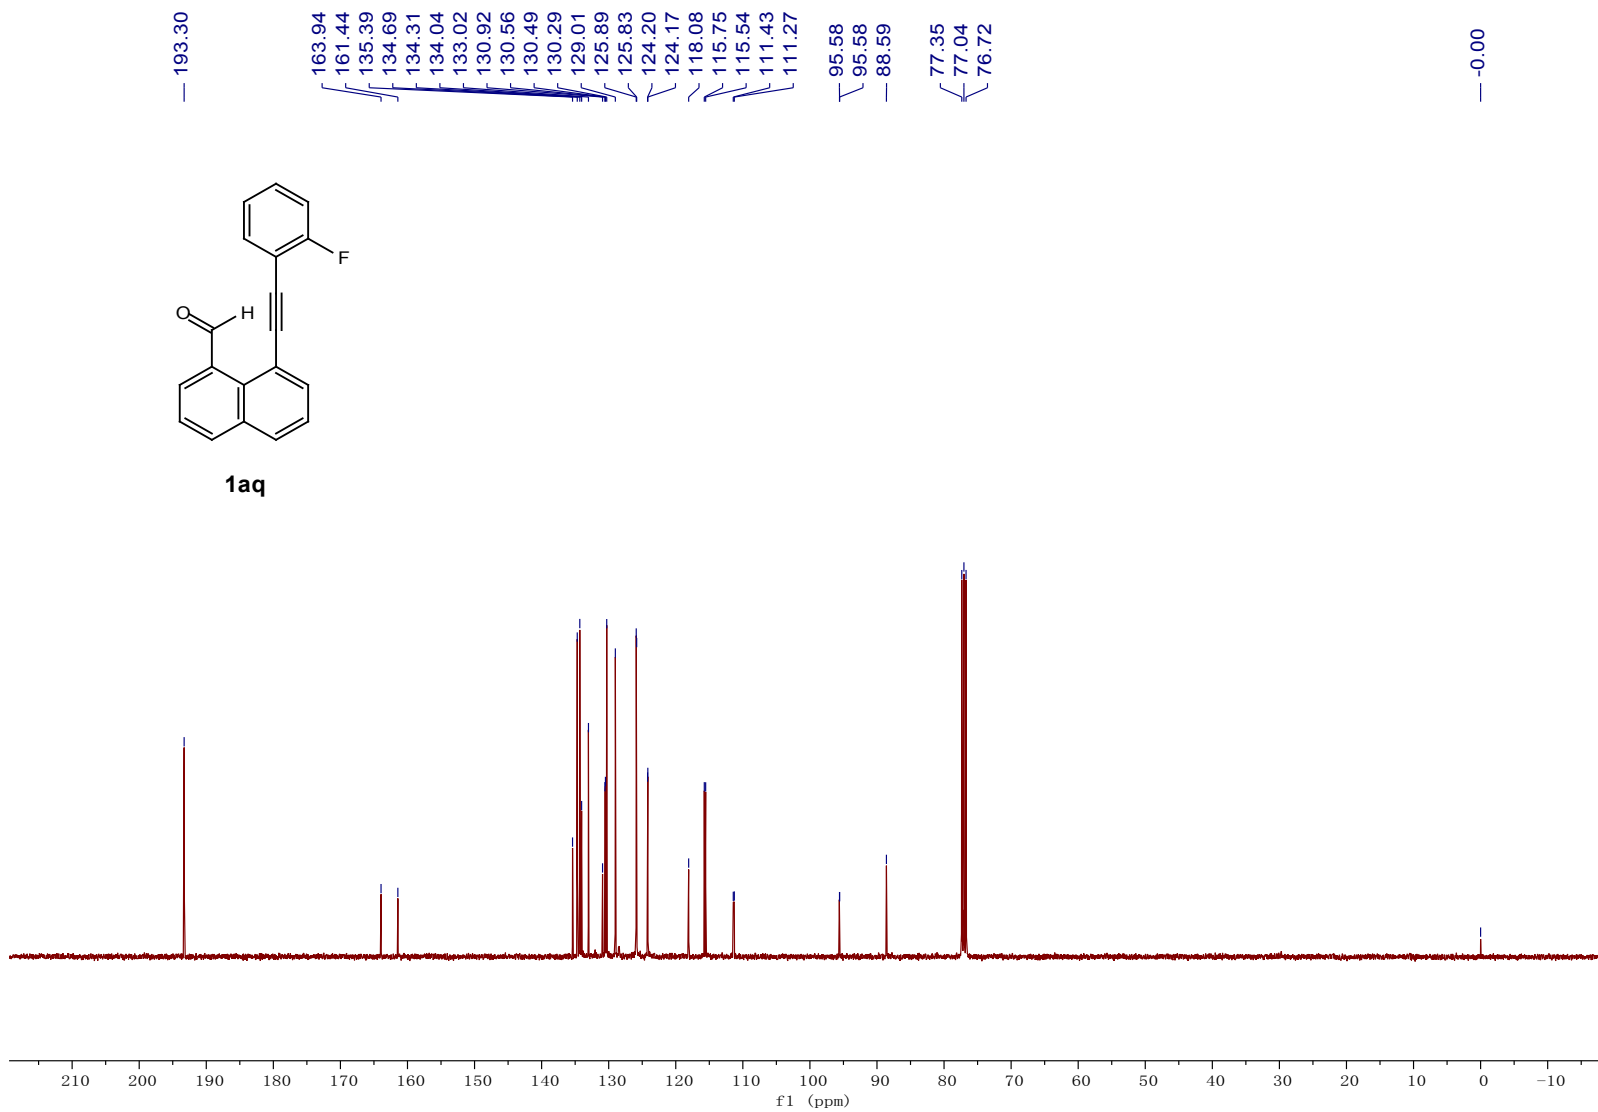

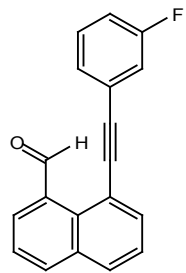

1ar

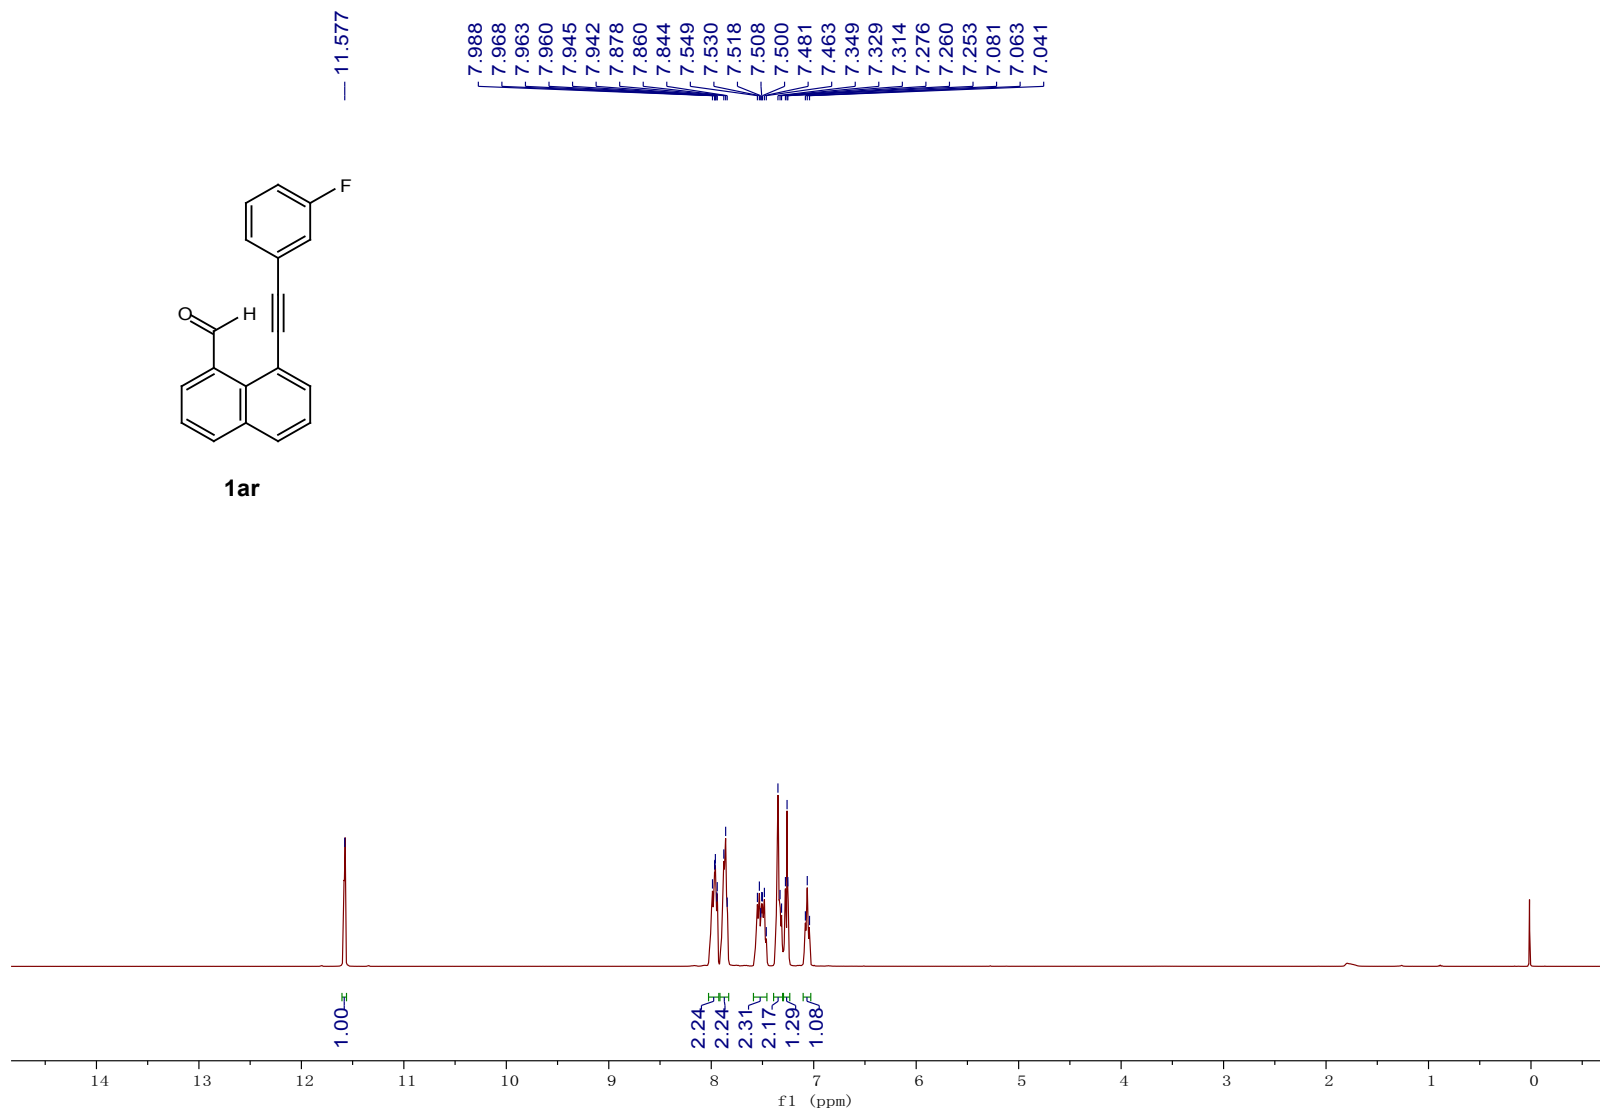

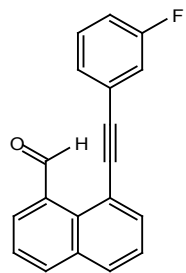

**1ar**

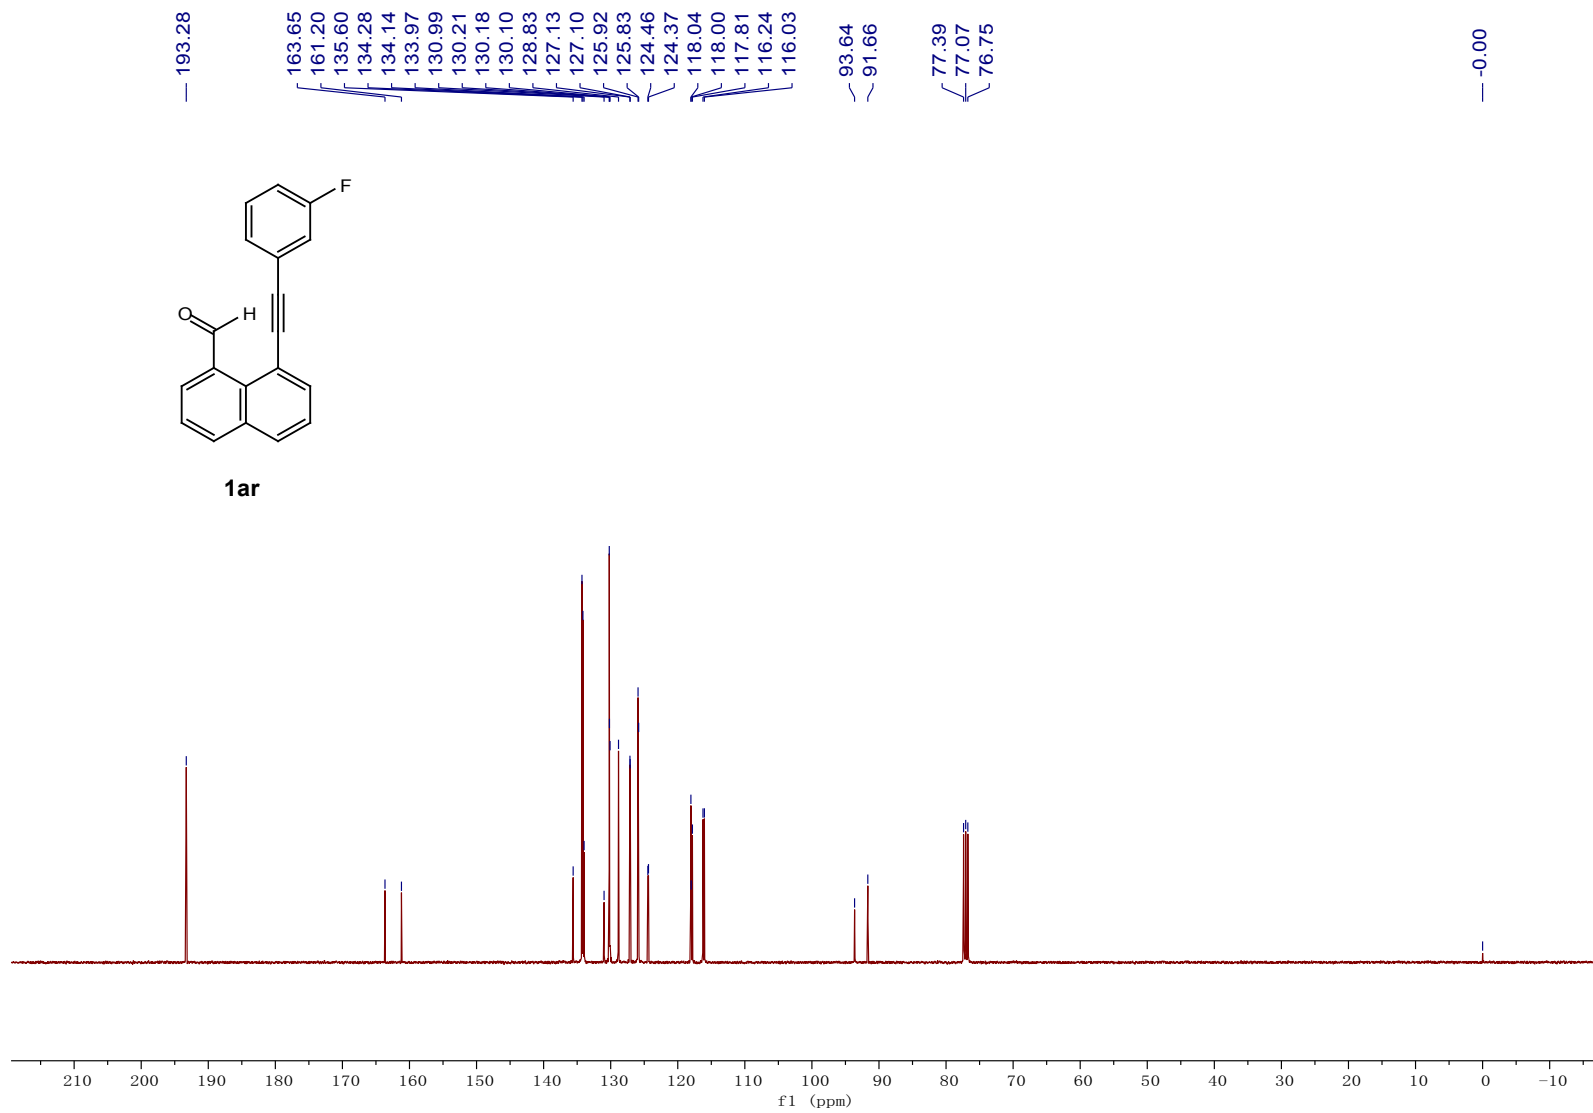

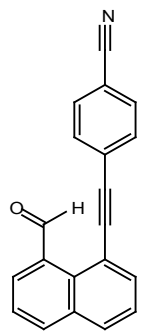

**1as**

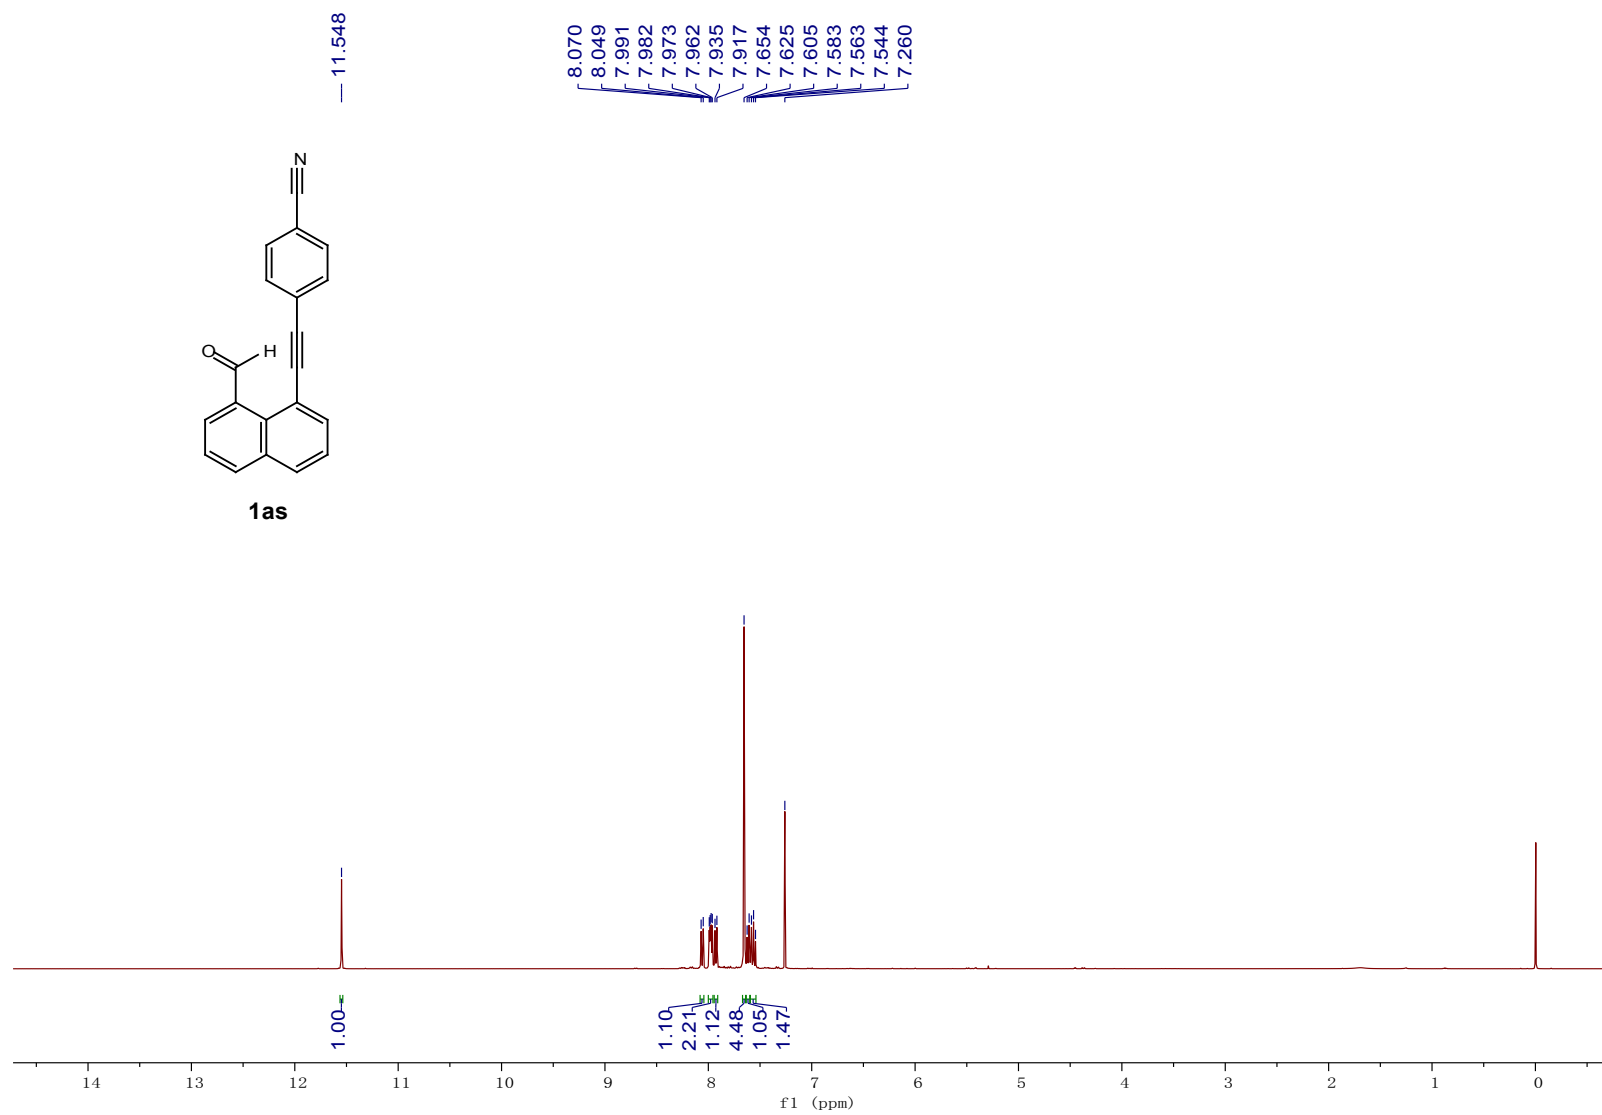



**1as**

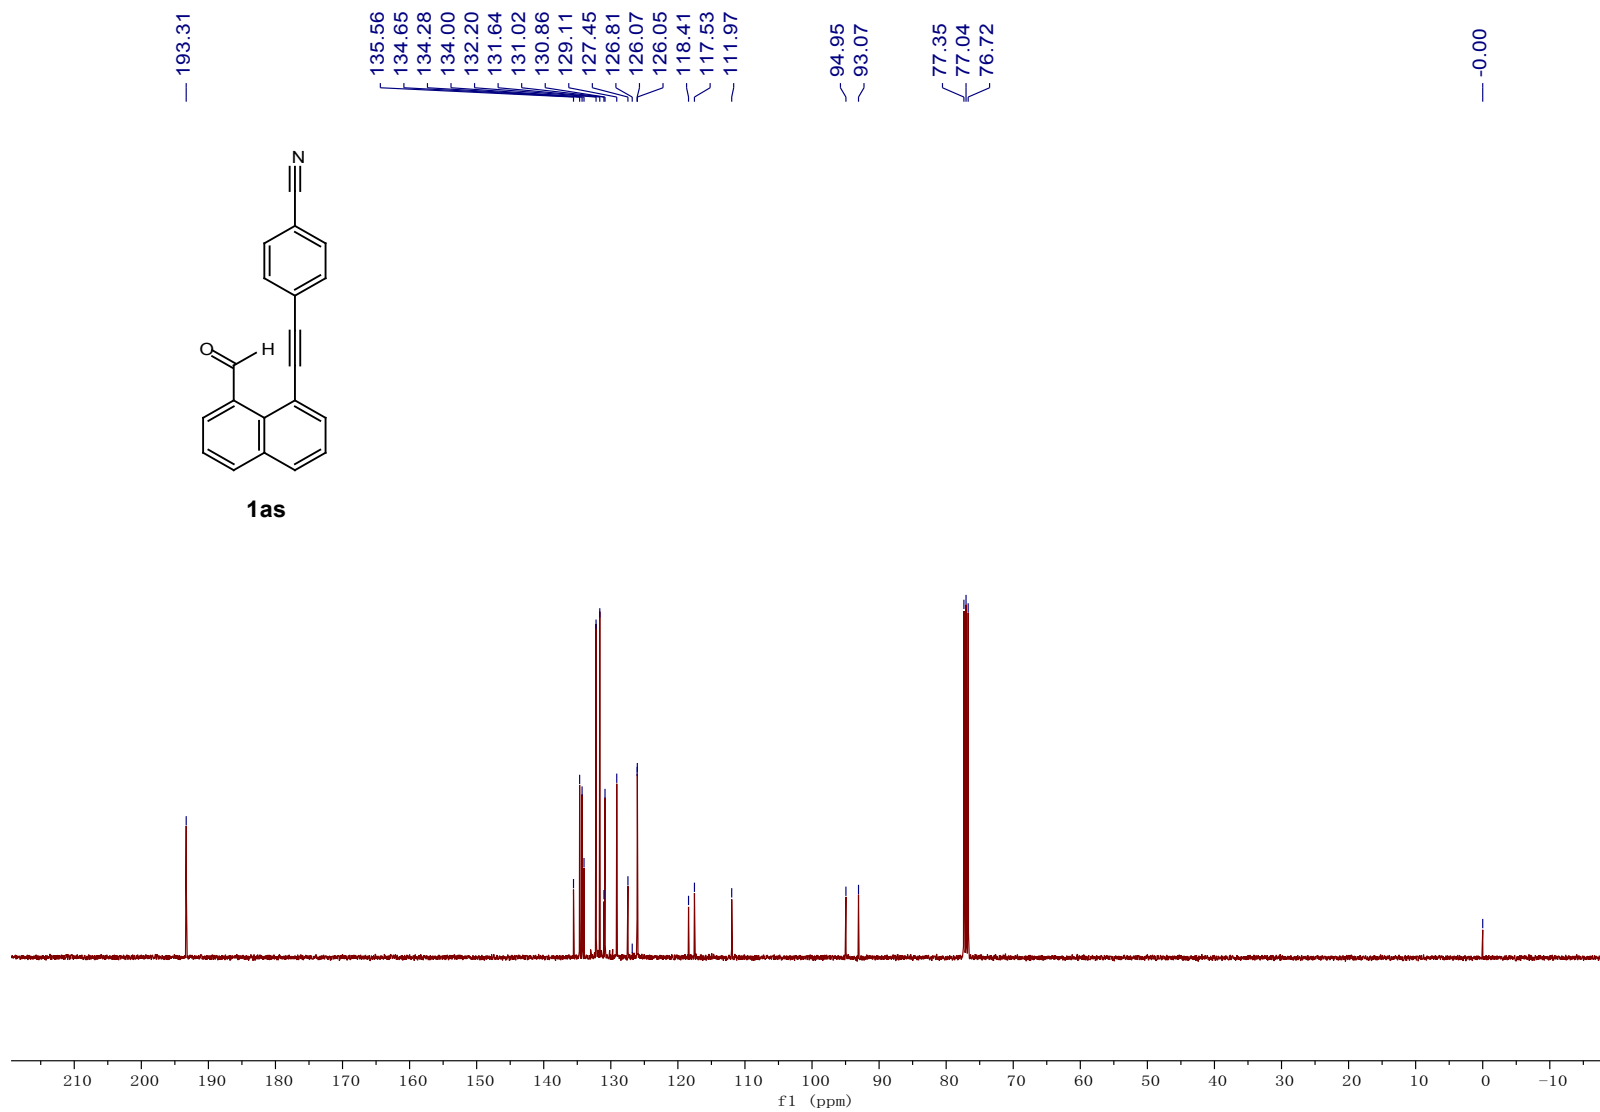

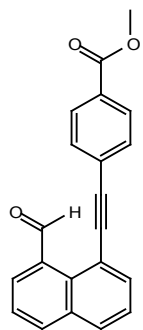

**1at**

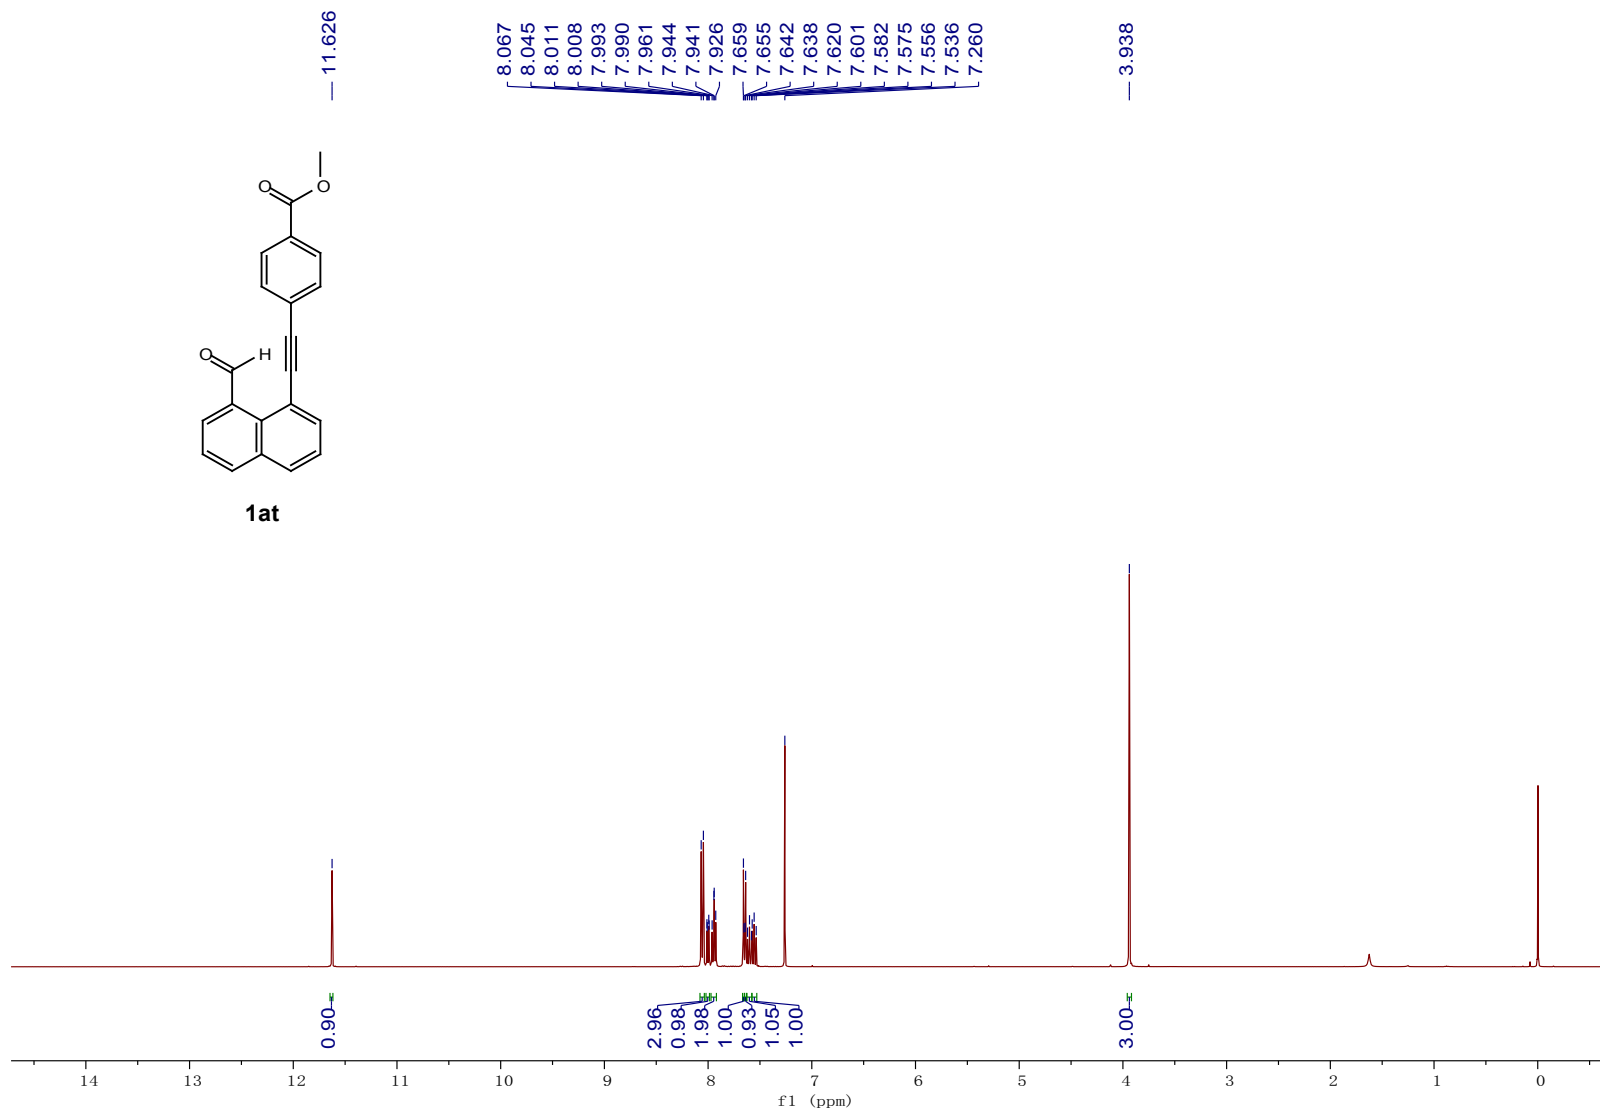

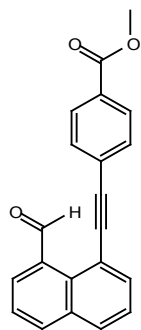

**1at**

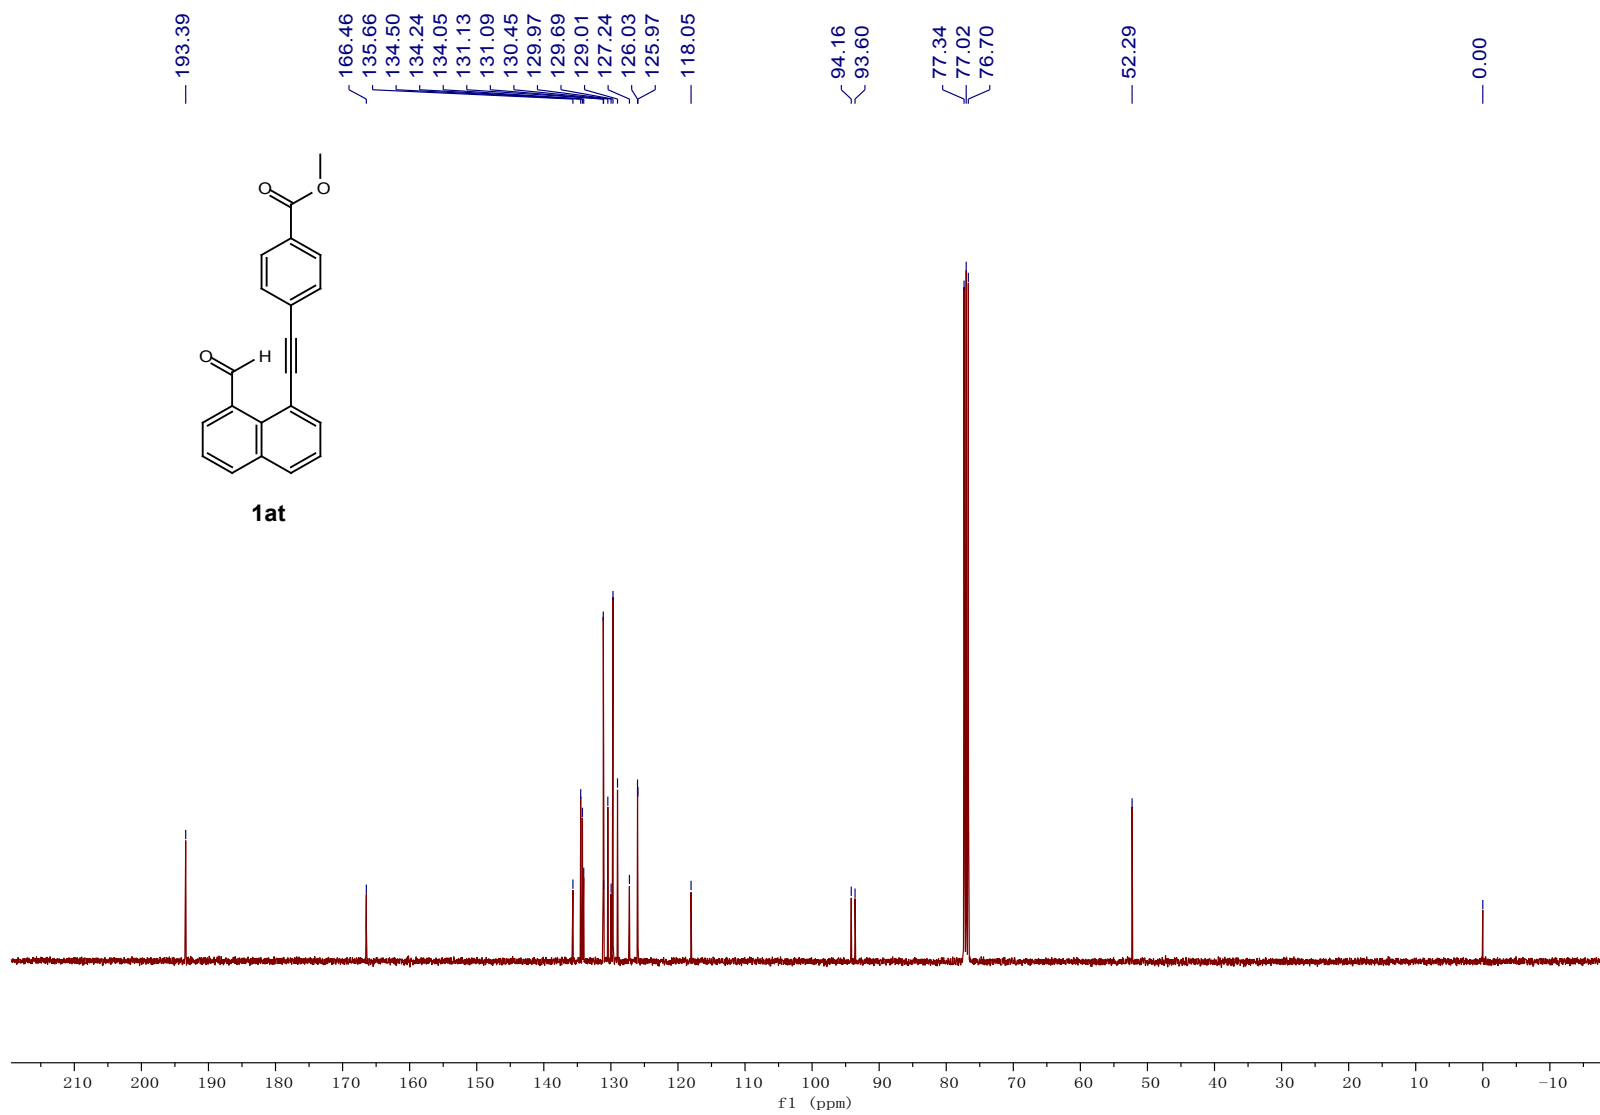

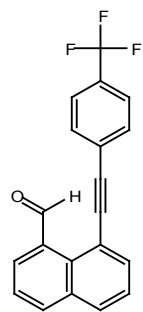

1au

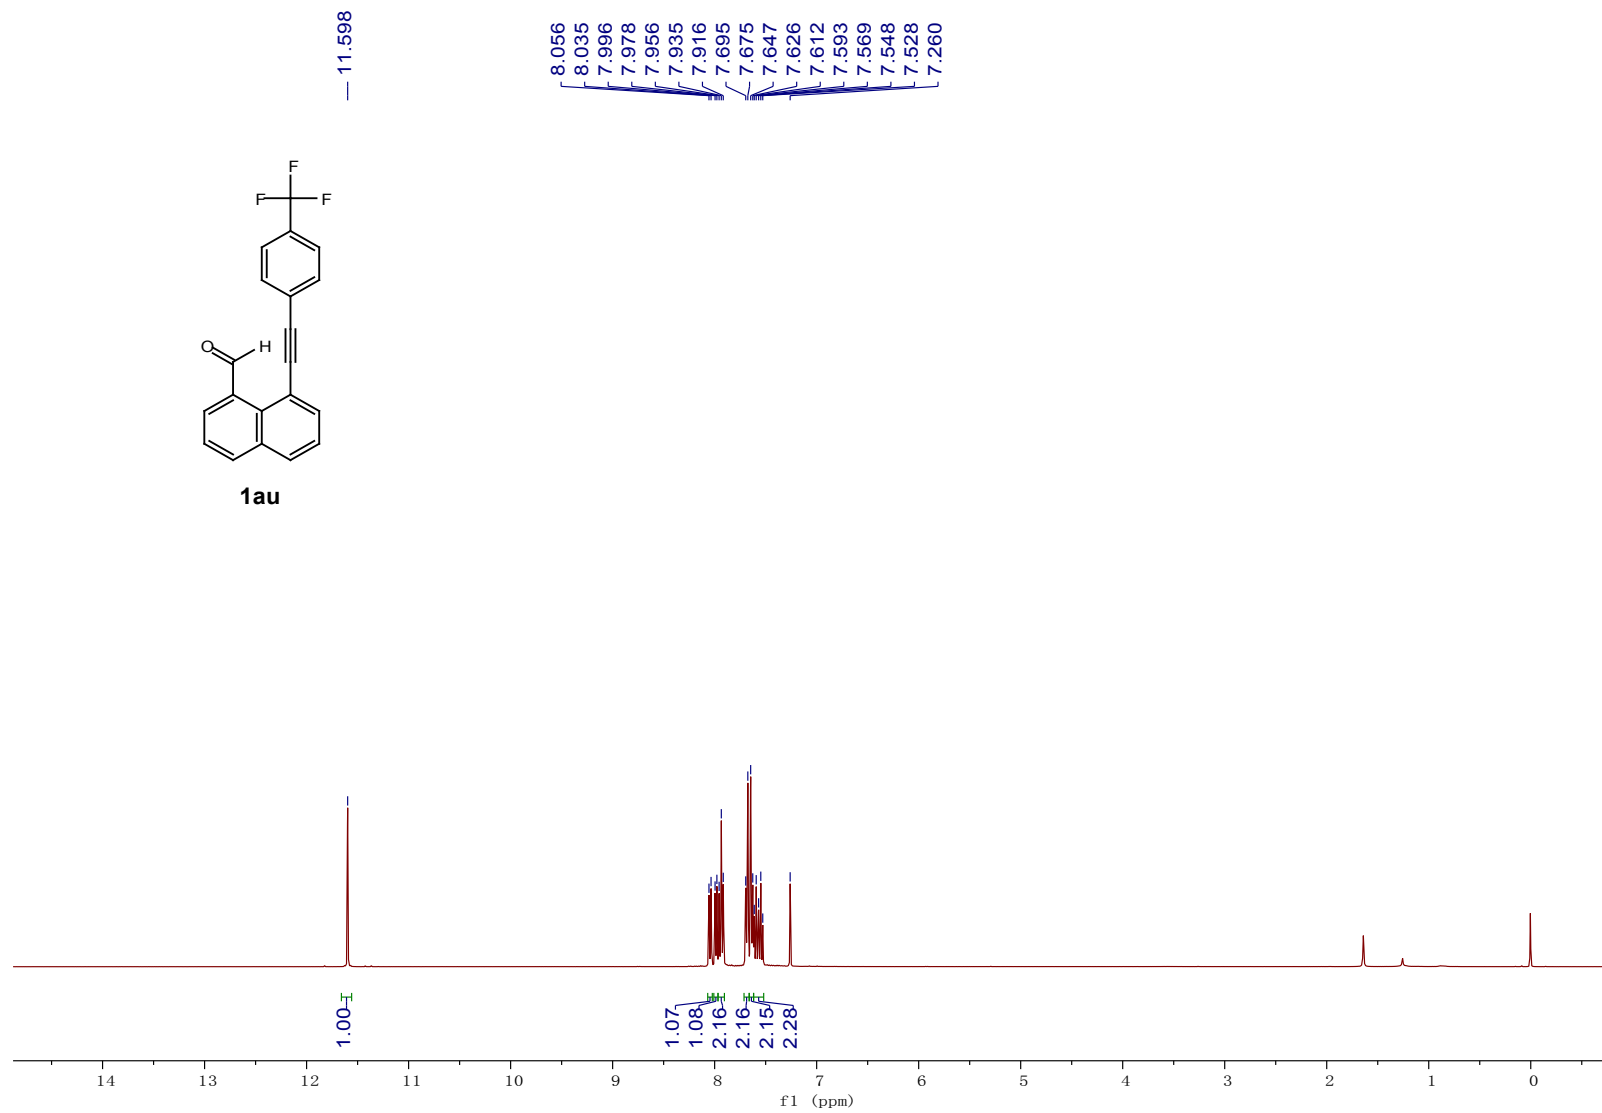



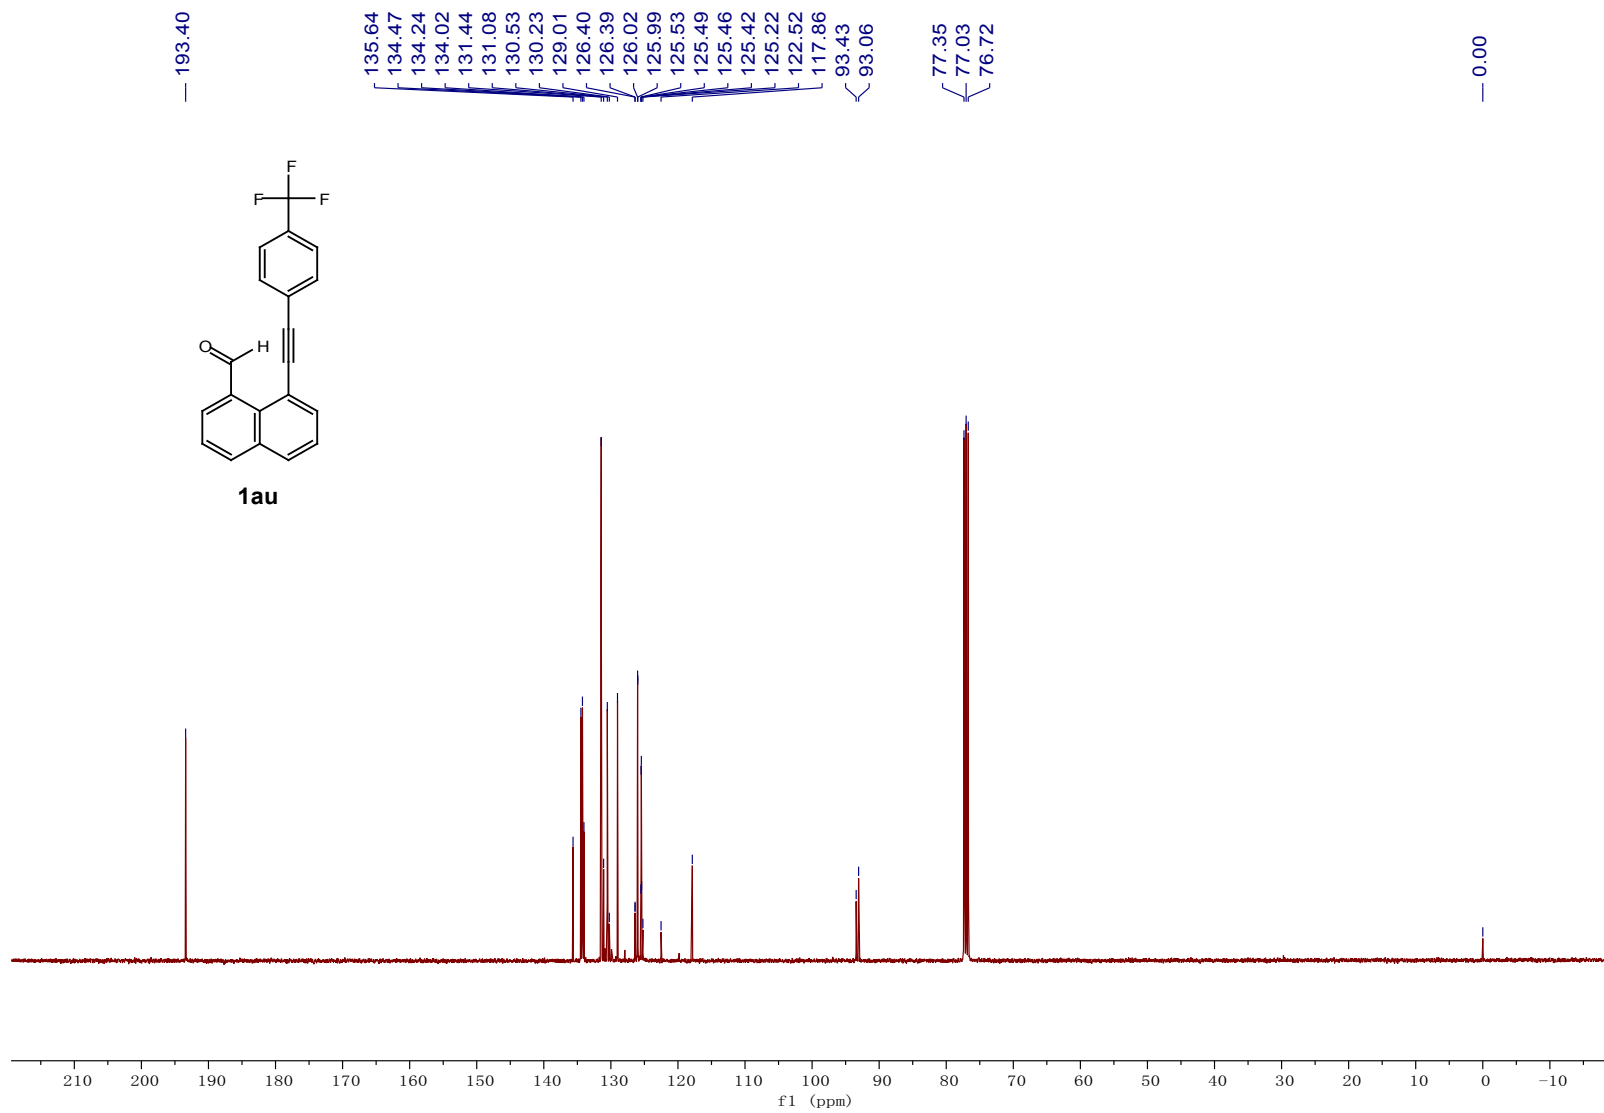

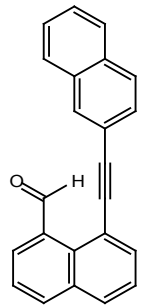

**1av**

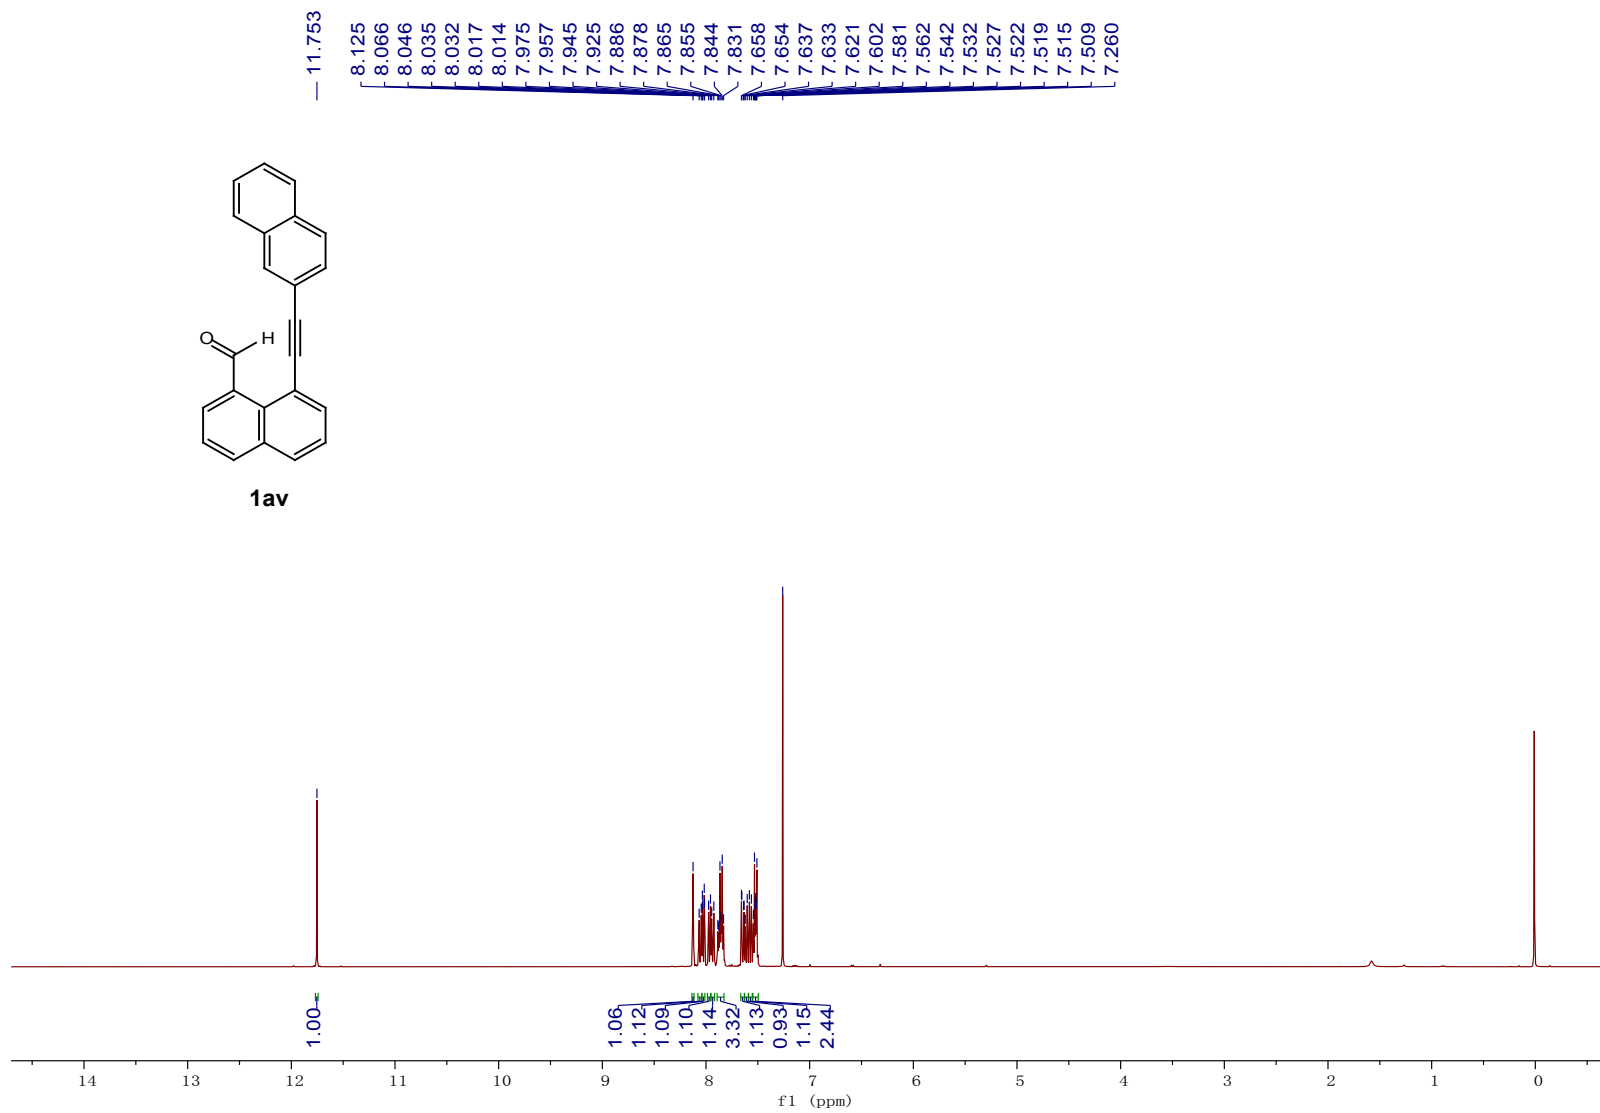



**1av**

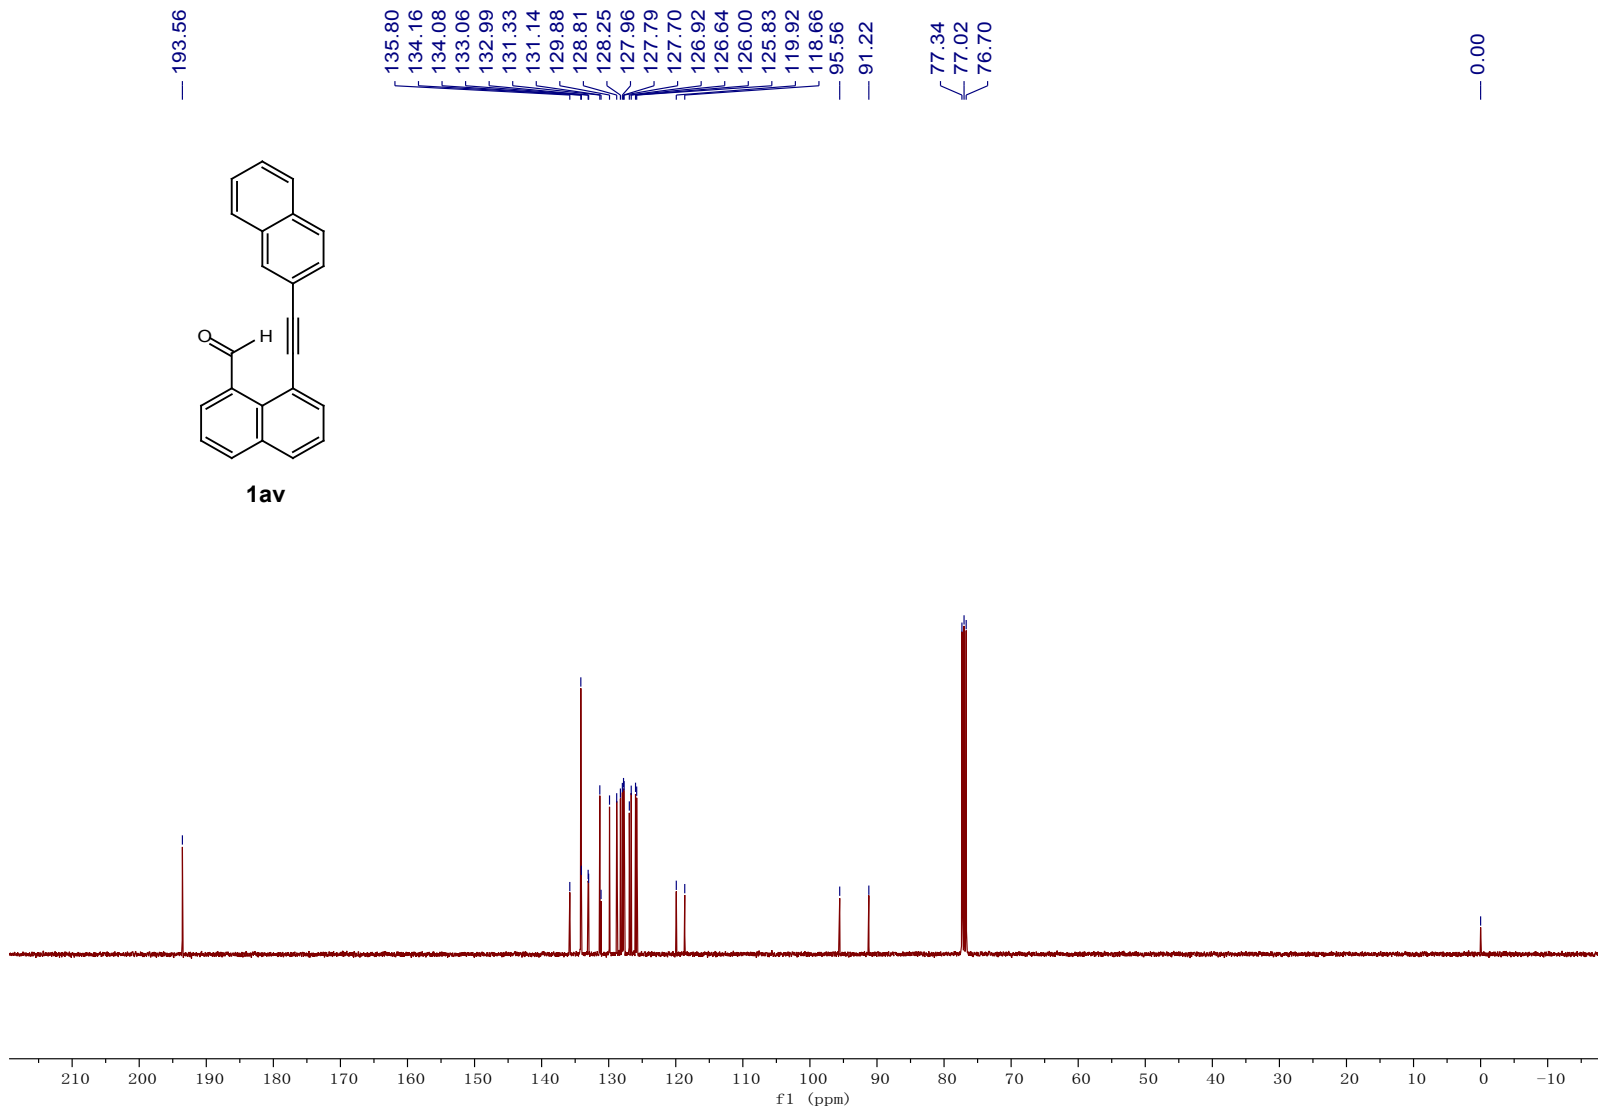

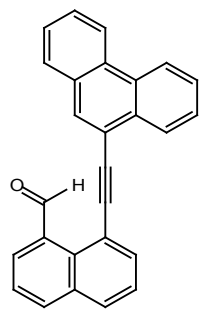

**1aw**

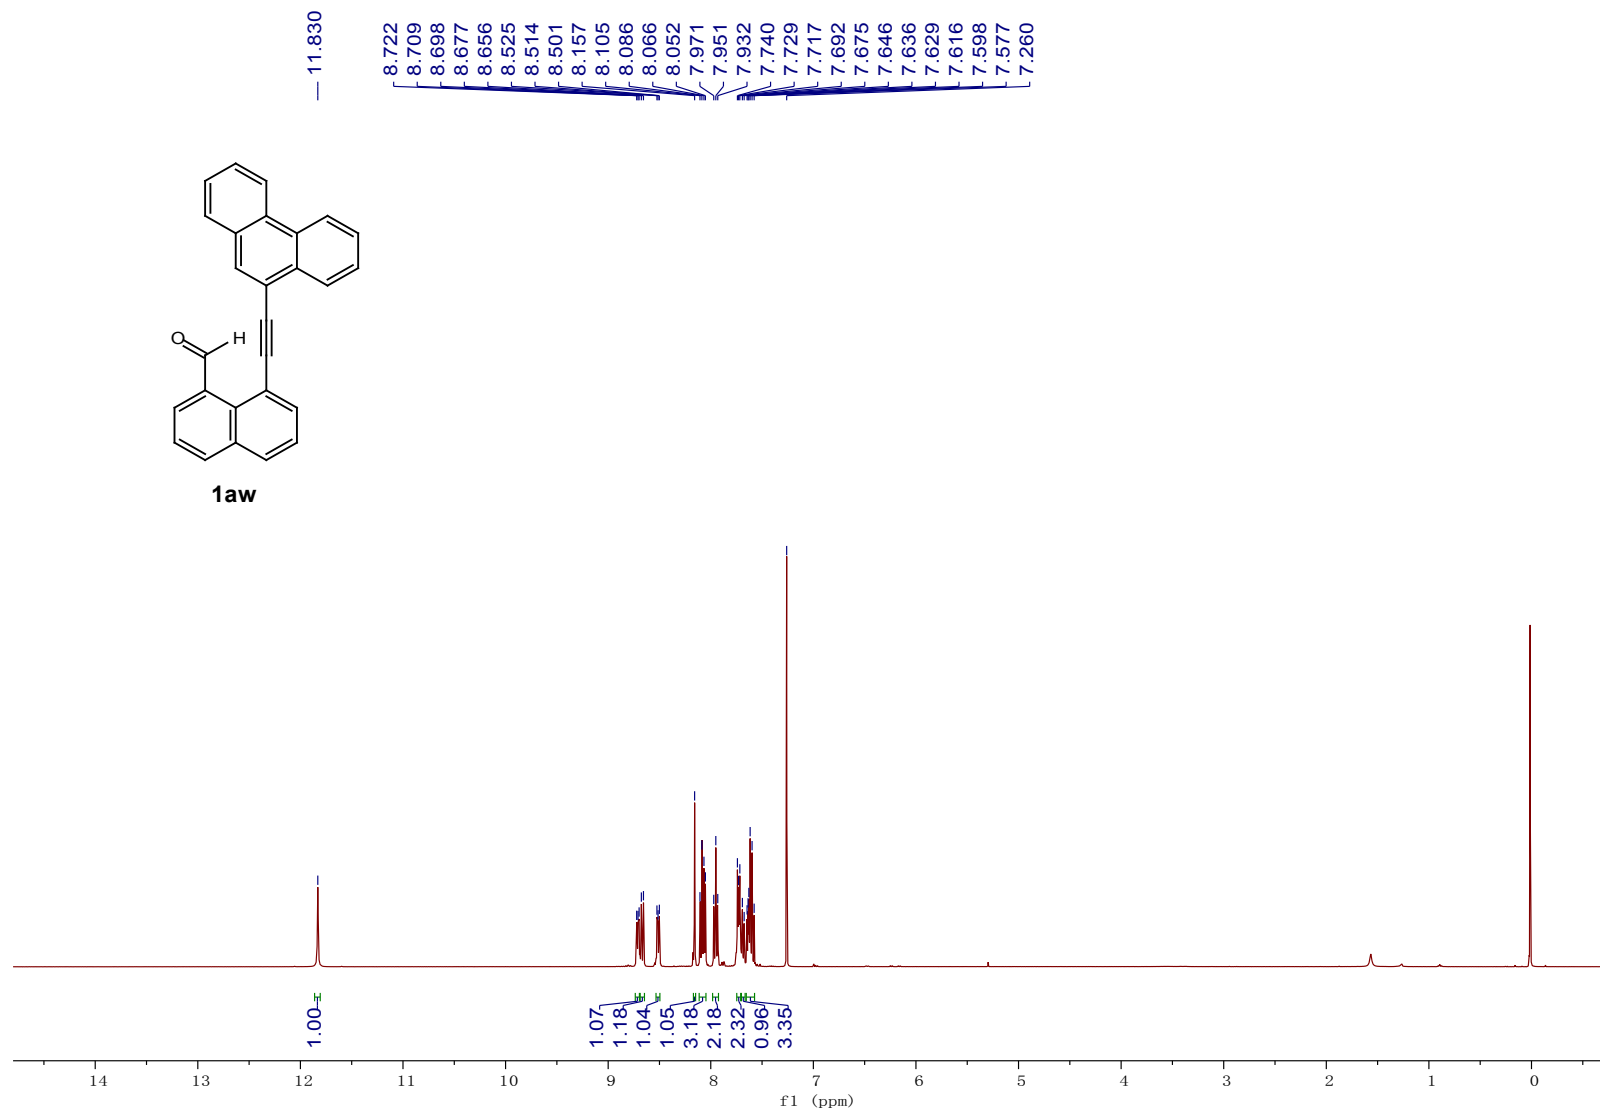



**1aw**

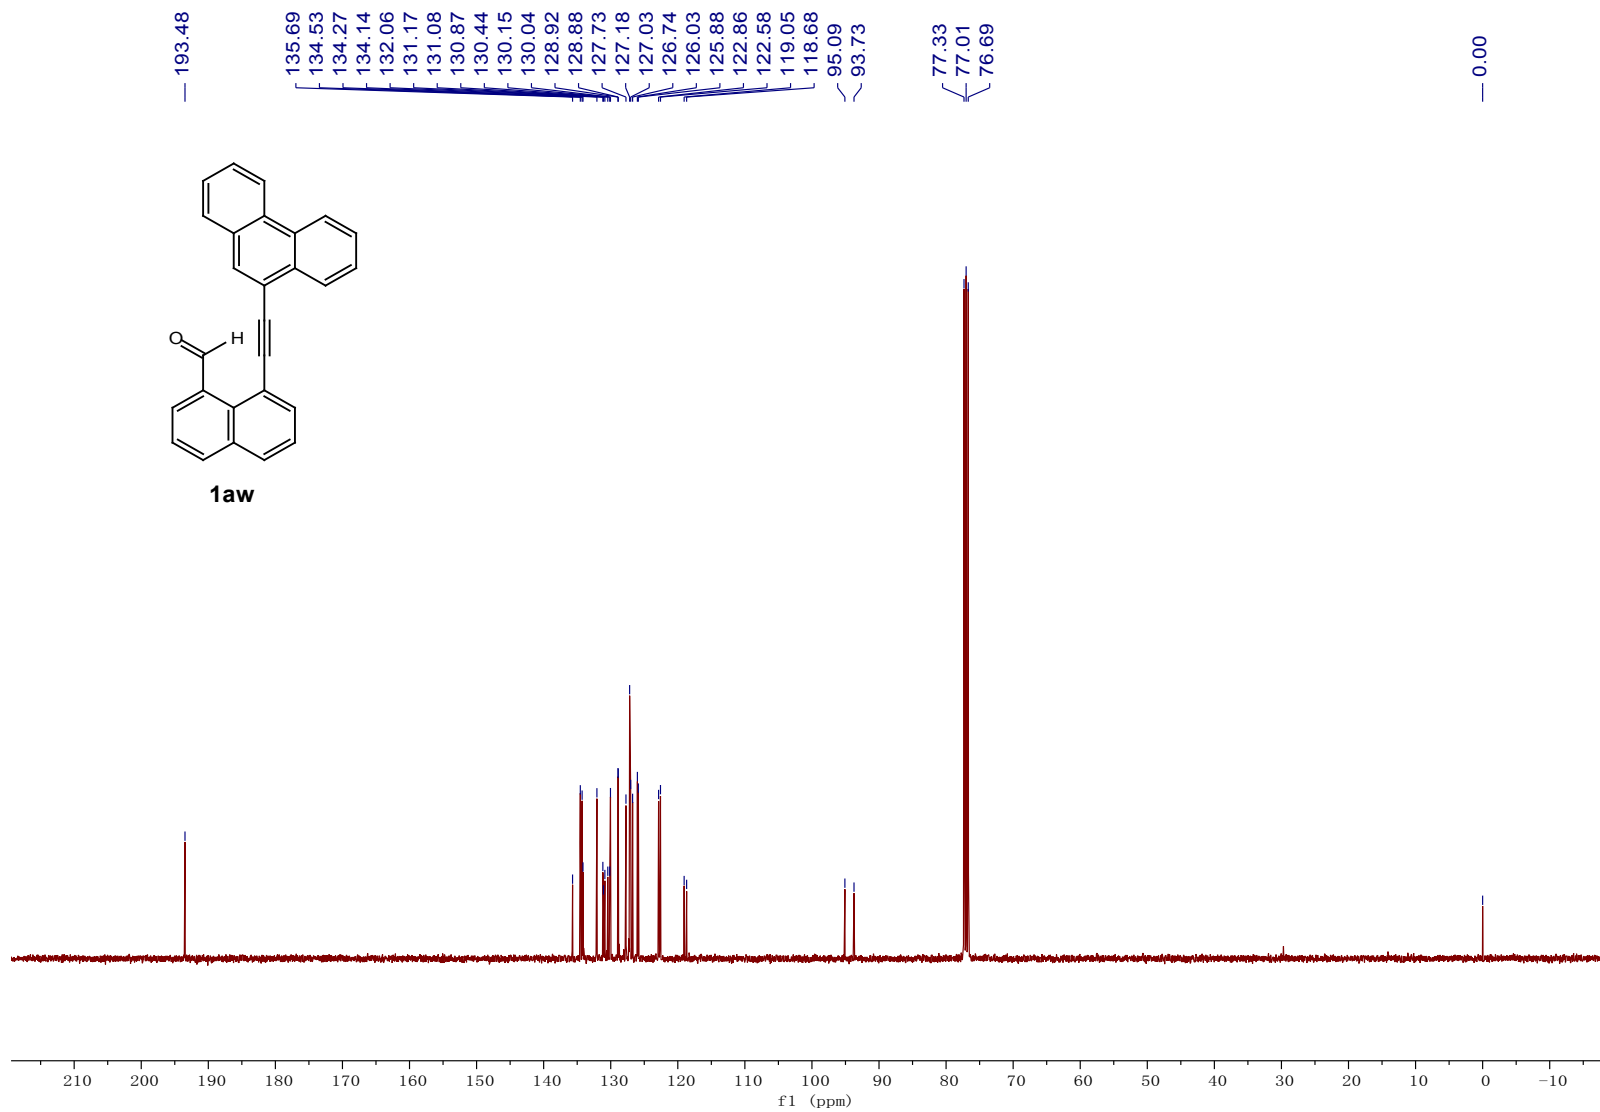

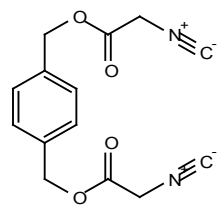

**2e**

7.392  
7.260

5.239

4.263

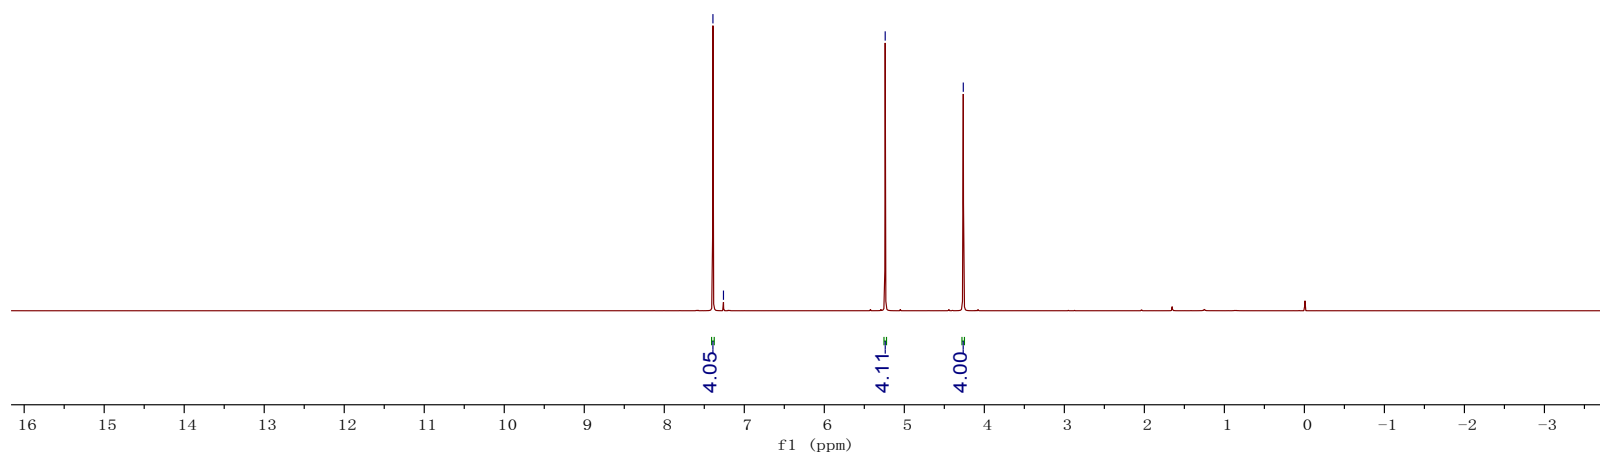



2e

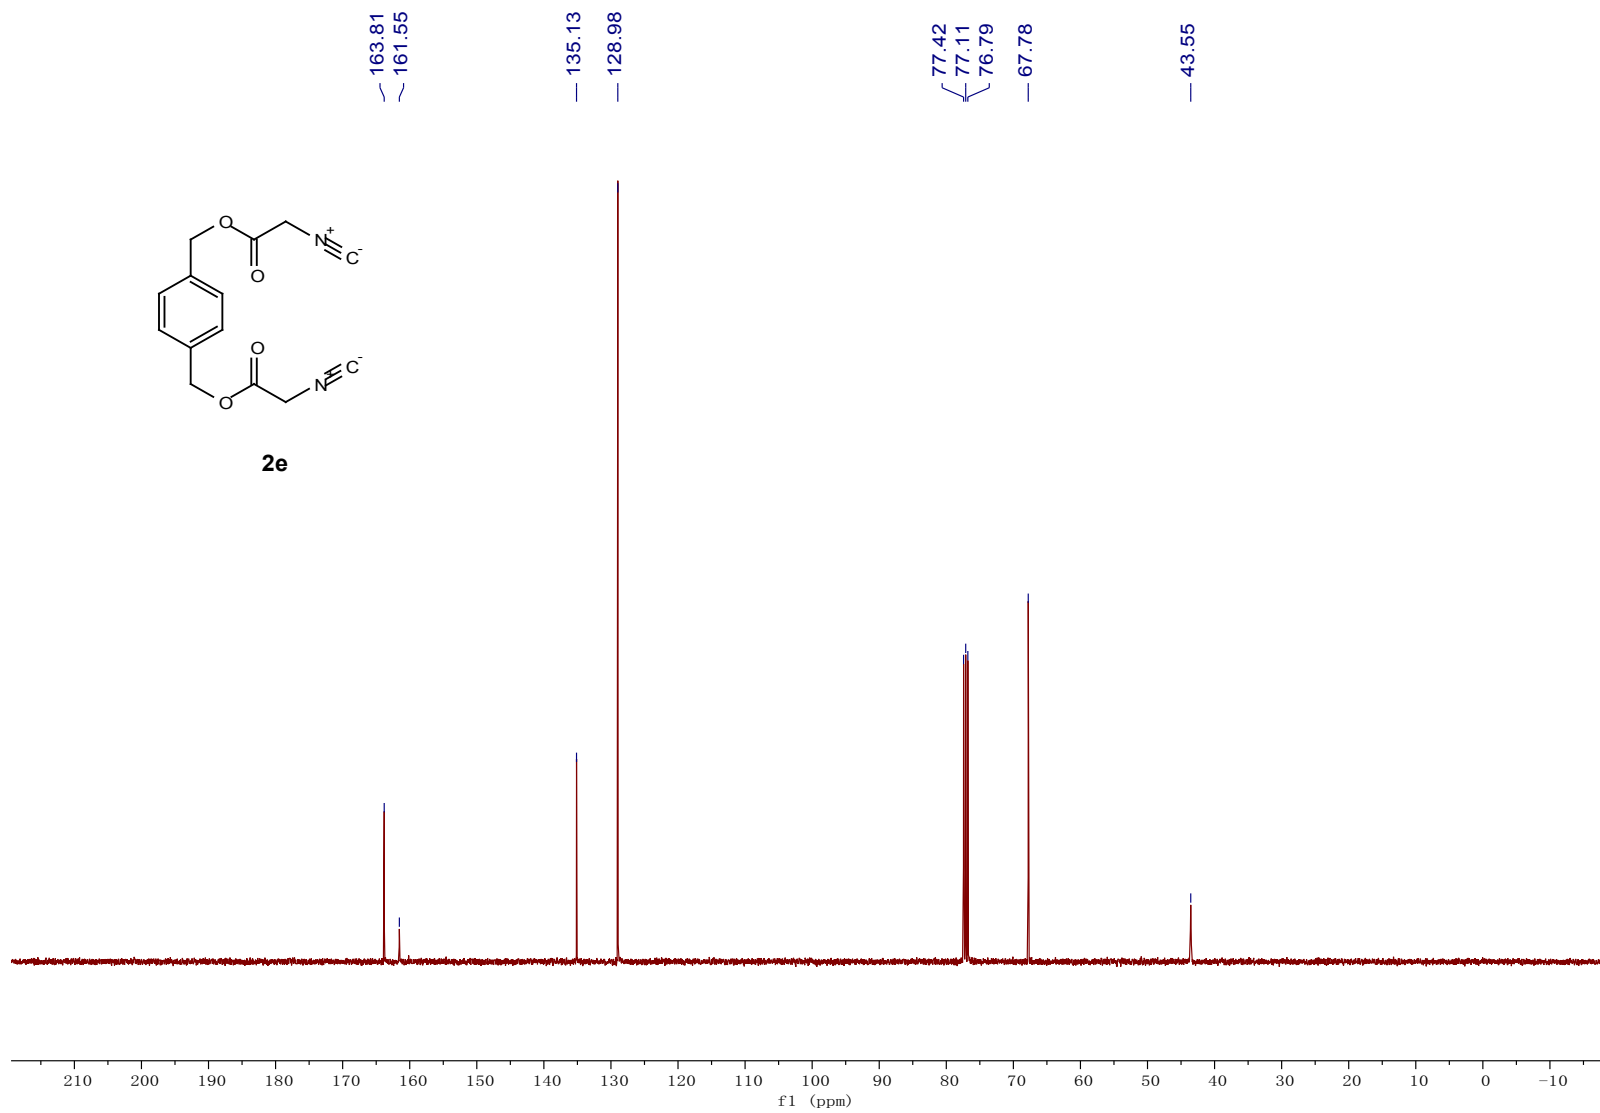

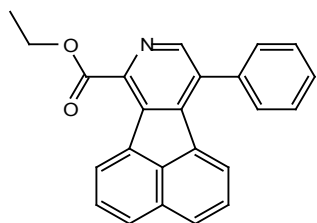

3aa

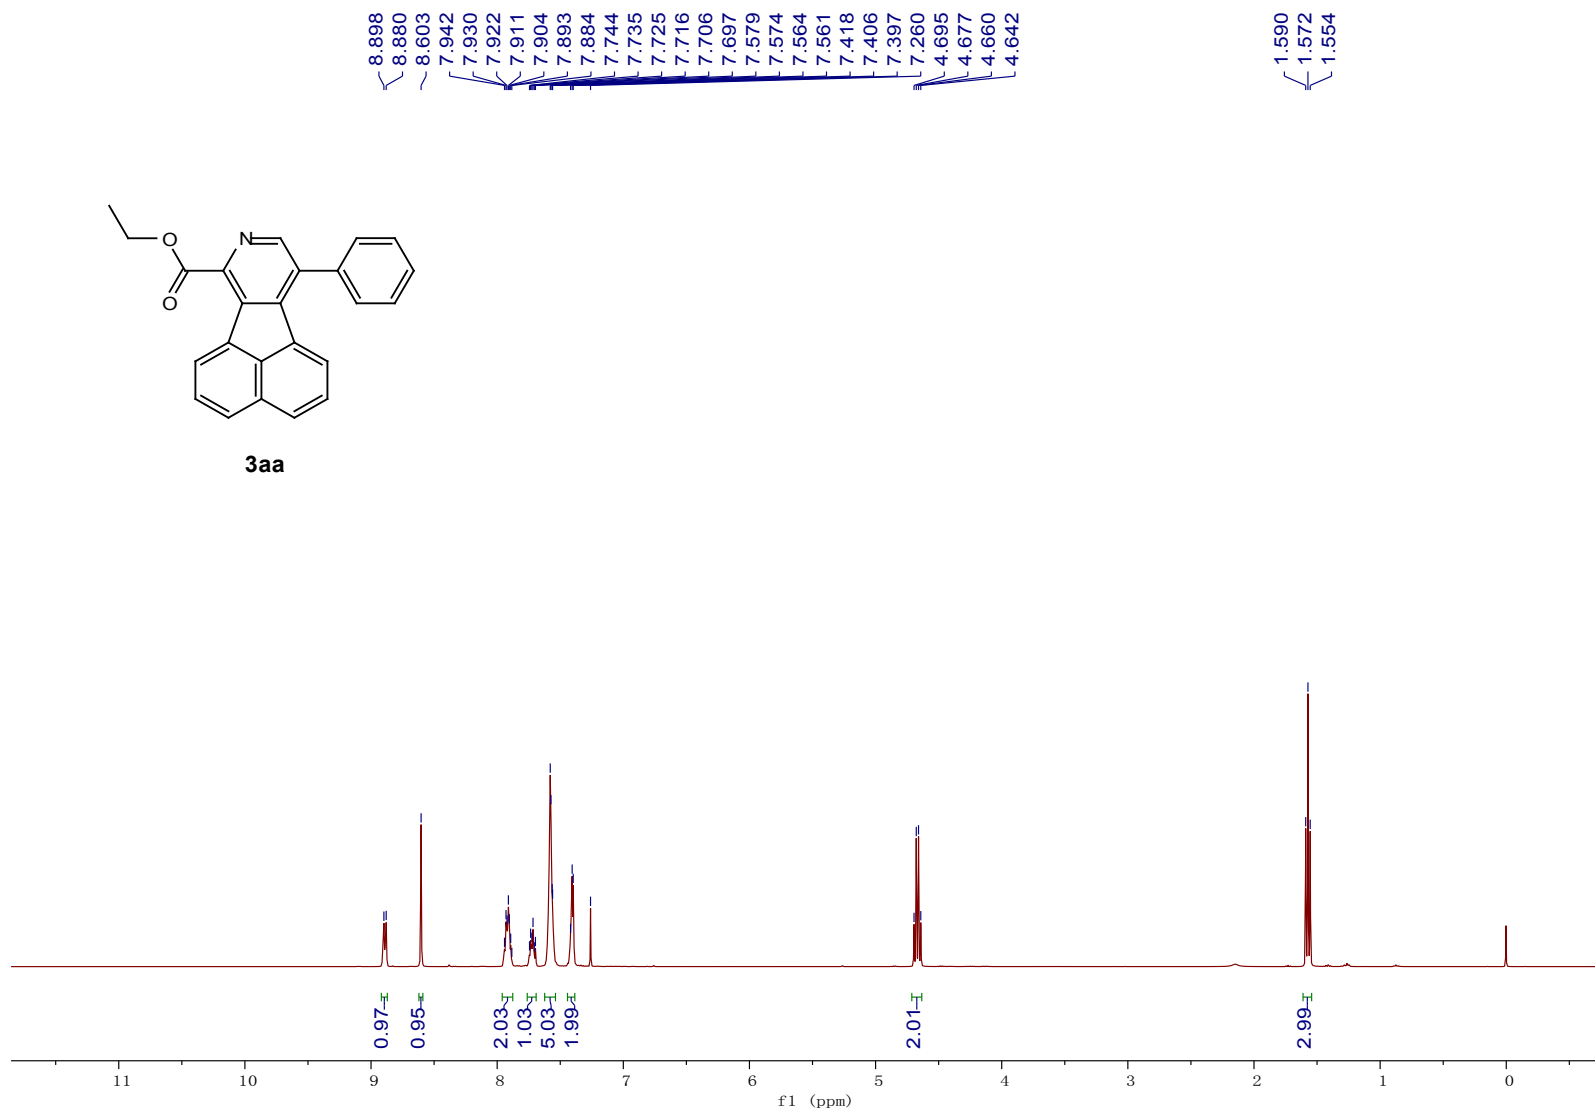





**3aa**

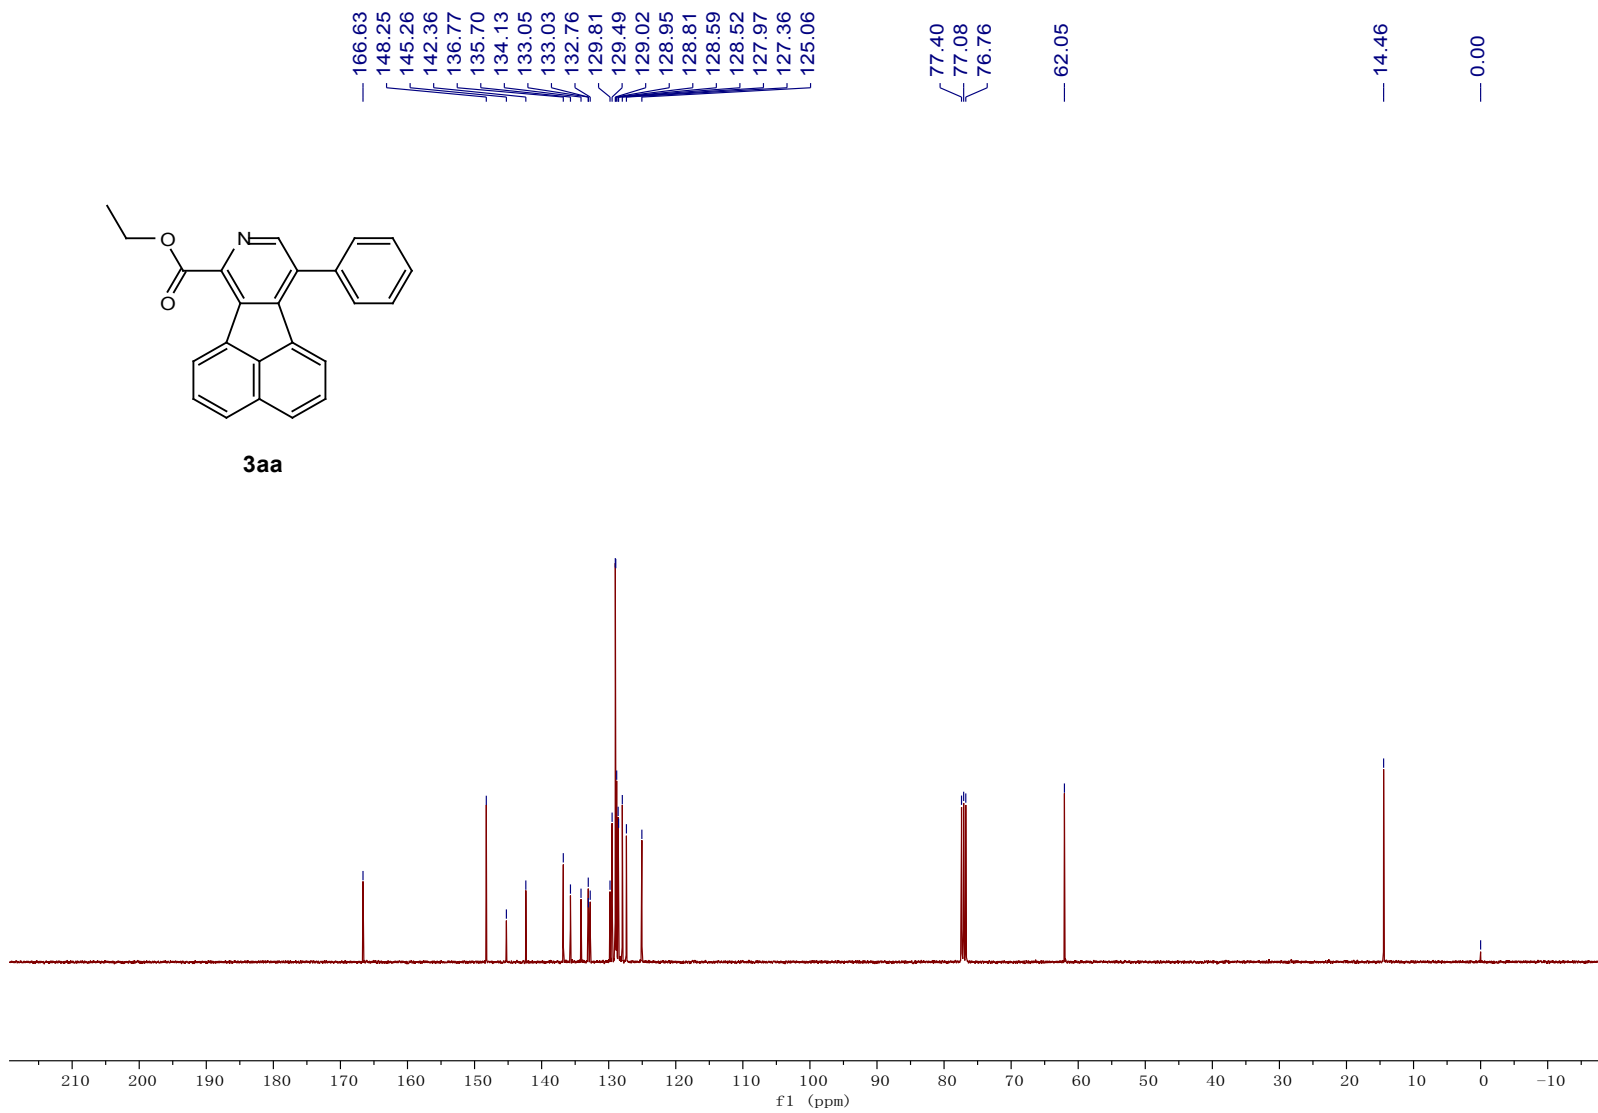

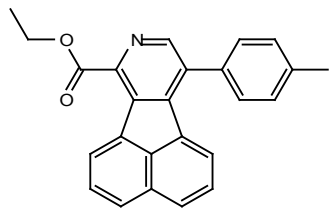

**3ab**

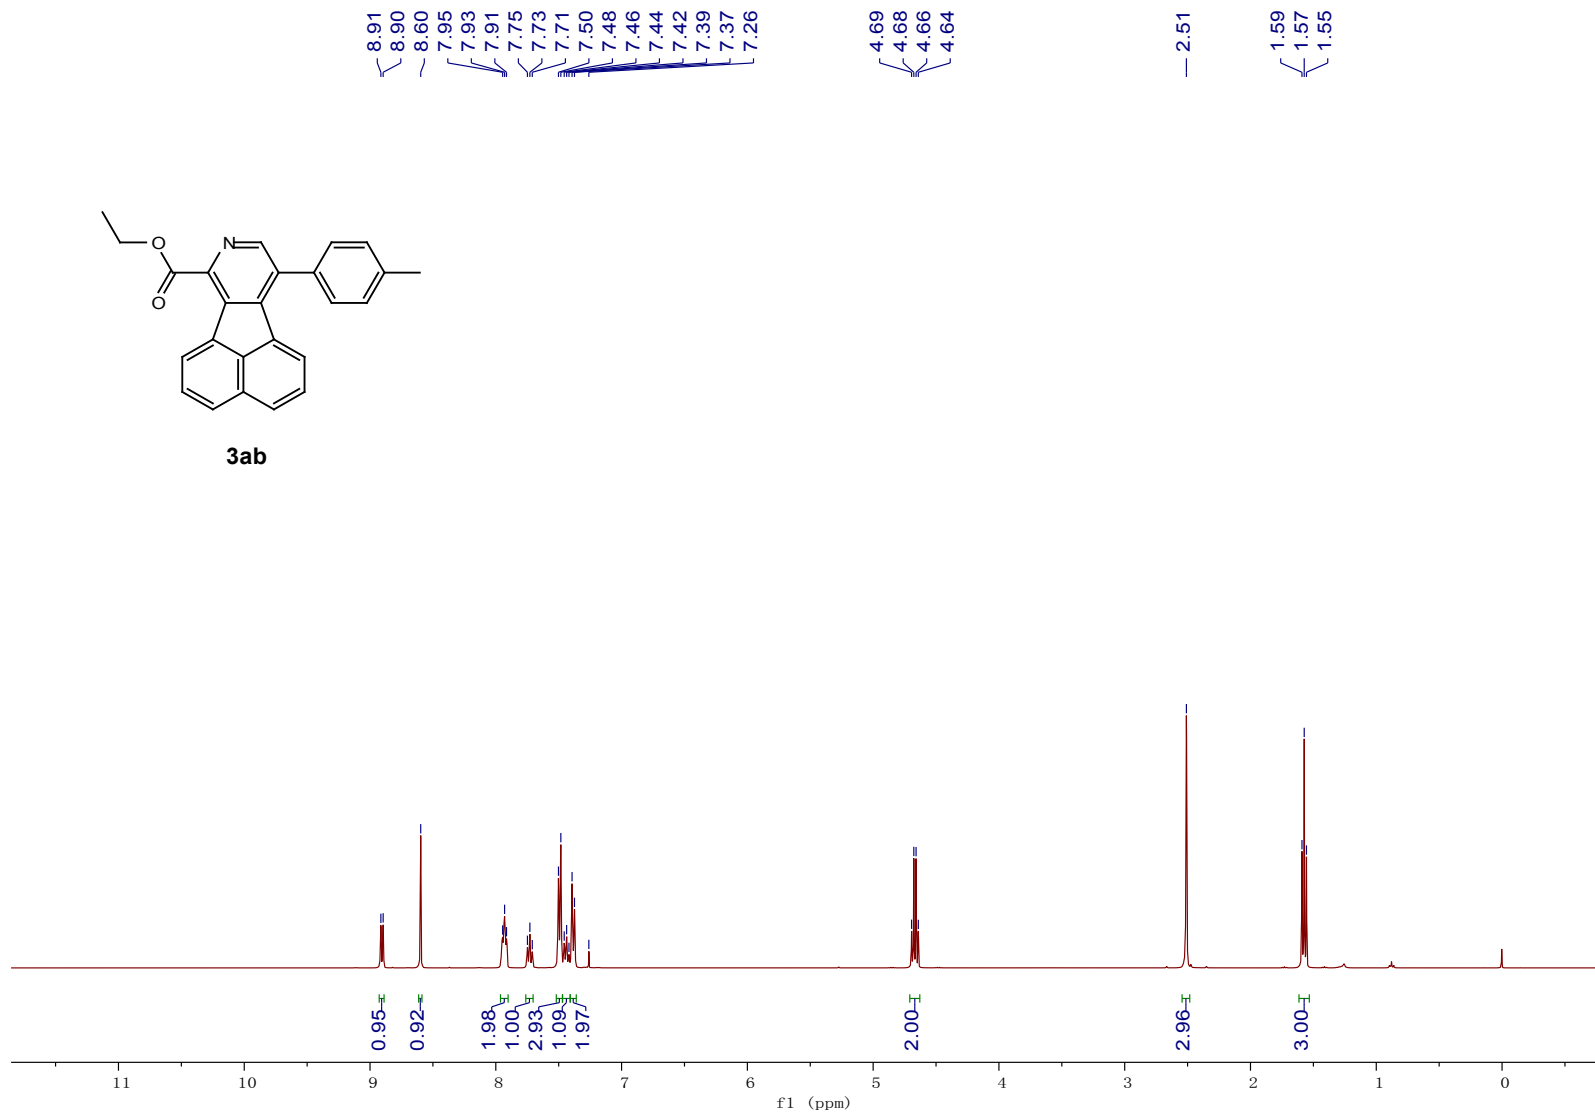

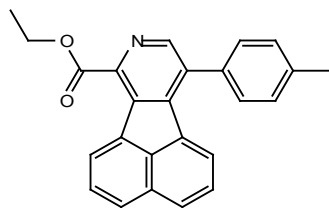

**3ab**

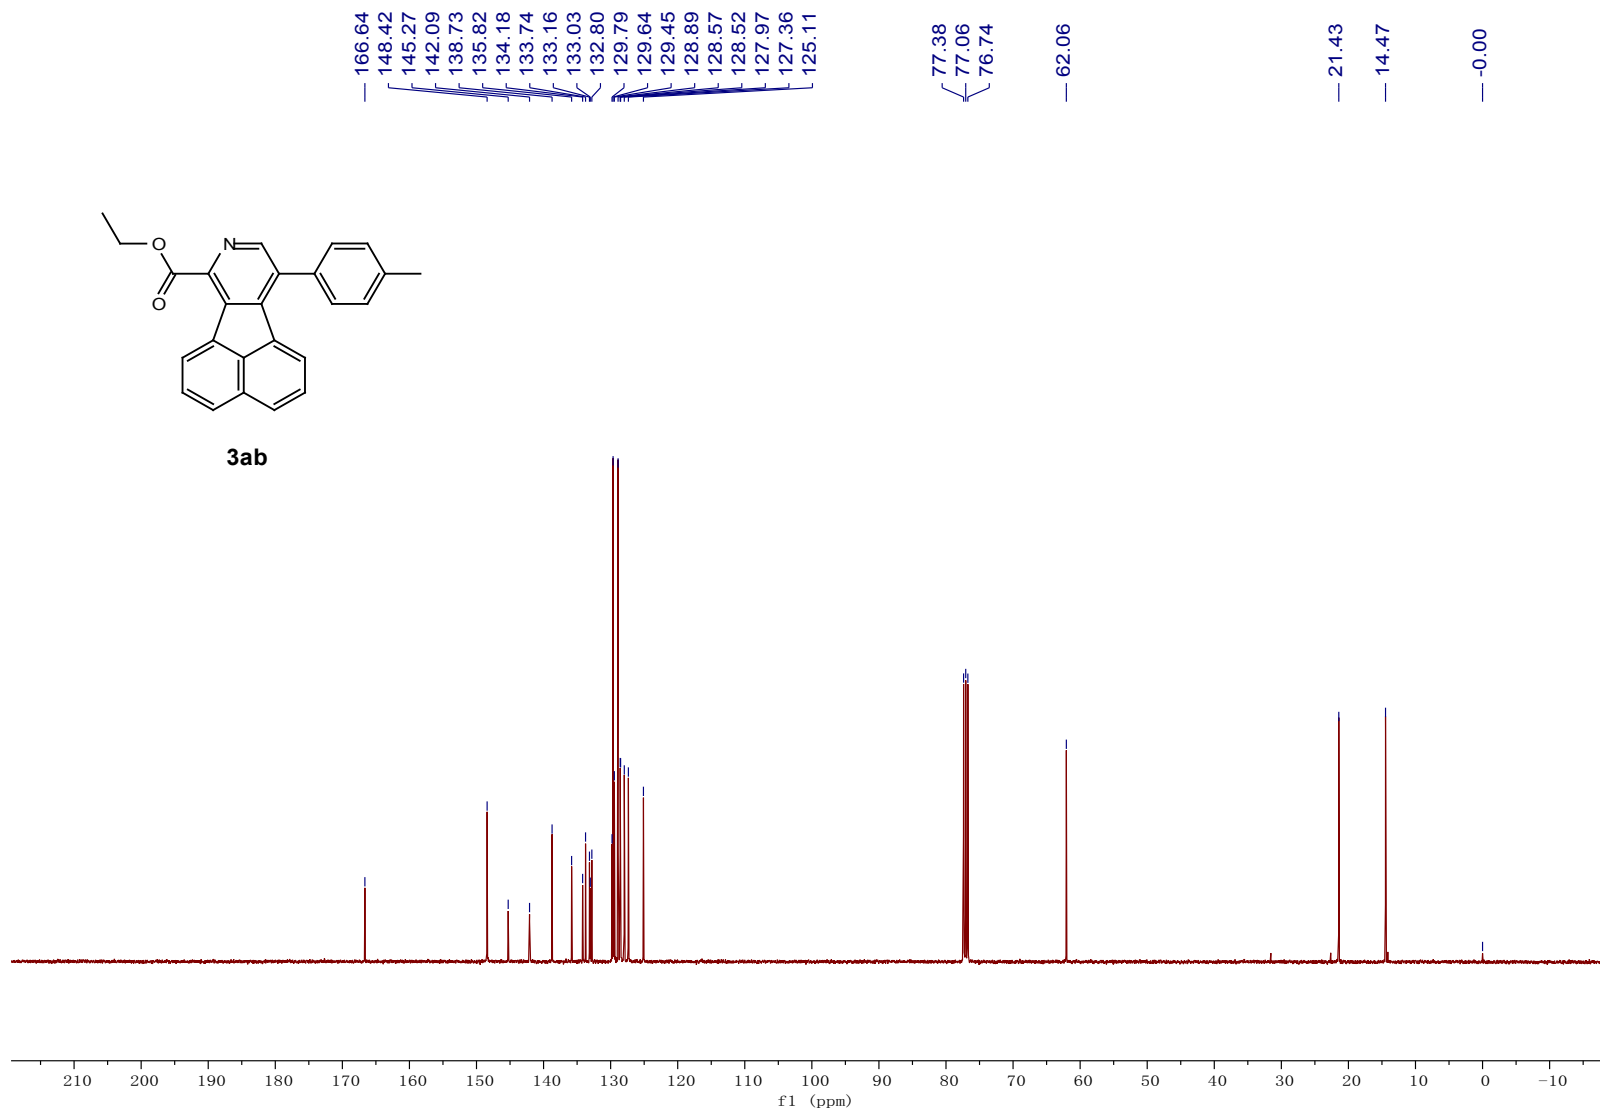

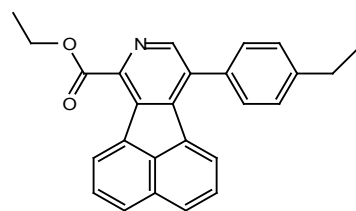

3ac

8.930  
8.912  
8.609  
7.982  
7.968  
7.962  
7.950  
7.774  
7.756  
7.736  
7.546  
7.526  
7.510  
7.486  
7.468  
7.449  
7.433  
7.413  
7.260

4.695  
4.677  
4.659  
4.641

2.849  
2.830  
2.811  
2.792

1.589  
1.571  
1.554  
1.393  
1.374  
1.355

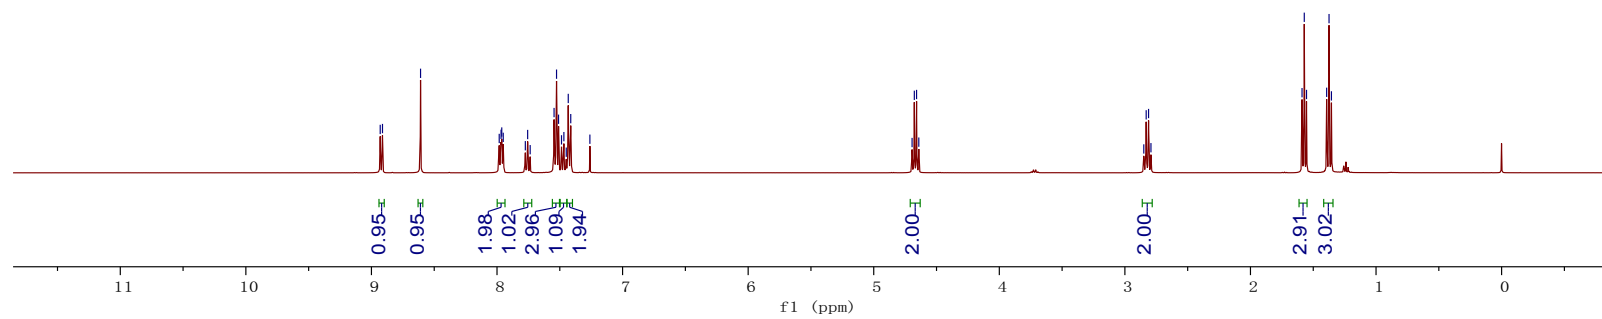



**3ac**

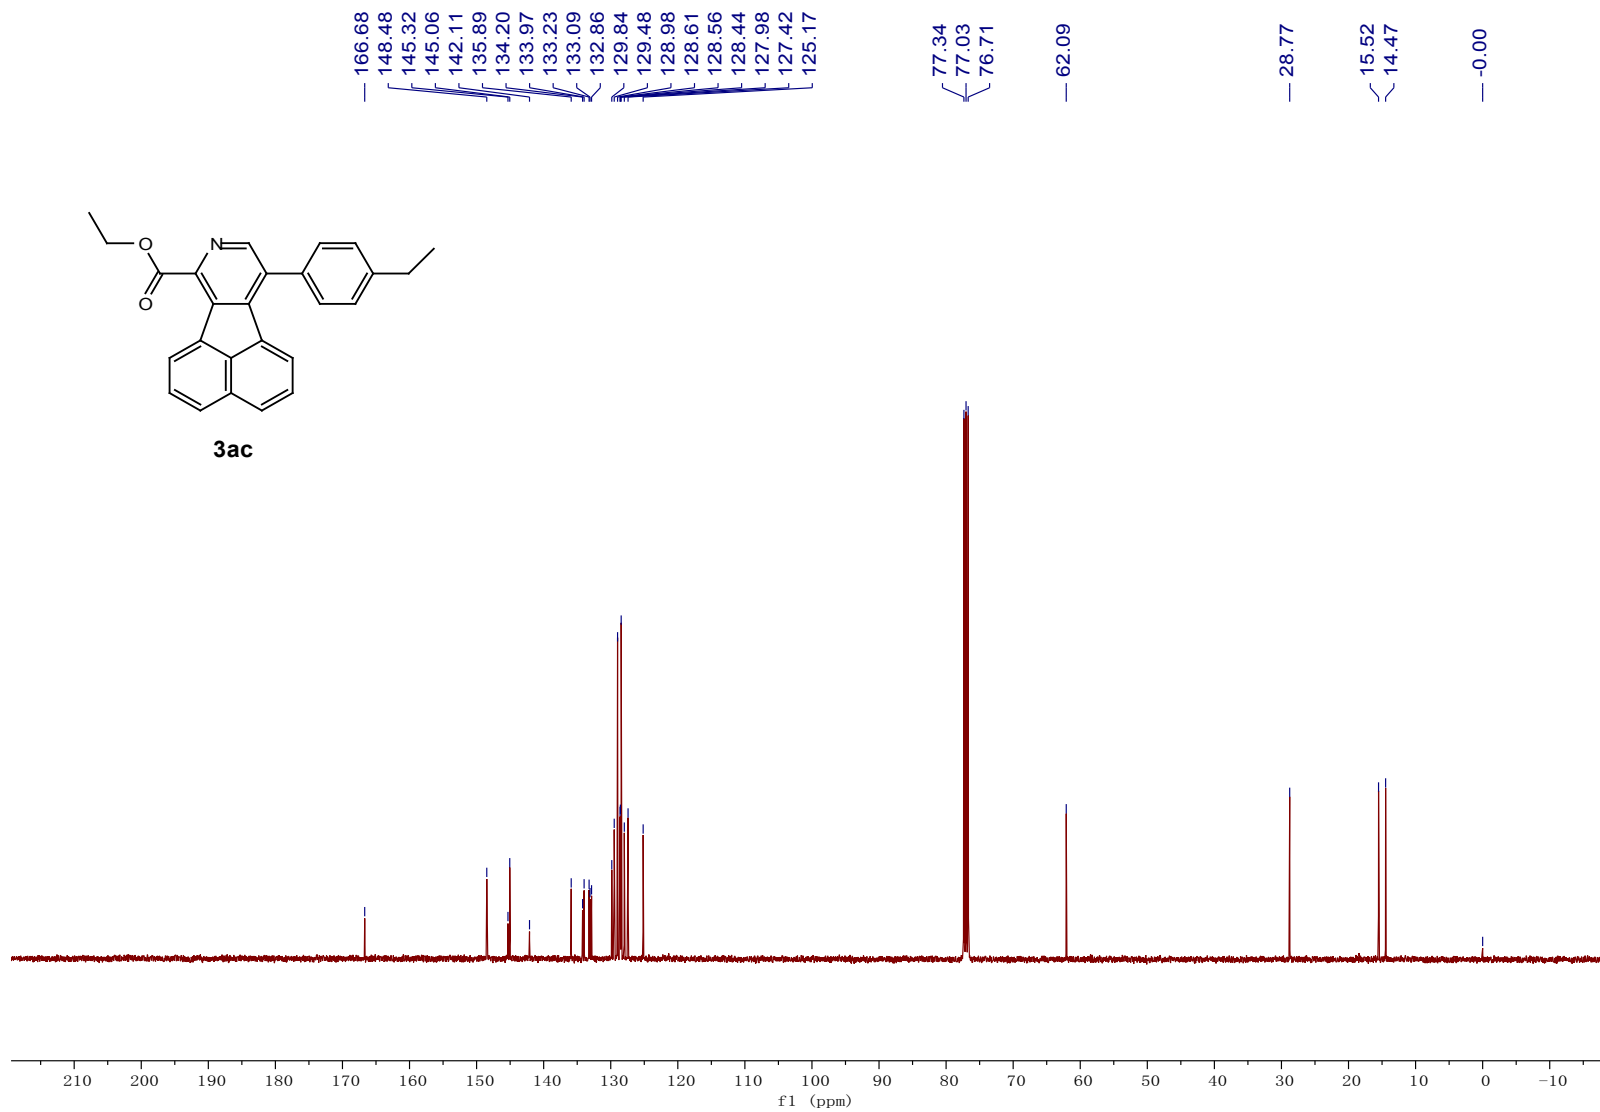

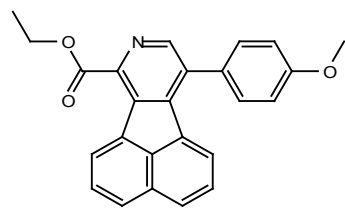

3ad

8.900  
8.882  
8.584  
7.938  
7.926  
7.918  
7.907  
7.738  
7.719  
7.699  
7.527  
7.517  
7.505  
7.454  
7.434  
7.416  
7.260  
7.107  
7.085  
4.686  
4.668  
4.650  
4.632  
3.918  
1.583  
1.565  
1.547

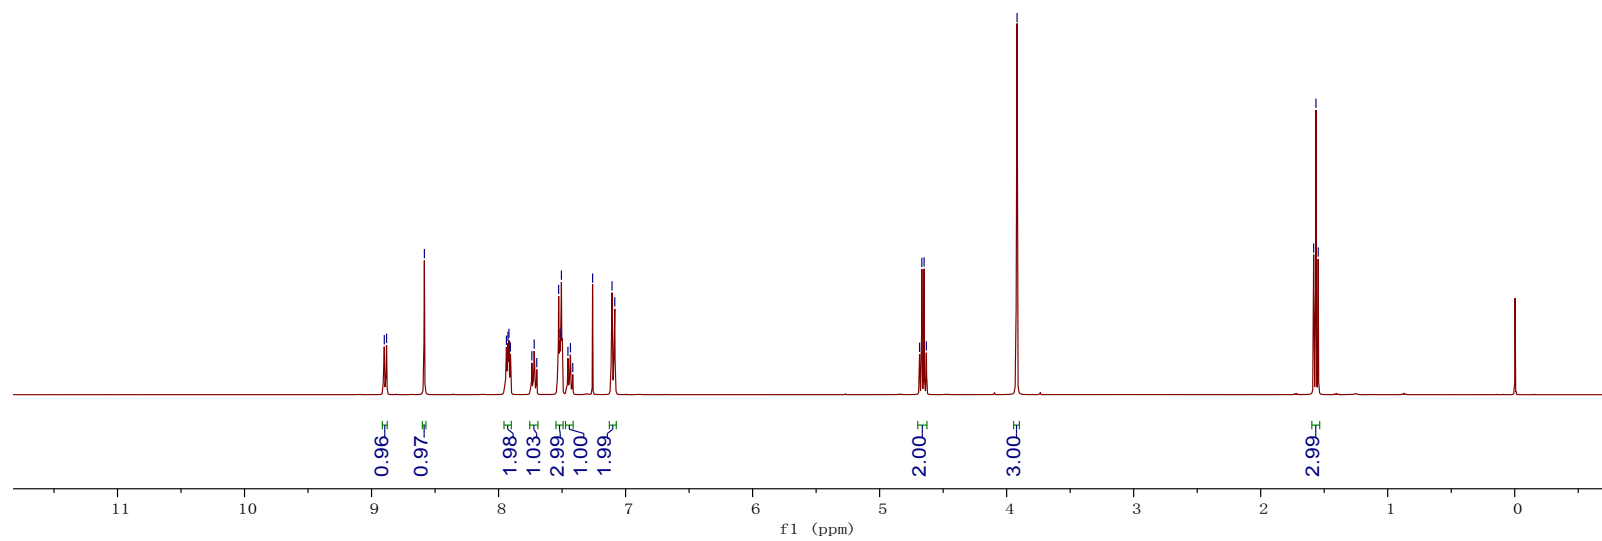



**3ad**

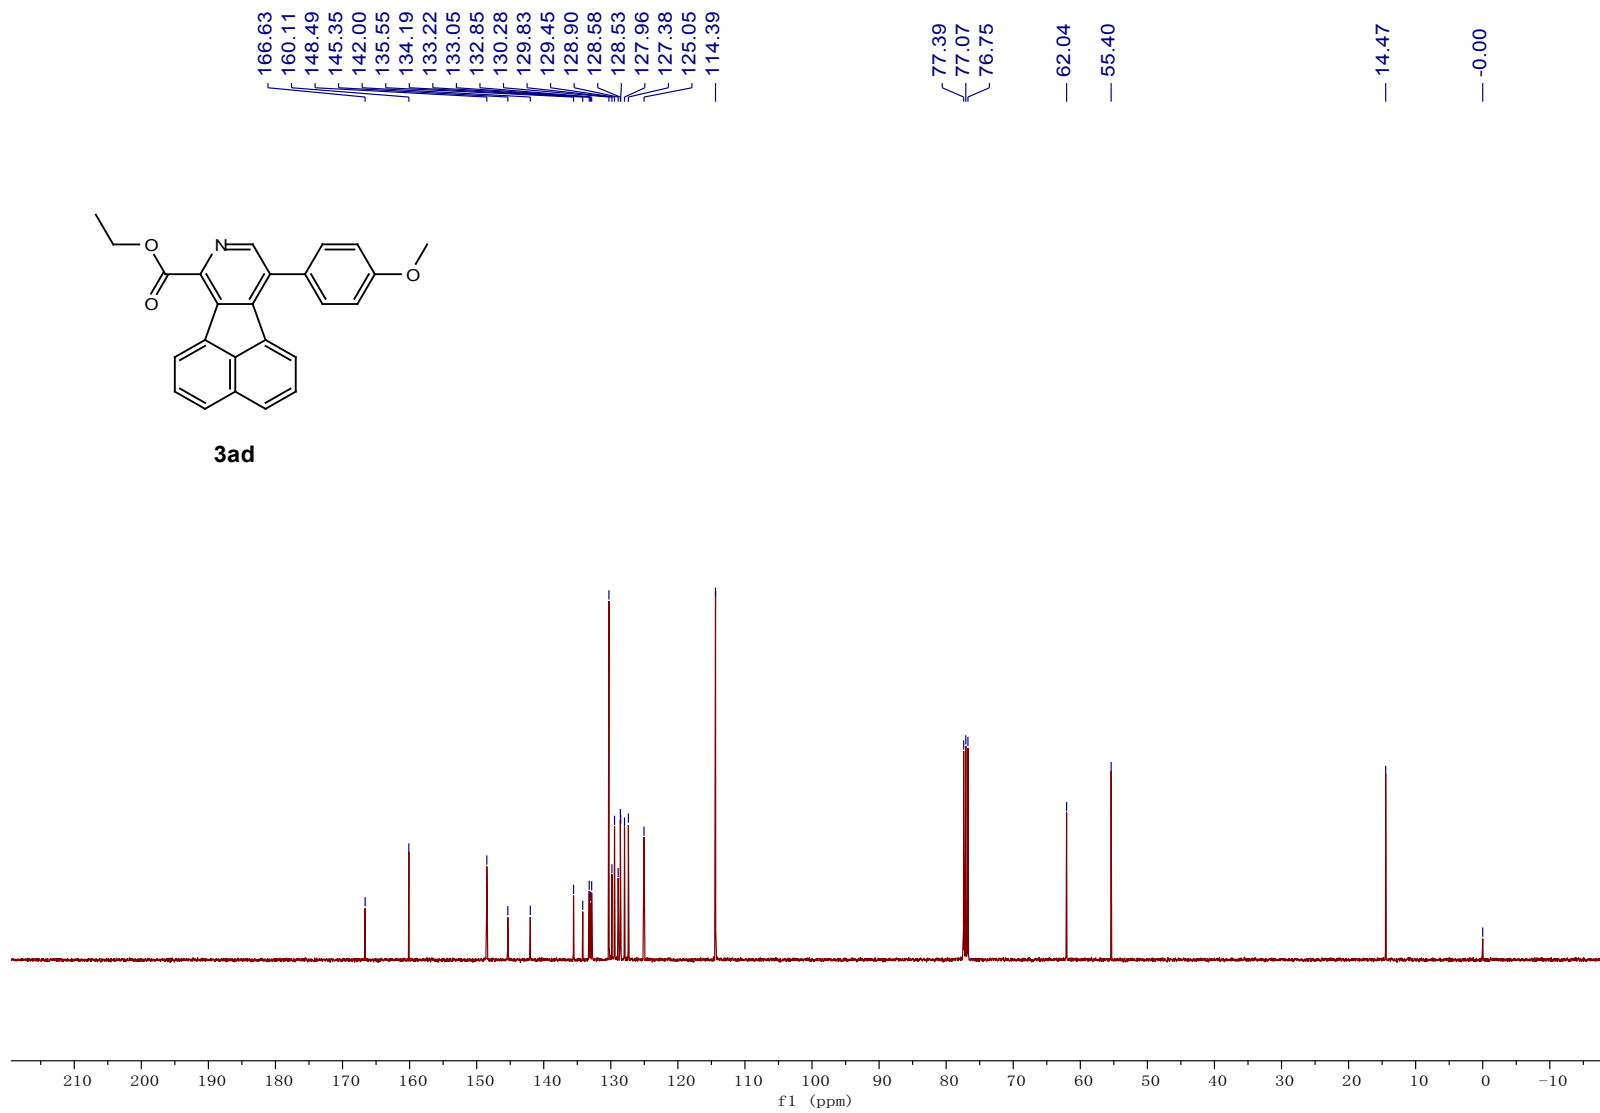

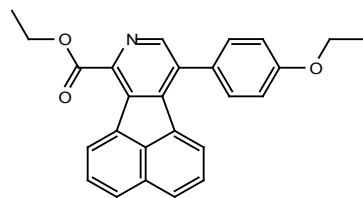

**3ae**

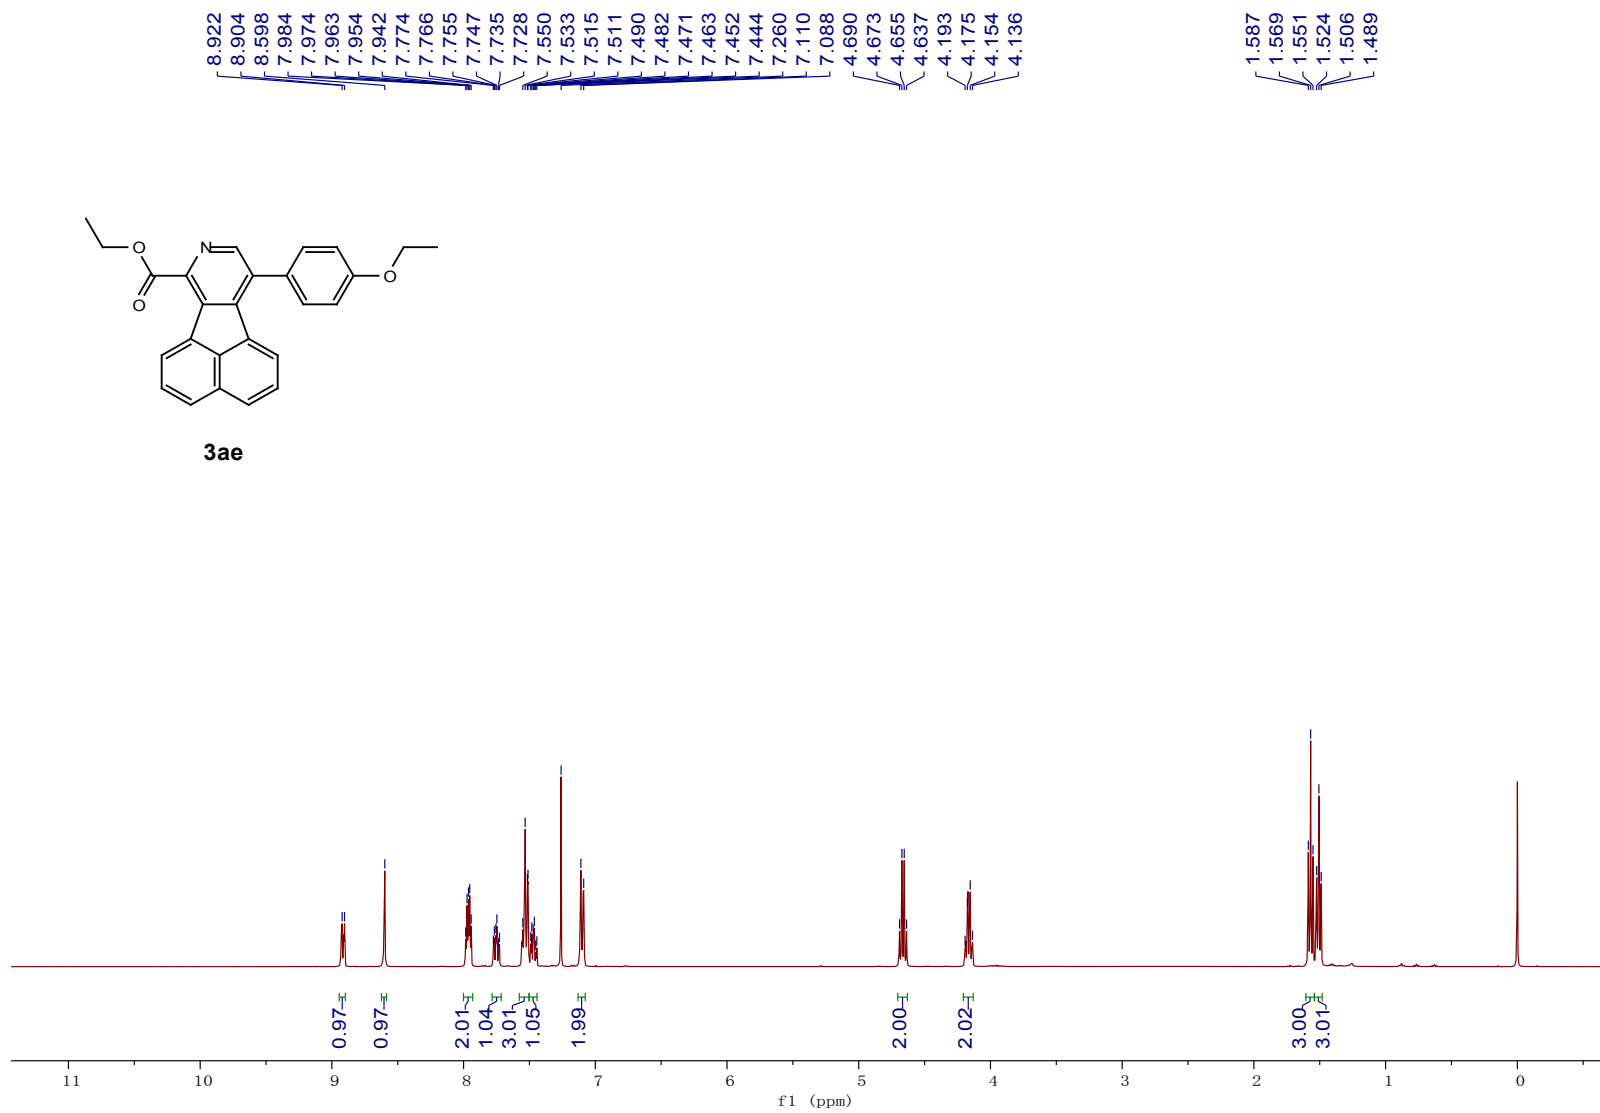





**3ae**

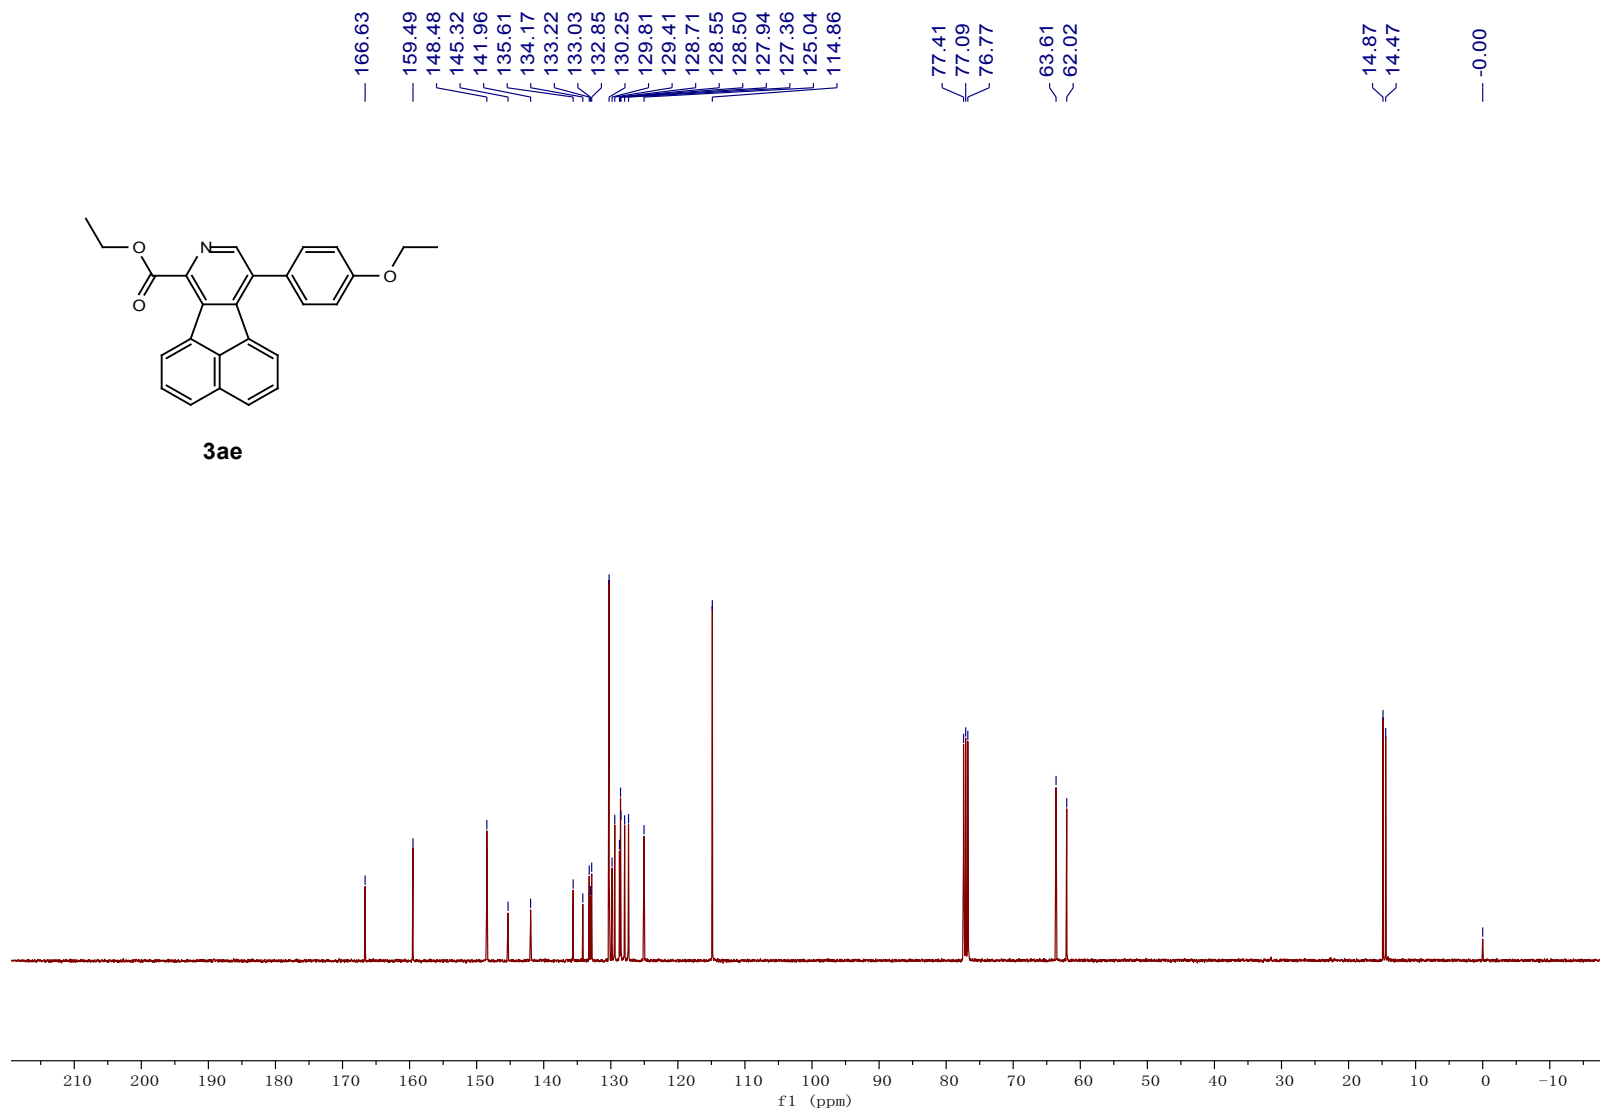

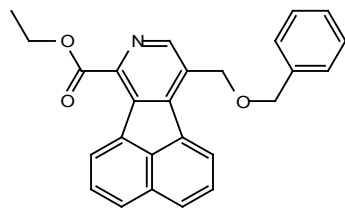

3af

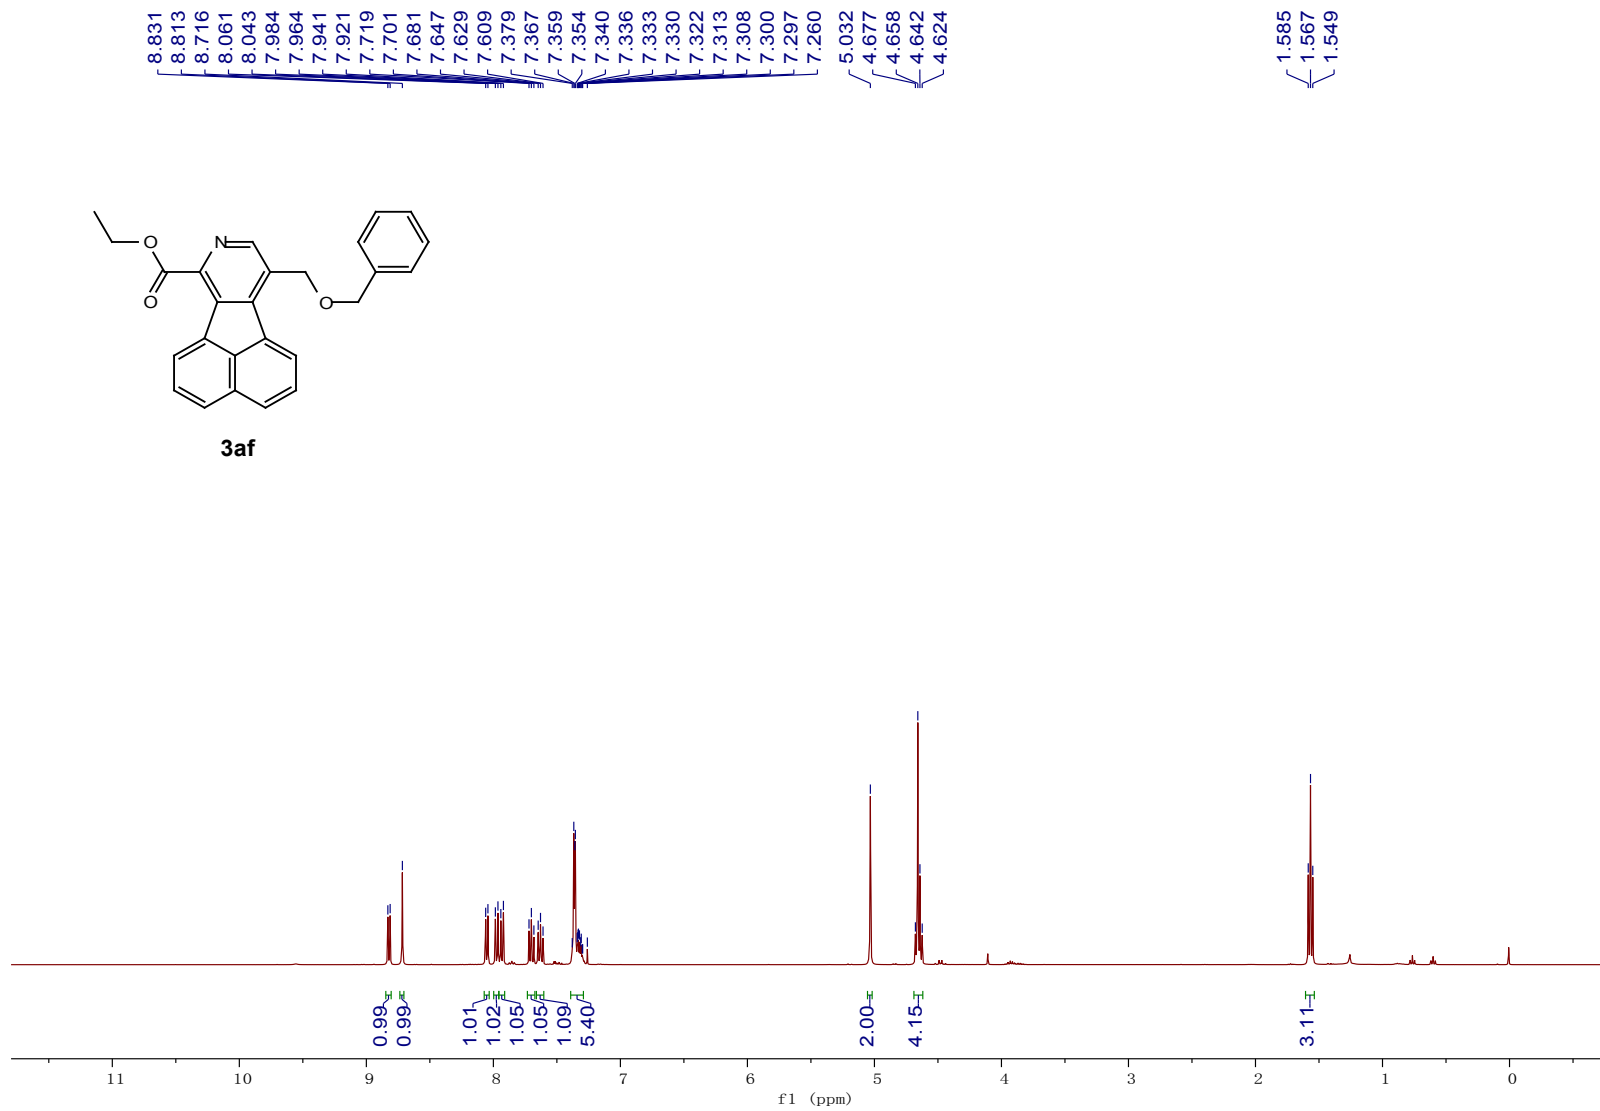



**3af**

166.47  
147.63  
146.42  
143.03  
137.44  
134.19  
132.84  
132.80  
132.72  
130.78  
129.69  
129.61  
128.57  
128.51  
128.49  
127.97  
127.93  
127.92  
127.76  
126.24

77.37  
77.05  
76.73  
72.44  
67.87  
62.09

14.45

-0.00

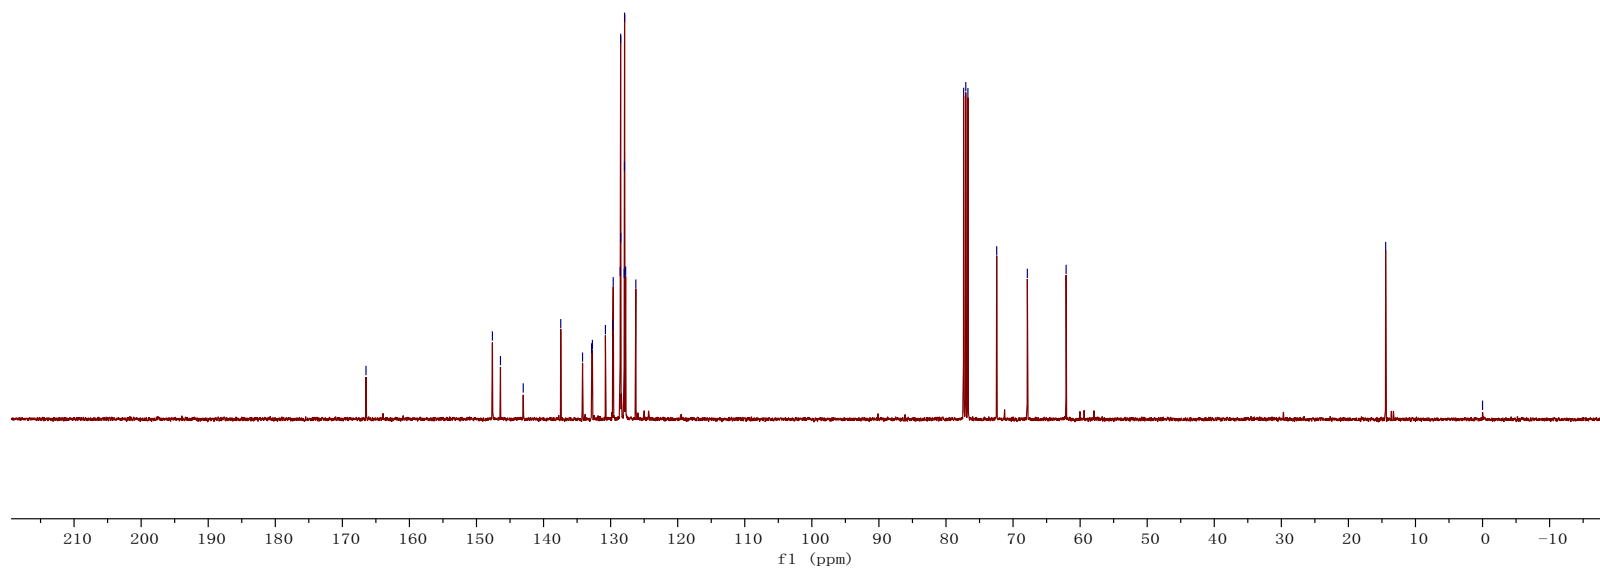

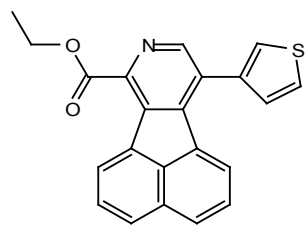

**3ag**

8.908  
8.890  
8.634  
7.977  
7.764  
7.745  
7.725  
7.625  
7.607  
7.595  
7.587  
7.575  
7.570  
7.567  
7.563  
7.524  
7.505  
7.486  
7.379  
7.376  
7.367  
7.364  
7.260  
4.687  
4.669  
4.651  
4.633

1.583  
1.565  
1.547

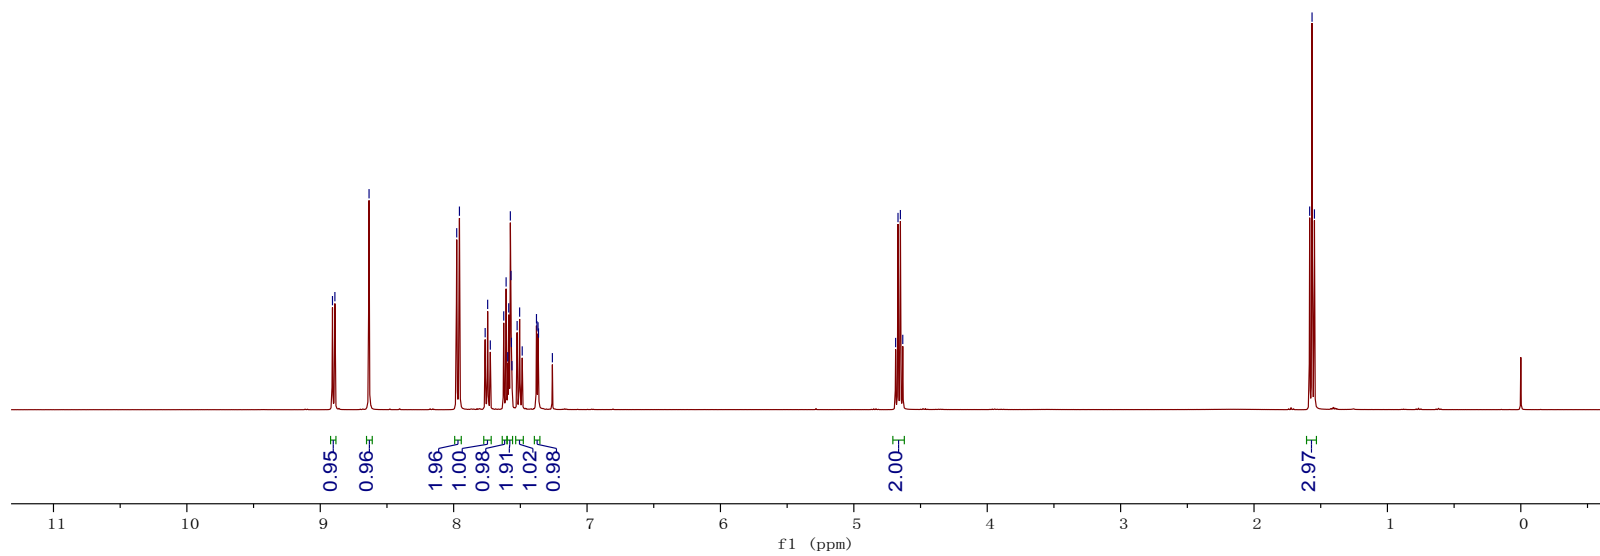

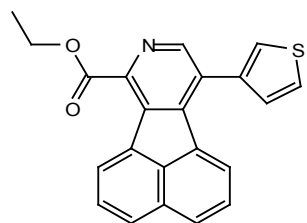

**3ag**

166.61  
148.33  
145.65  
142.42  
137.03  
134.20  
133.10  
133.02  
132.78  
130.80  
129.86  
129.63  
128.66  
128.59  
128.48  
128.06  
127.49  
126.68  
124.98  
124.54

77.35  
77.03  
76.72

62.09

14.46

-0.00

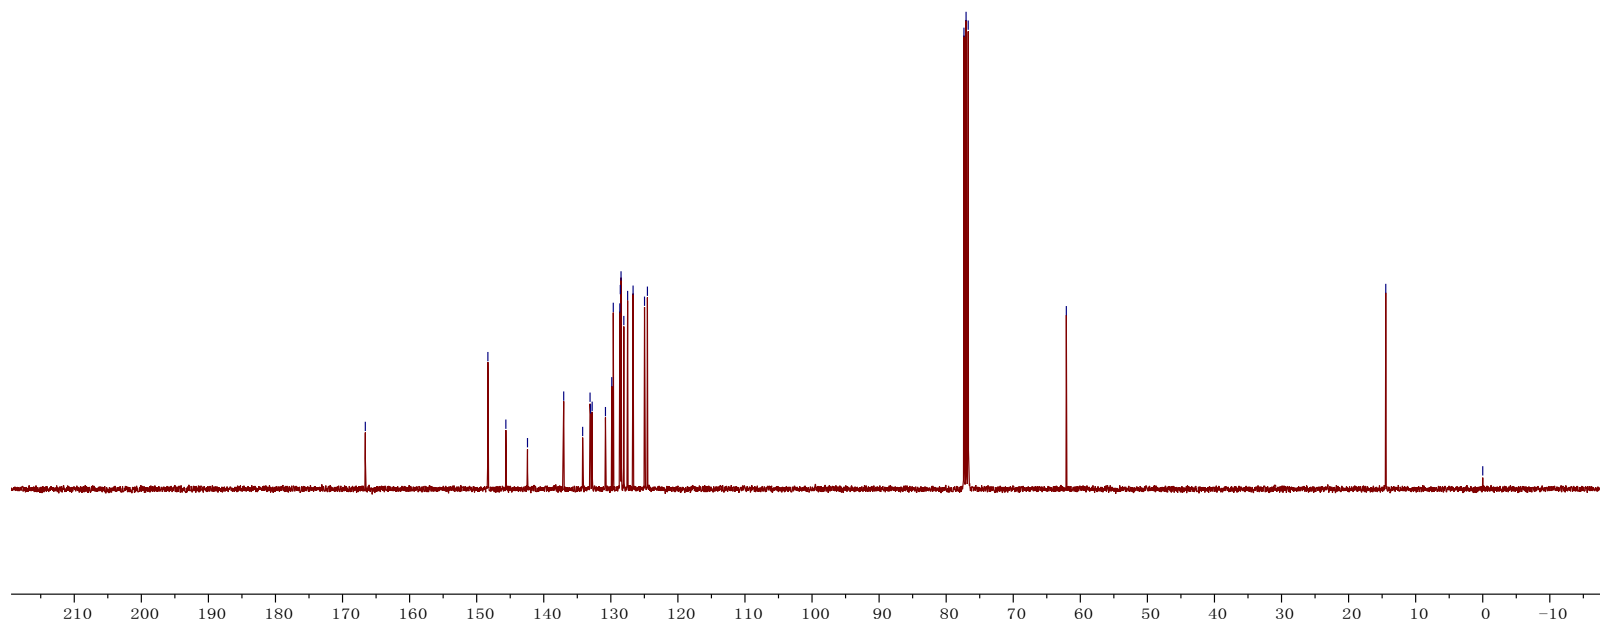

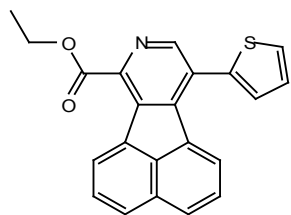

**3ah**

8.876  
8.859  
8.674  
7.962  
7.943  
7.744  
7.726  
7.706  
7.695  
7.677  
7.583  
7.571  
7.512  
7.494  
7.476  
7.392  
7.385  
7.284  
7.274  
7.260

4.686  
4.668  
4.650  
4.633

1.582  
1.564  
1.546

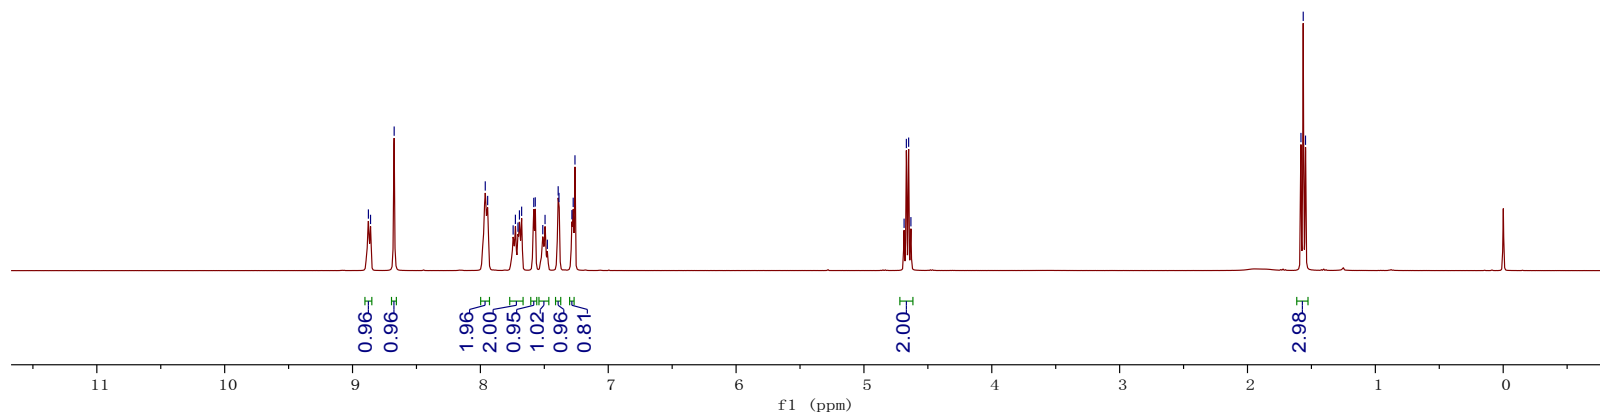



**3ah**

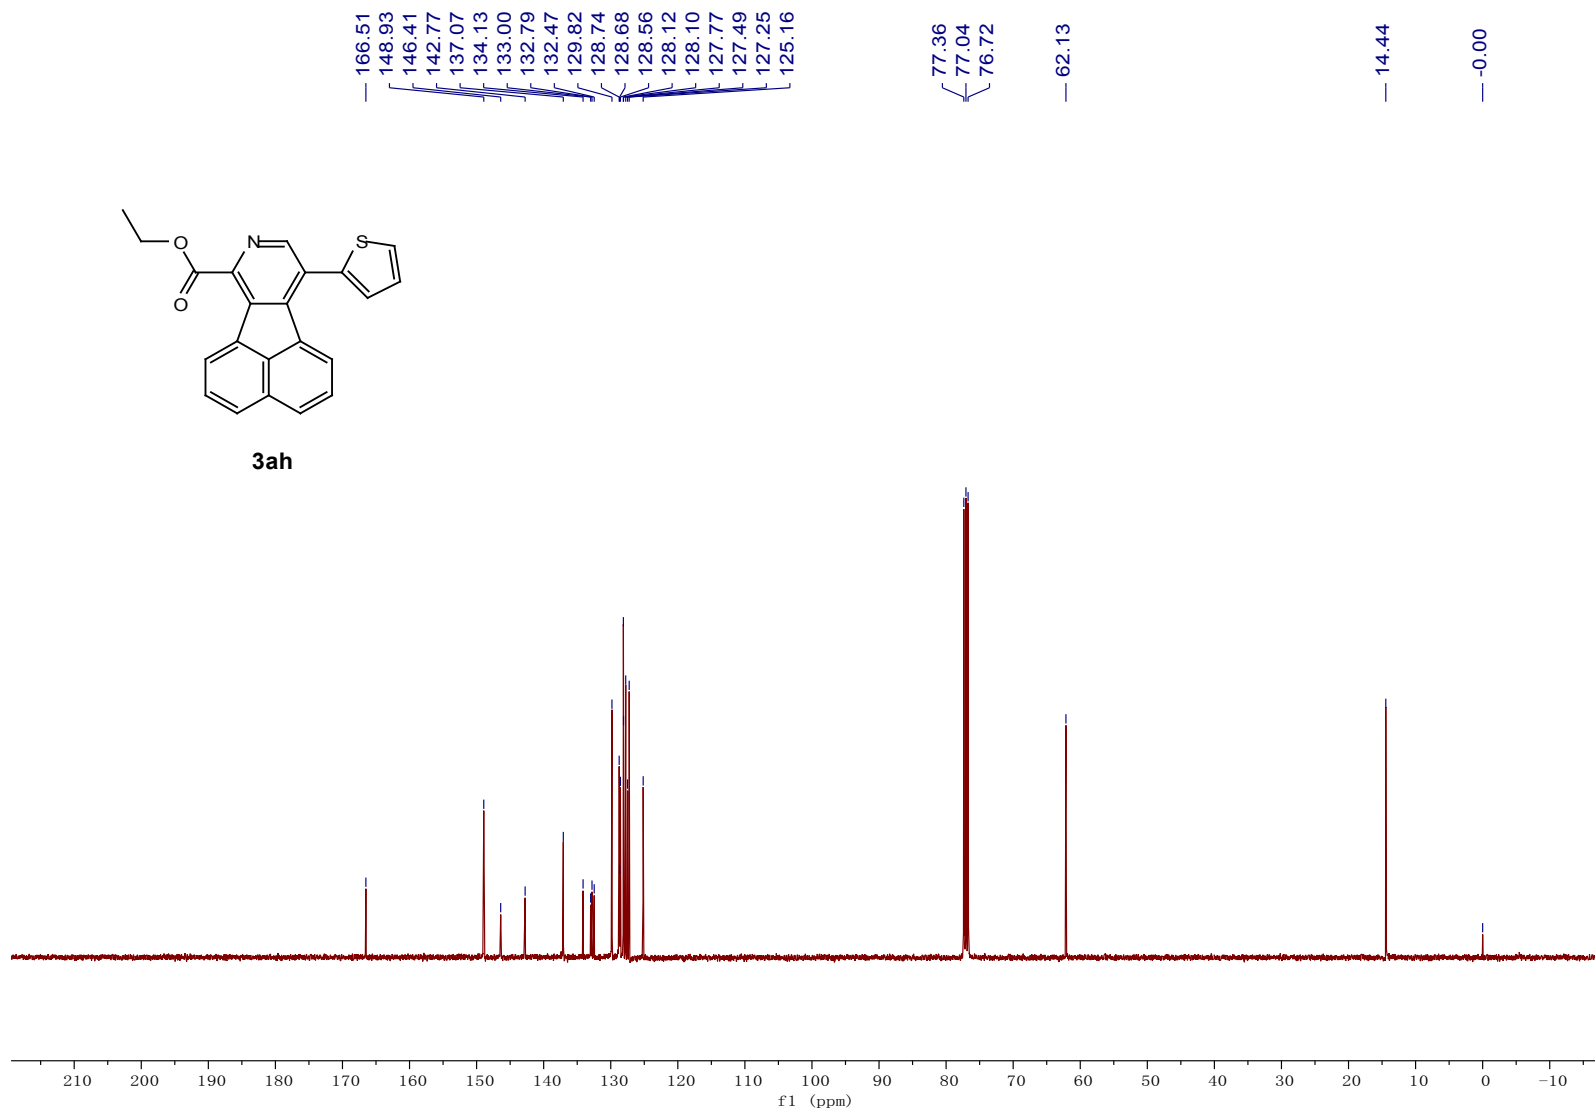

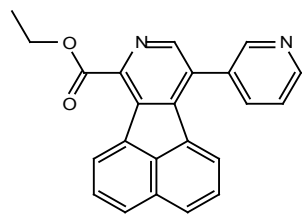

3ai

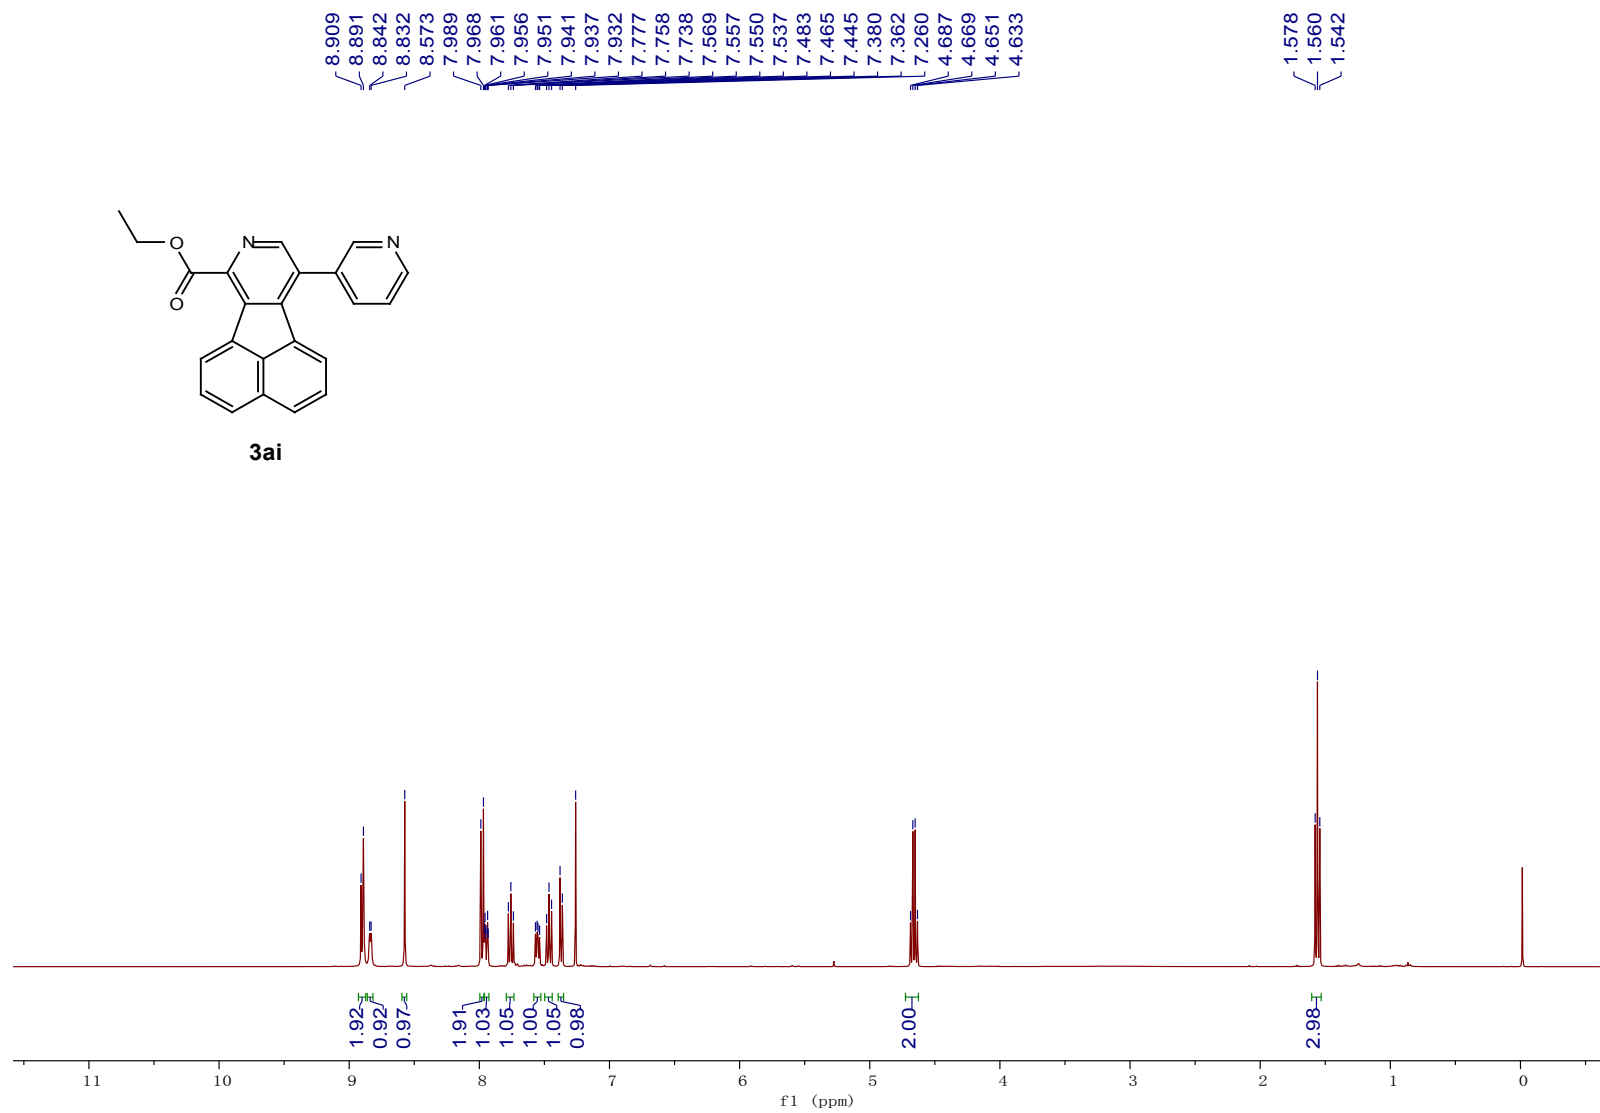





**3ai**

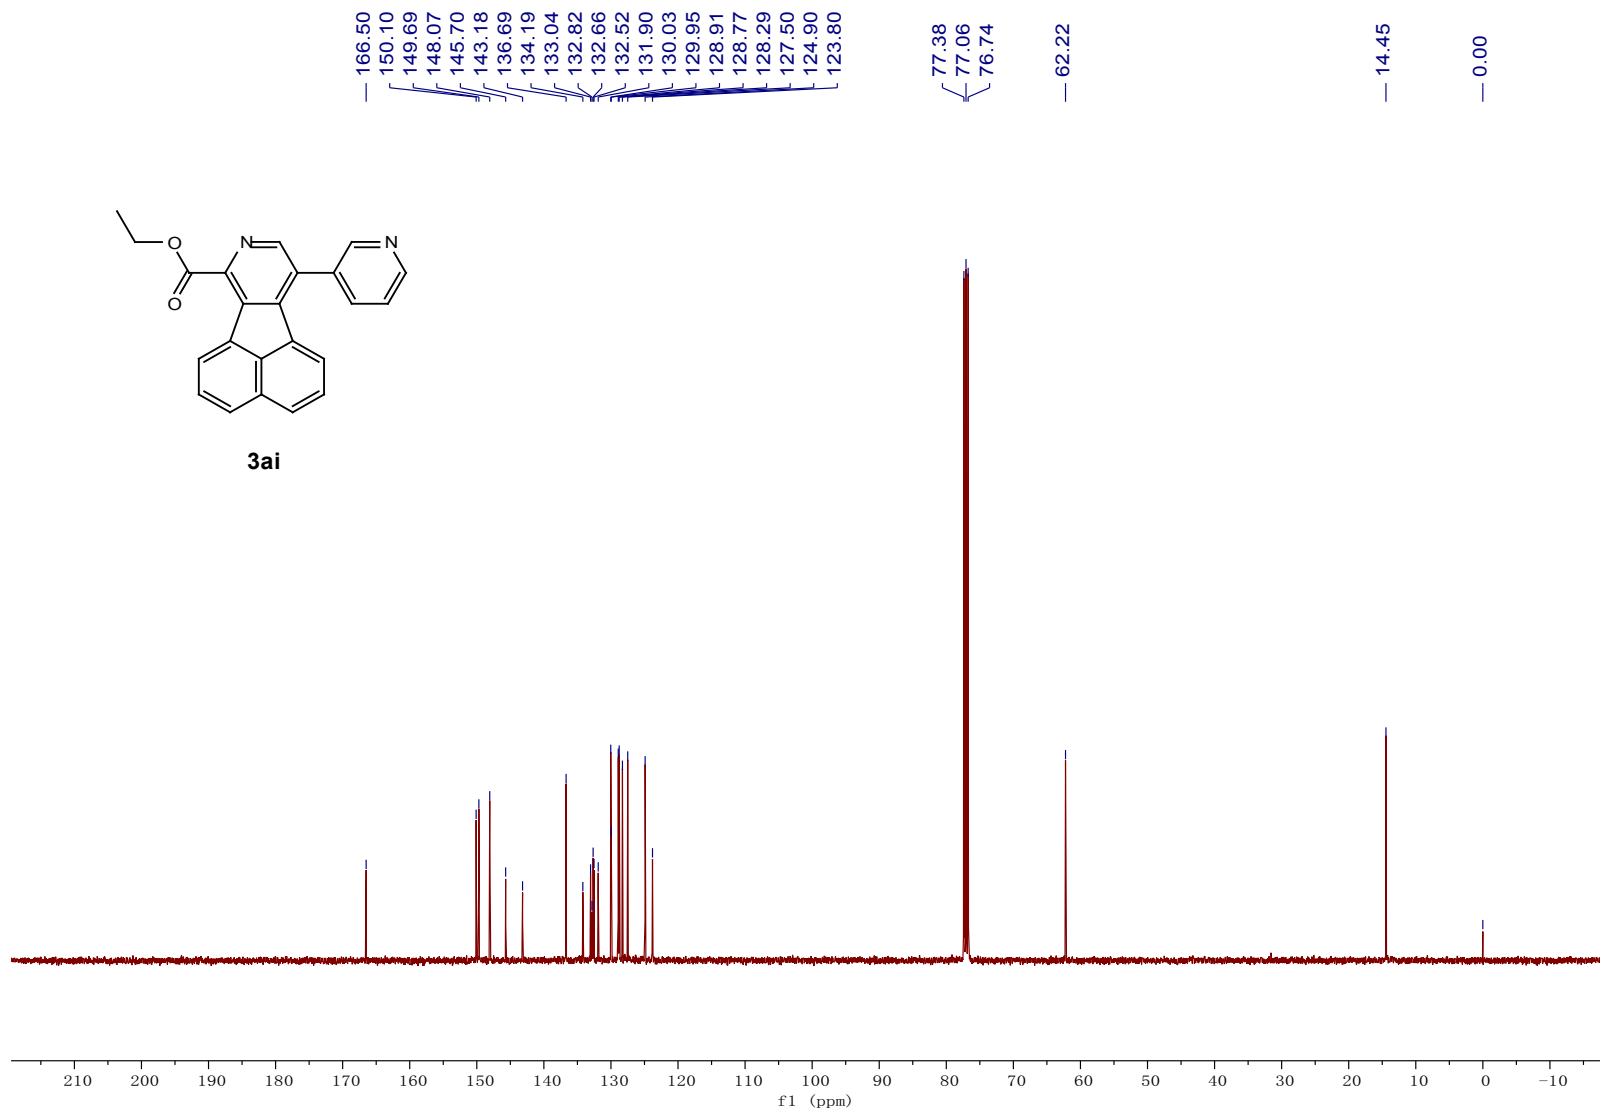

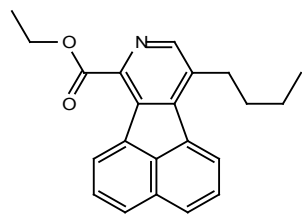

**3aj**

8.799  
8.781  
8.449  
7.956  
7.939  
7.901  
7.880  
7.864  
7.844  
7.661  
7.643  
7.623  
7.609  
7.591  
7.571  
7.260

4.644  
4.626  
4.608  
4.590  
3.069  
3.051  
3.031  
1.785  
1.767  
1.747  
1.729  
1.708  
1.560  
1.542  
1.524  
1.504  
1.485  
1.466  
1.448  
1.429  
0.978  
0.960  
0.941

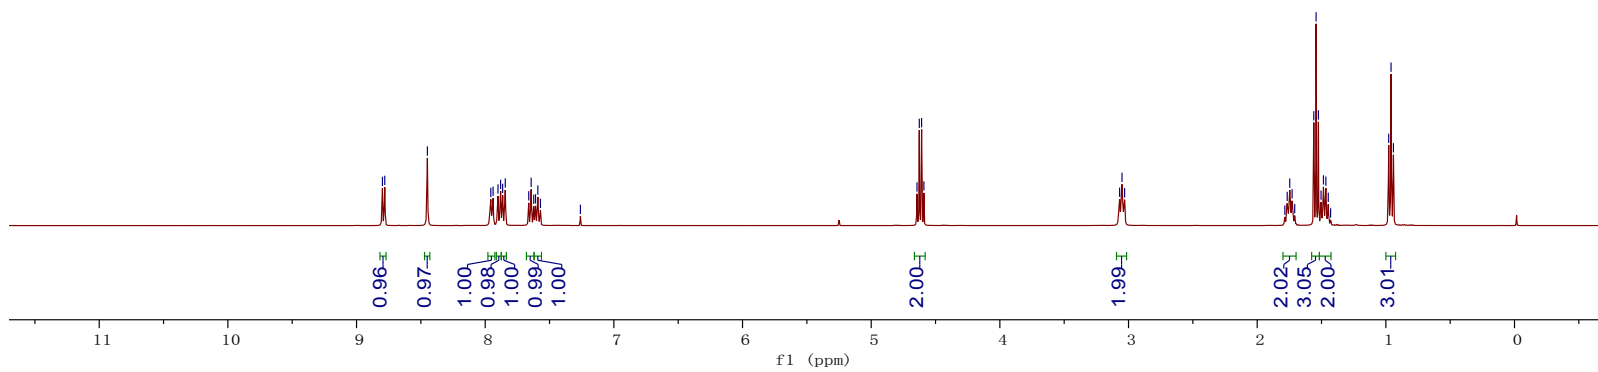



3aj

166.68  
148.70  
145.23  
141.38  
136.18  
134.16  
133.50  
133.18  
132.78  
129.74  
129.03  
128.47  
128.32  
127.78  
127.53  
124.86

77.43  
77.11  
76.79

61.88

31.13  
31.11

22.78

14.48  
13.92

-0.00

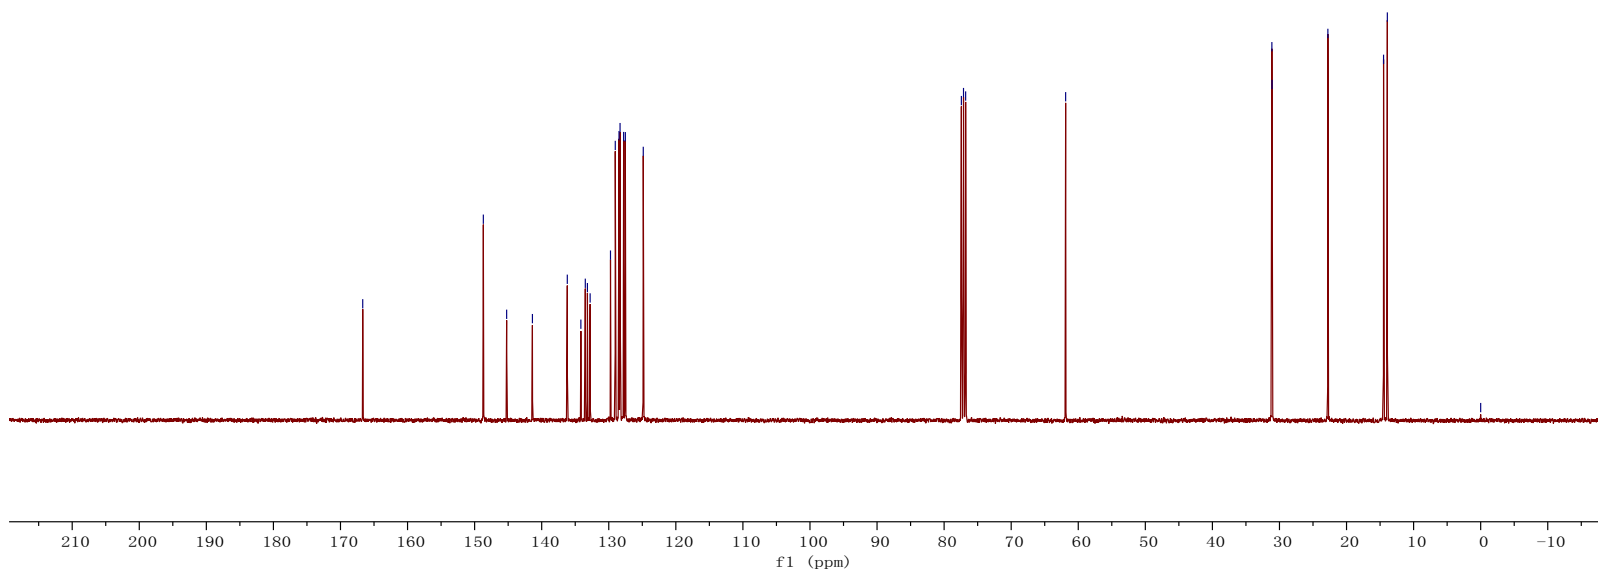

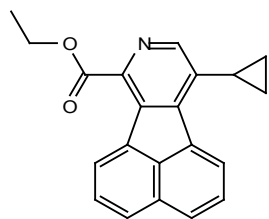

**3ak**

8.864  
8.845  
8.505  
8.369  
8.352  
7.999  
7.978  
7.946  
7.926  
7.722  
7.704  
7.685  
7.668  
7.260

4.645  
4.627  
4.609  
4.591

2.422  
2.408  
2.401  
2.395  
2.387  
2.380  
2.374  
2.366  
2.352  
1.556  
1.538  
1.520  
1.248  
1.236  
1.232  
1.221  
1.215  
1.211  
1.200  
0.950  
0.936  
0.922  
0.910

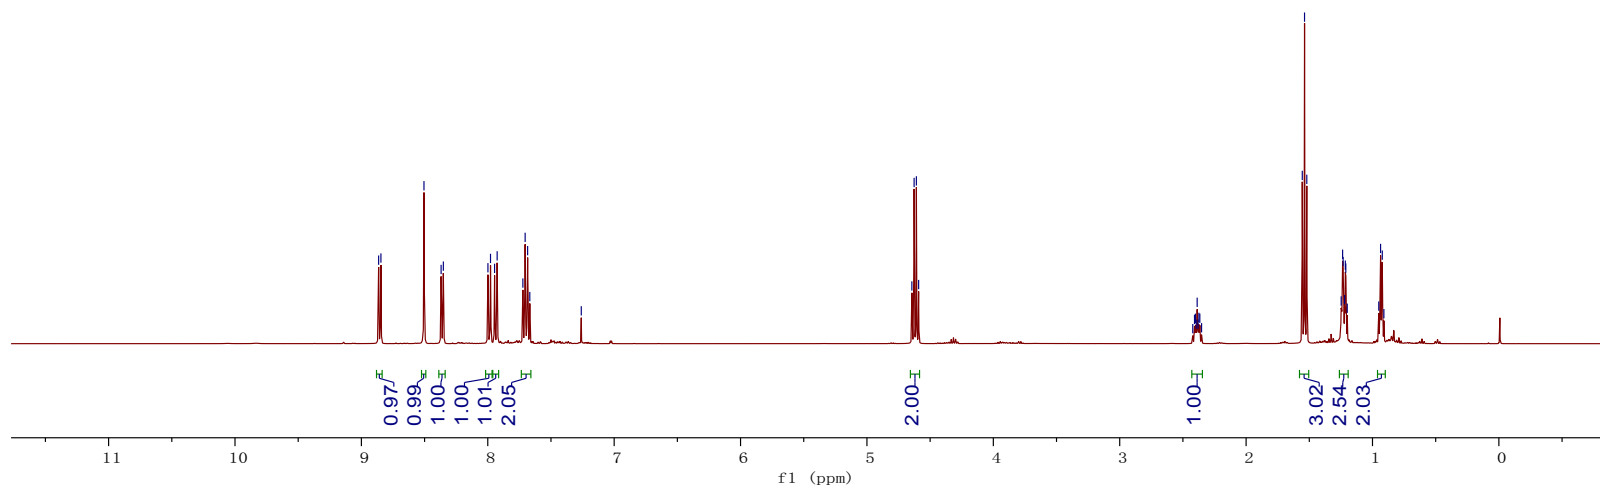

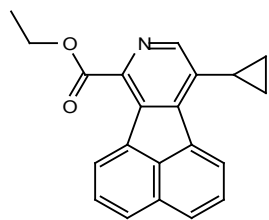

**3ak**

166.58  
147.49  
146.88  
141.30  
135.95  
133.75  
133.68  
133.08  
132.87  
129.76  
129.27  
128.55  
128.46  
128.05  
127.63  
125.85

77.41  
77.10  
76.78

61.98

14.48  
12.35  
6.72

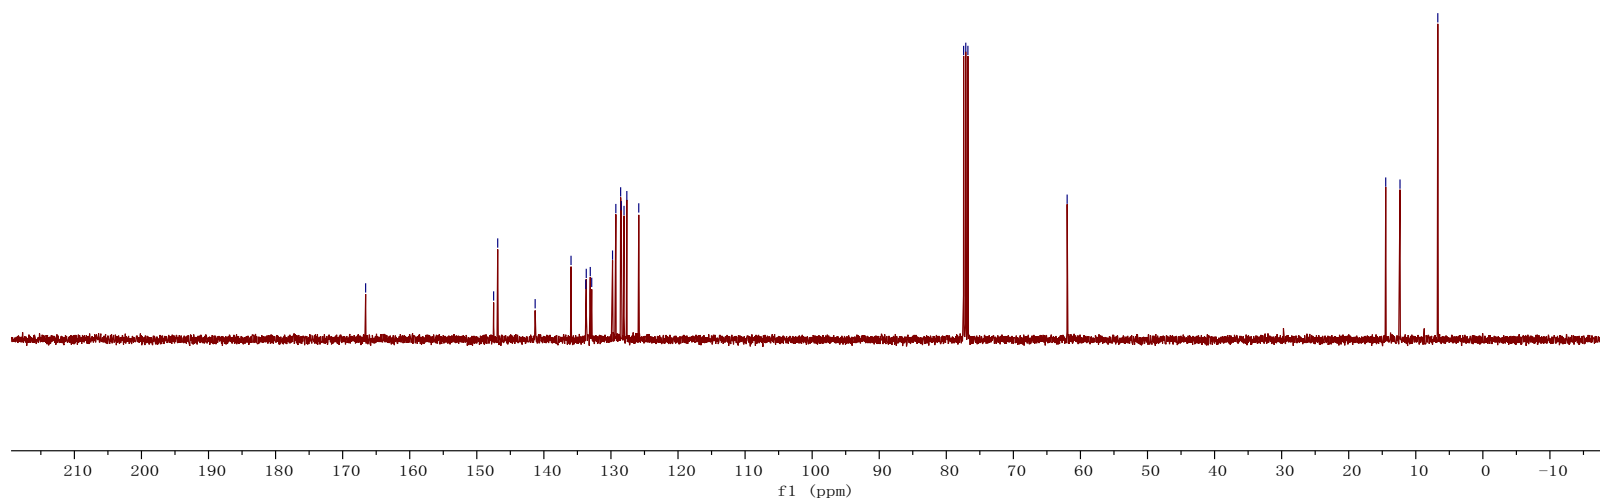

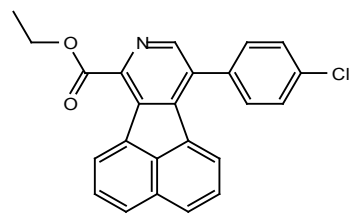

3al

8.925  
8.907  
8.573  
7.998  
7.978  
7.785  
7.766  
7.746  
7.593  
7.572  
7.561  
7.540  
7.511  
7.493  
7.466  
7.448  
7.260

4.695  
4.677  
4.659  
4.642

1.589  
1.571  
1.553

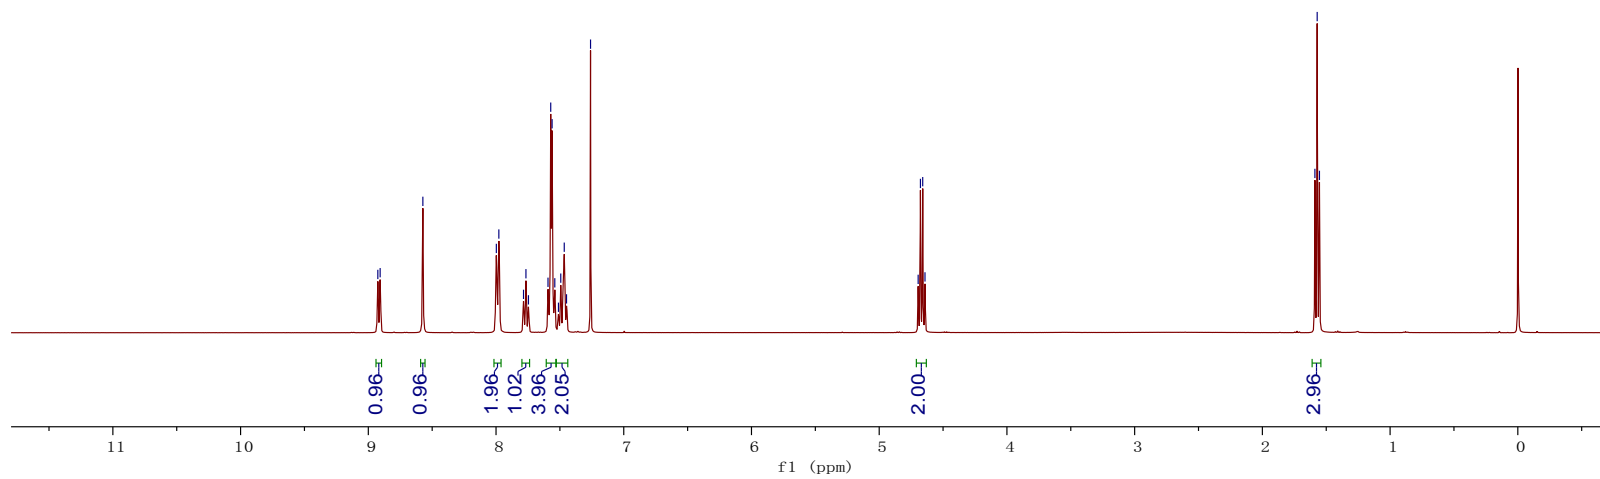

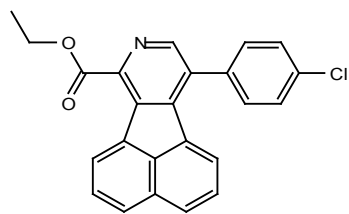

**3al**

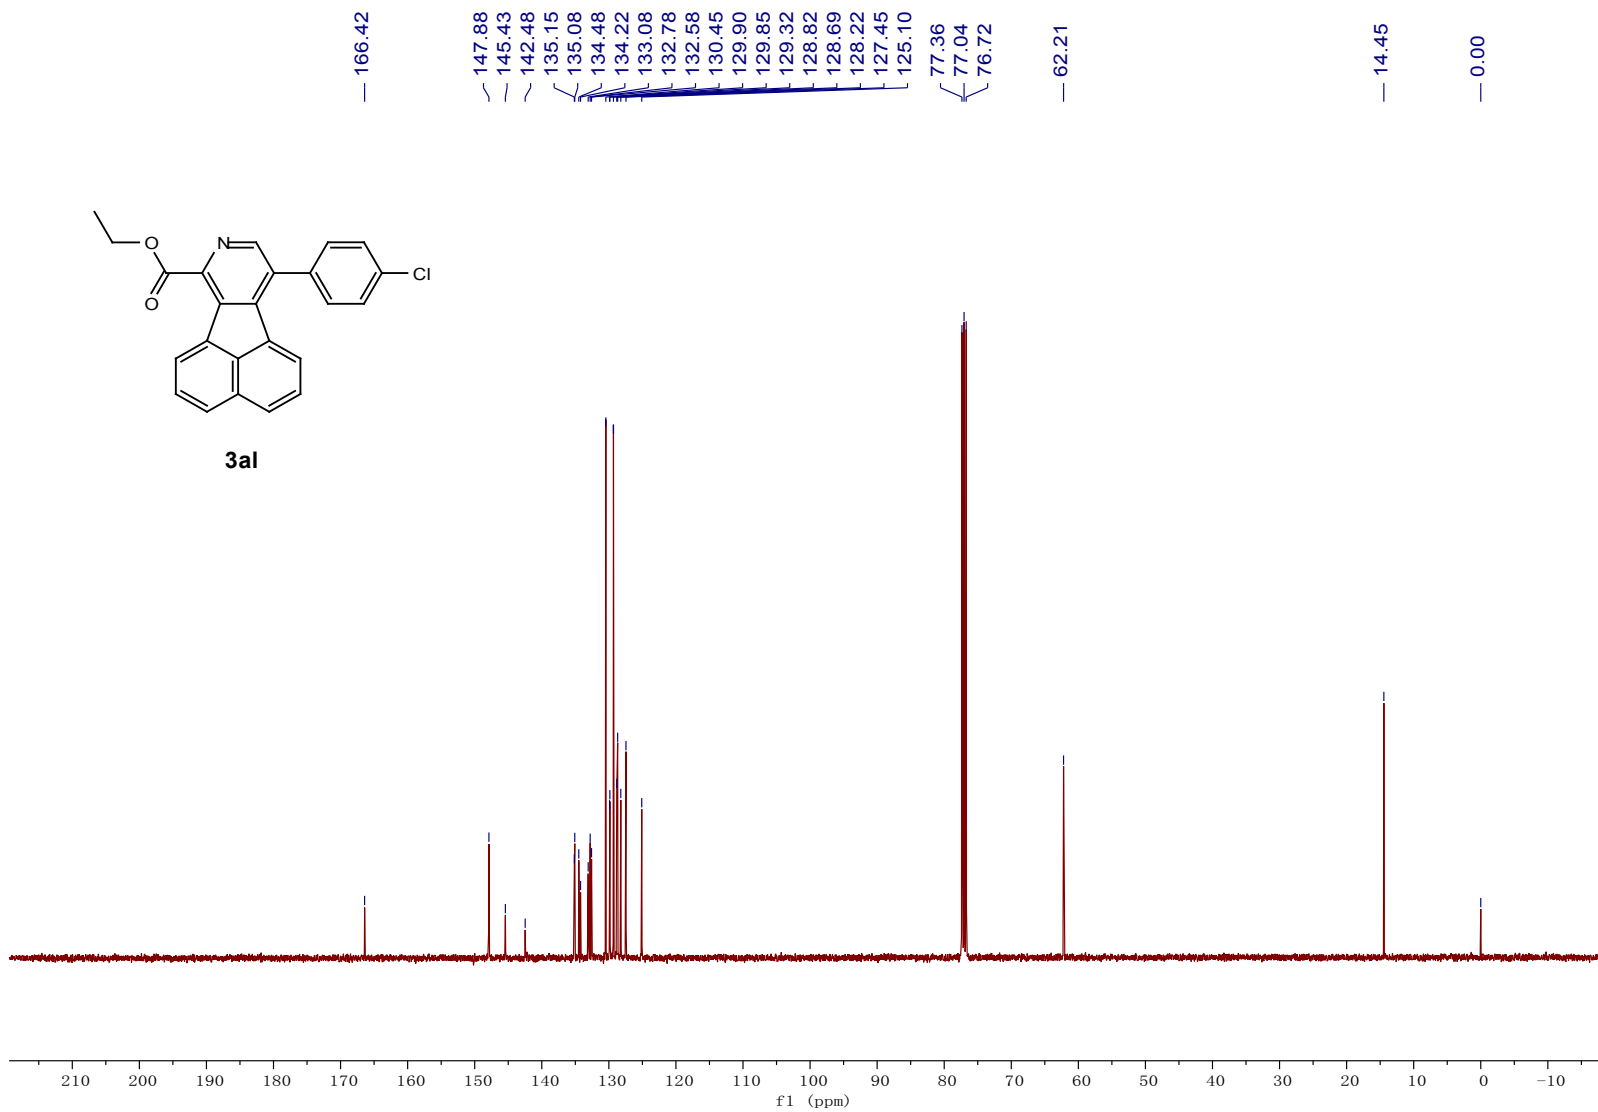

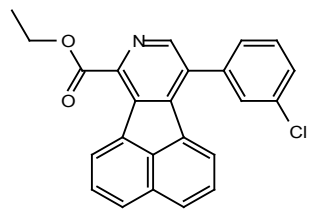

**3am**

8.932  
8.914  
8.591  
8.009  
7.988  
7.793  
7.774  
7.754  
7.612  
7.580  
7.560  
7.555  
7.537  
7.520  
7.505  
7.484  
7.449  
7.432  
7.260

4.701  
4.684  
4.666  
4.648

1.594  
1.576  
1.558

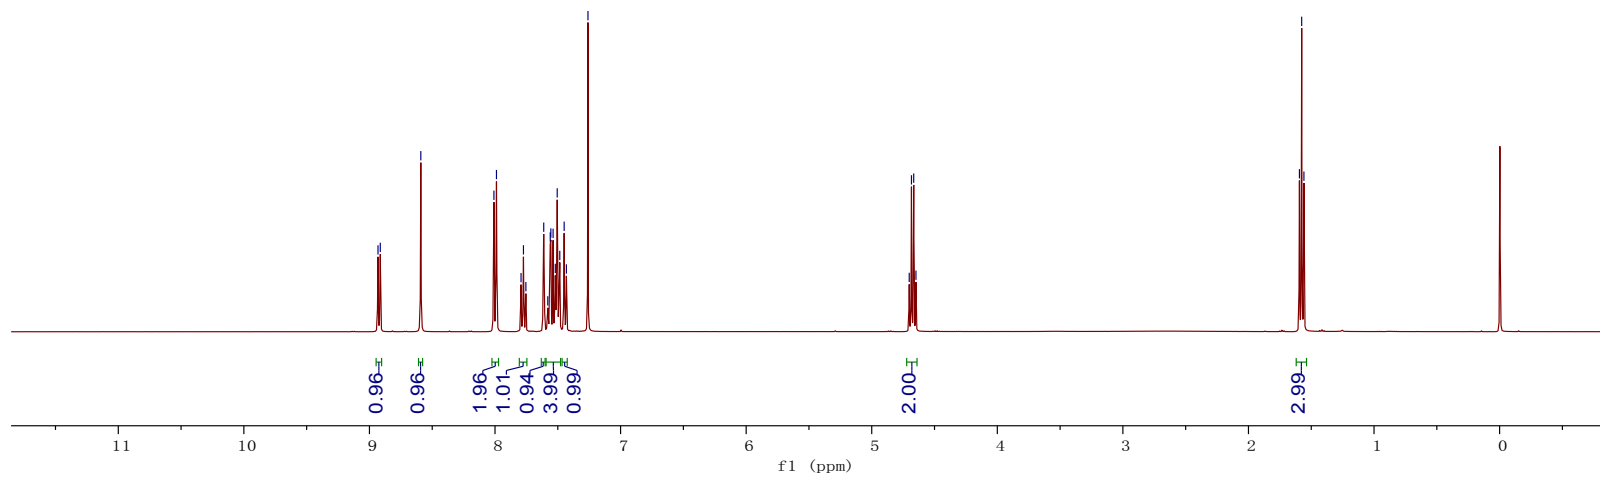



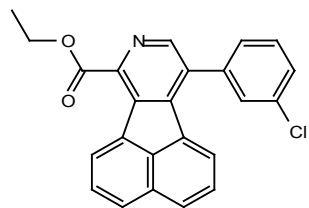

**3am**

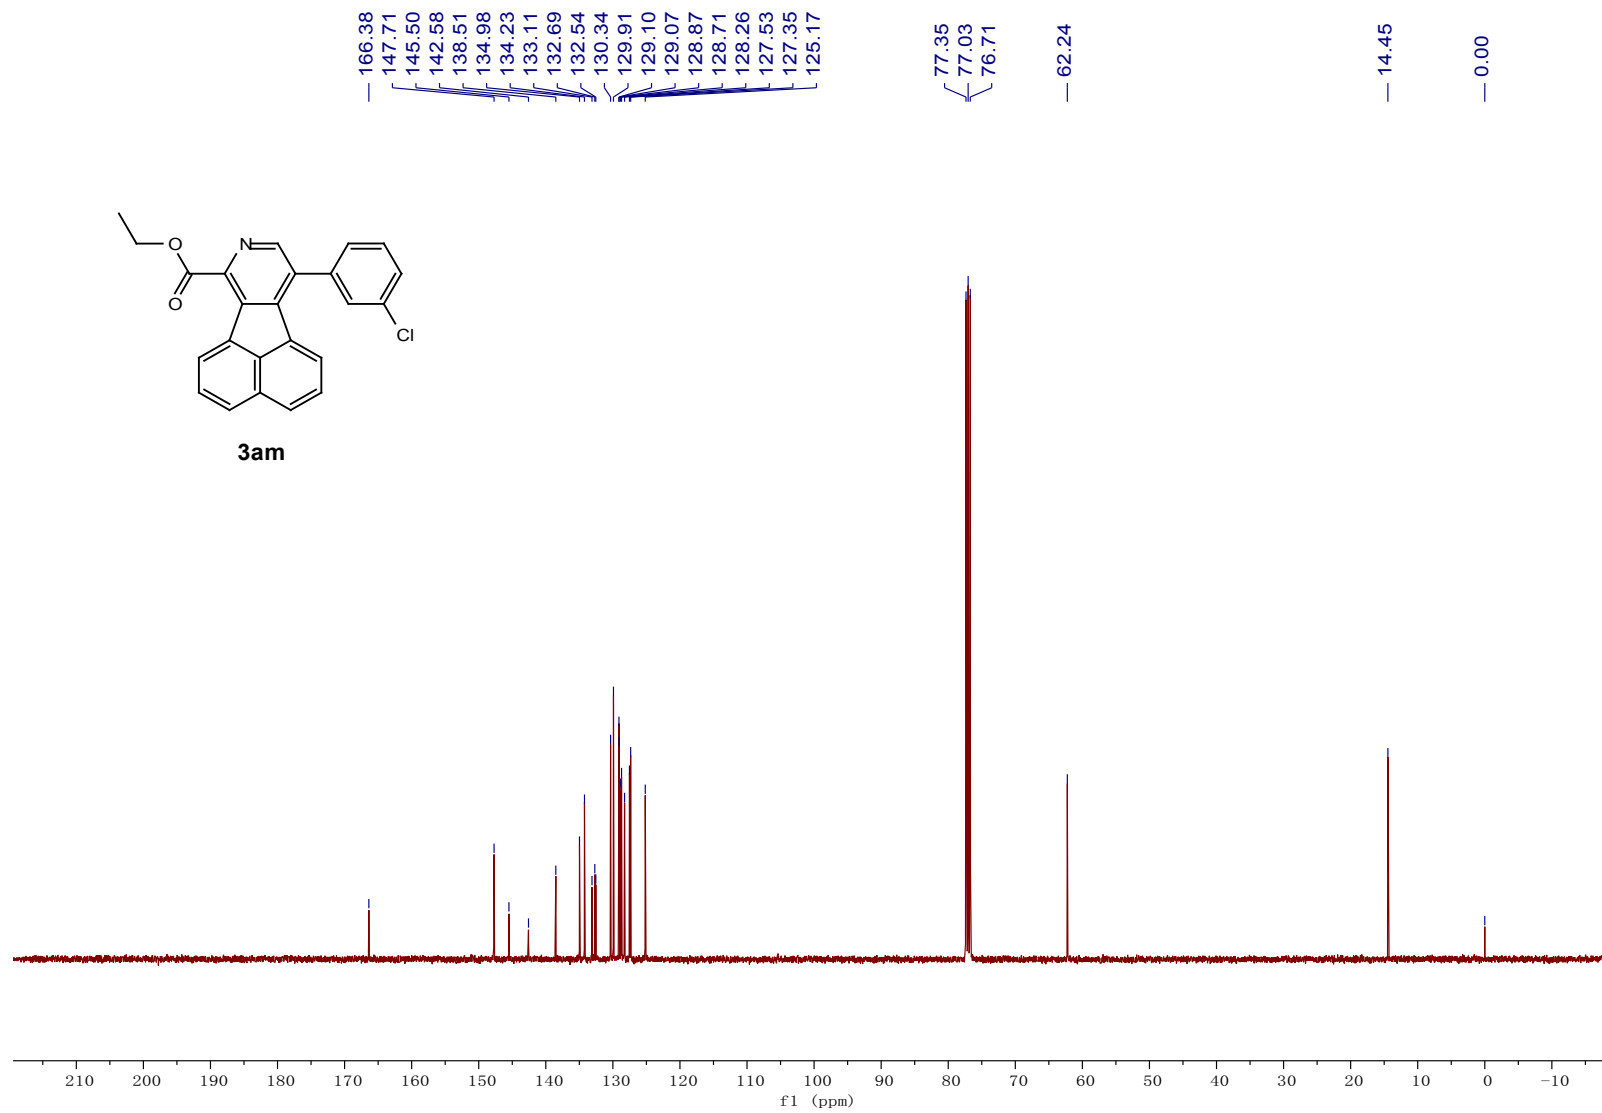

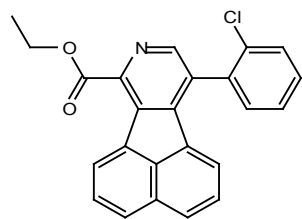

3an

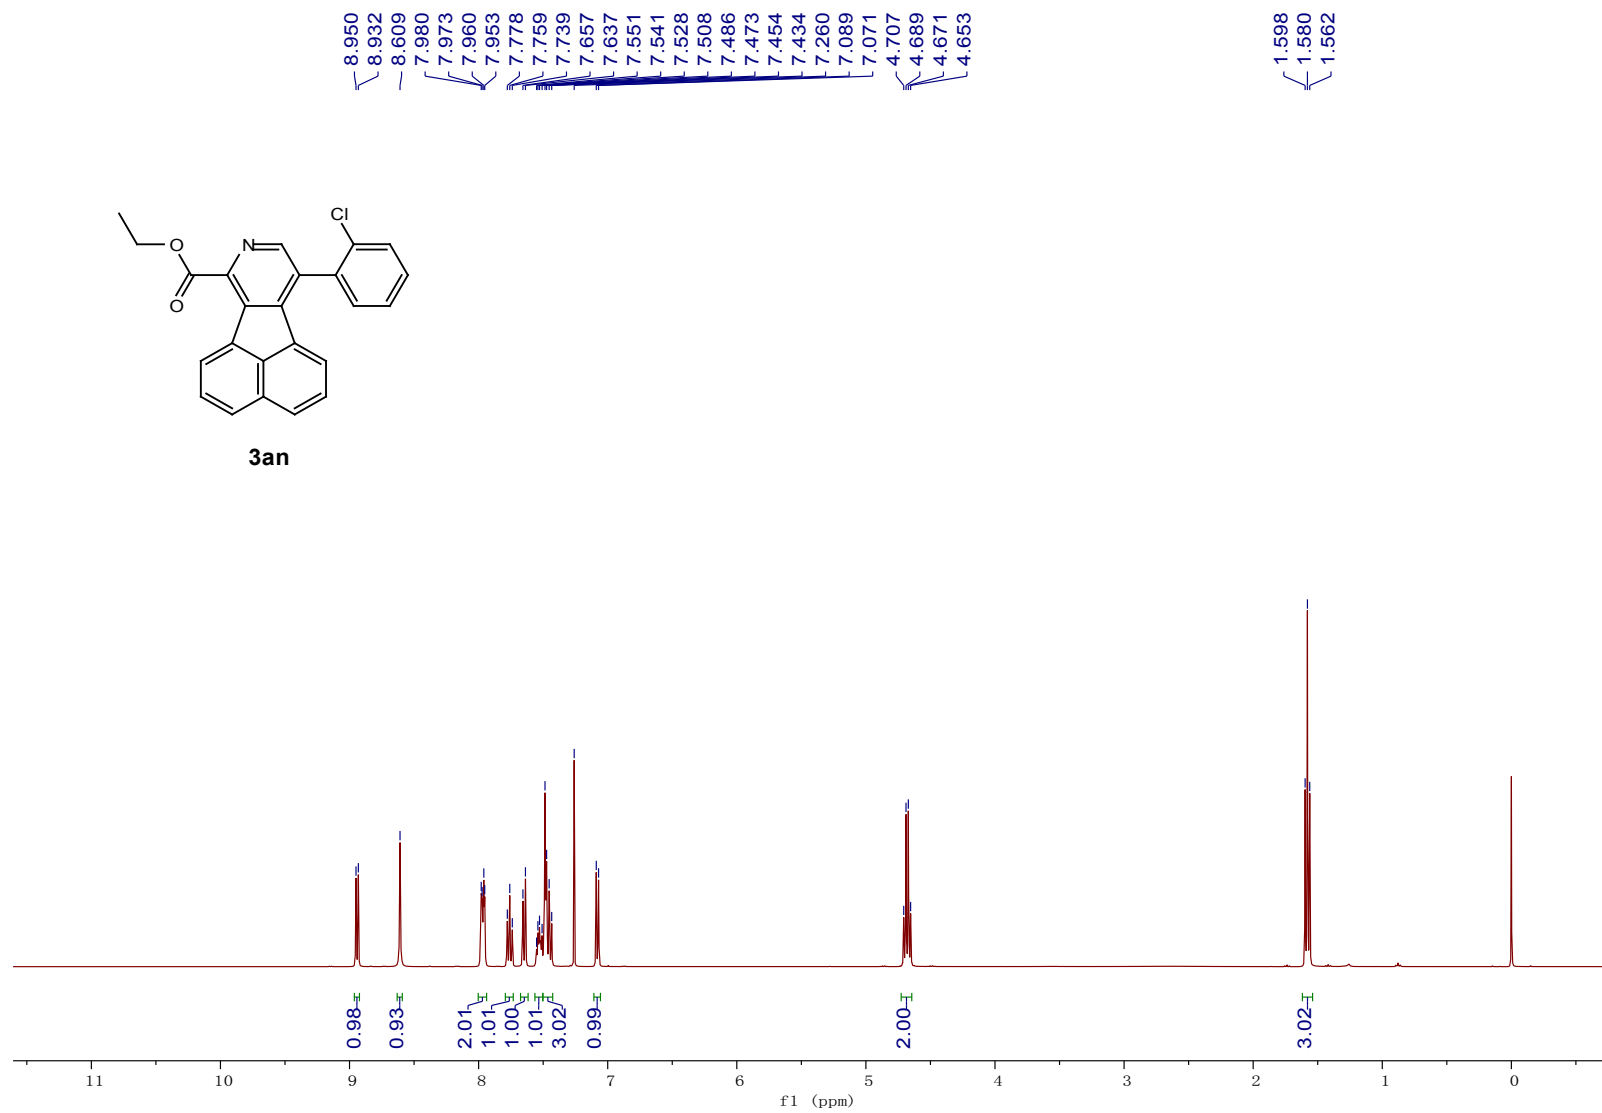



3an

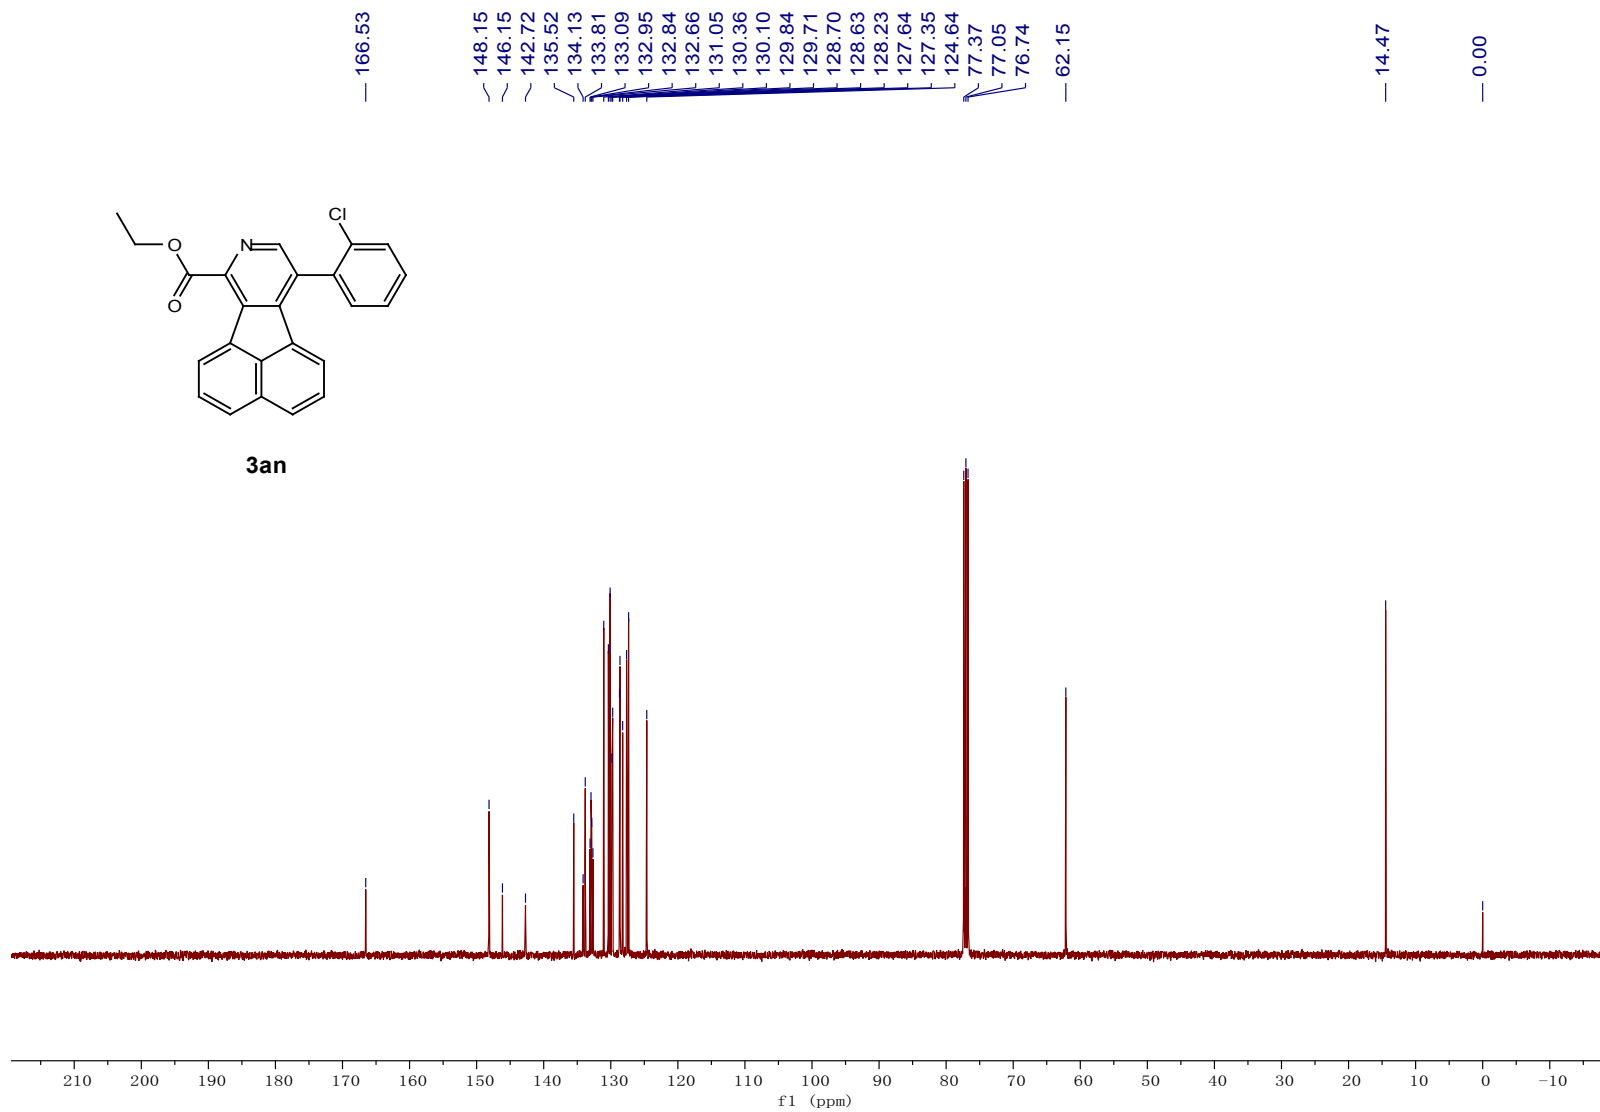

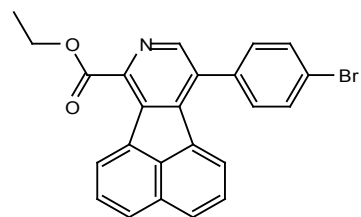

**3ao**

8.904  
8.886  
8.556  
7.971  
7.951  
7.761  
7.743  
7.732  
7.723  
7.712  
7.485  
7.472  
7.464  
7.453  
7.433  
7.260

4.689  
4.671  
4.653  
4.635

1.584  
1.566  
1.549

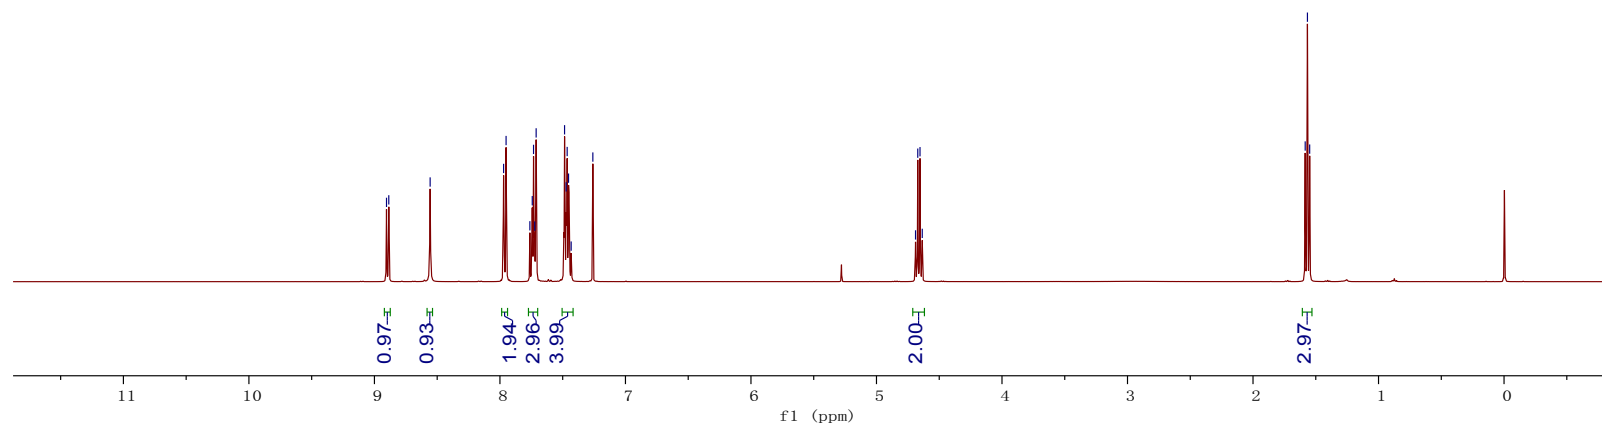



**3ao**

166.44  
147.84  
145.28  
142.54  
135.65  
134.45  
134.20  
133.05  
132.77  
132.58  
132.25  
130.73  
129.88  
129.82  
128.80  
128.67  
128.19  
127.44  
125.06  
123.23

77.36  
77.05  
76.73

62.18

14.45

0.00

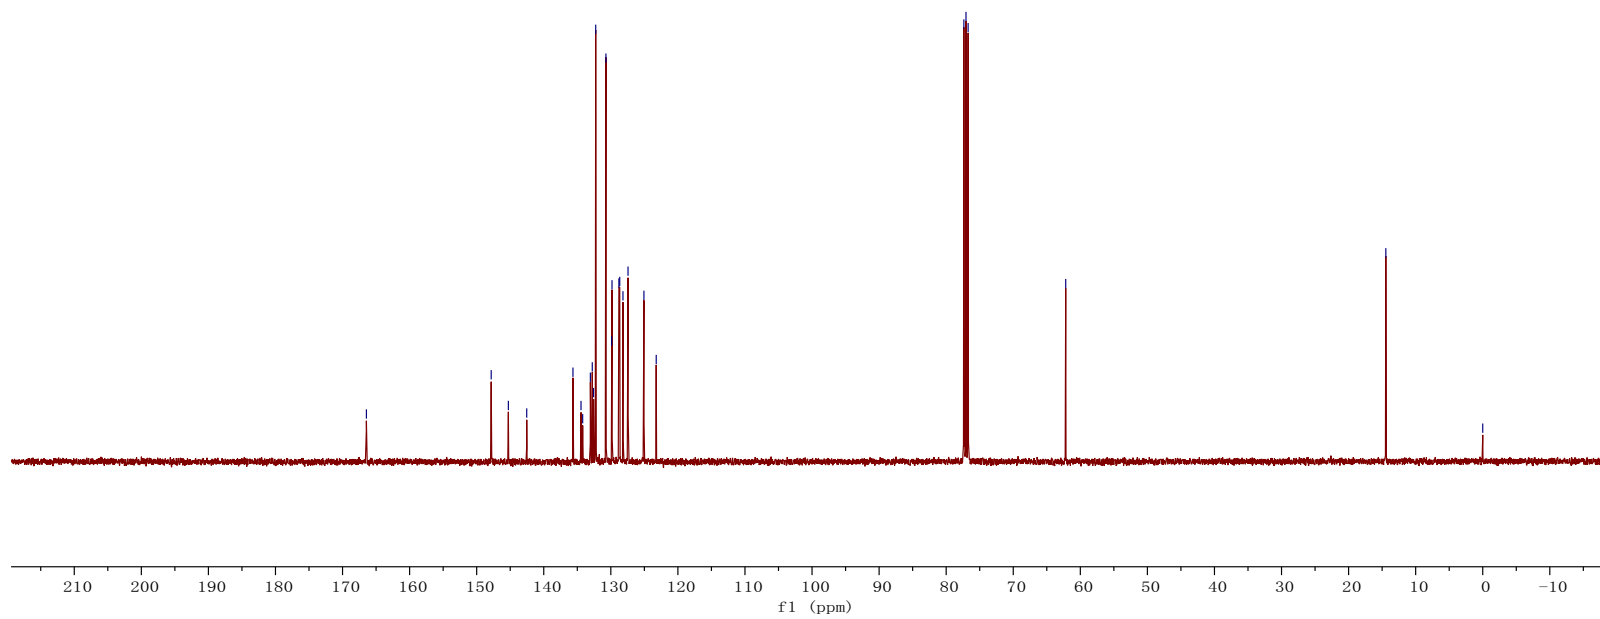

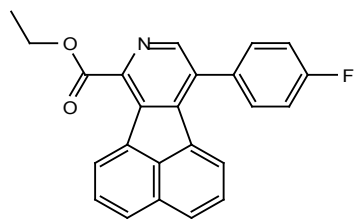

3ap

8.906  
8.888  
8.570  
7.966  
7.959  
7.945  
7.940  
7.759  
7.740  
7.721  
7.585  
7.580  
7.571  
7.563  
7.555  
7.550  
7.475  
7.456  
7.437  
7.409  
7.392  
7.304  
7.282  
7.260  
4.691  
4.673  
4.655  
4.637

1.586  
1.568  
1.550

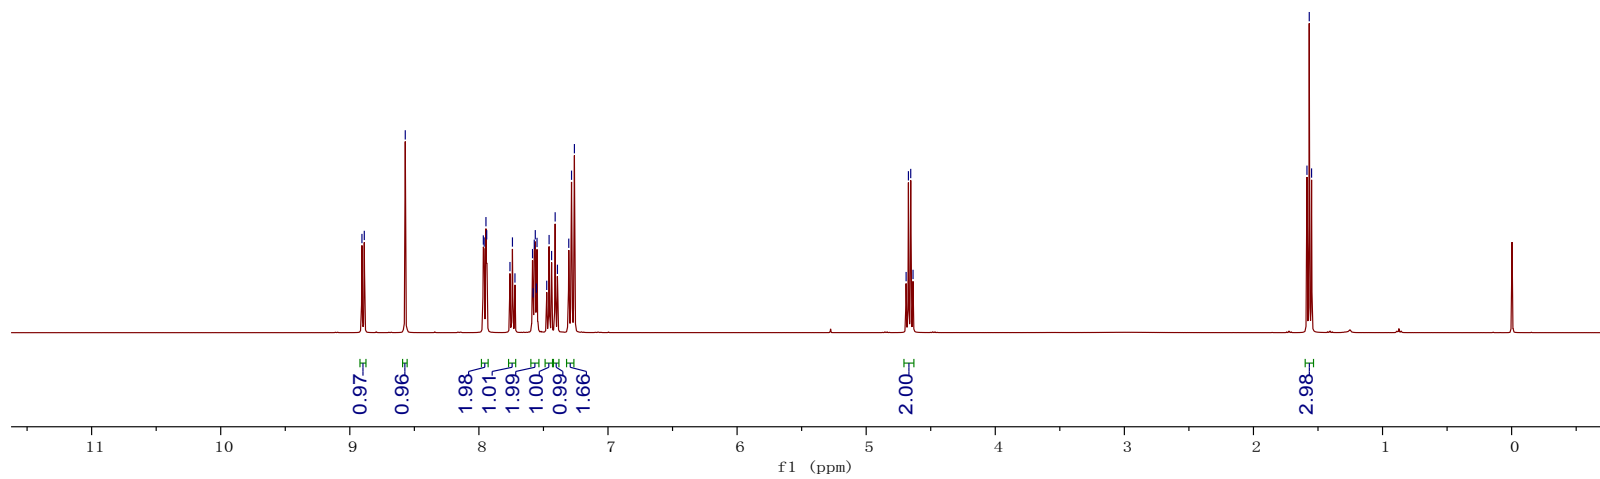

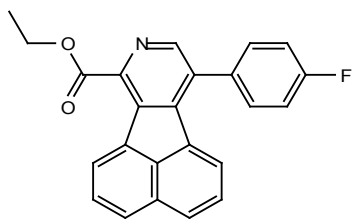

**3ap**

166.51  
164.39  
161.92

148.13  
145.48  
142.45  
134.69  
134.18  
133.07  
132.92  
132.72  
132.68  
130.91  
130.83  
129.89  
129.73  
128.75  
128.65  
128.15  
127.41  
124.99  
116.23  
116.02  
77.37  
77.06  
76.74

62.15

14.46

-0.00

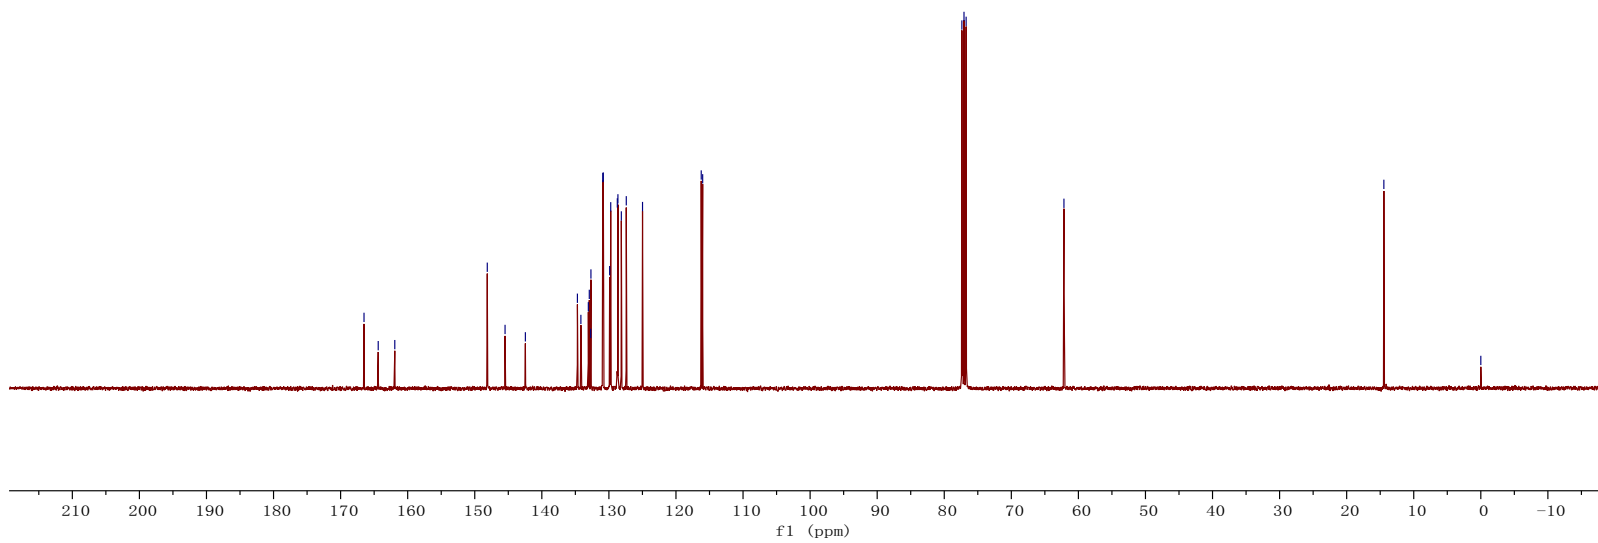

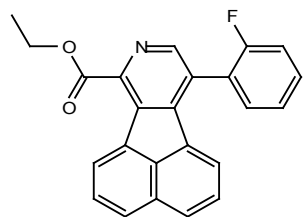

**3aq**

8.934  
8.915  
8.647  
7.995  
7.975  
7.782  
7.764  
7.744  
7.611  
7.606  
7.598  
7.592  
7.586  
7.577  
7.572  
7.567  
7.561  
7.557  
7.542  
7.538  
7.524  
7.519  
7.509  
7.491  
7.471  
7.400  
7.398  
7.381  
7.379  
7.363  
7.360  
7.348  
7.328  
7.307  
7.260

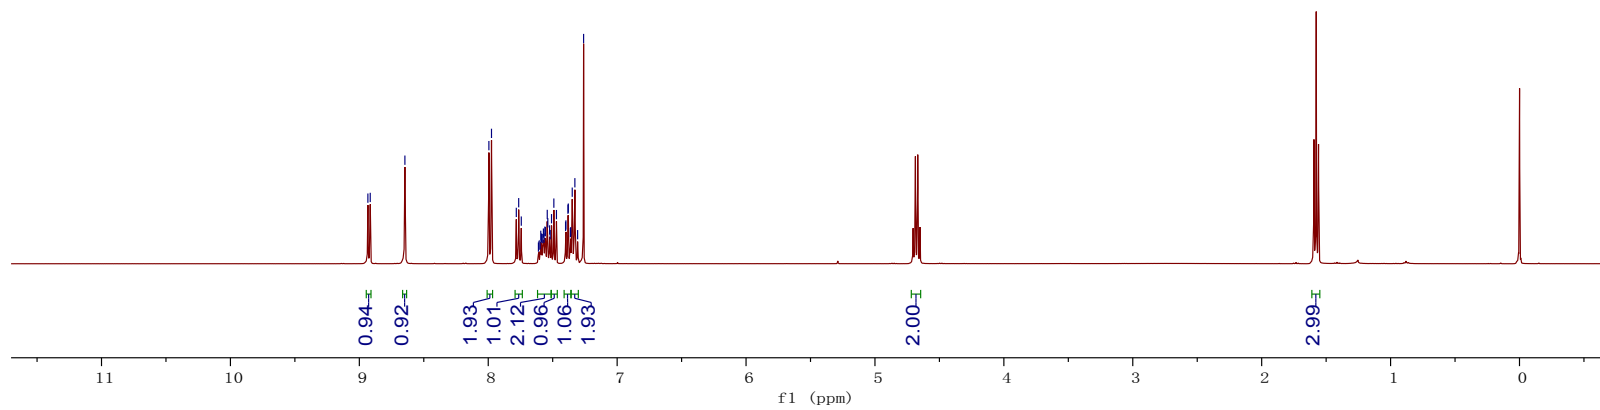



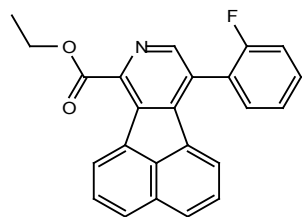

**3aq**

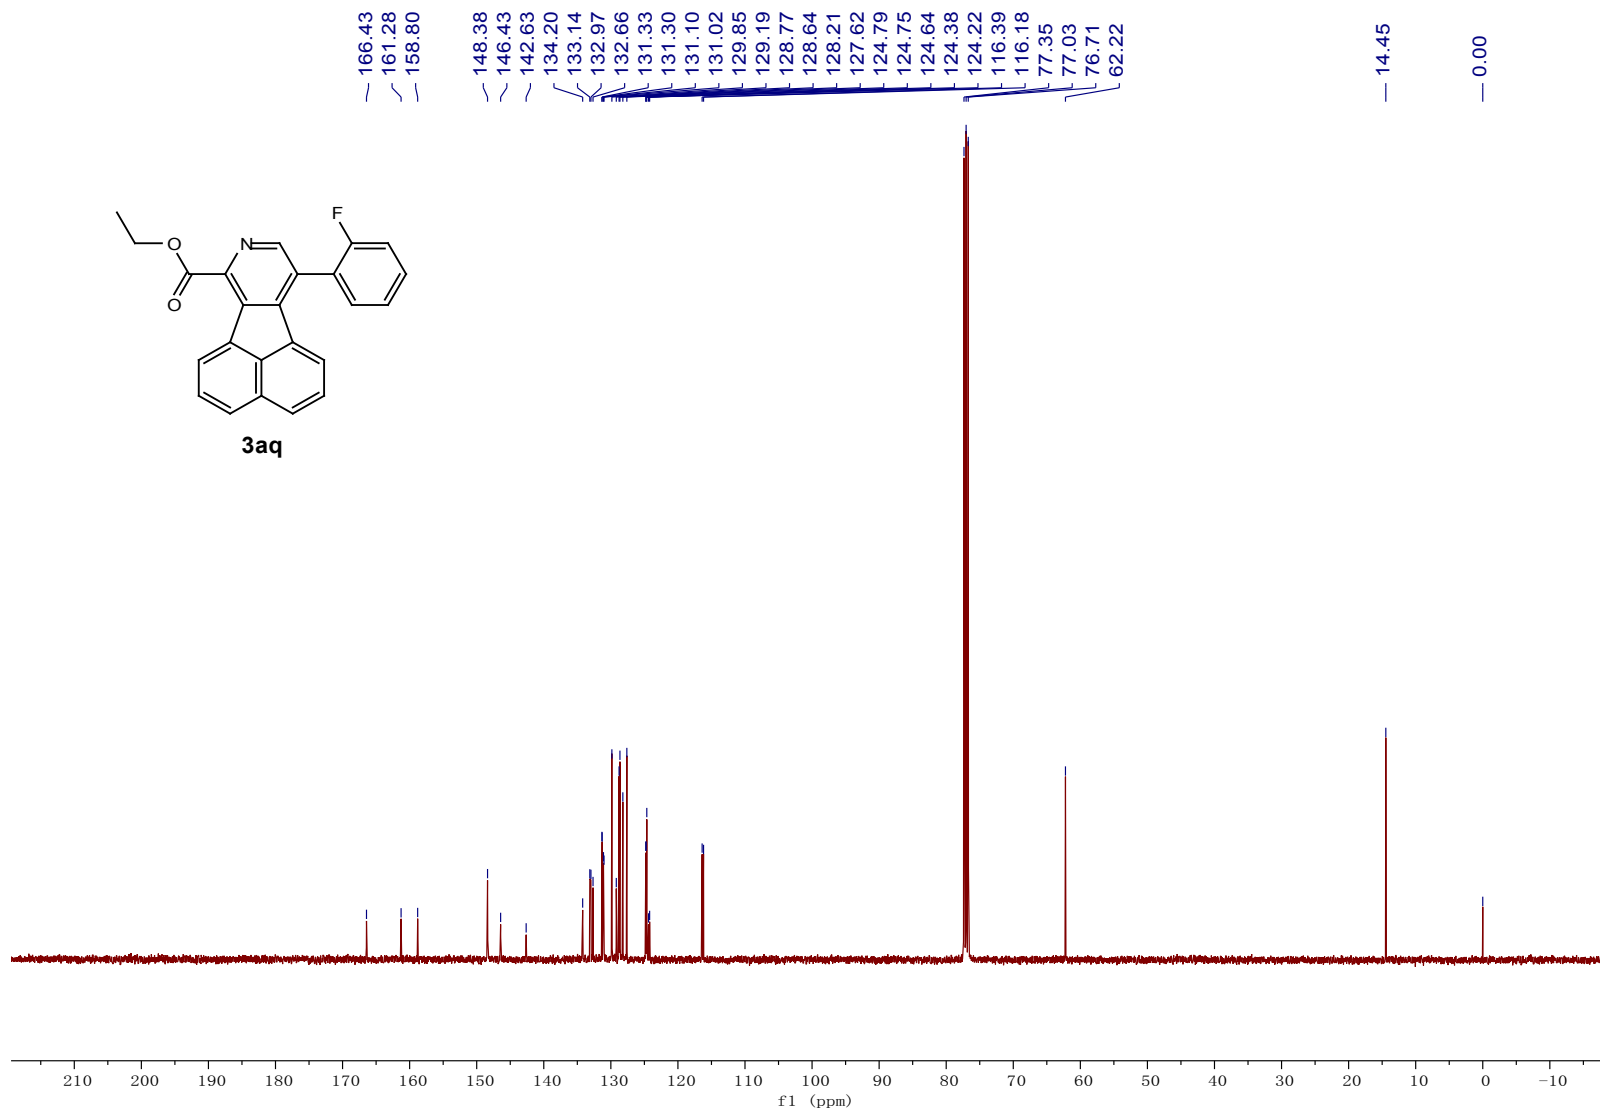

8.924  
8.906  
8.592  
7.999  
7.978  
7.785  
7.767  
7.747  
7.599  
7.585  
7.580  
7.565  
7.560  
7.545  
7.508  
7.490  
7.471  
7.460  
7.457  
7.442  
7.407  
7.388  
7.342  
7.336  
7.332  
7.319  
7.313  
7.309  
7.299  
7.286  
7.280  
7.260  
4.698  
4.680  
4.663  
4.645  
1.591  
1.573  
1.555

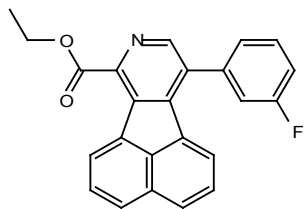

3ar

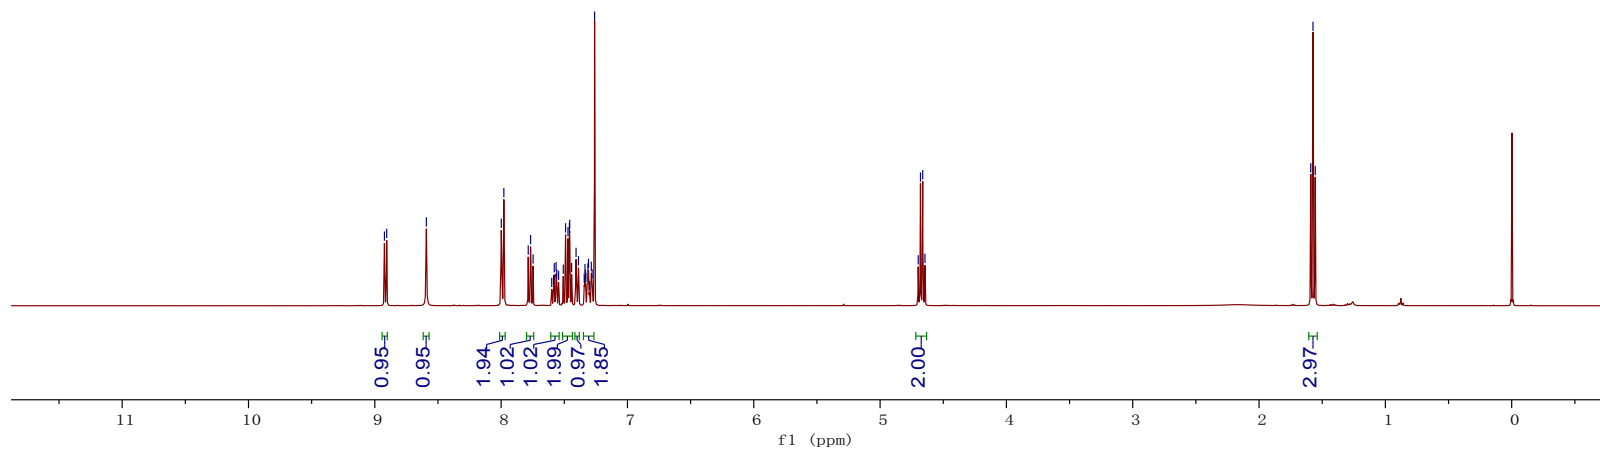

166.46  
164.22  
161.76  
147.80  
145.42  
142.62  
138.90  
138.83  
134.39  
134.23  
133.10  
132.72  
132.59  
130.78  
130.69  
129.91  
129.87  
128.85  
128.69  
128.21  
127.50  
125.16  
124.93  
124.90  
116.31  
116.09  
115.99  
115.79

77.35  
77.03  
76.71

62.22

14.45

0.00

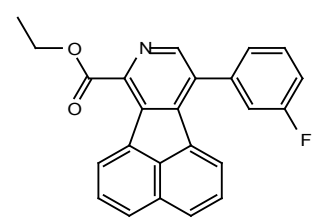

3ar

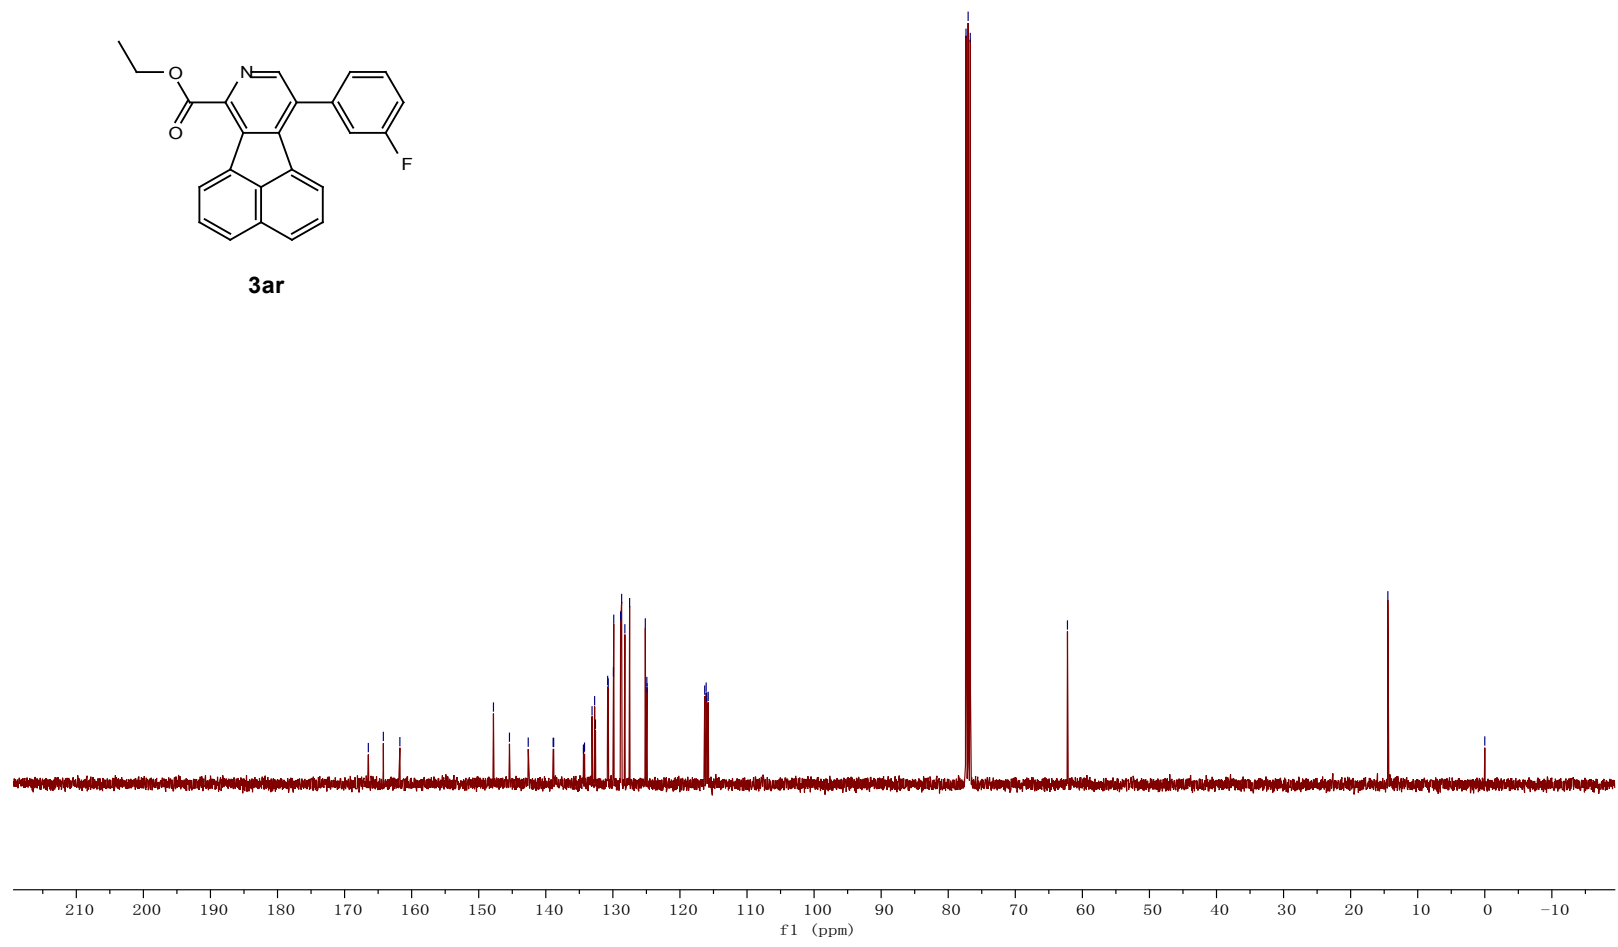

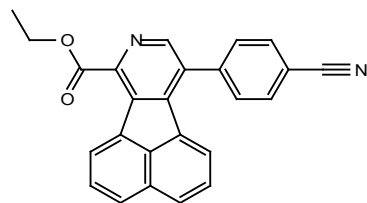

**3as**

8.925  
8.907  
8.557  
8.024  
8.004  
7.918  
7.898  
7.804  
7.785  
7.766  
7.747  
7.517  
7.497  
7.478  
7.366  
7.349  
7.260

4.697  
4.679  
4.661  
4.643

1.586  
1.568  
1.550

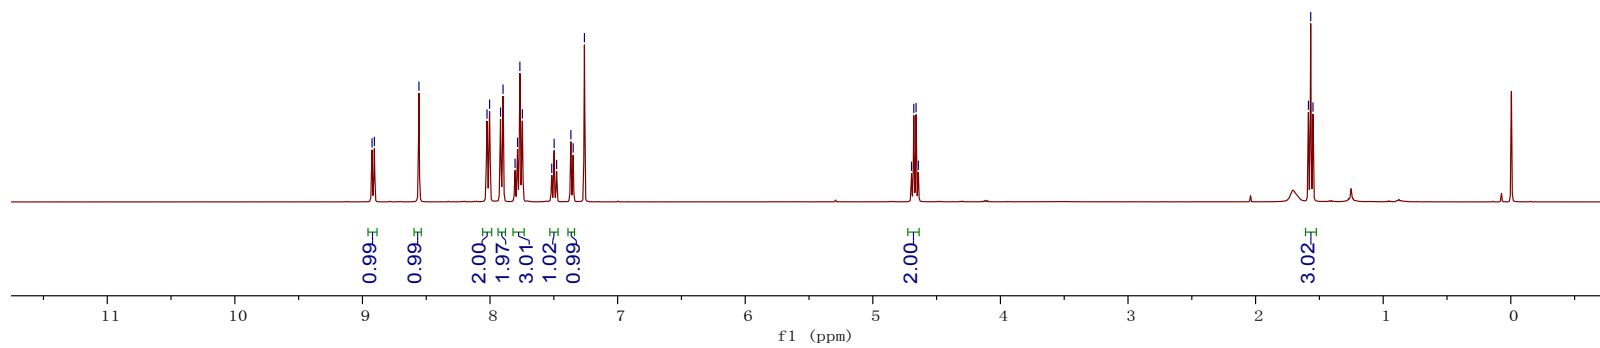

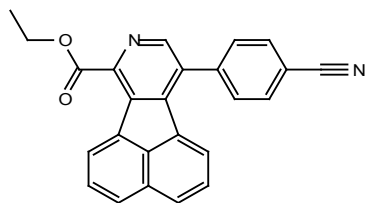

**3as**

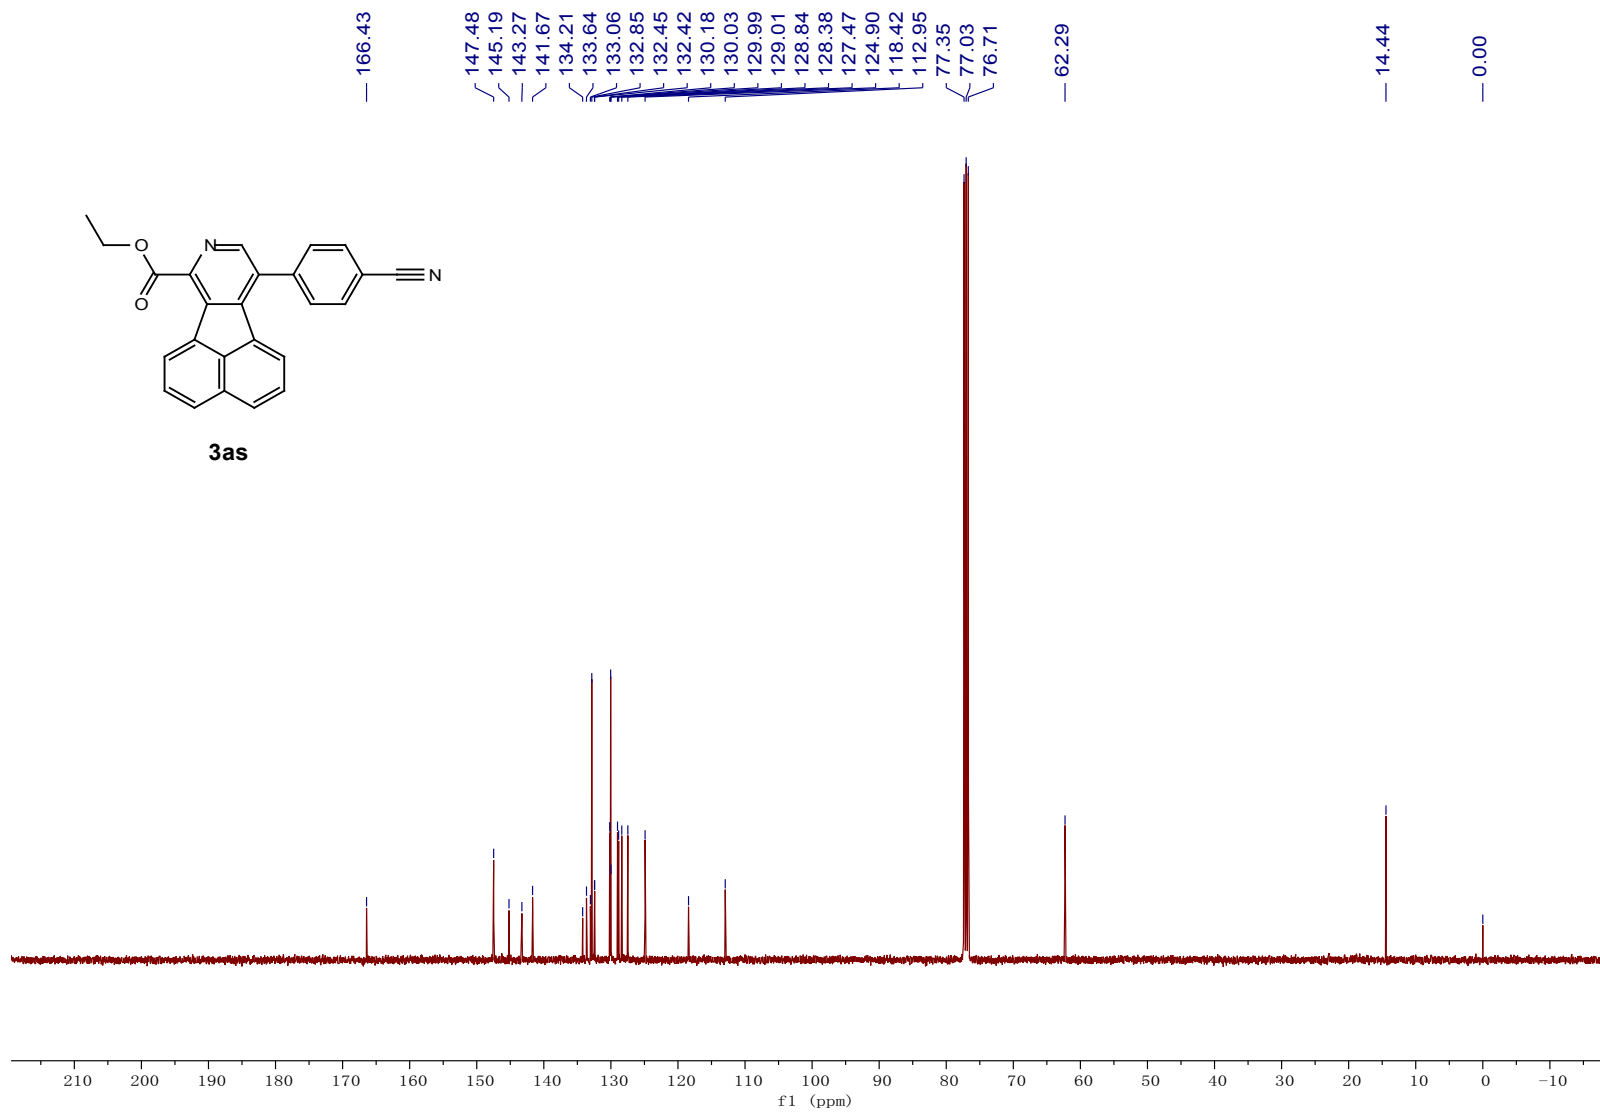

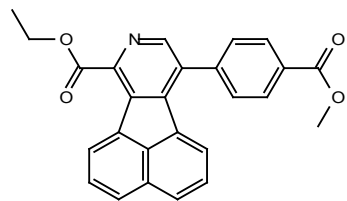

**3at**

8.928  
8.910  
8.603  
8.281  
8.261  
8.001  
7.992  
7.980  
7.973  
7.787  
7.768  
7.747  
7.714  
7.693  
7.475  
7.457  
7.438  
7.406  
7.388  
7.260

4.698  
4.680  
4.662  
4.644  
— 4.011

1.590  
1.572  
1.554

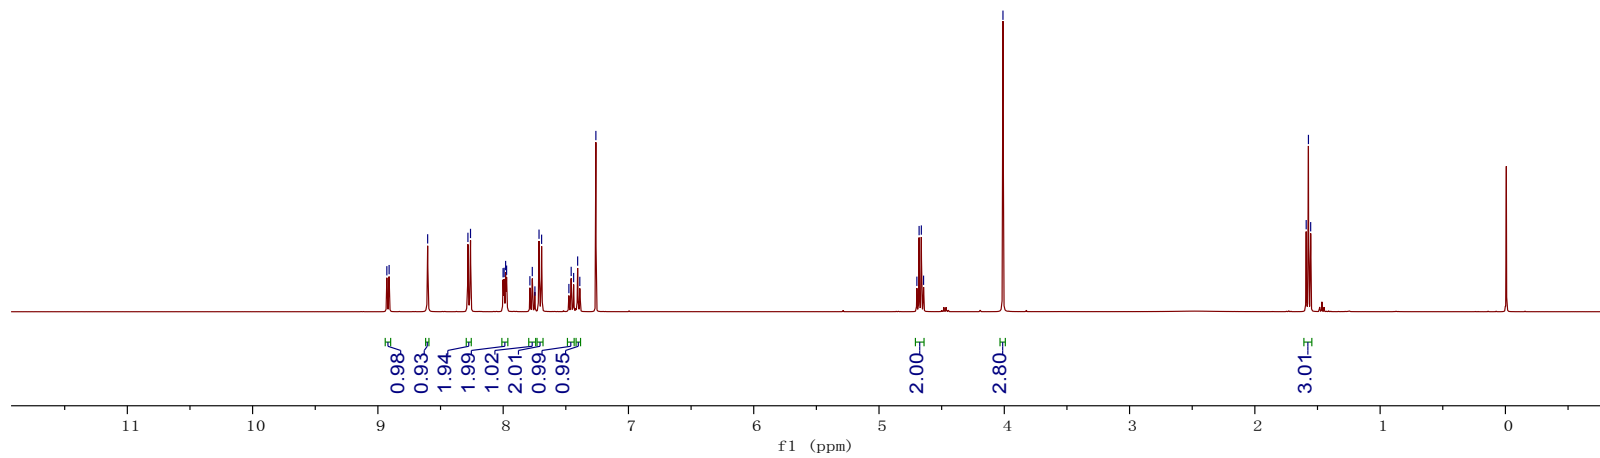



**3at**

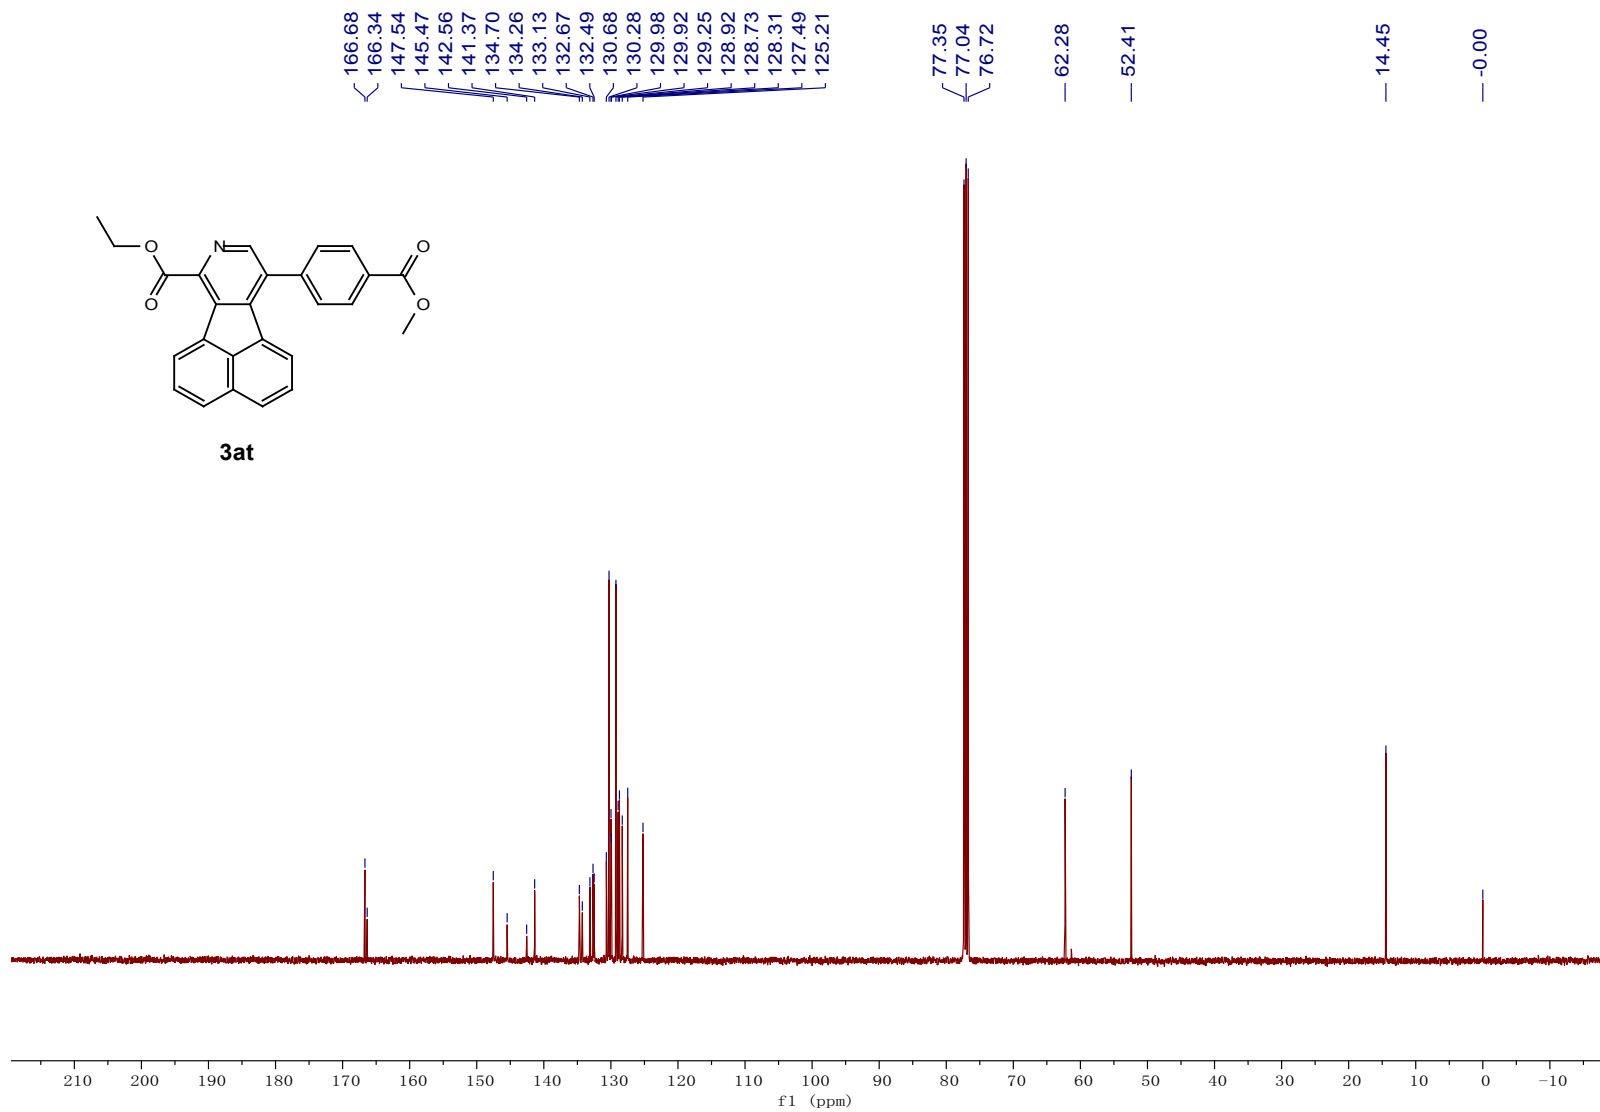

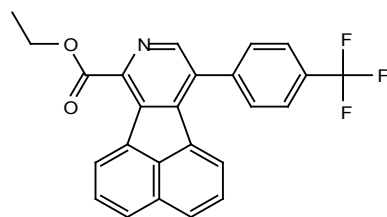

3au

8.905  
8.887  
8.568  
7.972  
7.951  
7.871  
7.850  
7.763  
7.743  
7.723  
7.480  
7.461  
7.442  
7.368  
7.350  
7.260

4.695  
4.677  
4.659  
4.641

1.588  
1.570  
1.552

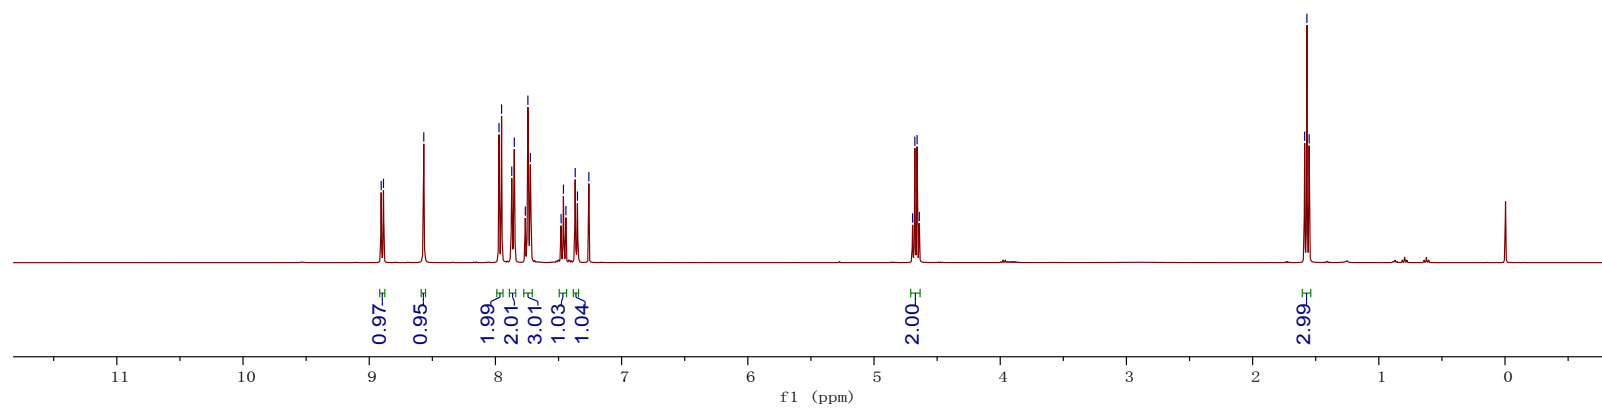





**3au**

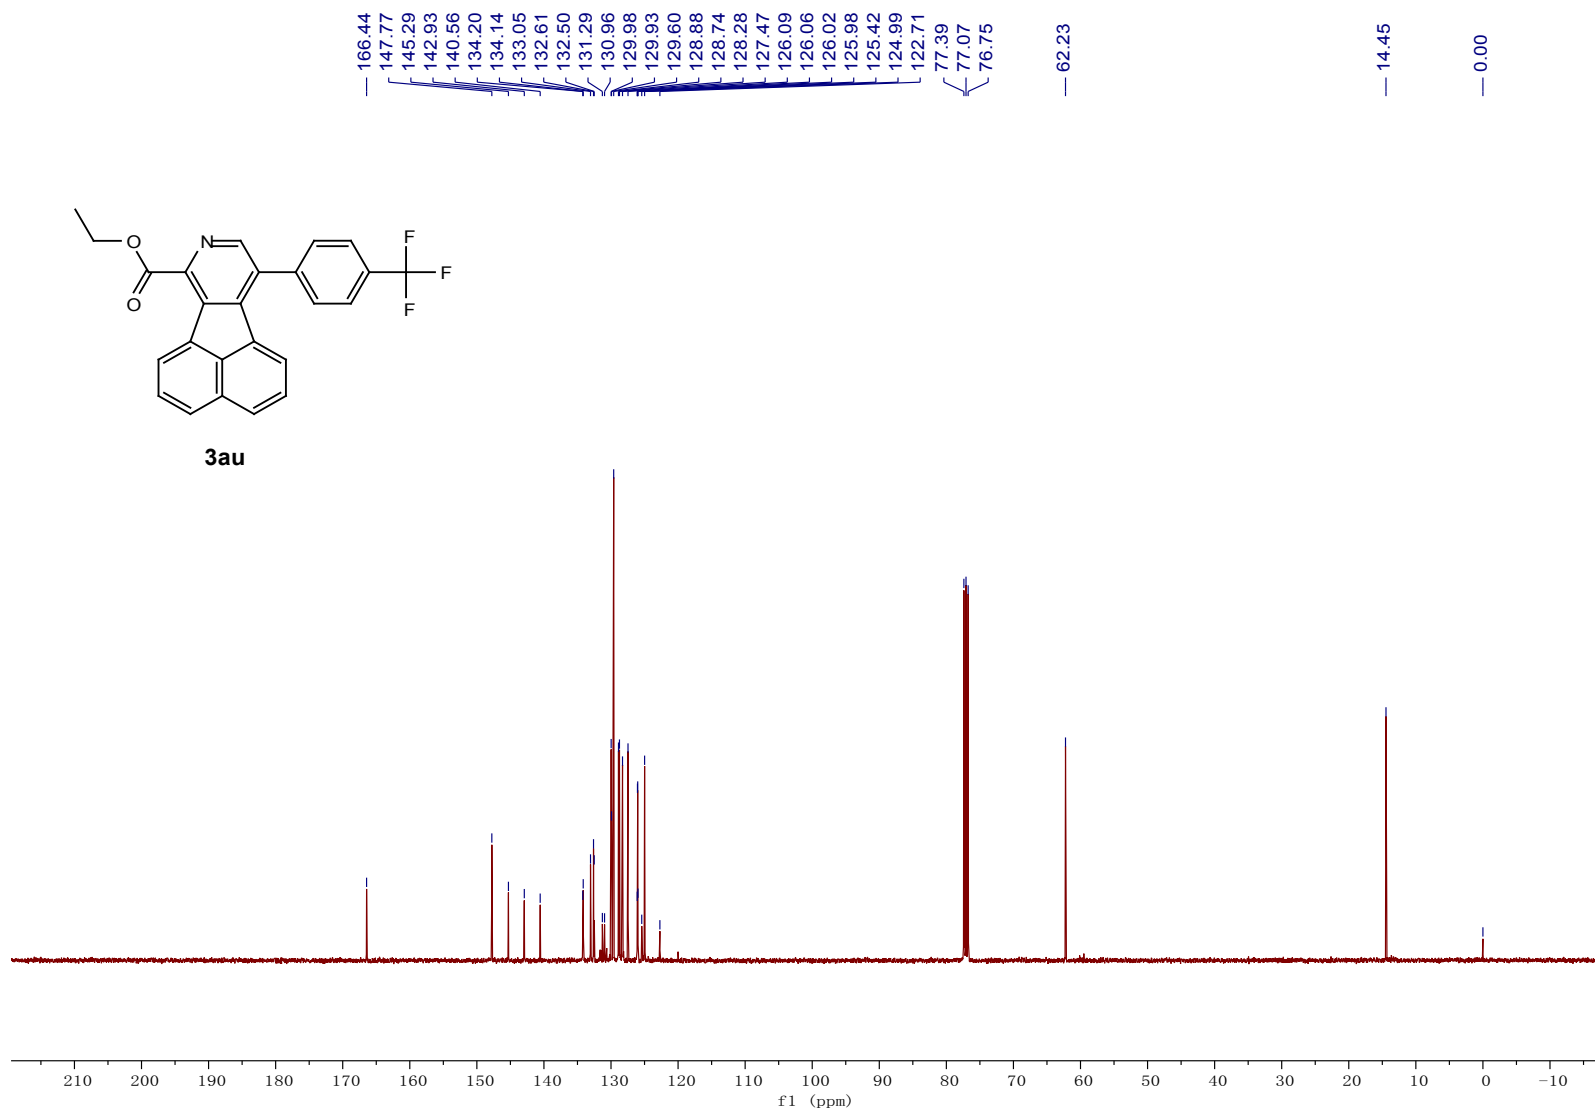

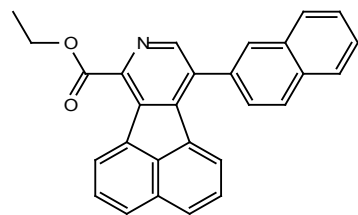

**3av**

8.958  
8.940  
8.711  
8.086  
8.064  
8.043  
8.010  
8.004  
7.985  
7.963  
7.949  
7.938  
7.931  
7.787  
7.767  
7.748  
7.728  
7.704  
7.637  
7.624  
7.617  
7.608  
7.599  
7.593  
7.580  
7.438  
7.421  
7.396  
7.376  
7.358  
7.260  
4.719  
4.702  
4.684  
4.666

1.611  
1.593  
1.576

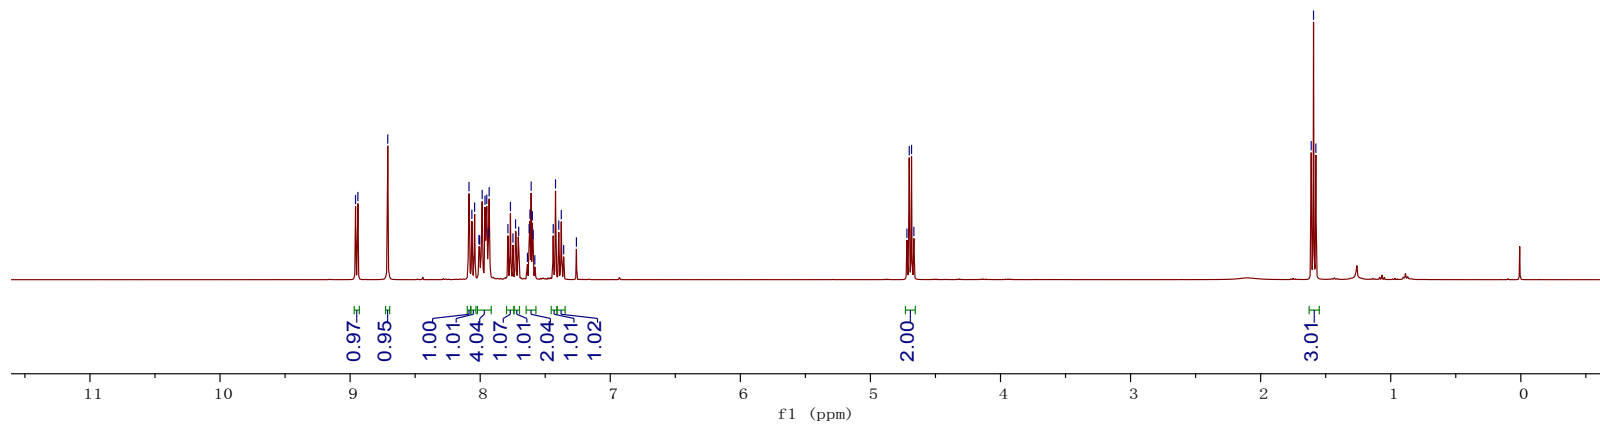

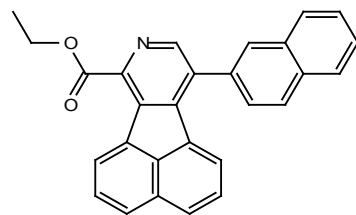

**3av**

166.63  
148.45  
145.46  
142.32  
135.69  
134.24  
134.18  
133.42  
133.25  
133.09  
133.05  
132.78  
129.84  
129.60  
128.69  
128.62  
128.60  
128.30  
128.10  
128.07  
127.94  
127.44  
126.87  
126.83  
126.77  
125.24  
77.35  
77.04  
76.72  
62.14

14.47

-0.00

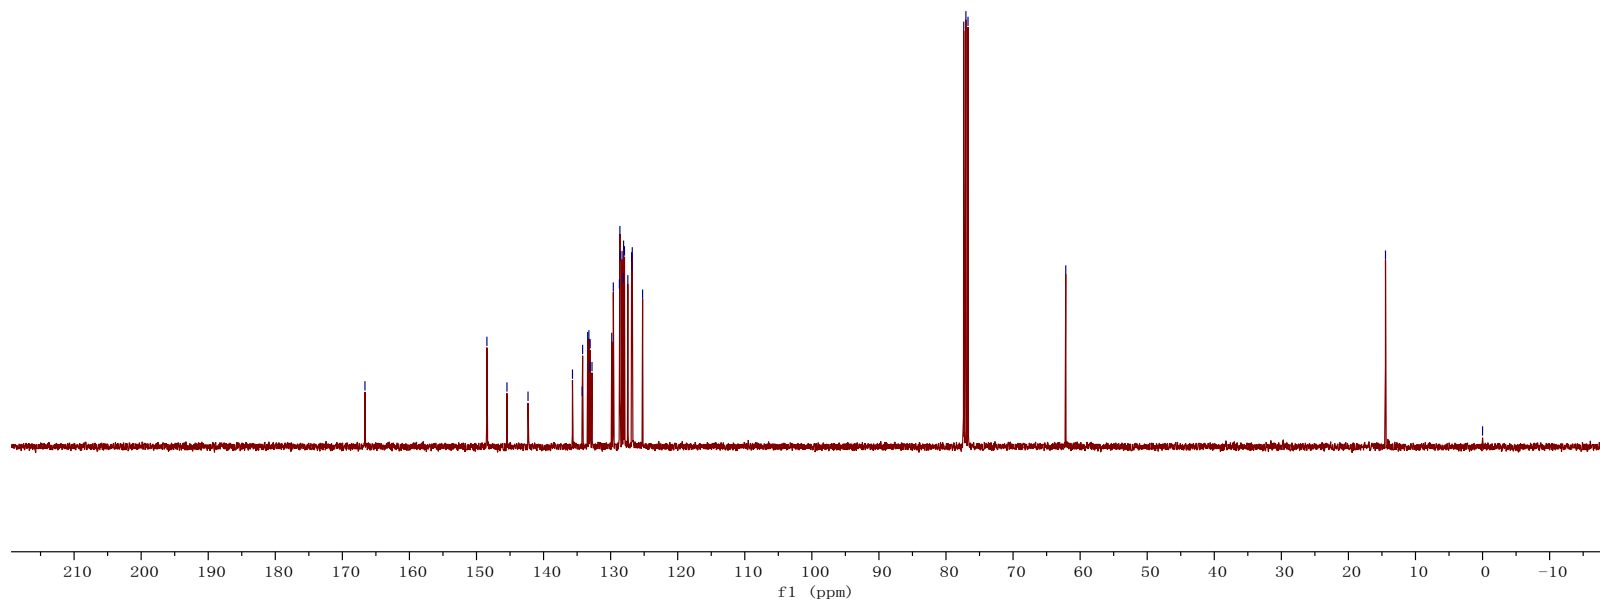

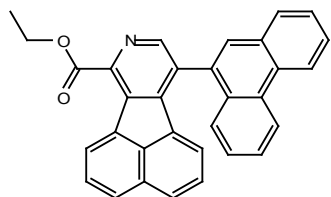

**3aw**

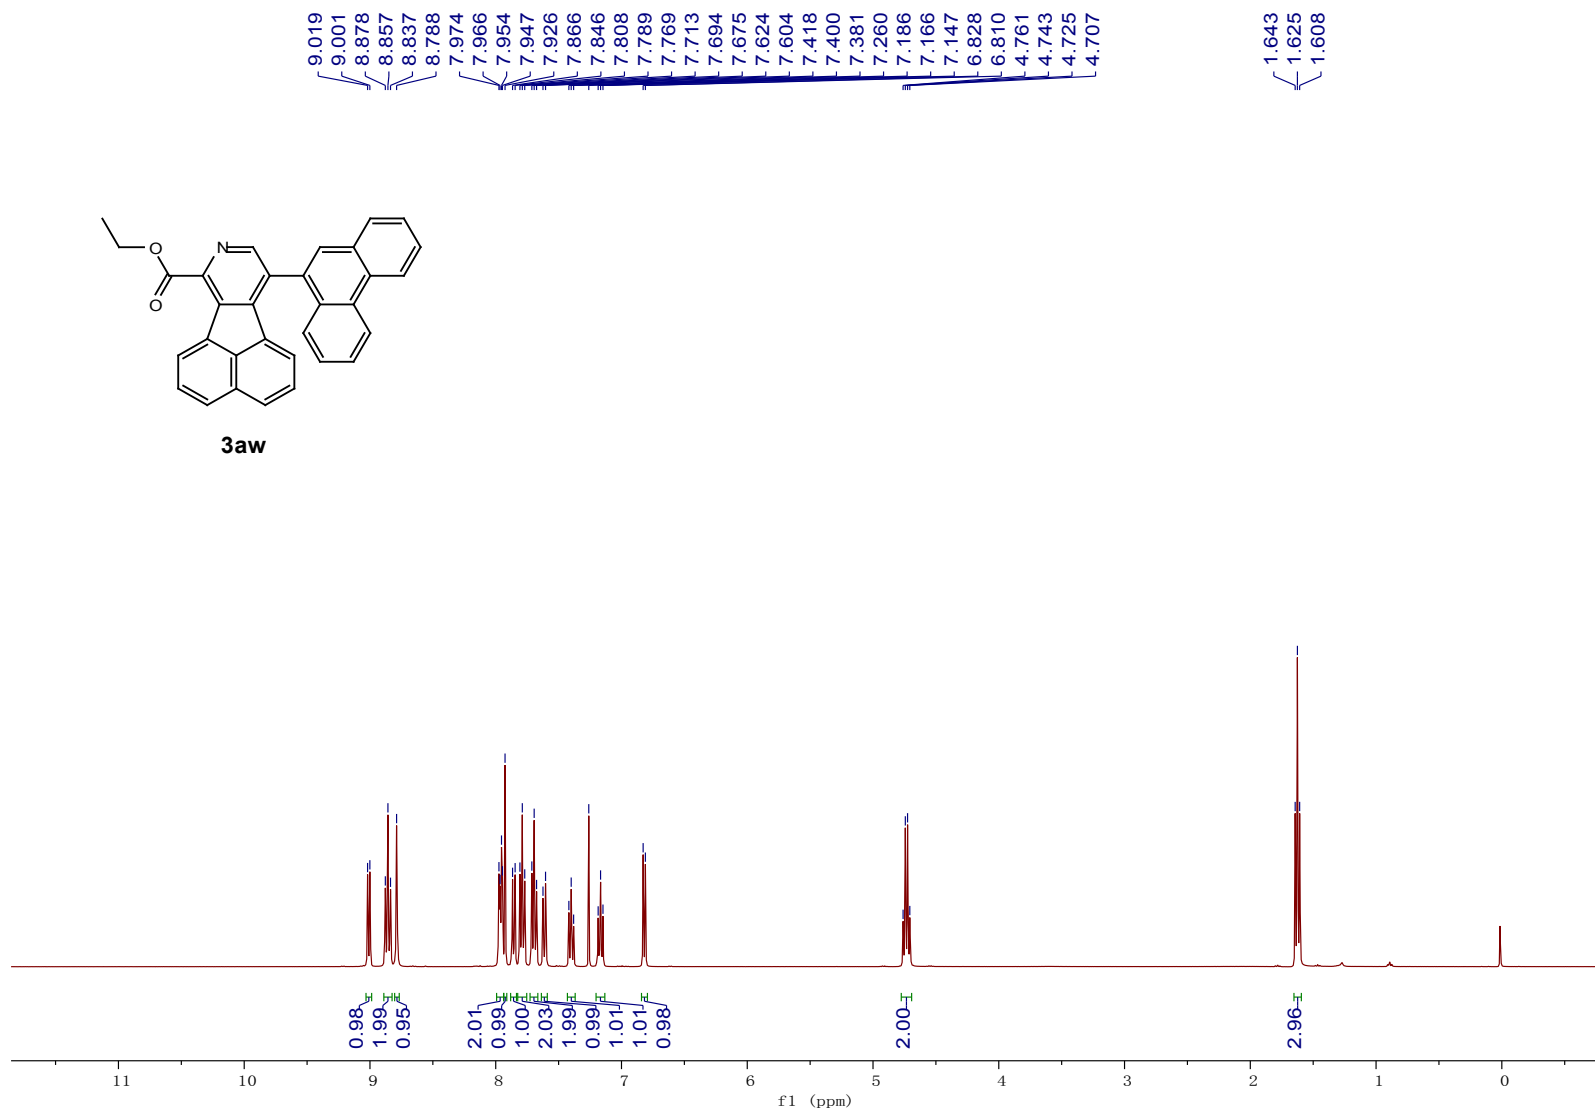



**3aw**

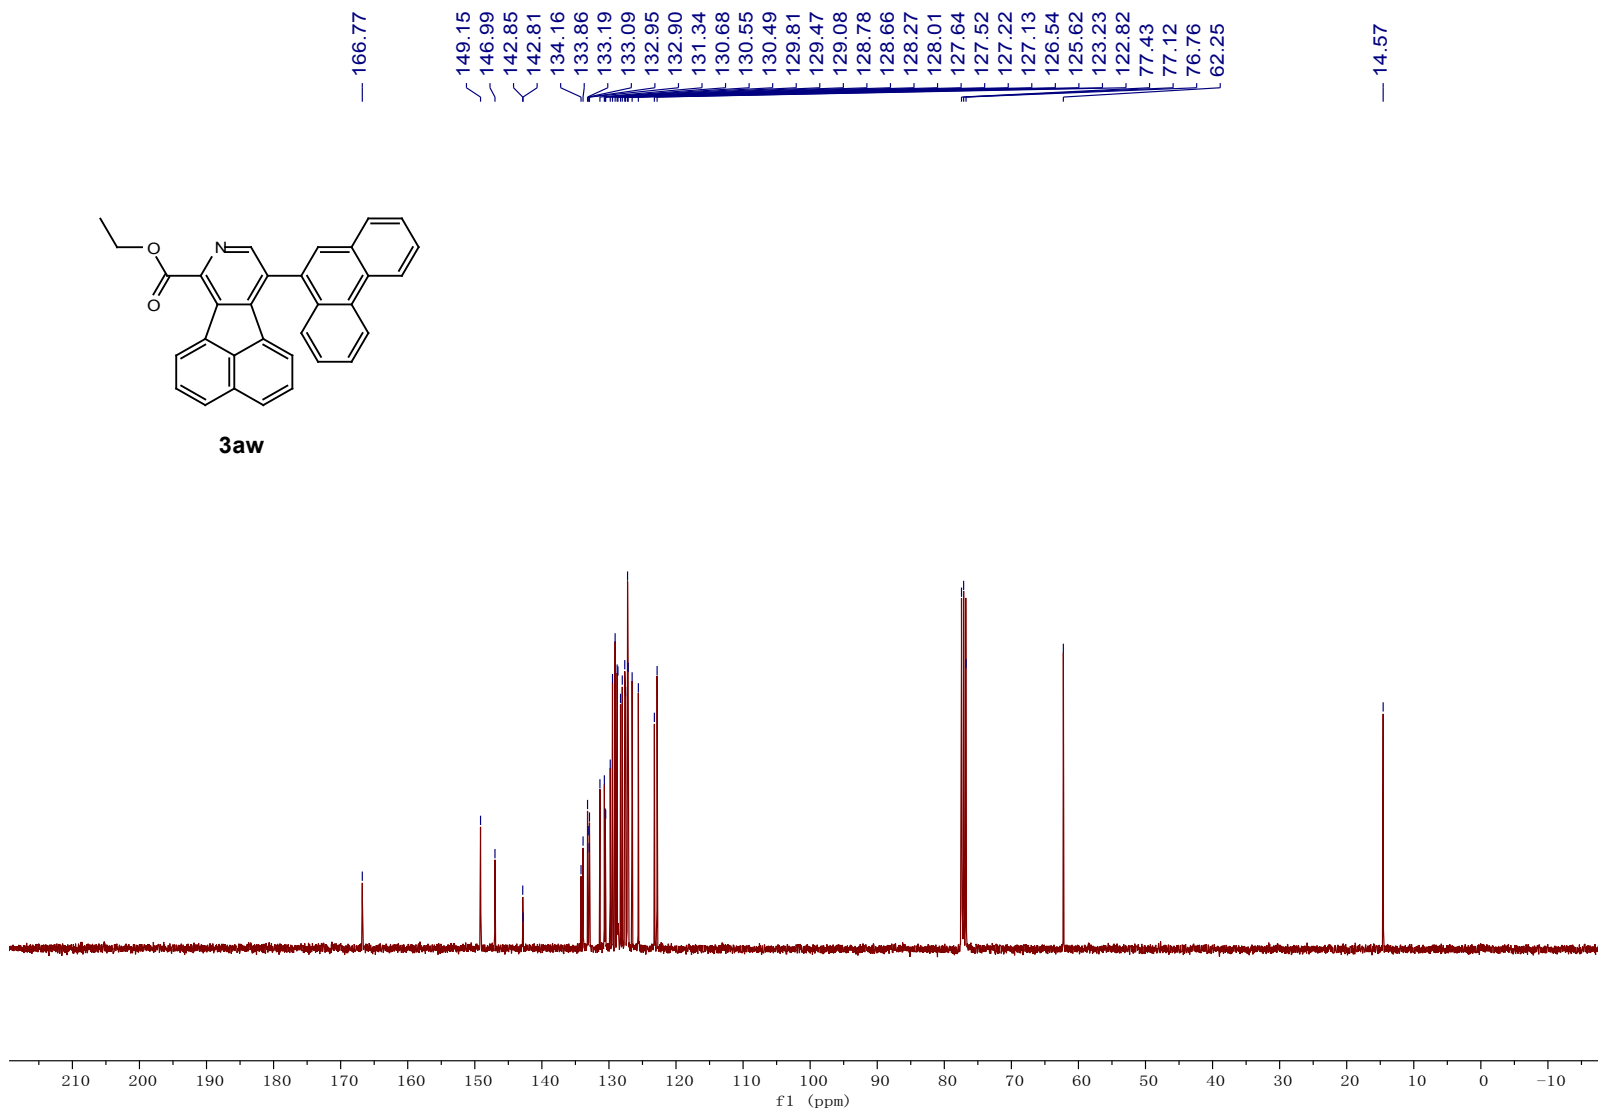

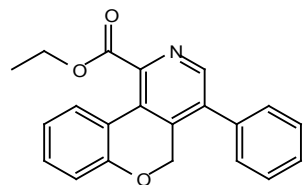

5aa

8.538  
7.554  
7.534  
7.511  
7.493  
7.474  
7.455  
7.343  
7.324  
7.315  
7.311  
7.296  
7.260  
7.089  
7.068  
7.048

5.021  
4.487  
4.469  
4.452  
4.434

1.371  
1.353  
1.335

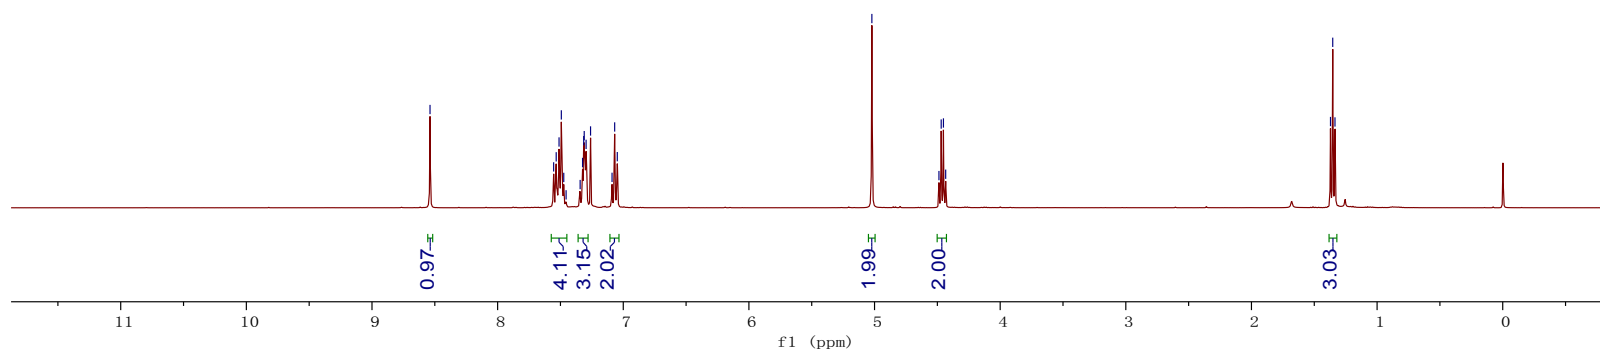

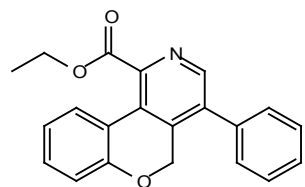

5aa

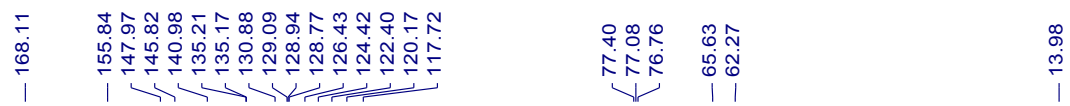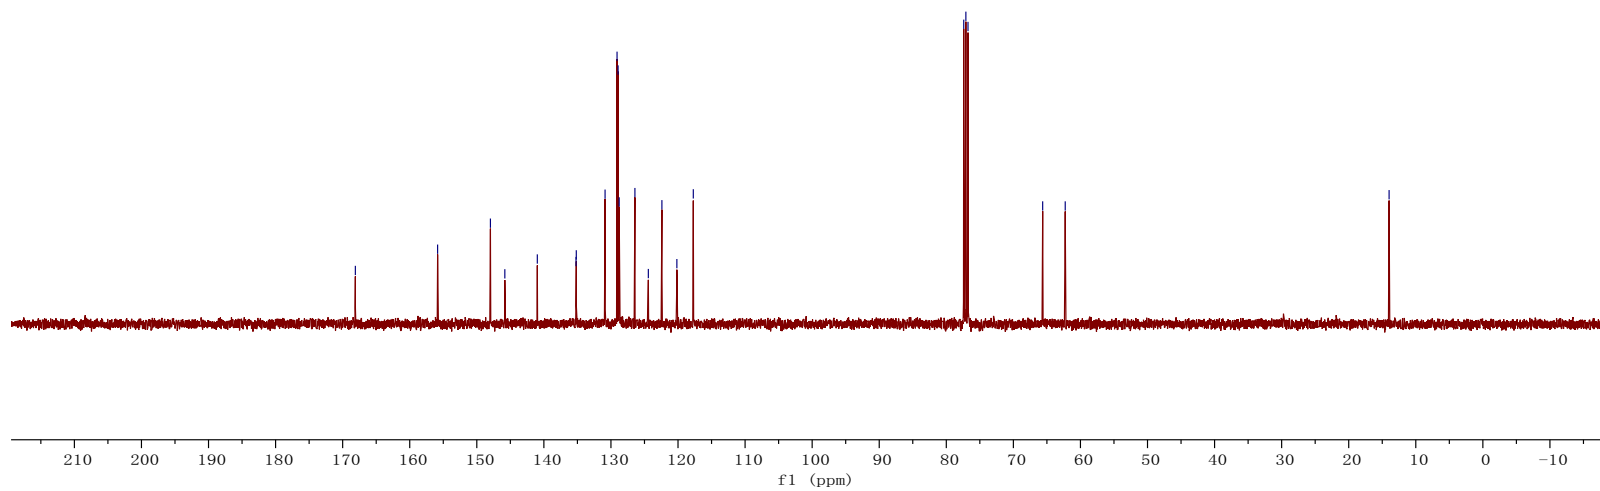

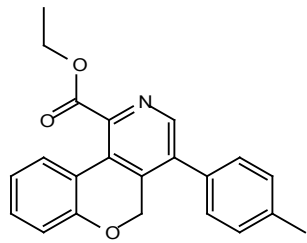

5ab

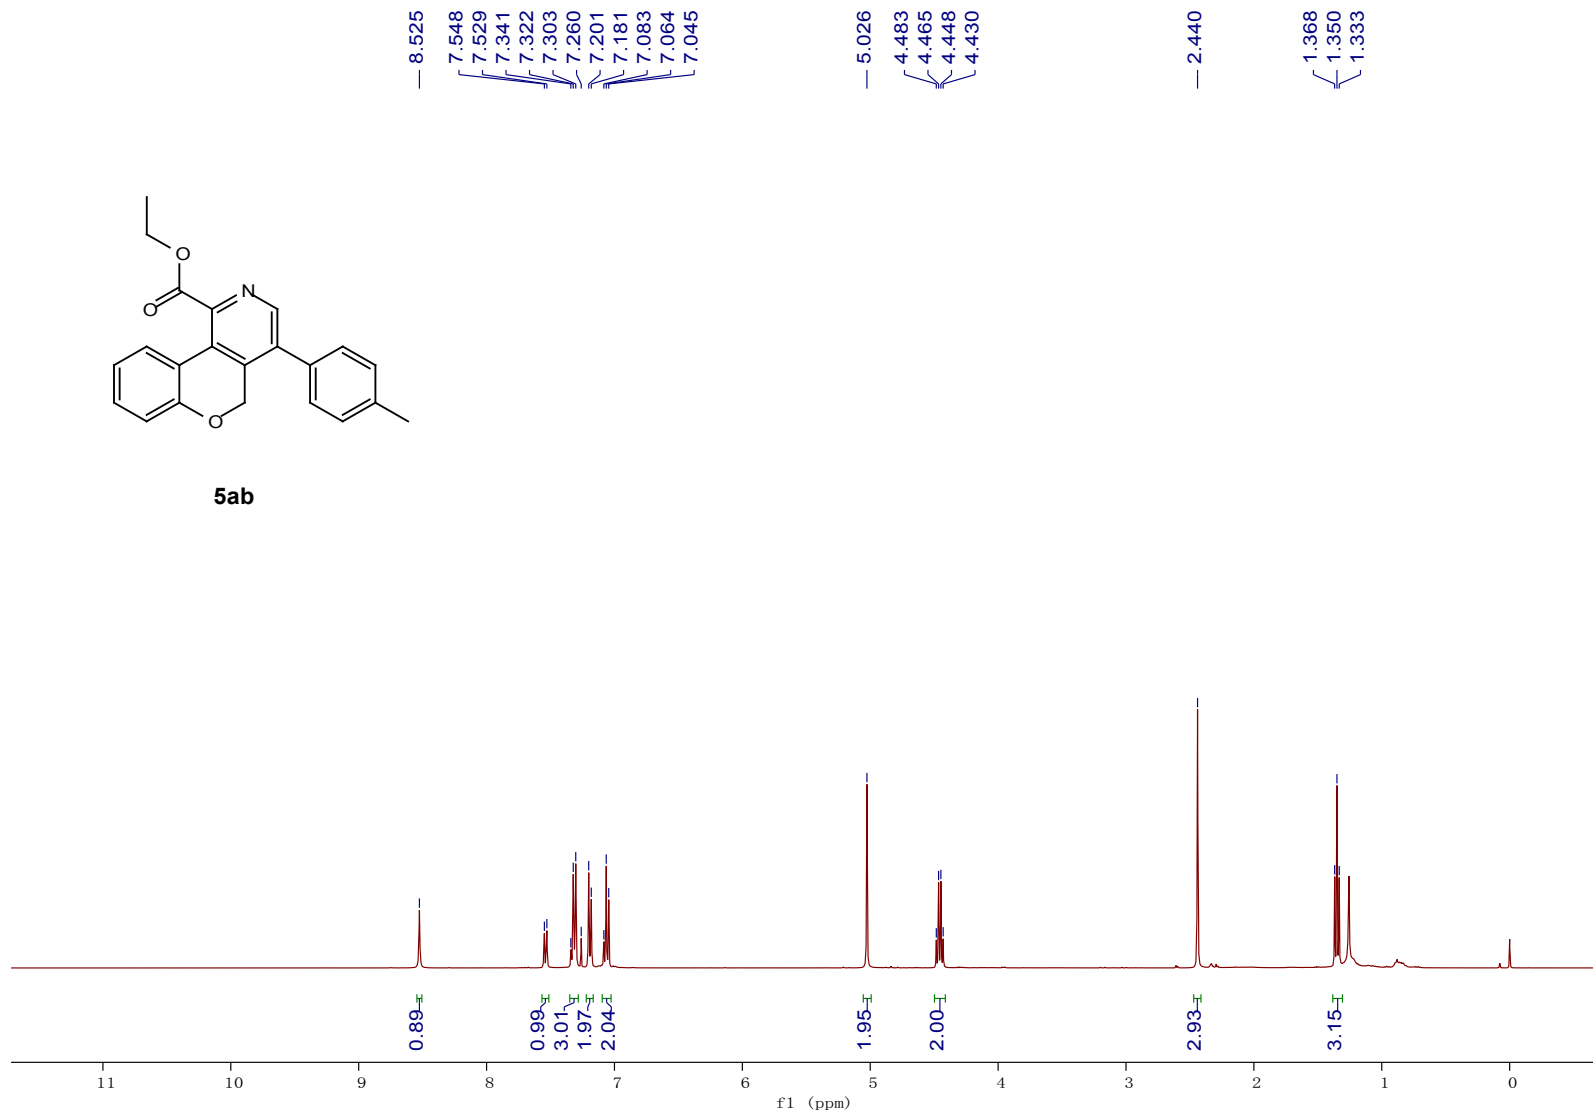



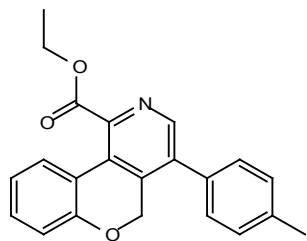

**5ab**

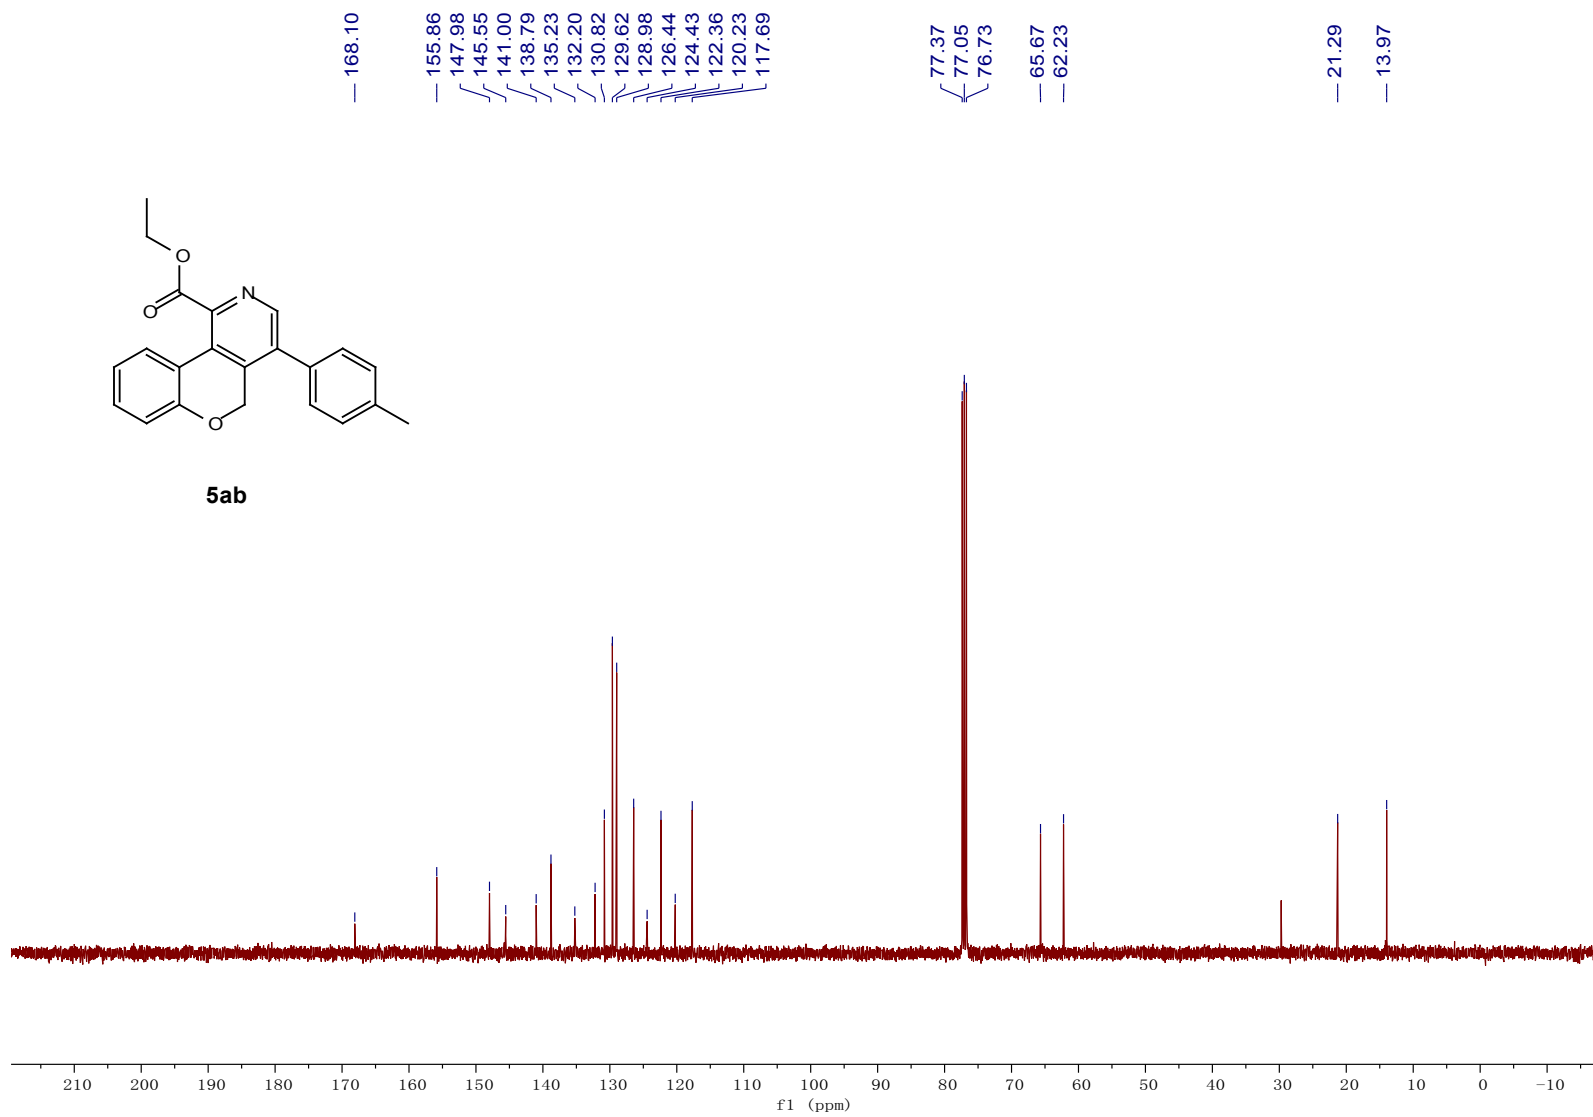

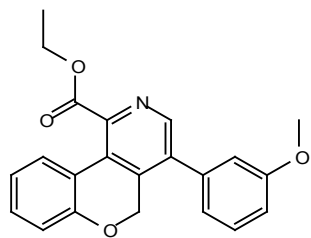

5ac

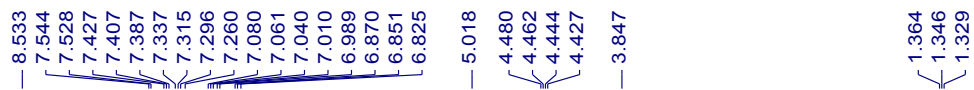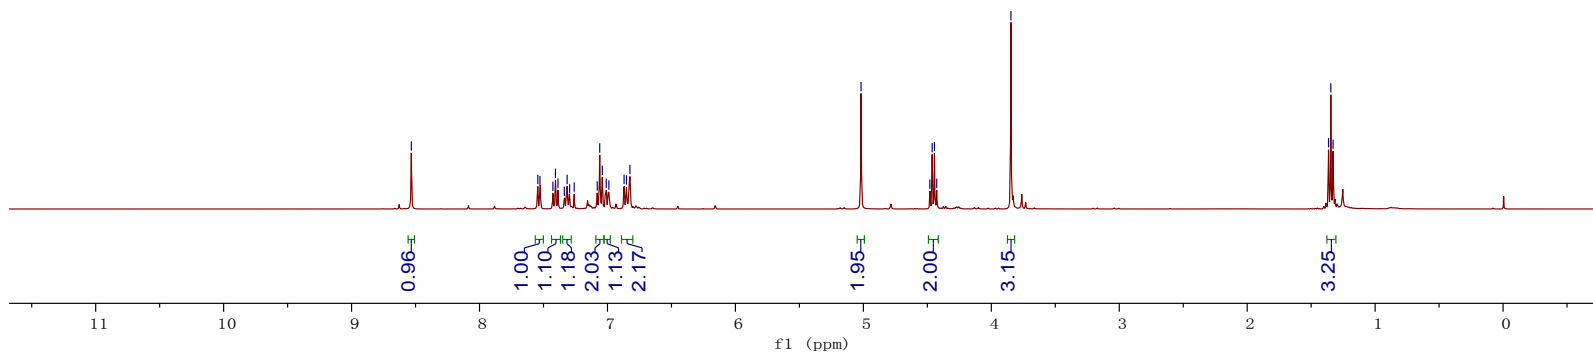



**5ac**

— 168.06  
— 159.83  
— 155.85  
— 147.82  
— 145.84  
— 141.03  
— 136.47  
— 135.10  
— 130.88  
— 130.01  
— 126.40  
— 124.40  
— 122.39  
— 121.44  
— 120.14  
— 117.71  
— 114.90  
— 114.02

77.45  
77.13  
76.81  
65.63  
62.25  
55.39

— 13.97

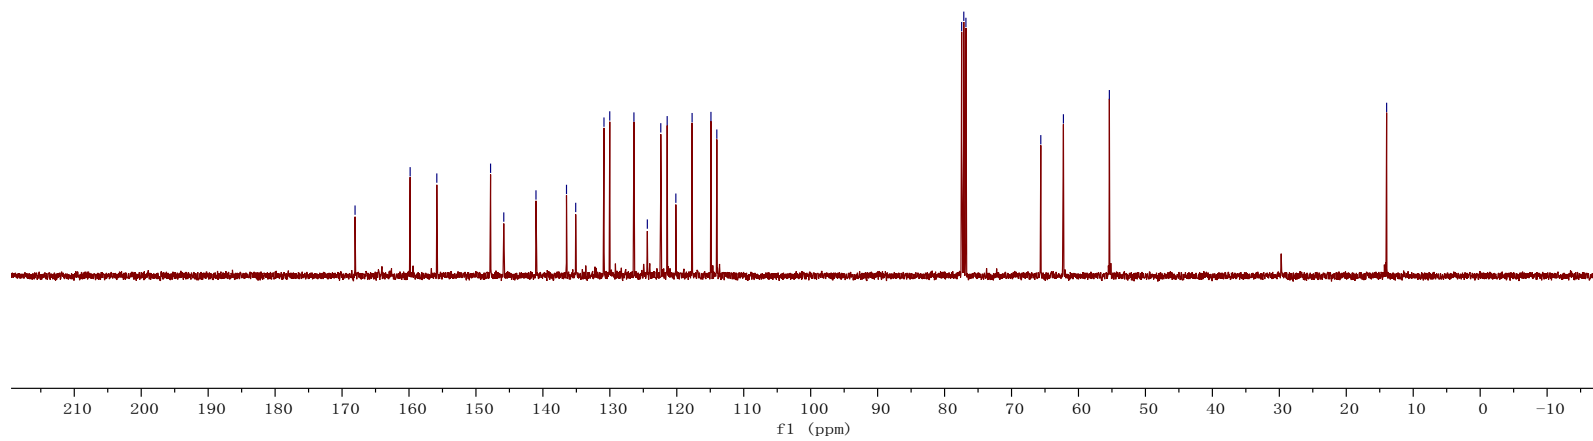

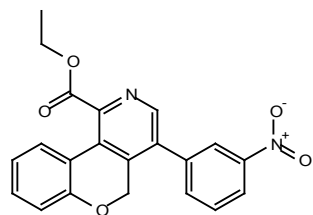

5ad

8.519  
8.340  
8.318  
8.175  
7.736  
7.716  
7.697  
7.668  
7.649  
7.535  
7.515  
7.343  
7.324  
7.304  
7.260  
7.088  
7.069  
7.047  
7.025  
4.988  
4.476  
4.458  
4.440  
4.422  
1.359  
1.341  
1.323

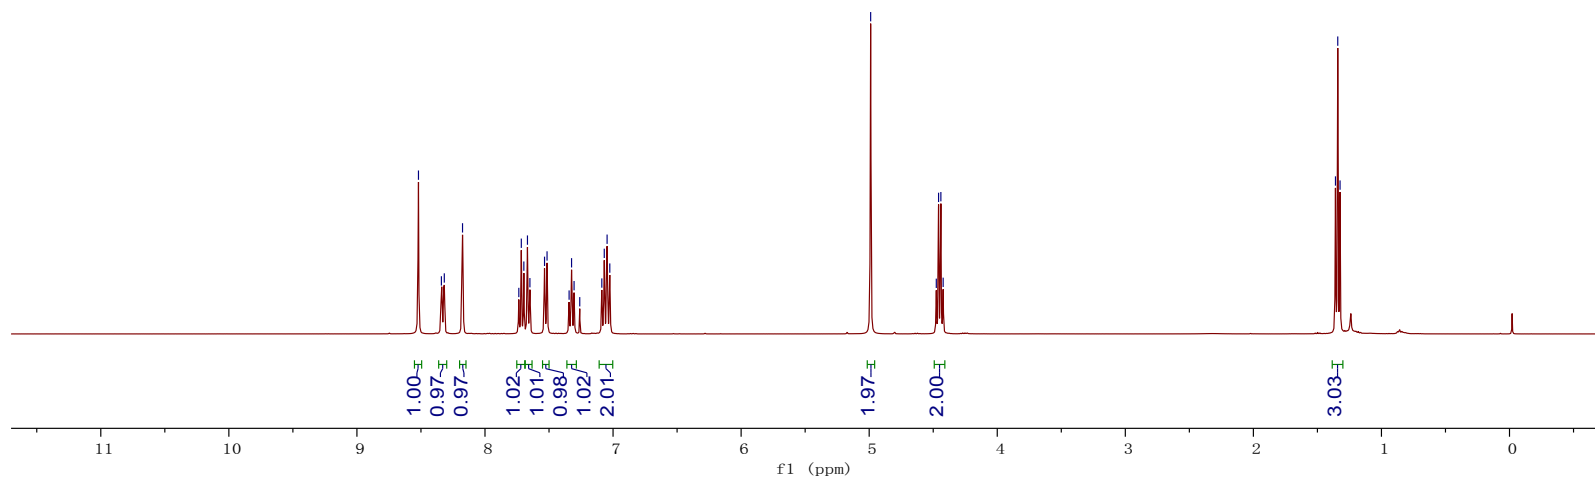

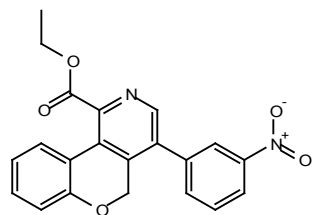

5ad

167.72  
155.71  
148.44  
147.55  
146.84  
141.10  
136.84  
135.02  
132.78  
131.23  
130.21  
126.37  
124.65  
123.93  
123.69  
122.64  
119.73  
117.78

77.42  
77.10  
76.78  
65.29  
62.42

13.95

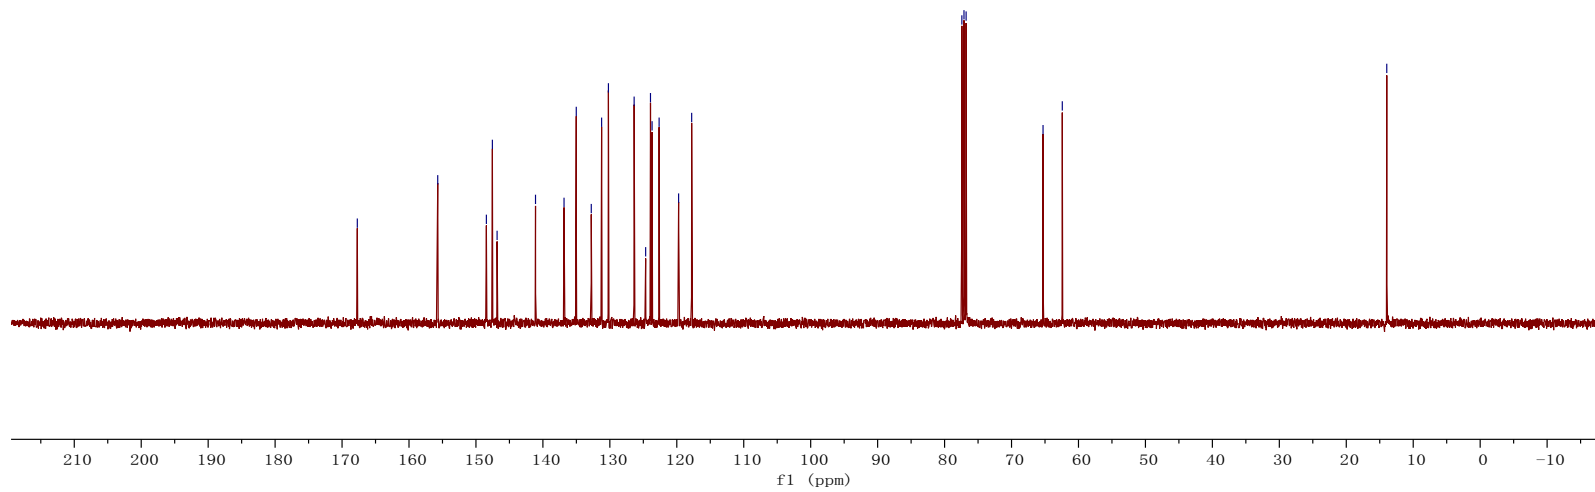

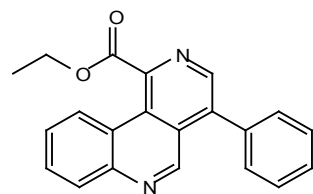

5ba

9.408  
8.820  
8.384  
8.363  
8.255  
8.235  
7.860  
7.841  
7.823  
7.741  
7.721  
7.703  
7.611  
7.591  
7.578  
7.561  
7.545  
7.260  
4.702  
4.684  
4.666  
4.648  
1.516  
1.498  
1.480

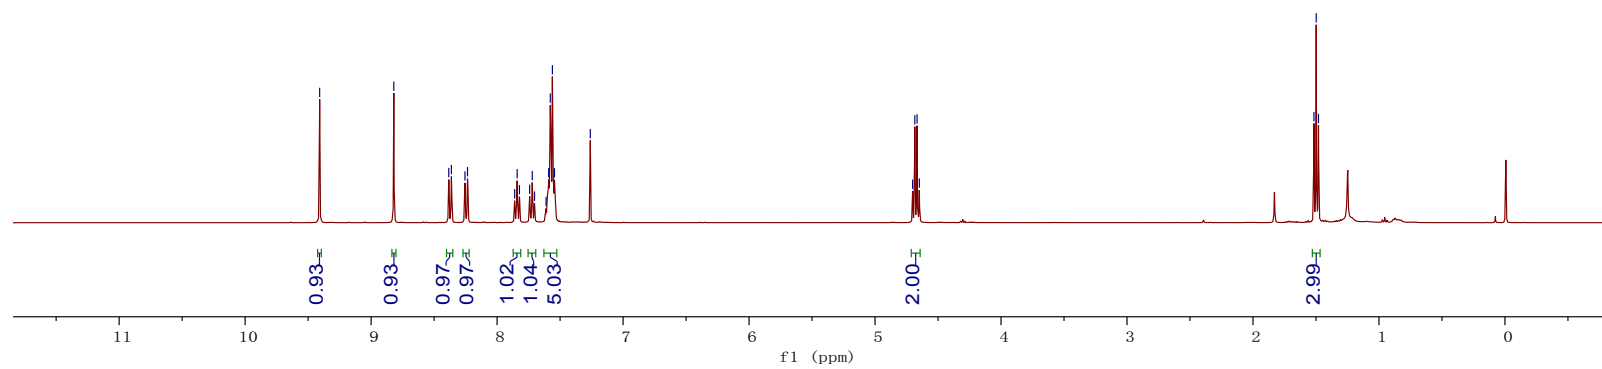

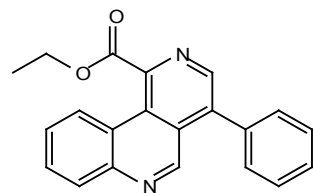

5ba

168.71  
150.46  
148.91  
145.32  
145.15  
135.82  
134.53  
130.71  
130.41  
130.04  
128.99  
128.97  
128.14  
128.06  
124.57  
123.55  
120.50  
77.35  
77.03  
76.72  
62.88  
14.01  
0.00

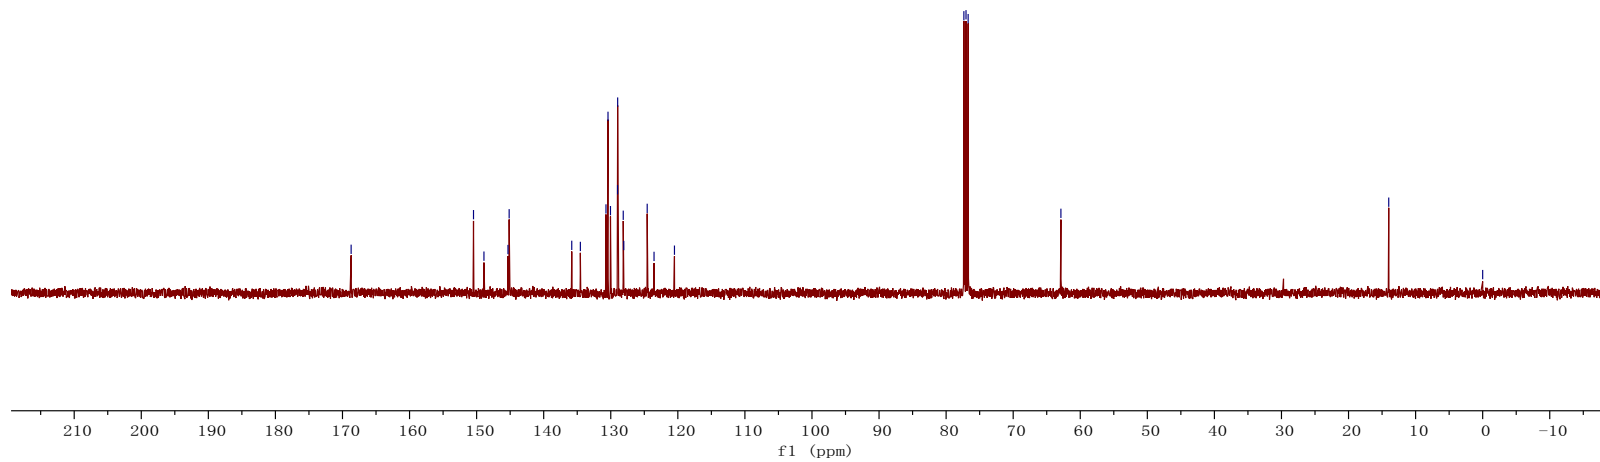

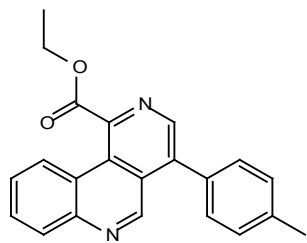

5bb

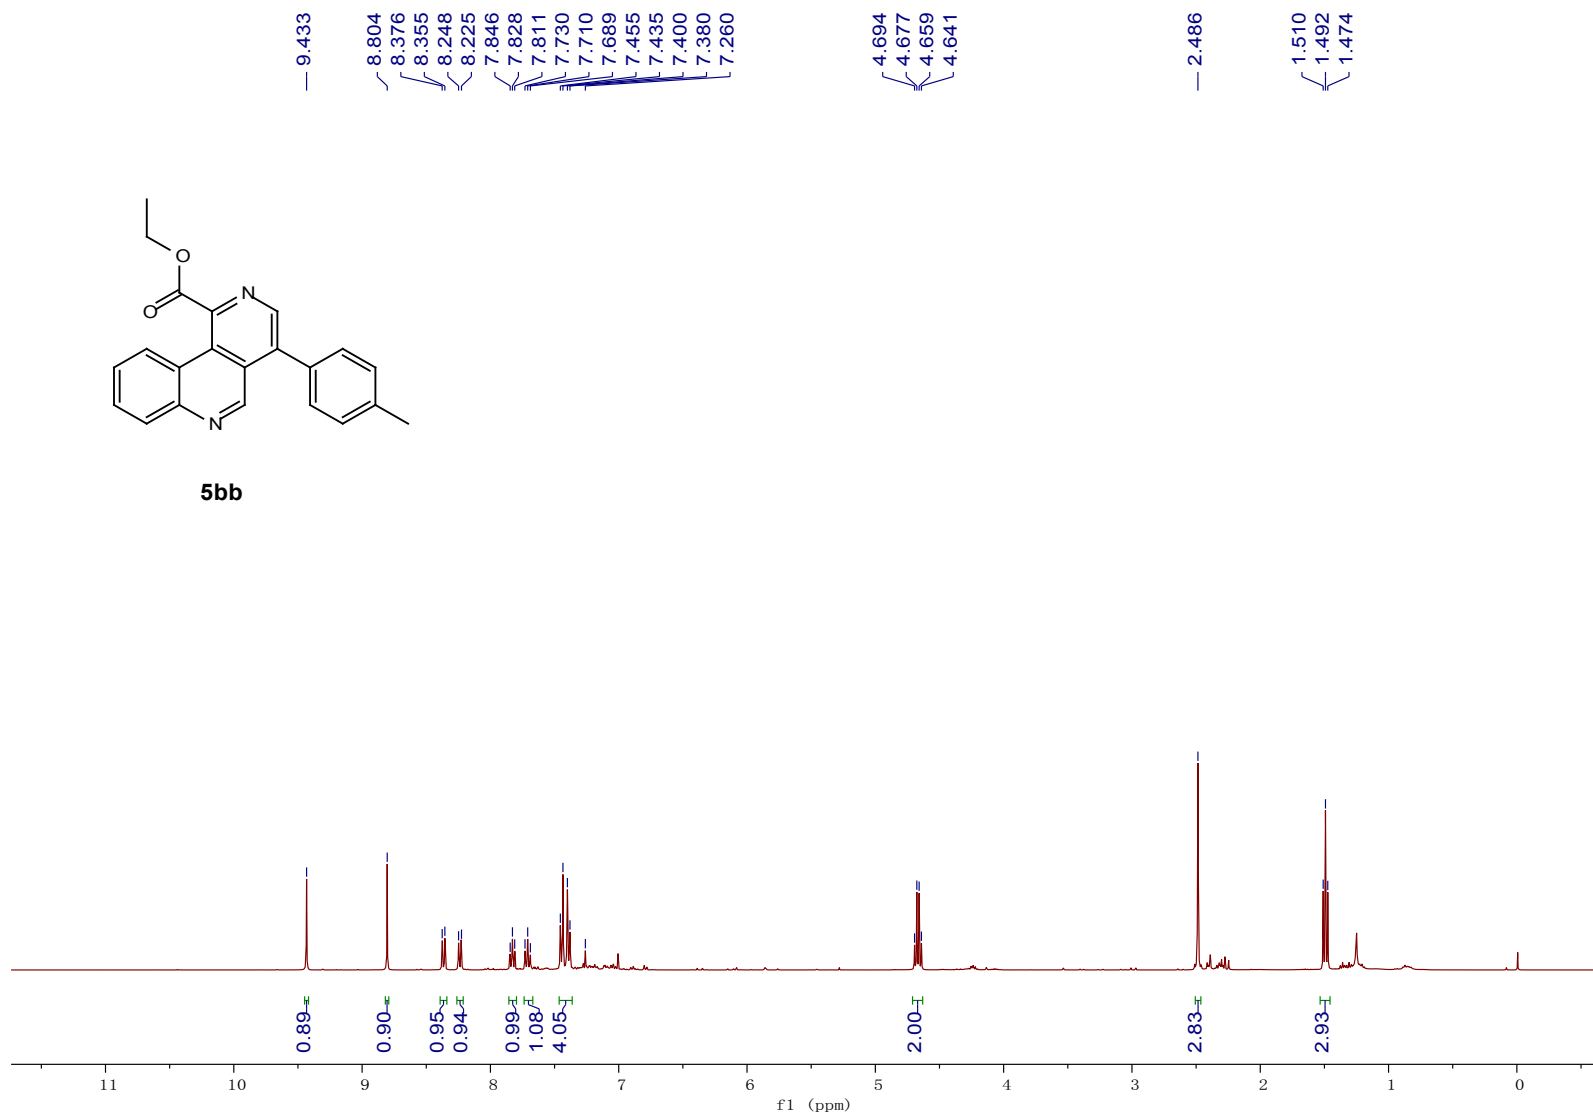



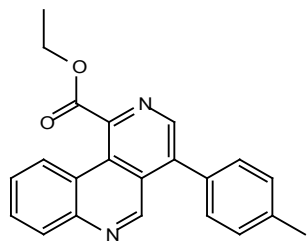

**5bb**

168.78  
150.63  
148.67  
145.34  
145.25  
139.06  
135.91  
131.59  
130.69  
130.34  
130.01  
129.72  
128.11  
128.09  
124.61  
123.58  
120.57

77.40  
77.08  
76.76

62.86

21.36

14.03

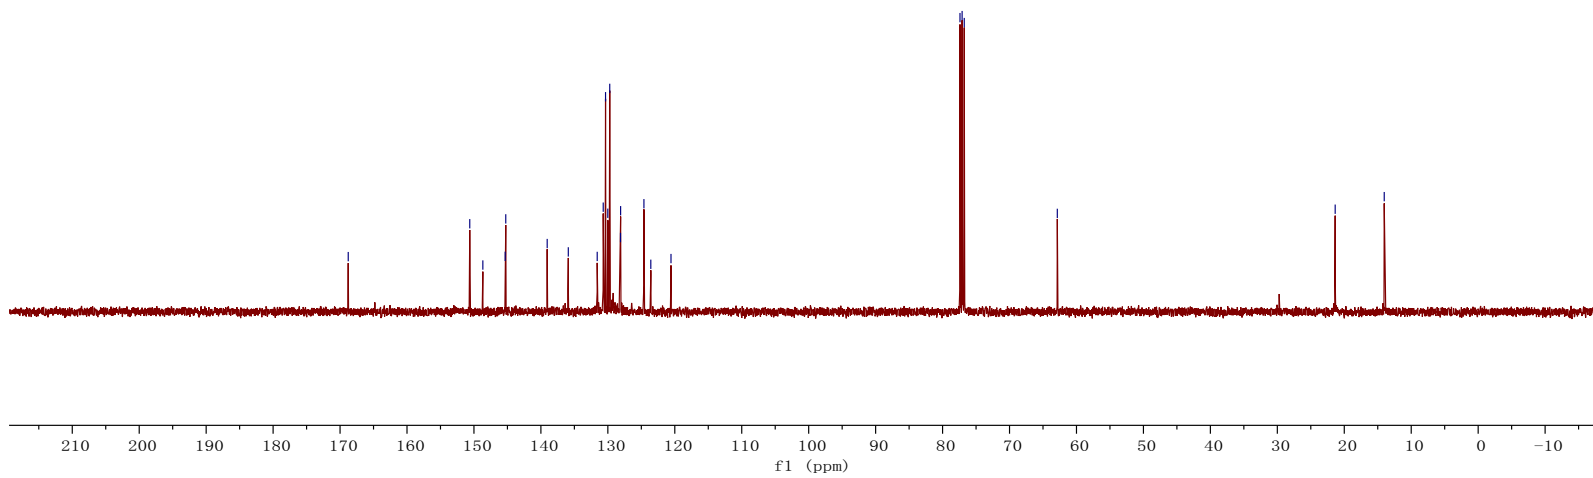

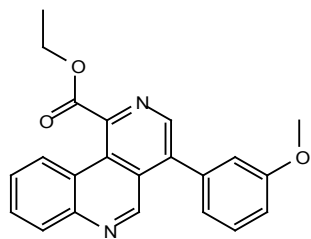

**5bc**

9.419  
8.812  
8.367  
8.346  
8.236  
8.216  
7.838  
7.818  
7.798  
7.724  
7.703  
7.683  
7.497  
7.478  
7.456  
7.260  
7.116  
7.097  
7.082  
7.064  
4.687  
4.670  
4.652  
4.634  
3.862  
1.501  
1.483  
1.465

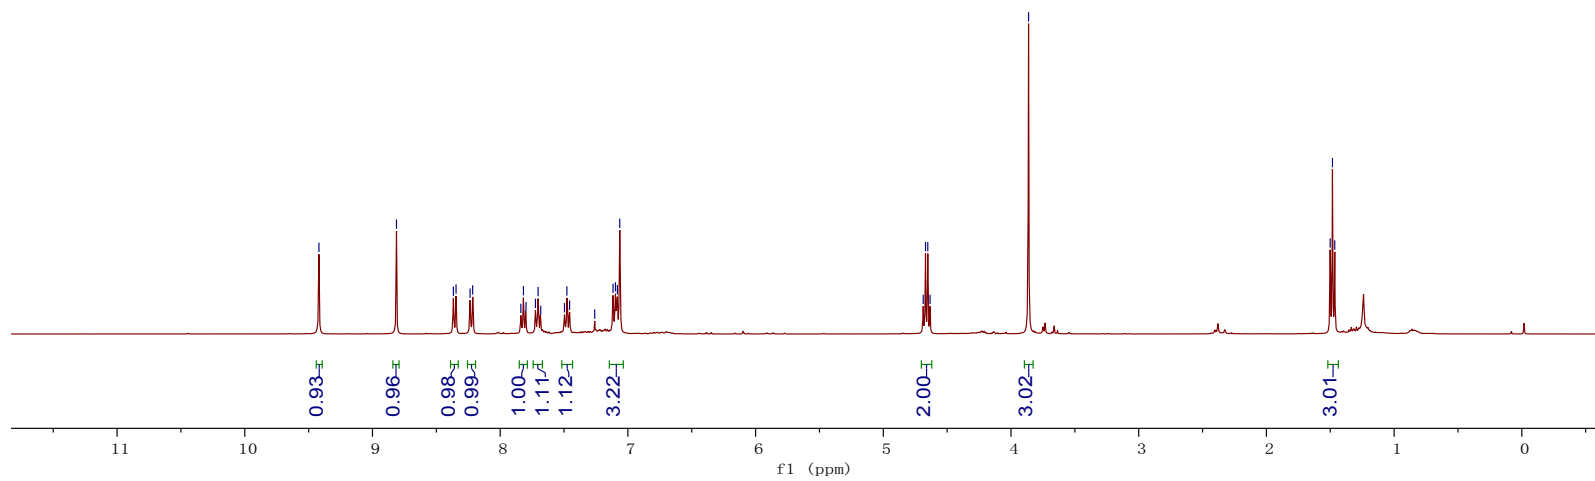

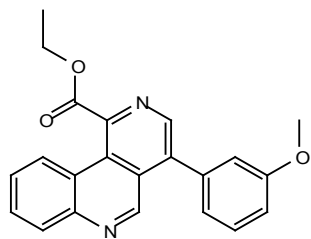

**5bc**

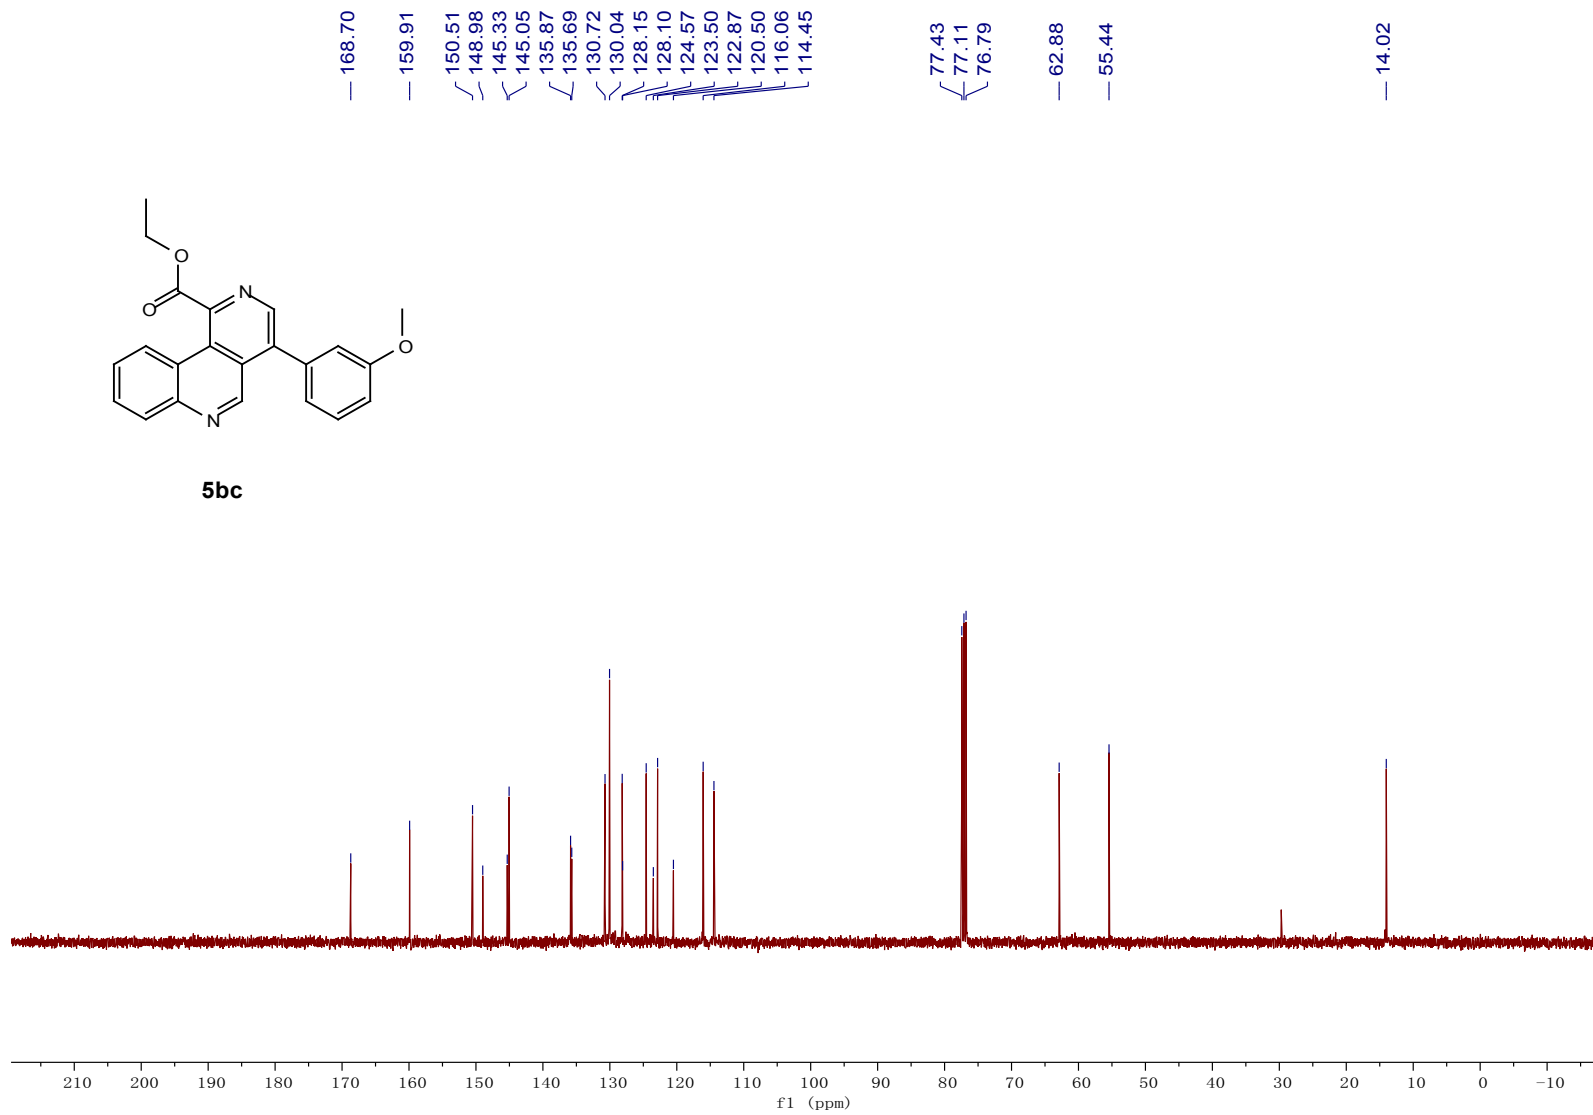

9.272  
8.801  
8.436  
8.430  
8.407  
8.371  
8.349  
8.239  
8.219  
7.899  
7.879  
7.866  
7.849  
7.828  
7.812  
7.792  
7.773  
7.753  
7.733  
7.715  
7.260

4.692  
4.674  
4.656  
4.638

1.502  
1.484  
1.466

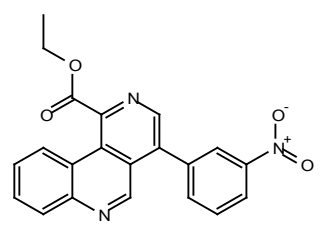

5bd

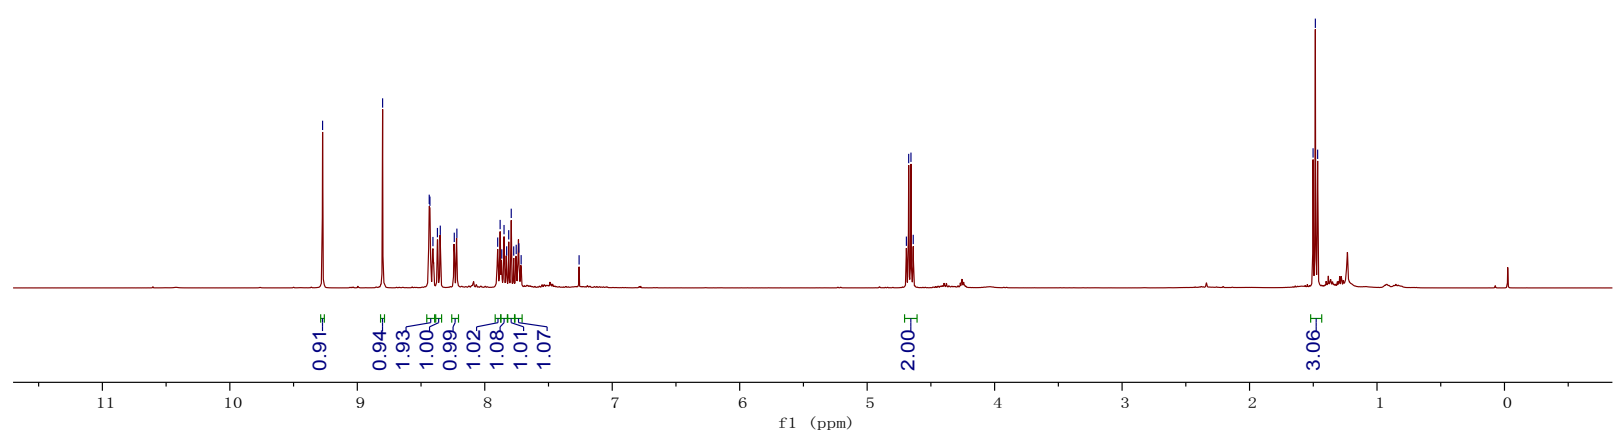

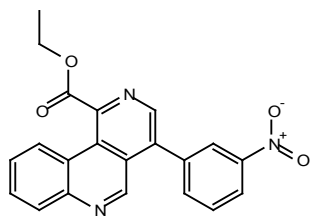

5bd

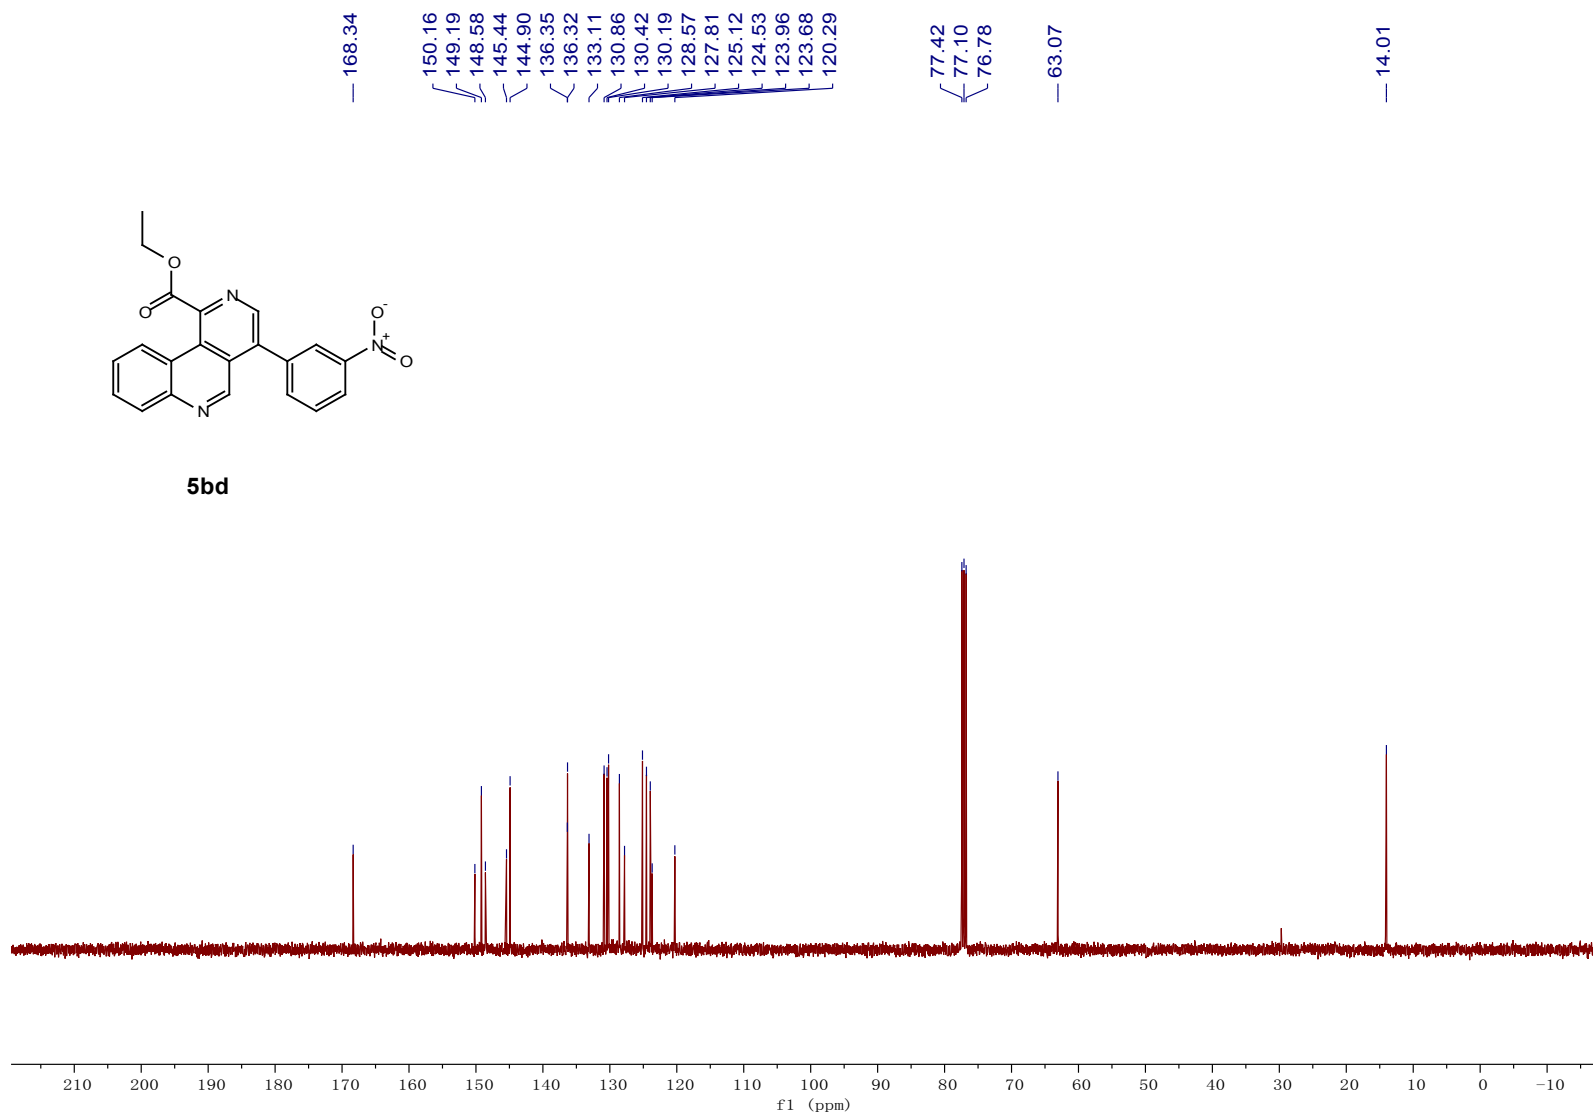

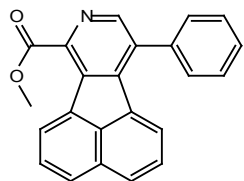

**3ba**

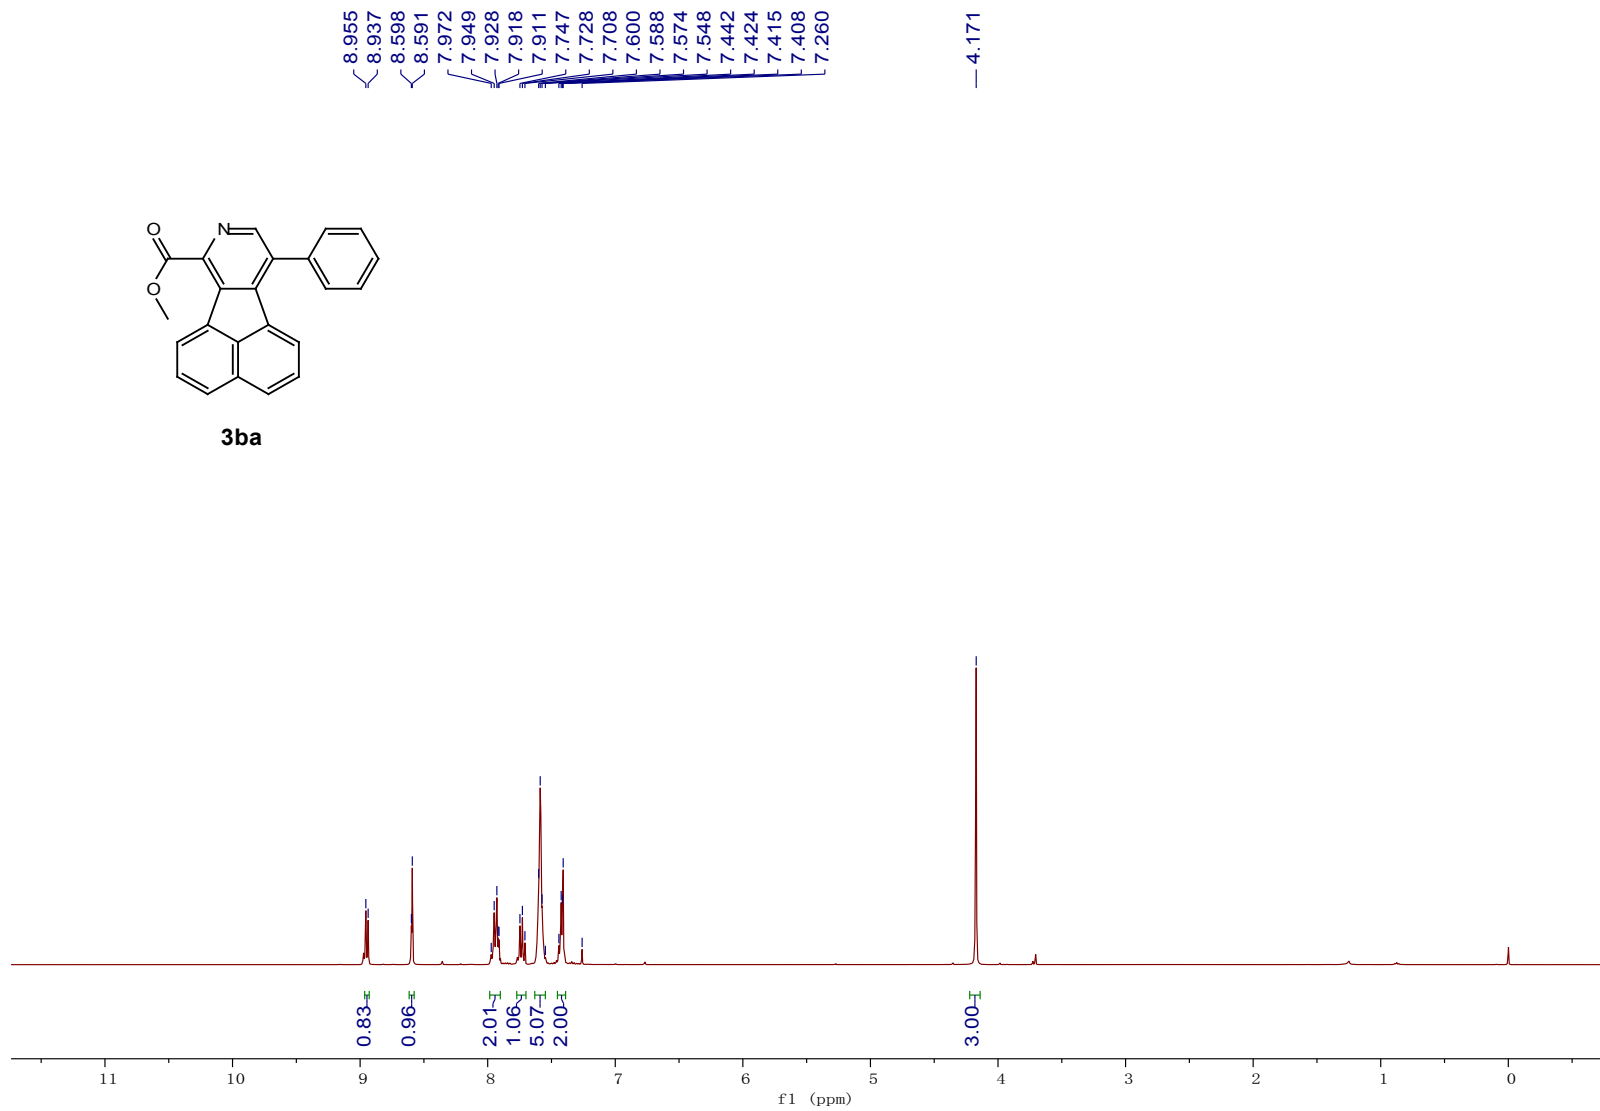



**3ba**

166.92  
148.18  
145.41  
141.73  
136.71  
135.96  
134.50  
133.08  
133.00  
132.68  
129.83  
129.61  
129.06  
129.01  
128.91  
128.75  
128.62  
128.32  
127.40  
125.15

77.42  
77.10  
76.79

53.04

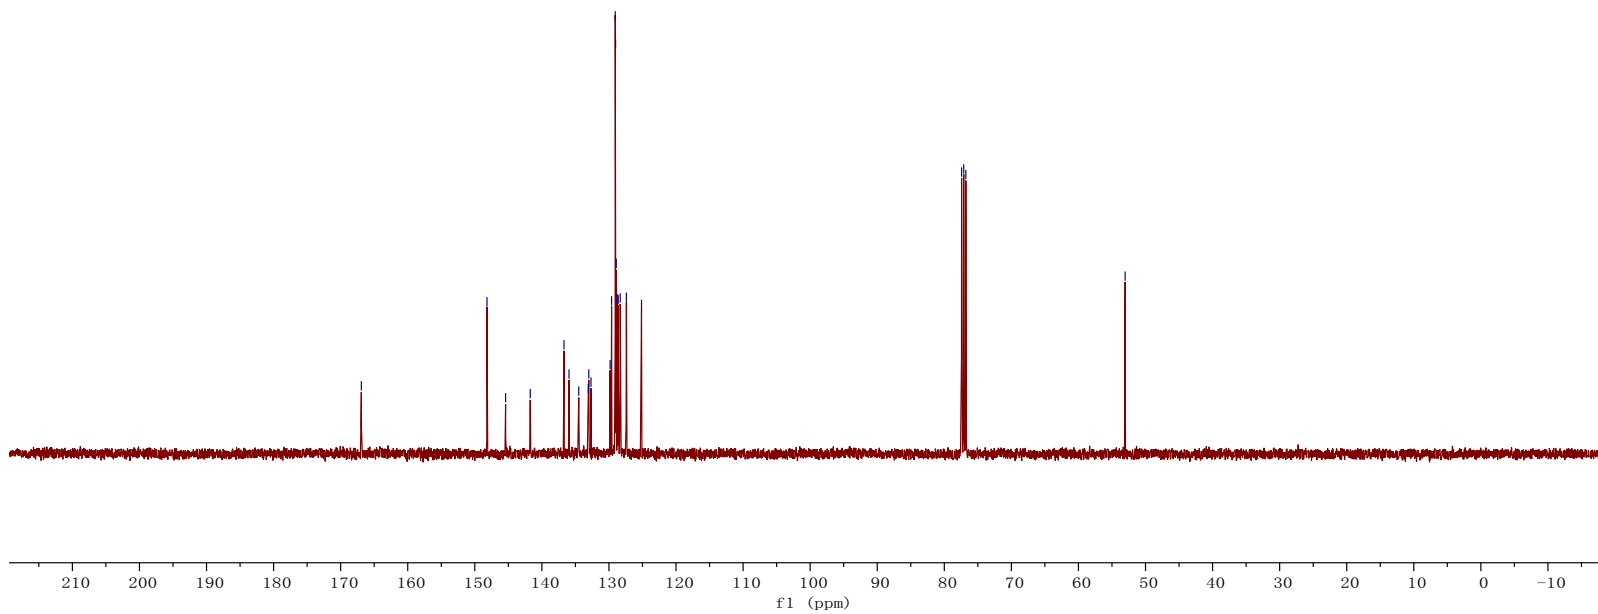

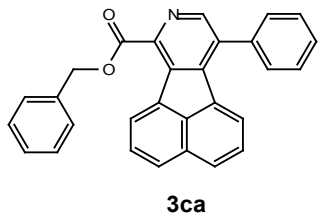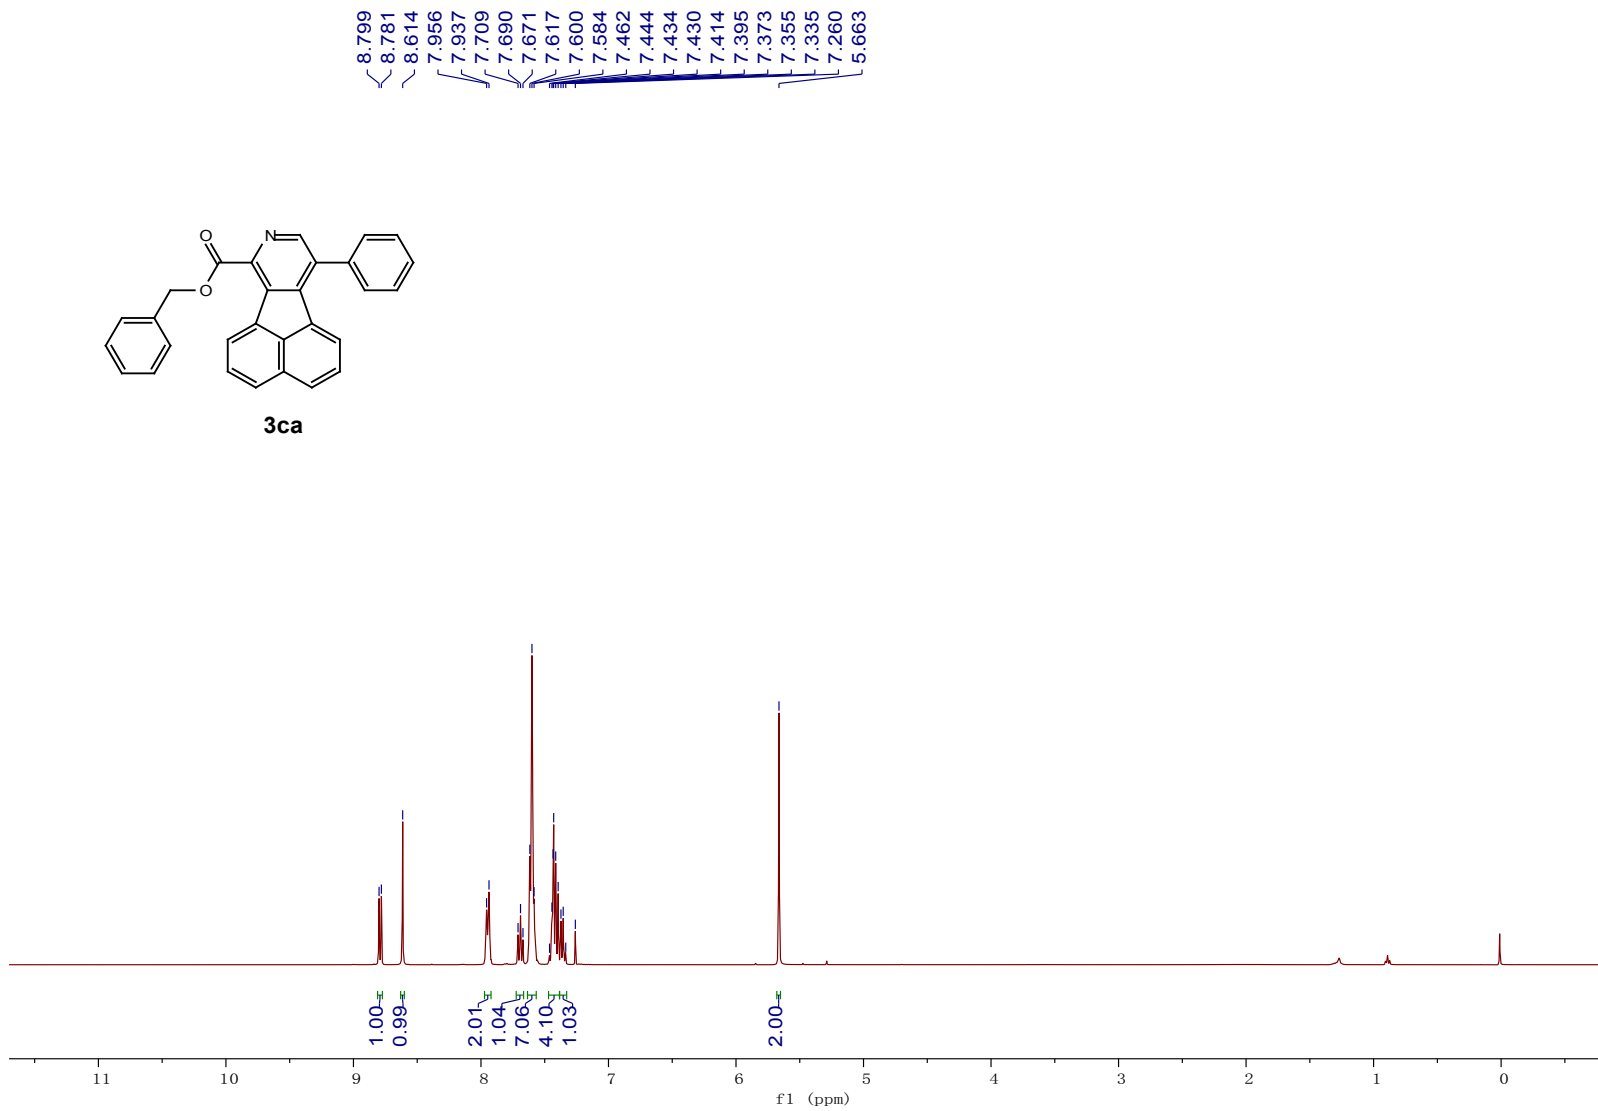



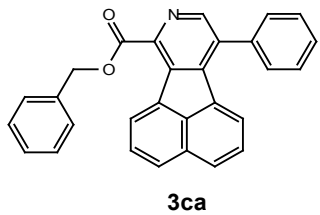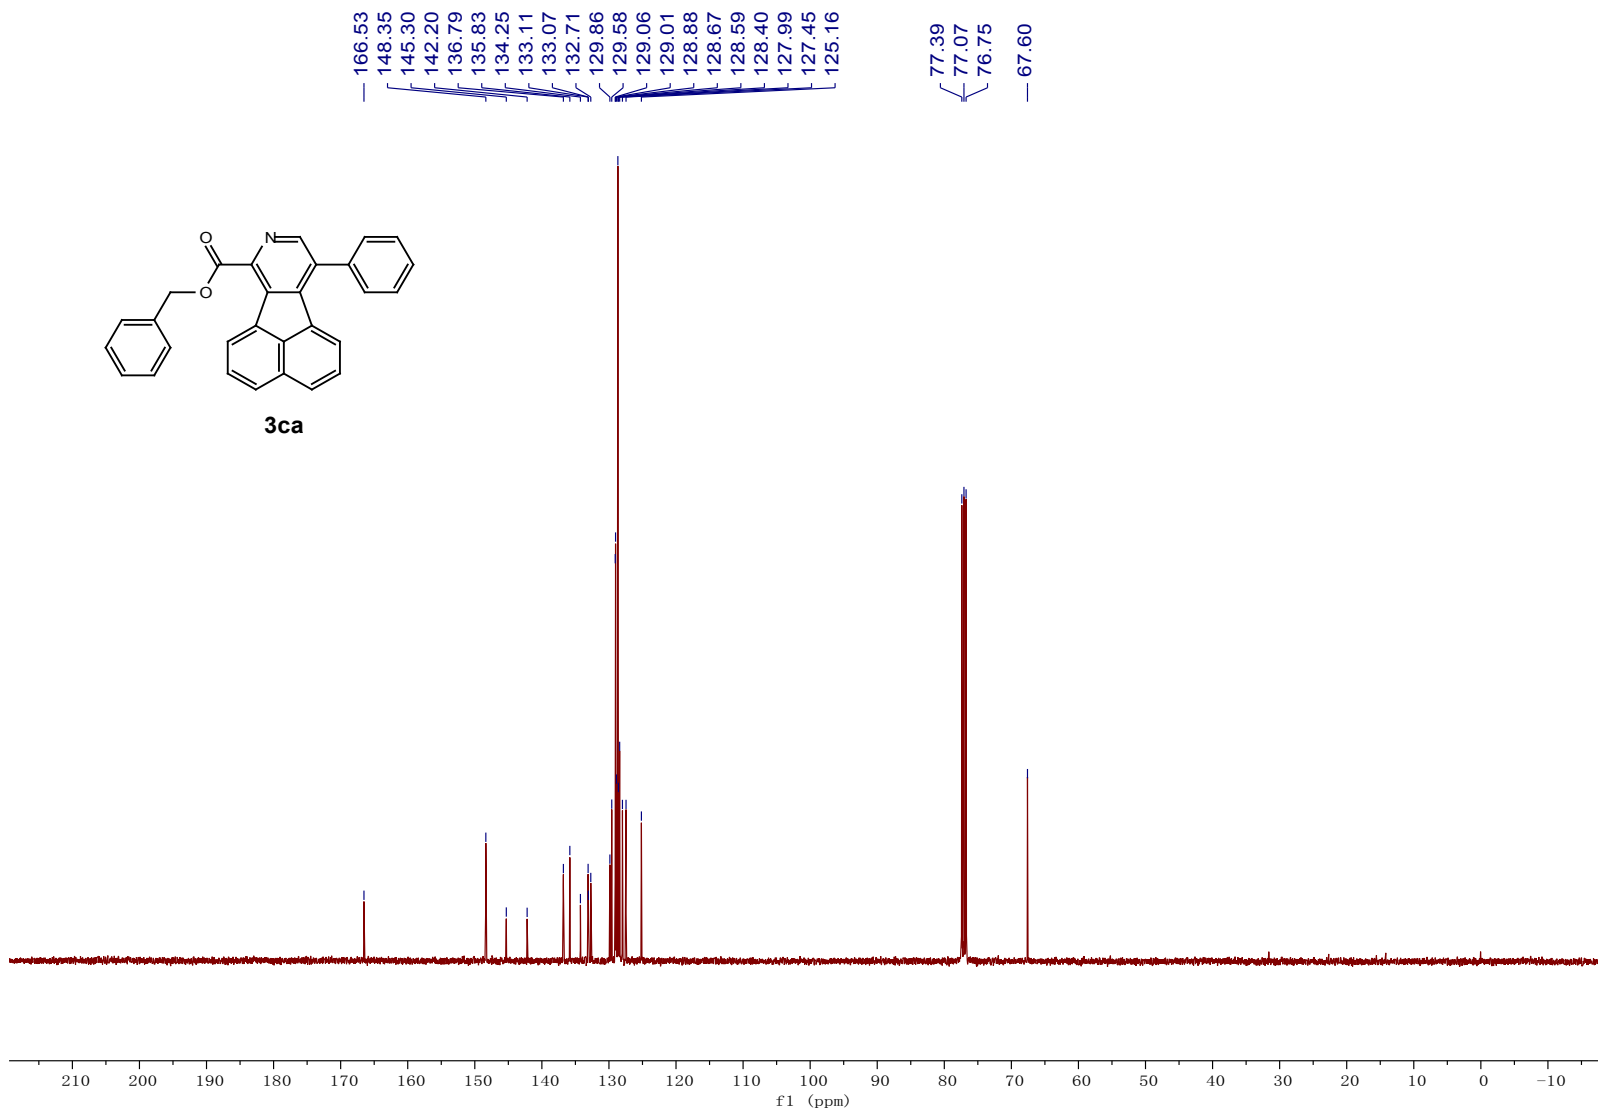

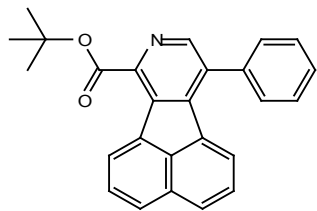

3da

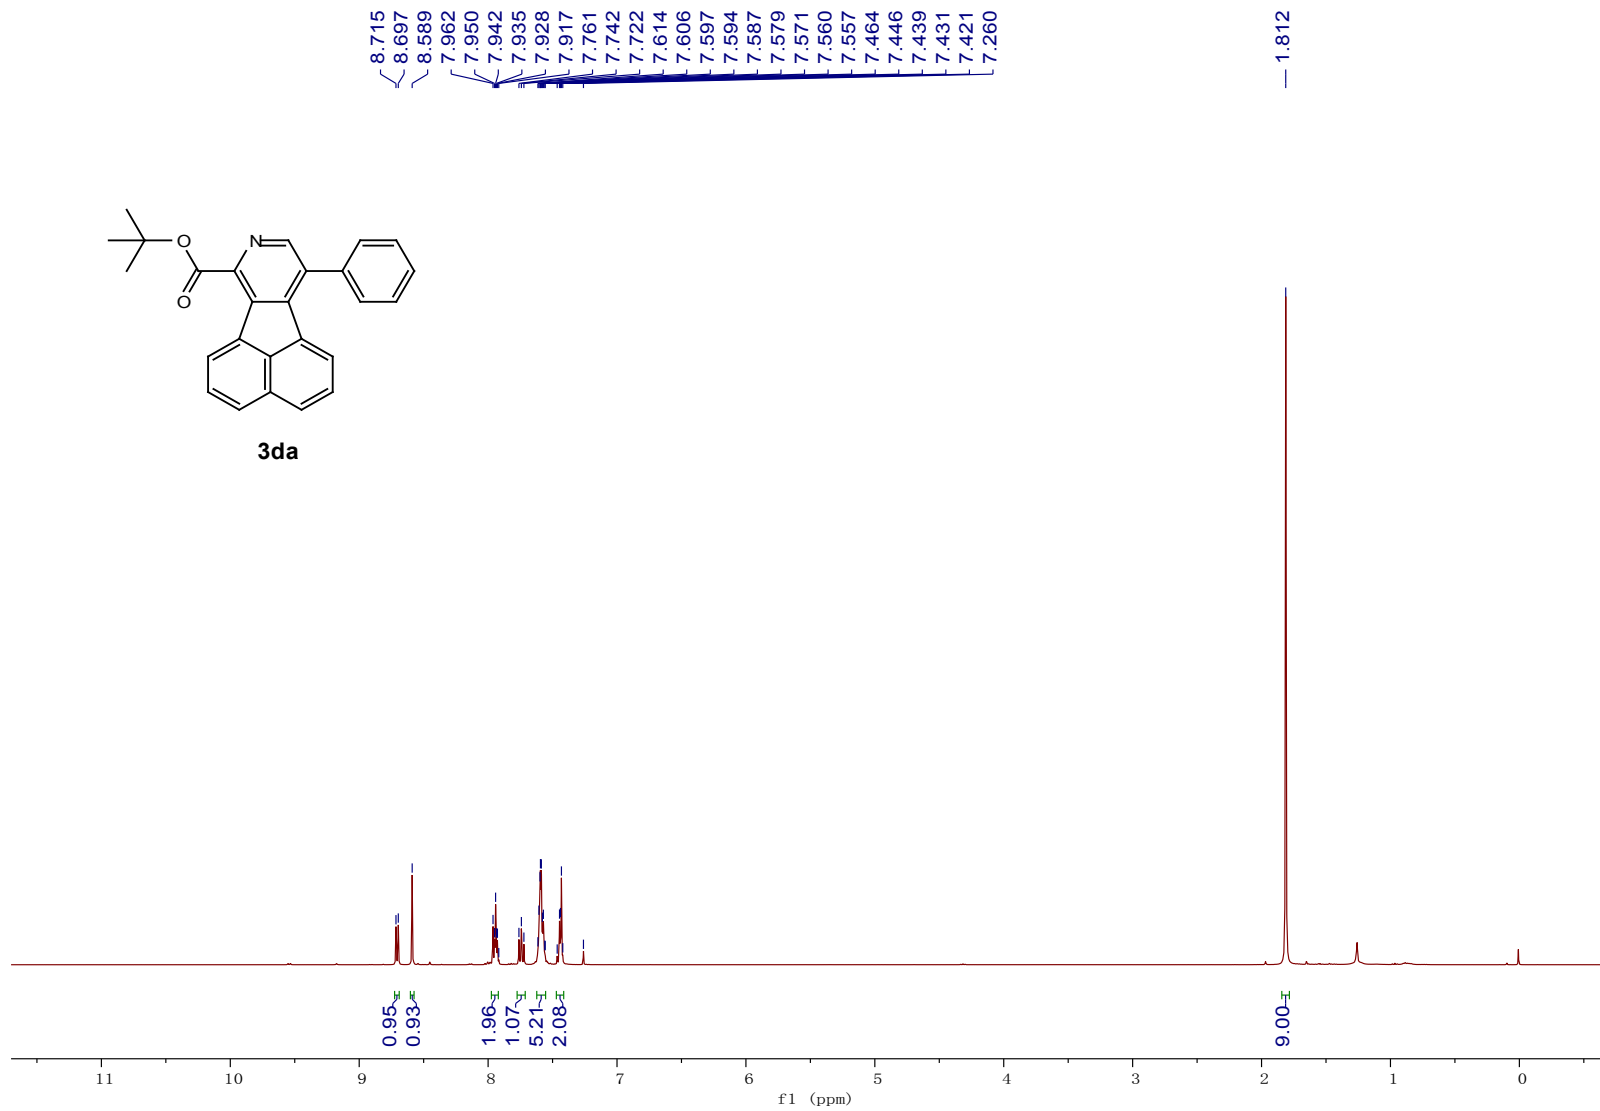

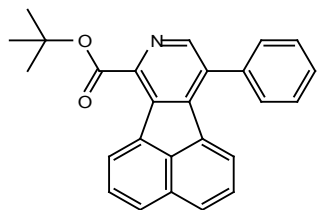

**3da**

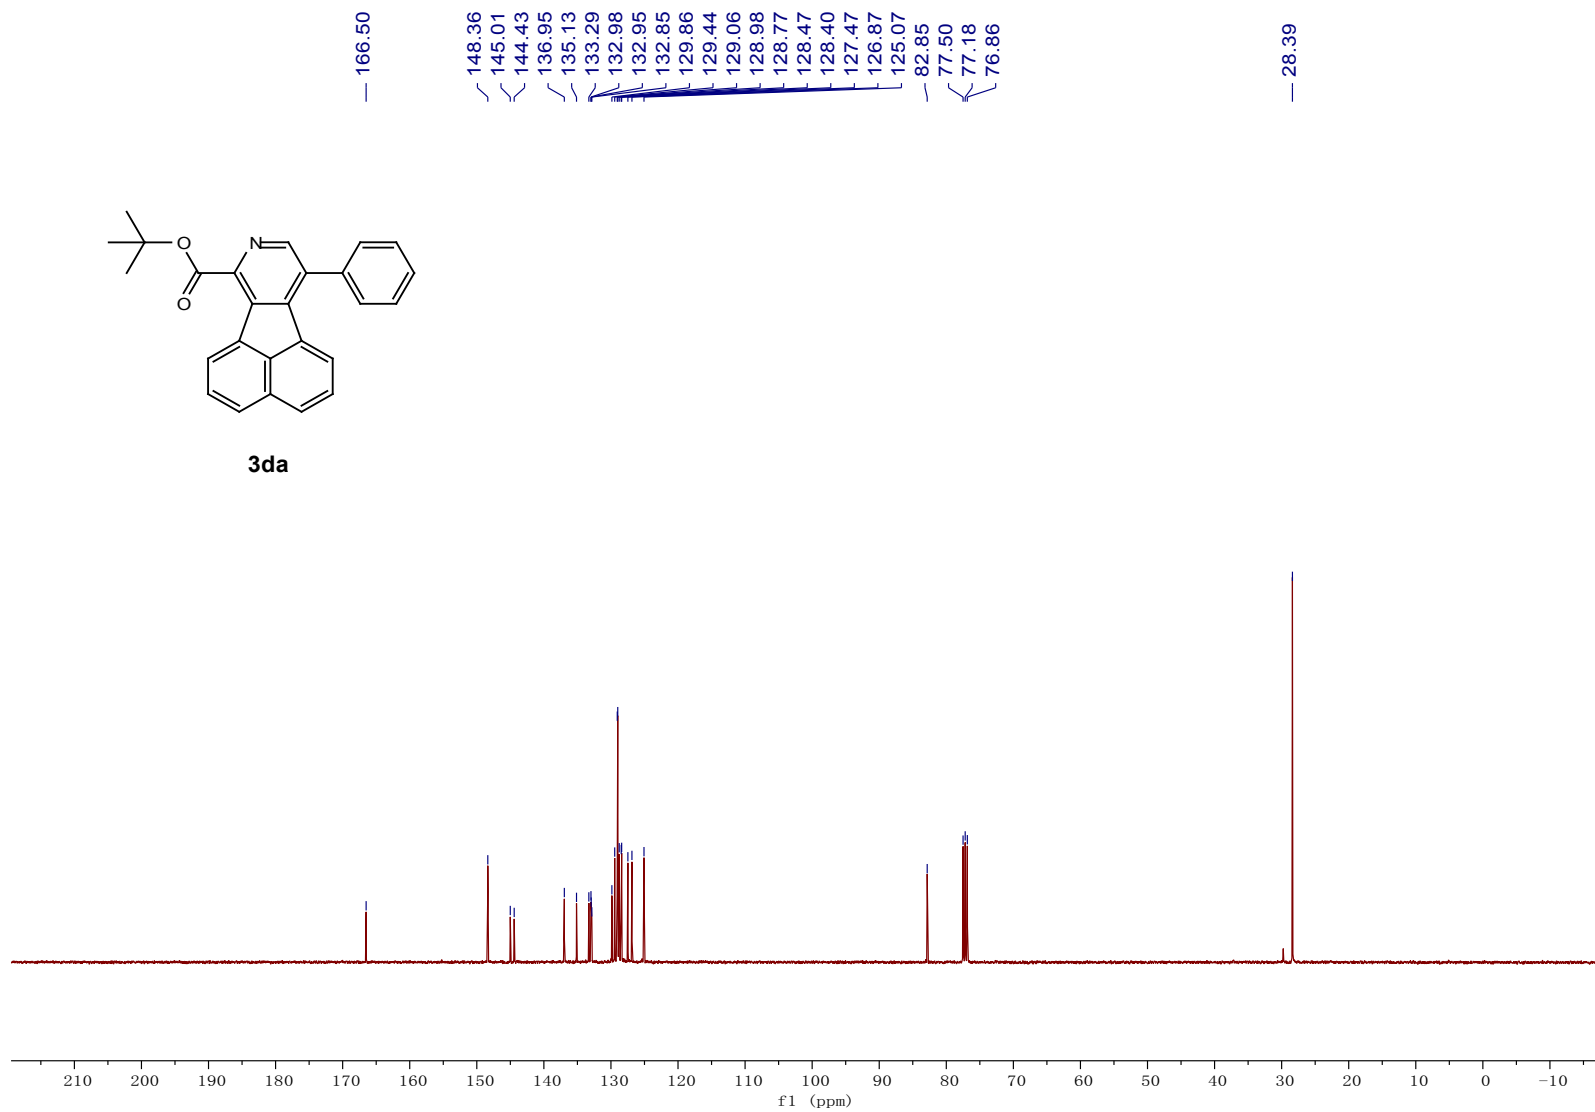

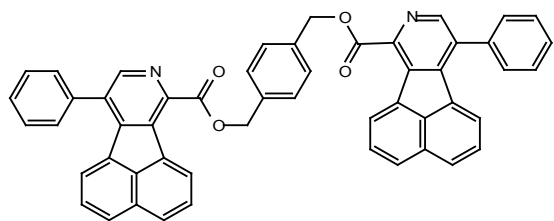

3ea

8.778  
8.760  
8.606  
7.928  
7.922  
7.912  
7.906  
7.893  
7.873  
7.676  
7.658  
7.638  
7.589  
7.433  
7.423  
7.417  
7.260  
5.666

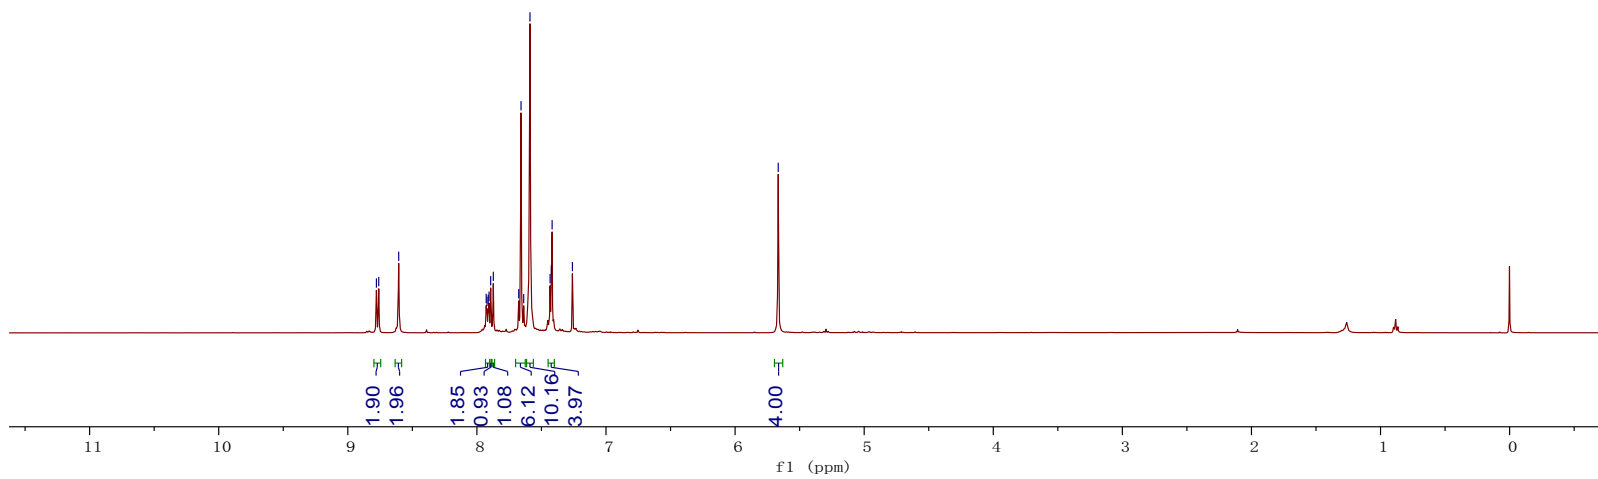

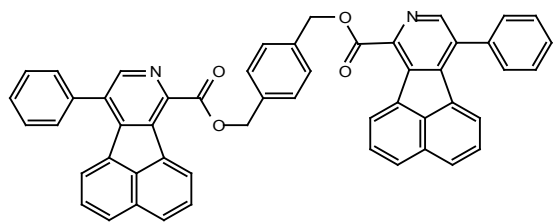

3ea

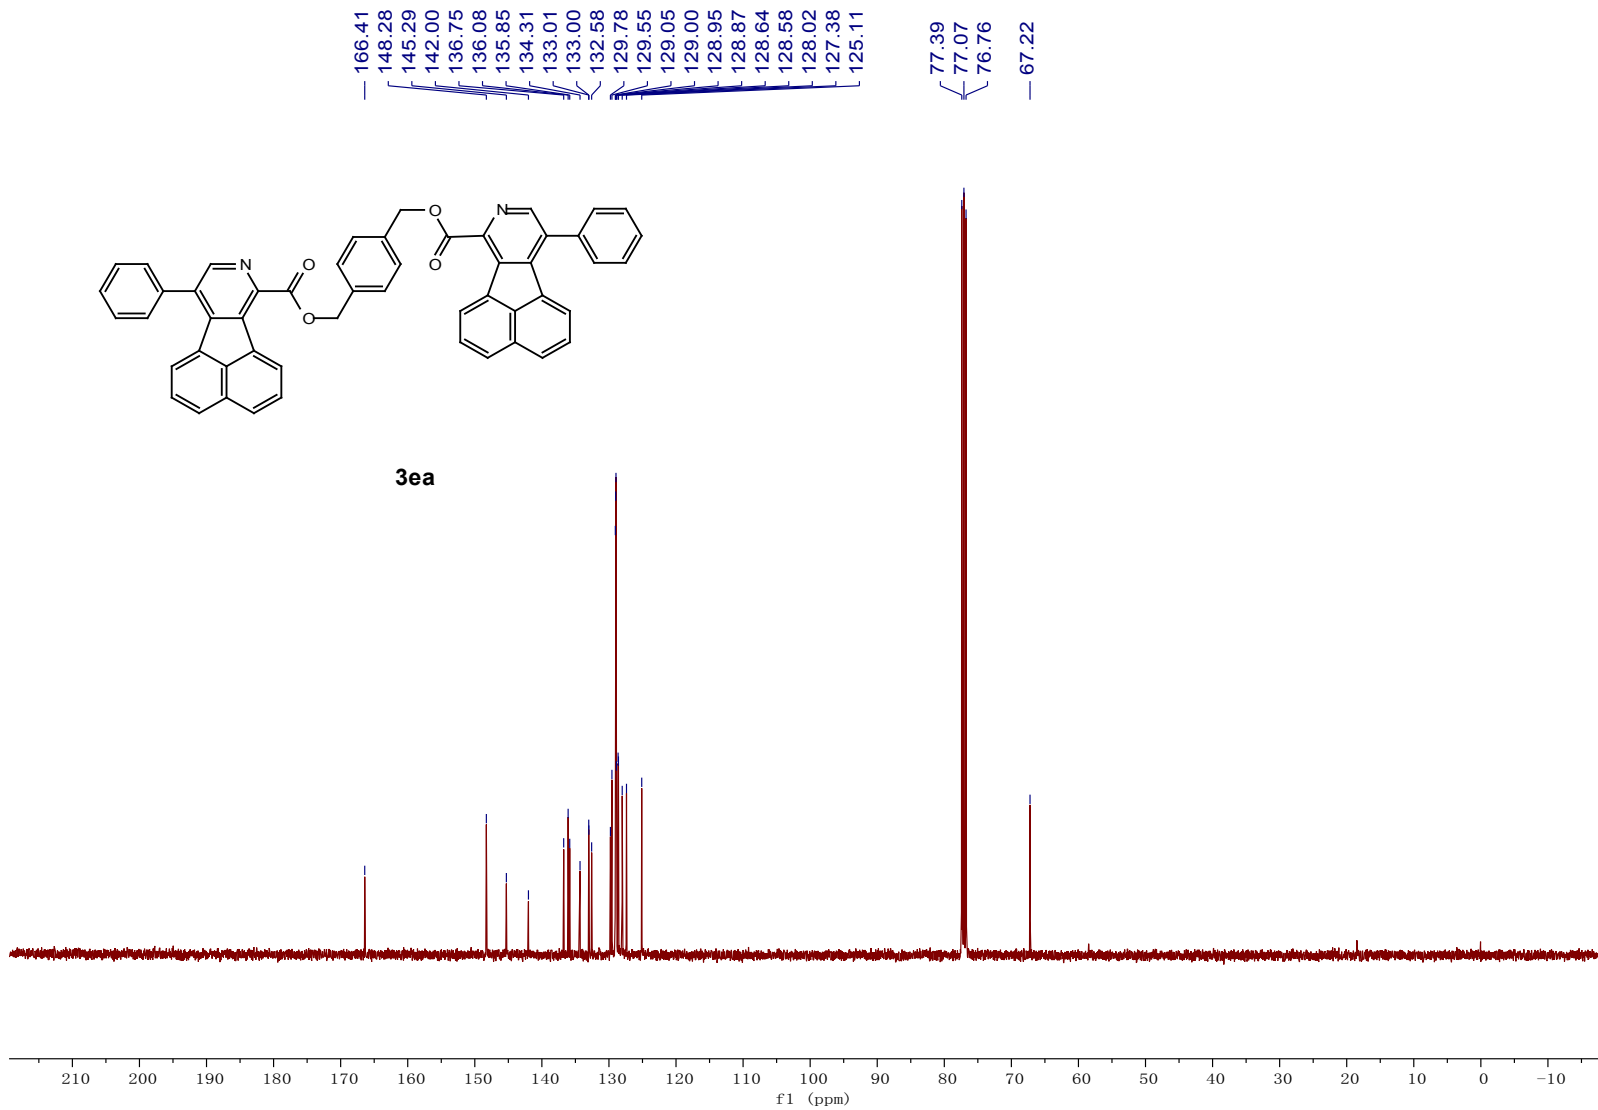

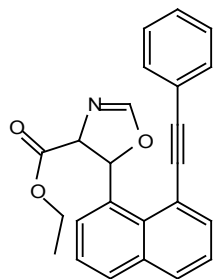

intermediate B1

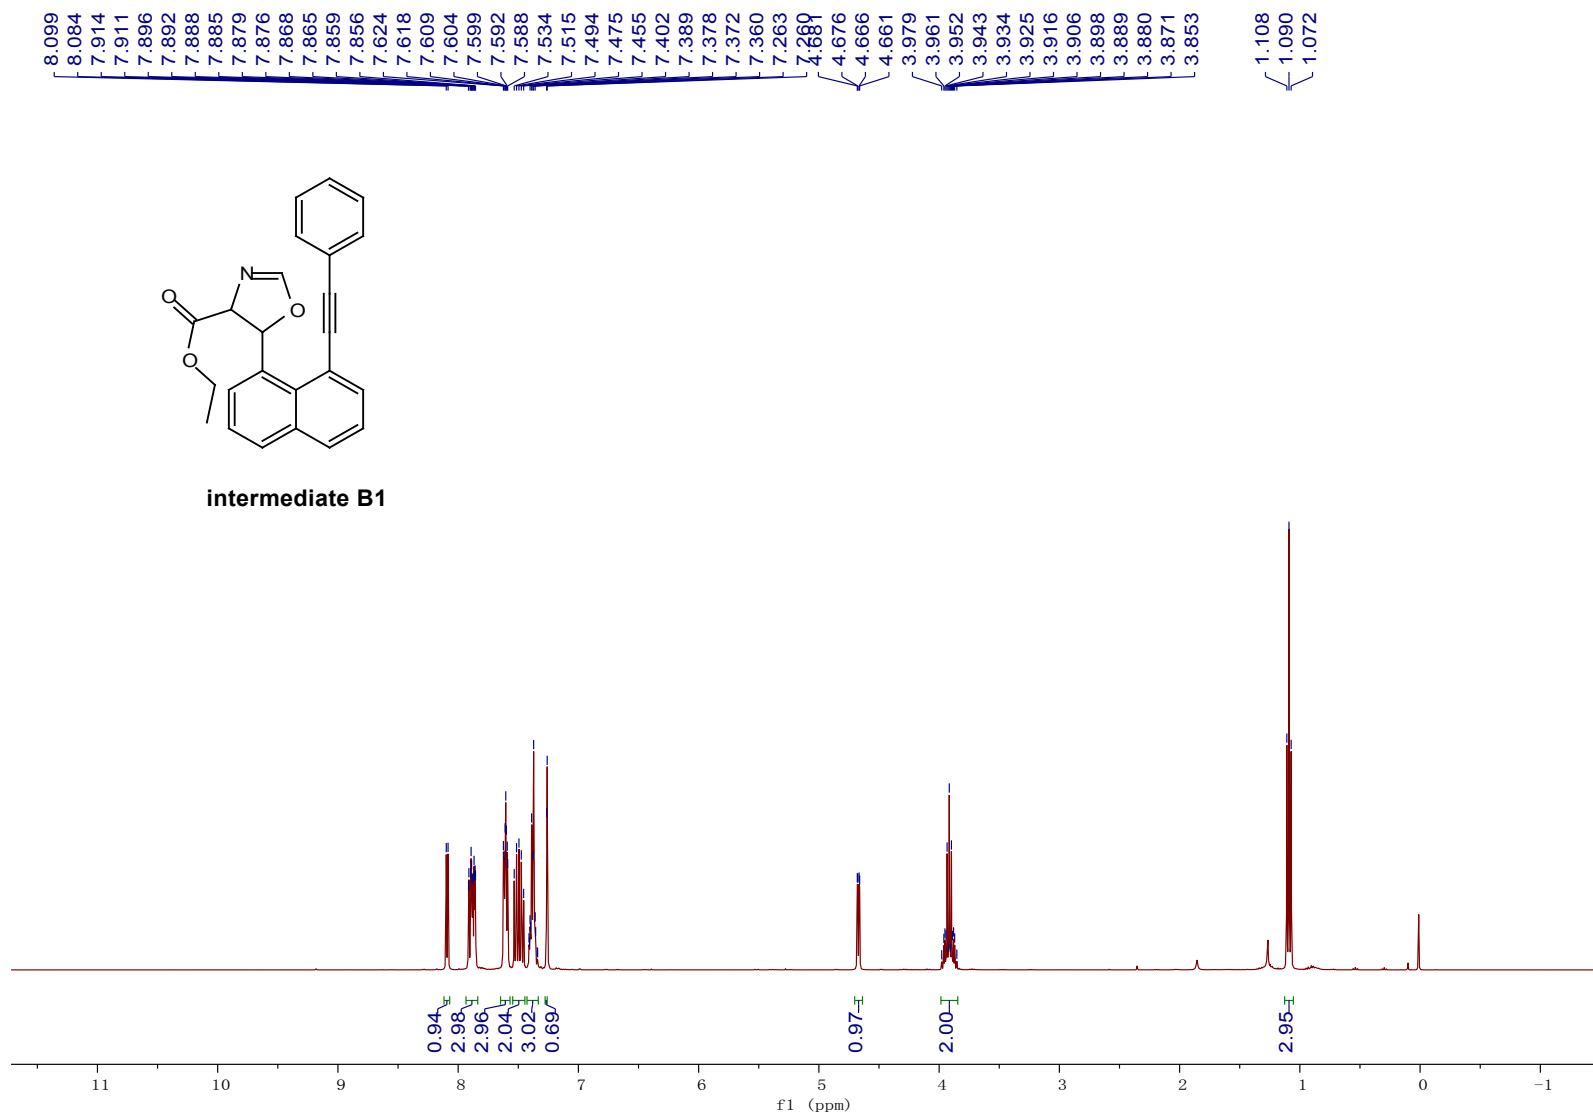

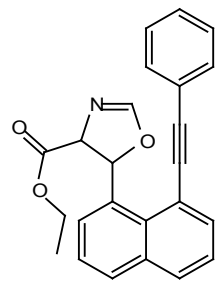

intermediate B1

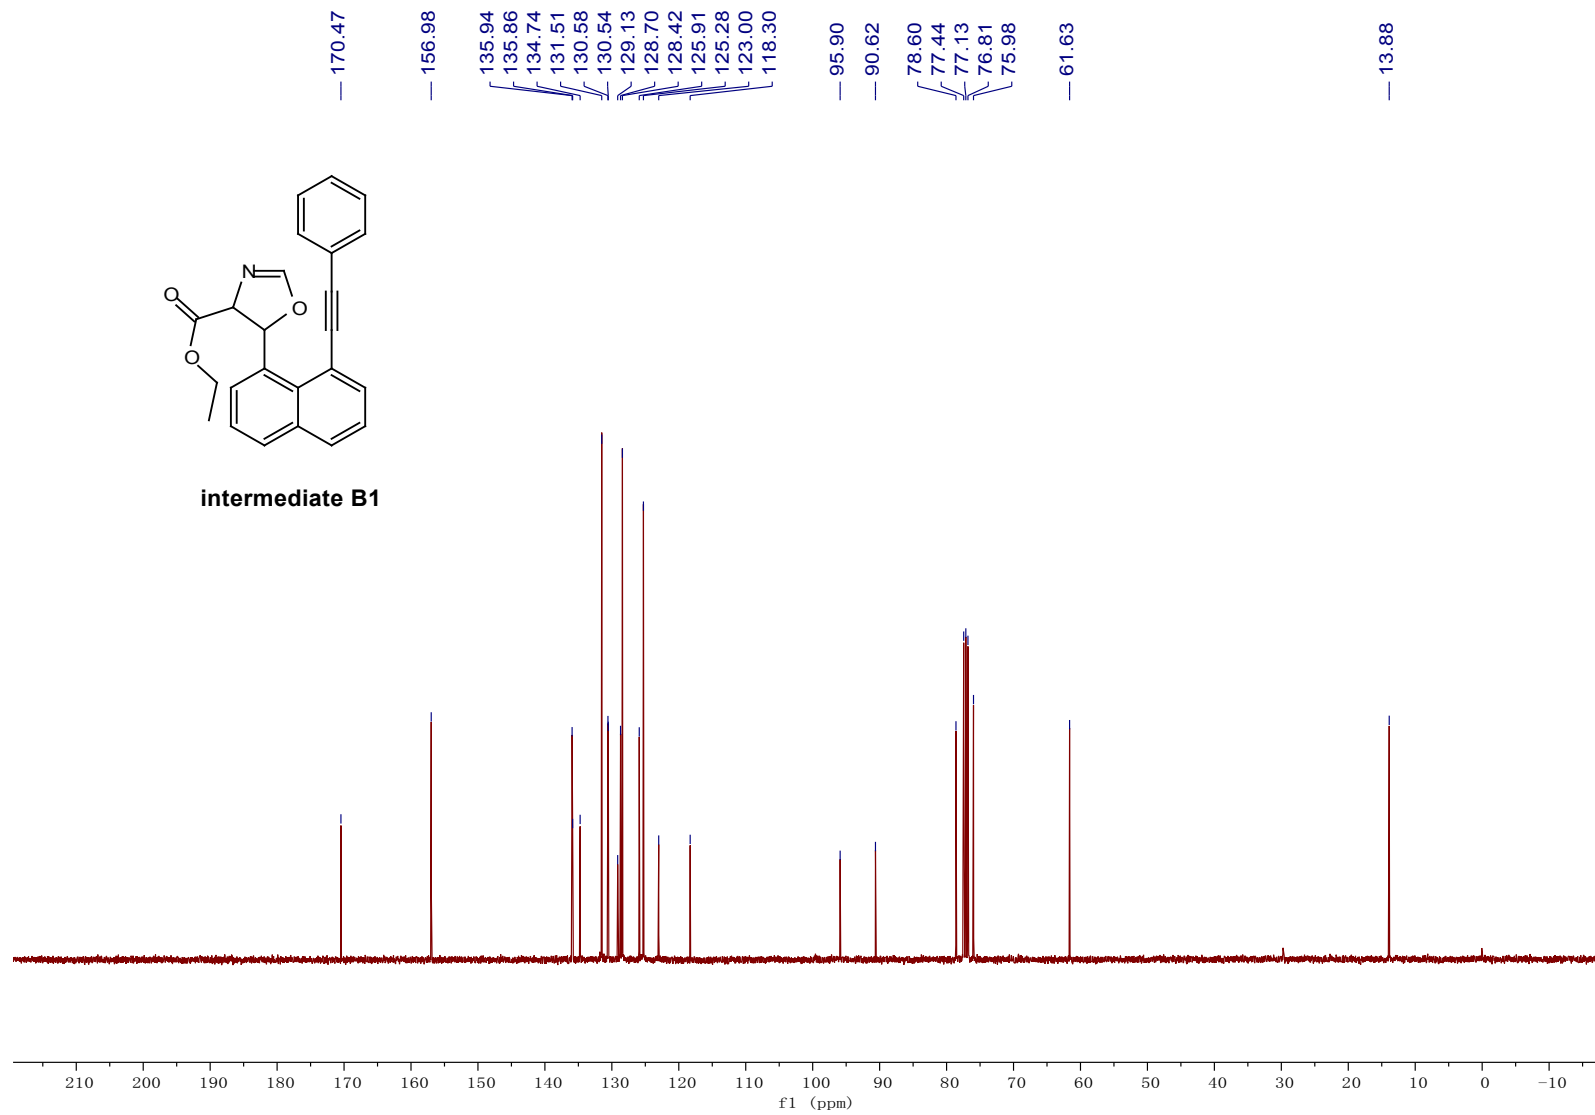

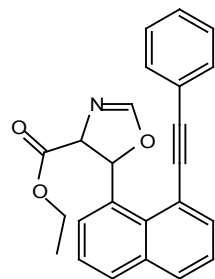

intermediate B2

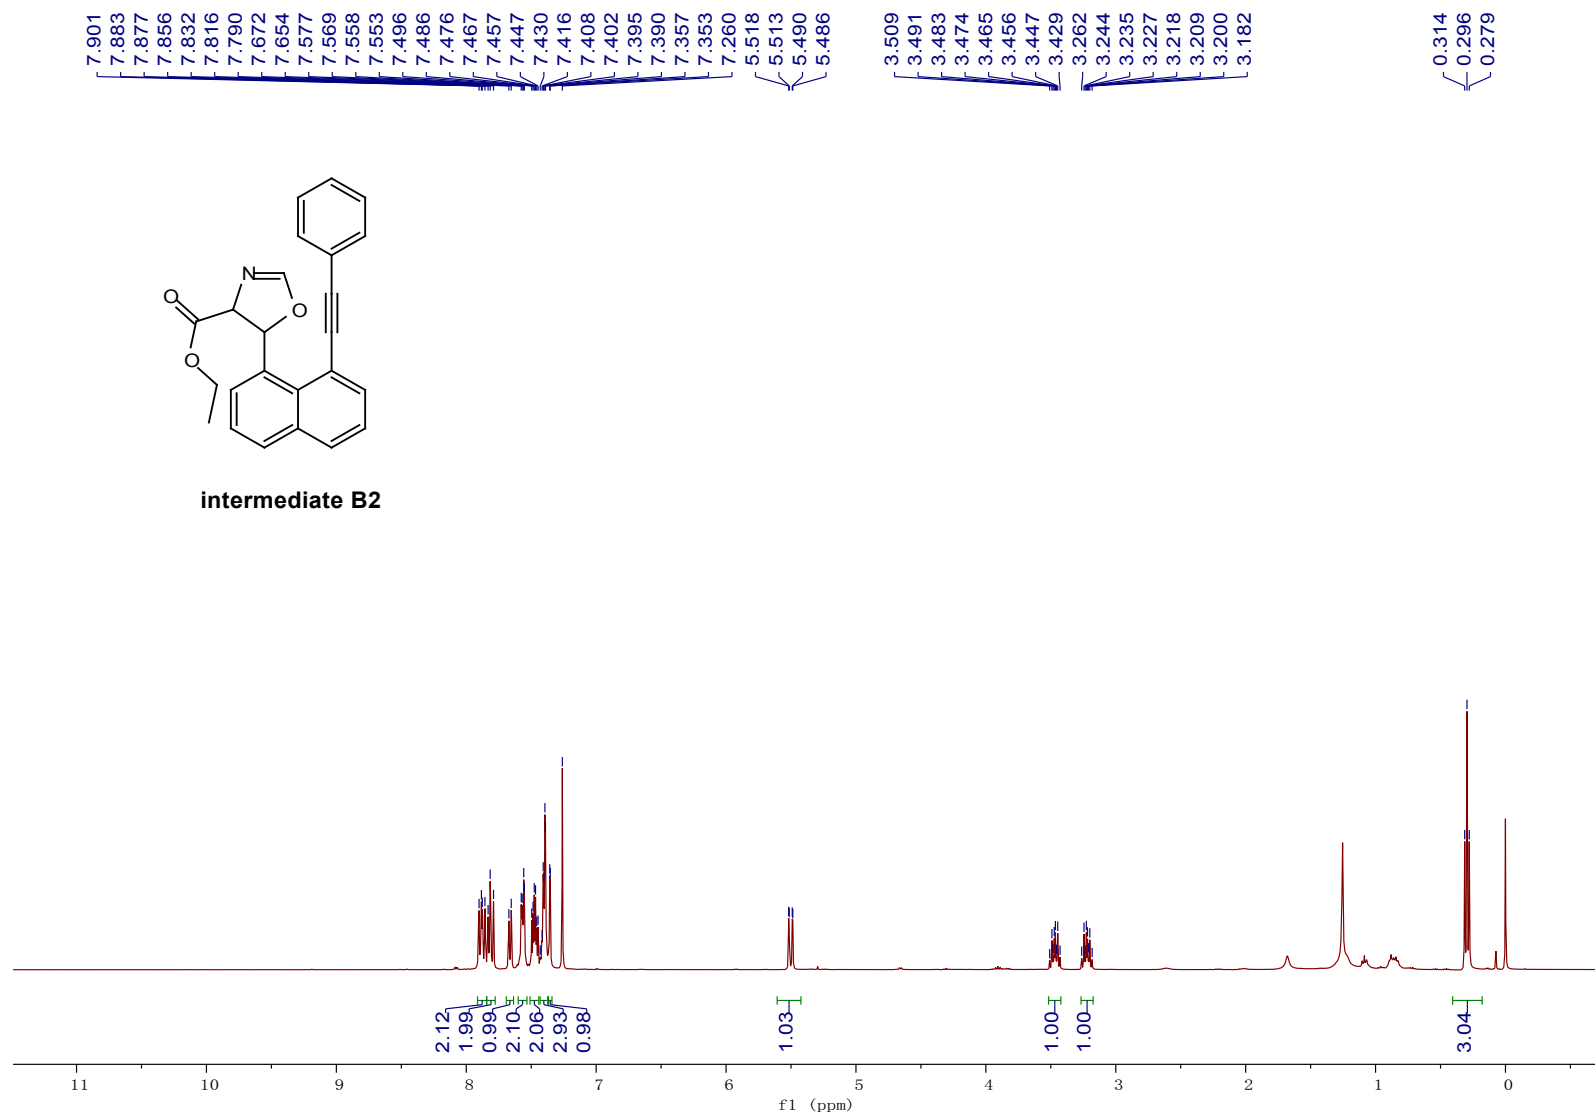



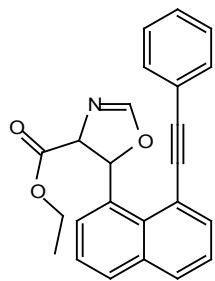

intermediate B2

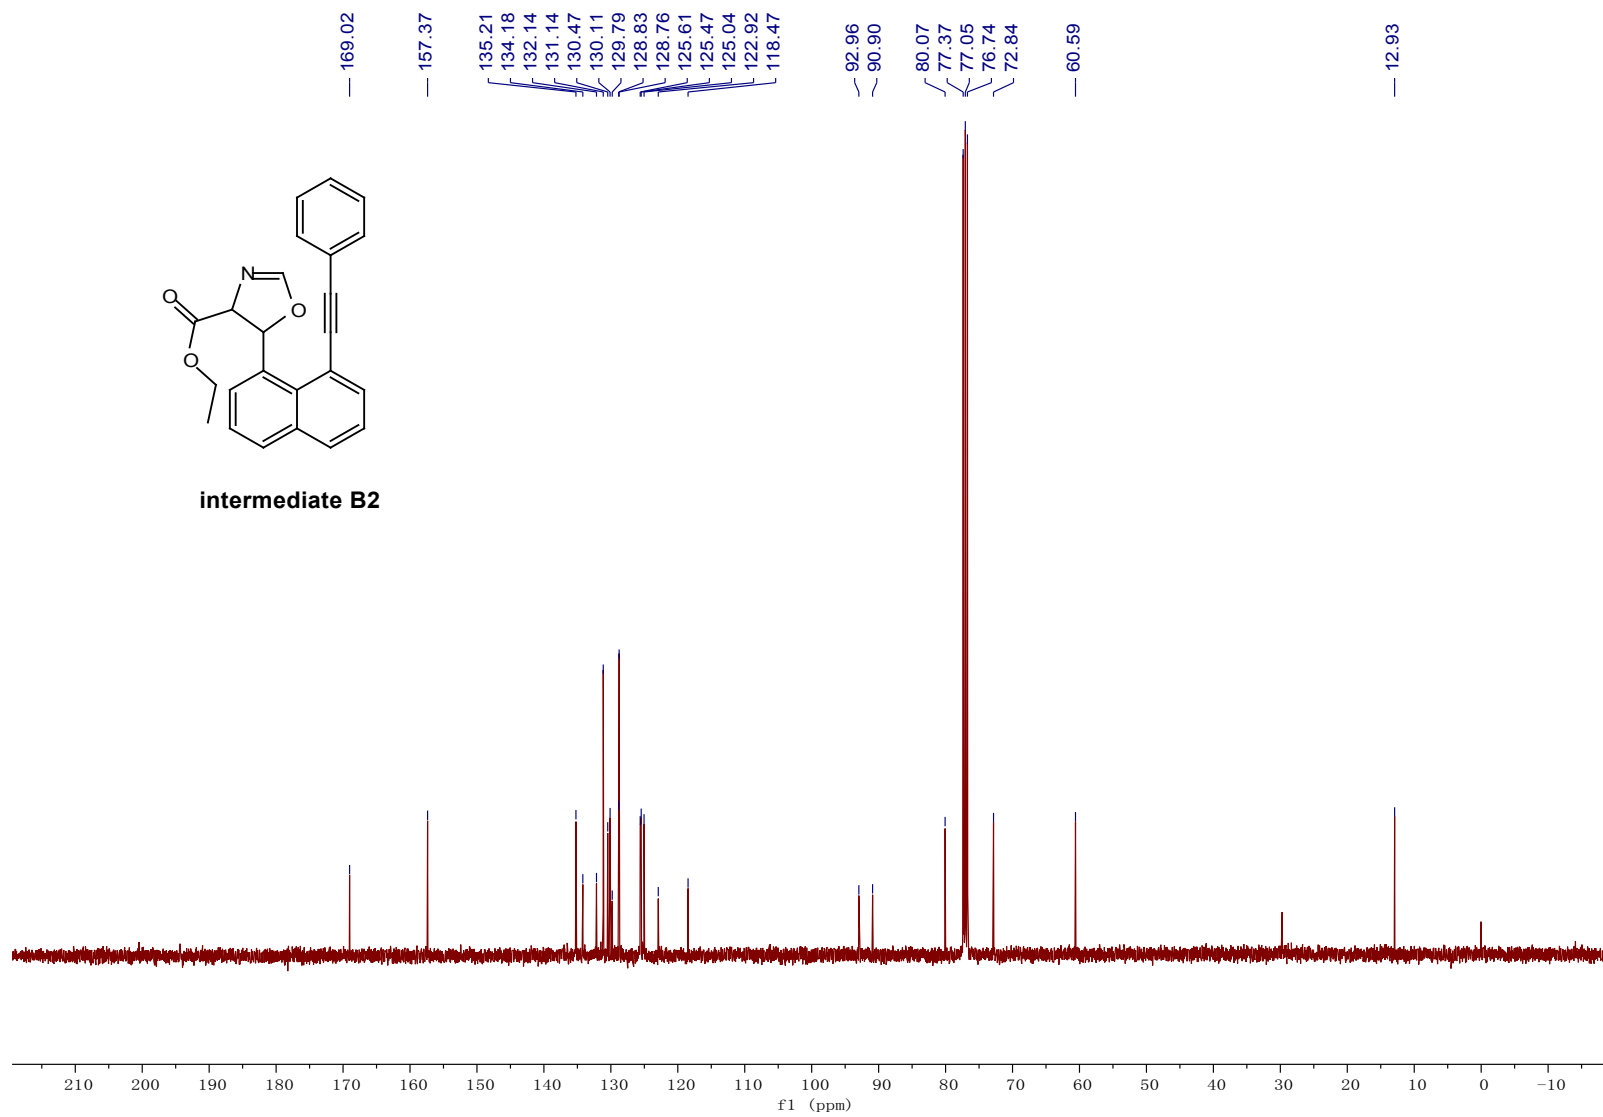

Supplement: d1cc01015h1.pdf [file d1cc01015h1.pdf]
